# Supplementary material
Source: PubMed Central journal article supplement (PMC5455955)
Supplement: NIHMS73005-supplement-Supplementary_Table_1.pdf [file NIHMS73005-supplement-Supplementary_Table_1.pdf]

| #  | Substrate | Product | Condition | N | formation | sd       | se       | Reaction     |
|----|-----------|---------|-----------|---|-----------|----------|----------|--------------|
| 1  | aco       | aco     | Control   | 3 | NA        | NA       | NA       | aco -> aco   |
| 2  | aco       | aco     | Fe(II)    | 3 | NA        | NA       | NA       | aco -> aco   |
| 3  | aco       | aco     | FeSS2O8   | 3 | -0.06742  | 0.059368 | 0.034276 | aco -> aco   |
| 4  | aco       | aco     | S2O8      | 3 | NA        | NA       | NA       | aco -> aco   |
| 5  | aco       | mal     | Control   | 3 | NA        | NA       | NA       | aco -> mal   |
| 6  | aco       | mal     | Fe(II)    | 3 | NA        | NA       | NA       | aco -> mal   |
| 7  | aco       | mal     | FeSS2O8   | 3 | NA        | NA       | NA       | aco -> mal   |
| 8  | aco       | mal     | S2O8      | 3 | 0.00393   | 0.000685 | 0.000396 | aco -> mal   |
| 9  | aco       | pyr     | Control   | 3 | NA        | NA       | NA       | aco -> pyr   |
| 10 | aco       | pyr     | Fe(II)    | 3 | NA        | NA       | NA       | aco -> pyr   |
| 11 | aco       | pyr     | FeSS2O8   | 3 | 0.141927  | 0.034501 | 0.019919 | aco -> pyr   |
| 12 | aco       | pyr     | S2O8      | 3 | 0.017353  | 0.001577 | 0.00091  | aco -> pyr   |
| 13 | aco       | ssa     | Control   | 3 | NA        | NA       | NA       | aco -> ssa   |
| 14 | aco       | ssa     | Fe(II)    | 3 | NA        | NA       | NA       | aco -> ssa   |
| 15 | aco       | ssa     | FeSS2O8   | 3 | 0.109217  | 0.040086 | 0.023144 | aco -> ssa   |
| 16 | aco       | ssa     | S2O8      | 3 | 0.002343  | 0.000655 | 0.000378 | aco -> ssa   |
| 17 | aco       | suc     | Control   | 3 | NA        | NA       | NA       | aco -> suc   |
| 18 | aco       | suc     | Fe(II)    | 3 | NA        | NA       | NA       | aco -> suc   |
| 19 | aco       | suc     | FeSS2O8   | 3 | 0.01065   | 0.008236 | 0.004755 | aco -> suc   |
| 20 | aco       | suc     | S2O8      | 3 | 0.00329   | 0.001325 | 0.000765 | aco -> suc   |
| 21 | akg       | akg     | Control   | 3 | NA        | NA       | NA       | akg -> akg   |
| 22 | akg       | akg     | Fe(II)    | 3 | NA        | NA       | NA       | akg -> akg   |
| 23 | akg       | akg     | FeSS2O8   | 3 | -9.65435  | 0.066079 | 0.038151 | akg -> akg   |
| 24 | akg       | akg     | S2O8      | 3 | -0.14177  | 0.028071 | 0.016207 | akg -> akg   |
| 25 | akg       | mal     | Control   | 3 | NA        | NA       | NA       | akg -> mal   |
| 26 | akg       | mal     | Fe(II)    | 3 | NA        | NA       | NA       | akg -> mal   |
| 27 | akg       | mal     | FeSS2O8   | 3 | NA        | NA       | NA       | akg -> mal   |
| 28 | akg       | mal     | S2O8      | 3 | 0.001295  | 0.001373 | 0.000793 | akg -> mal   |
| 29 | akg       | pyr     | Control   | 3 | NA        | NA       | NA       | akg -> pyr   |
| 30 | akg       | pyr     | Fe(II)    | 3 | NA        | NA       | NA       | akg -> pyr   |
| 31 | akg       | pyr     | FeSS2O8   | 3 | 0.003399  | 0.001121 | 0.000647 | akg -> pyr   |
| 32 | akg       | pyr     | S2O8      | 3 | 0.009322  | 0.001307 | 0.000755 | akg -> pyr   |
| 33 | akg       | suc     | Control   | 3 | NA        | NA       | NA       | akg -> suc   |
| 34 | akg       | suc     | Fe(II)    | 3 | 0.158416  | 0.064276 | 0.03711  | akg -> suc   |
| 35 | akg       | suc     | FeSS2O8   | 3 | 0.457182  | 0.188253 | 0.108688 | akg -> suc   |
| 36 | akg       | suc     | S2O8      | 3 | 0.141444  | 0.030981 | 0.017887 | akg -> suc   |
| 37 | cit       | cit     | Control   | 3 | NA        | NA       | NA       | cit -> cit   |
| 38 | cit       | cit     | Fe(II)    | 3 | NA        | NA       | NA       | cit -> cit   |
| 39 | cit       | cit     | FeSS2O8   | 3 | -8.37479  |          | 0        | 0 cit -> cit |
| 40 | cit       | cit     | S2O8      | 3 | NA        | NA       | NA       | cit -> cit   |
| 41 | cit       | pyr     | Control   | 3 | NA        | NA       | NA       | cit -> pyr   |
| 42 | cit       | pyr     | Fe(II)    | 3 | NA        | NA       | NA       | cit -> pyr   |
| 43 | cit       | pyr     | FeSS2O8   | 3 | 0.073753  | 0.047302 | 0.02731  | cit -> pyr   |
| 44 | cit       | pyr     | S2O8      | 3 | 0.01628   | 0.003447 | 0.00199  | cit -> pyr   |
| 45 | cit       | ssa     | Control   | 3 | NA        | NA       | NA       | cit -> ssa   |
| 46 | cit       | ssa     | Fe(II)    | 3 | NA        | NA       | NA       | cit -> ssa   |

|    |     |     |         |   |          |          |          |            |
|----|-----|-----|---------|---|----------|----------|----------|------------|
| 47 | cit | ssa | FeSS2O8 | 3 | 1.591163 | 0.407074 | 0.235025 | cit -> ssa |
| 48 | cit | ssa | S2O8    | 3 | 0.03044  | 0.003723 | 0.00215  | cit -> ssa |
| 49 | cit | suc | Control | 3 | NA       | NA       | NA       | cit -> suc |
| 50 | cit | suc | Fe(II)  | 3 | NA       | NA       | NA       | cit -> suc |
| 51 | cit | suc | FeSS2O8 | 3 | 7.33E-05 | 1.15E-05 | 6.67E-06 | cit -> suc |
| 52 | cit | suc | S2O8    | 3 | 0.001413 | 0.000199 | 0.000115 | cit -> suc |
| 53 | fum | fum | Control | 3 | NA       | NA       | NA       | fum -> fum |
| 54 | fum | fum | Fe(II)  | 3 | NA       | NA       | NA       | fum -> fum |
| 55 | fum | fum | FeSS2O8 | 3 | -4.00993 | 0.390126 | 0.22524  | fum -> fum |
| 56 | fum | fum | S2O8    | 3 | -0.28614 | 0.010191 | 0.005884 | fum -> fum |
| 57 | fum | pyr | Control | 3 | NA       | NA       | NA       | fum -> pyr |
| 58 | fum | pyr | Fe(II)  | 3 | NA       | NA       | NA       | fum -> pyr |
| 59 | fum | pyr | FeSS2O8 | 3 | 0.06962  | 0.034602 | 0.019978 | fum -> pyr |
| 60 | fum | pyr | S2O8    | 3 | 0.005992 | 0.001165 | 0.000673 | fum -> pyr |
| 61 | fum | suc | Control | 3 | NA       | NA       | NA       | fum -> suc |
| 62 | fum | suc | Fe(II)  | 3 | NA       | NA       | NA       | fum -> suc |
| 63 | fum | suc | FeSS2O8 | 3 | NA       | NA       | NA       | fum -> suc |
| 64 | fum | suc | S2O8    | 3 | 0.005318 | 0.006314 | 0.003645 | fum -> suc |
| 65 | ict | aco | Control | 3 | NA       | NA       | NA       | ict -> aco |
| 66 | ict | aco | Fe(II)  | 3 | NA       | NA       | NA       | ict -> aco |
| 67 | ict | aco | FeSS2O8 | 3 | 0.01209  | 0.001234 | 0.000713 | ict -> aco |
| 68 | ict | aco | S2O8    | 3 | 0.024447 | 0.000994 | 0.000574 | ict -> aco |
| 69 | ict | akg | Control | 3 | NA       | NA       | NA       | ict -> akg |
| 70 | ict | akg | Fe(II)  | 3 | 0.035958 | 0.023565 | 0.013605 | ict -> akg |
| 71 | ict | akg | FeSS2O8 | 3 | 0.597397 | 0.207213 | 0.119635 | ict -> akg |
| 72 | ict | akg | S2O8    | 3 | 0.033523 | 0.000942 | 0.000544 | ict -> akg |
| 73 | ict | cit | Control | 3 | NA       | NA       | NA       | ict -> cit |
| 74 | ict | cit | Fe(II)  | 3 | NA       | NA       | NA       | ict -> cit |
| 75 | ict | cit | FeSS2O8 | 3 | -2.21979 | 0        | 0        | ict -> cit |
| 76 | ict | cit | S2O8    | 3 | -0.09677 | 0.01666  | 0.009618 | ict -> cit |
| 77 | ict | mal | Control | 3 | NA       | NA       | NA       | ict -> mal |
| 78 | ict | mal | Fe(II)  | 3 | NA       | NA       | NA       | ict -> mal |
| 79 | ict | mal | FeSS2O8 | 3 | 0.1888   | 0.027054 | 0.01562  | ict -> mal |
| 80 | ict | mal | S2O8    | 3 | 0.001497 | 0.000698 | 0.000403 | ict -> mal |
| 81 | ict | pyr | Control | 3 | NA       | NA       | NA       | ict -> pyr |
| 82 | ict | pyr | Fe(II)  | 3 | 0.007031 | 0.006229 | 0.003596 | ict -> pyr |
| 83 | ict | pyr | FeSS2O8 | 3 | 0.111093 | 0.012928 | 0.007464 | ict -> pyr |
| 84 | ict | pyr | S2O8    | 3 | 0.025543 | 0.002099 | 0.001212 | ict -> pyr |
| 85 | ict | ssa | Control | 3 | NA       | NA       | NA       | ict -> ssa |
| 86 | ict | ssa | Fe(II)  | 3 | NA       | NA       | NA       | ict -> ssa |
| 87 | ict | ssa | FeSS2O8 | 3 | 1.36497  | 0.269078 | 0.155352 | ict -> ssa |
| 88 | ict | ssa | S2O8    | 3 | 0.035677 | 0.012376 | 0.007146 | ict -> ssa |
| 89 | ict | suc | Control | 3 | NA       | NA       | NA       | ict -> suc |
| 90 | ict | suc | Fe(II)  | 3 | 0.114884 | 0.167849 | 0.096908 | ict -> suc |
| 91 | ict | suc | FeSS2O8 | 3 | 0.193843 | 0.080196 | 0.046301 | ict -> suc |
| 92 | ict | suc | S2O8    | 3 | 0.059023 | 0.009537 | 0.005506 | ict -> suc |
| 93 | mal | mal | Control | 3 | NA       | NA       | NA       | mal -> mal |

|     |     |     |         |   |          |          |          |            |
|-----|-----|-----|---------|---|----------|----------|----------|------------|
| 94  | mal | mal | Fe(II)  | 3 | NA       | NA       | NA       | mal -> mal |
| 95  | mal | mal | FeSS2O8 | 3 | -10.1487 | 1.714028 | 0.989595 | mal -> mal |
| 96  | mal | mal | S2O8    | 3 | -0.15363 | 0.006381 | 0.003684 | mal -> mal |
| 97  | mal | pyr | Control | 3 | NA       | NA       | NA       | mal -> pyr |
| 98  | mal | pyr | Fe(II)  | 3 | NA       | NA       | NA       | mal -> pyr |
| 99  | mal | pyr | FeSS2O8 | 3 | 0.455154 | 0.07448  | 0.043001 | mal -> pyr |
| 100 | mal | pyr | S2O8    | 3 | 0.042726 | 0.002478 | 0.001431 | mal -> pyr |
| 101 | mal | suc | Control | 3 | NA       | NA       | NA       | mal -> suc |
| 102 | mal | suc | Fe(II)  | 3 | NA       | NA       | NA       | mal -> suc |
| 103 | mal | suc | FeSS2O8 | 3 | NA       | NA       | NA       | mal -> suc |
| 104 | mal | suc | S2O8    | 3 | 0.001742 | 0.000203 | 0.000117 | mal -> suc |
| 105 | ssa | pyr | Control | 3 | NA       | NA       | NA       | ssa -> pyr |
| 106 | ssa | pyr | Fe(II)  | 3 | NA       | NA       | NA       | ssa -> pyr |
| 107 | ssa | pyr | FeSS2O8 | 3 | 0.000507 | 0.000227 | 0.000131 | ssa -> pyr |
| 108 | ssa | pyr | S2O8    | 3 | 0.01039  | 0.003336 | 0.001926 | ssa -> pyr |
| 109 | ssa | ssa | Control | 3 | NA       | NA       | NA       | ssa -> ssa |
| 110 | ssa | ssa | Fe(II)  | 3 | NA       | NA       | NA       | ssa -> ssa |
| 111 | ssa | ssa | FeSS2O8 | 3 | -3.45936 | 0.231334 | 0.133561 | ssa -> ssa |
| 112 | ssa | ssa | S2O8    | 3 | -0.63805 | 0.07484  | 0.043209 | ssa -> ssa |
| 113 | ssa | suc | Control | 3 | NA       | NA       | NA       | ssa -> suc |
| 114 | ssa | suc | Fe(II)  | 3 | NA       | NA       | NA       | ssa -> suc |
| 115 | ssa | suc | FeSS2O8 | 3 | 3.834127 | 0.477036 | 0.275417 | ssa -> suc |
| 116 | ssa | suc | S2O8    | 3 | 0.684777 | 0.133709 | 0.077197 | ssa -> suc |
| 117 | suc | pyr | Control | 3 | NA       | NA       | NA       | suc -> pyr |
| 118 | suc | pyr | Fe(II)  | 3 | NA       | NA       | NA       | suc -> pyr |
| 119 | suc | pyr | FeSS2O8 | 3 | NA       | NA       | NA       | suc -> pyr |
| 120 | suc | pyr | S2O8    | 3 | 0.021765 | 0.009854 | 0.005689 | suc -> pyr |
| 121 | suc | ssa | Control | 3 | NA       | NA       | NA       | suc -> ssa |
| 122 | suc | ssa | Fe(II)  | 3 | NA       | NA       | NA       | suc -> ssa |
| 123 | suc | ssa | FeSS2O8 | 3 | 0.000774 | 0.000535 | 0.000309 | suc -> ssa |
| 124 | suc | ssa | S2O8    | 3 | 0.000687 | 0.000568 | 0.000328 | suc -> ssa |
| 125 | suc | suc | Control | 3 | NA       | NA       | NA       | suc -> suc |
| 126 | suc | suc | Fe(II)  | 3 | NA       | NA       | NA       | suc -> suc |
| 127 | suc | suc | FeSS2O8 | 3 | NA       | NA       | NA       | suc -> suc |
| 128 | suc | suc | S2O8    | 3 | -0.02706 | 0.017275 | 0.009974 | suc -> suc |
