# Supplementary material
Source: PubMed Central journal article supplement (PMC5455955)
Supplement: NIHMS73005-supplement-Supplementary_Table_2.pdf [file NIHMS73005-supplement-Supplementary_Table_2.pdf]

| Reaction   | Substrate  | Product    | Condition  | Repl 1   | Repl 2    | Repl 3   |
|------------|------------|------------|------------|----------|-----------|----------|
| iso -> pyr | Isocitrate | Pyruvate   | normoxic n | 0.006854 | 0.009981  | 0.00086  |
| iso -> akg | Isocitrate | Alpha-keto | normoxic n | 0.0292   | 0.042245  | 0.010553 |
| iso -> suc | Isocitrate | Succinate  | normoxic n | 0.175031 | 0.199419  | 0.013789 |
| akg -> suc | Alpha-keto | Succinate  | normoxic n | 0.179997 | 0.087454  | 0.089009 |
| iso -> pyr | Isocitrate | Pyruvate   | anoxic mix | 0.002353 | 0.006587  | 0.007469 |
| iso -> akg | Isocitrate | Alpha-keto | anoxic mix | 0.022355 | 0.009675  | 0.017067 |
| iso -> suc | Isocitrate | Succinate  | anoxic mix | 0.032826 | 0.012407  | 0.01517  |
| akg -> suc | Alpha-keto | Succinate  | anoxic mix | 0.160422 | 0.084212  | 0.124369 |
| iso -> pyr | Isocitrate | Pyruvate   | Fe(II)     | NA       | 0.002627  | 0.011436 |
| iso -> akg | Isocitrate | Alpha-keto | Fe(II)     | 0.03132  | 0.061497  | 0.015056 |
| iso -> suc | Isocitrate | Succinate  | Fe(II)     | 0.308676 | 0.01536   | 0.020617 |
| akg -> suc | Alpha-keto | Succinate  | Fe(II)     | 0.2269   | 0.14895   | 0.099397 |
| iso -> pyr | Isocitrate | Pyruvate   | Fe(III)    | 0.011894 | 0.011357  | 0.005408 |
| iso -> akg | Isocitrate | Alpha-keto | Fe(III)    | -0.00045 | 0.005597  | 0.007543 |
| iso -> suc | Isocitrate | Succinate  | Fe(III)    | NA       | 0.017502  | 0.029488 |
| akg -> suc | Alpha-keto | Succinate  | Fe(III)    | 0.261724 | 0.179622  | 0.119931 |
| iso -> pyr | Isocitrate | Pyruvate   | Ni         | 0.028397 | 0.017214  | 0.002509 |
| iso -> akg | Isocitrate | Alpha-keto | Ni         | NA       | NA        | NA       |
| iso -> suc | Isocitrate | Succinate  | Ni         | 0.005322 | -0.00048  | 0.00038  |
| akg -> suc | Alpha-keto | Succinate  | Ni         | 0.002702 | 0.002778  | 0.001043 |
| iso -> pyr | Isocitrate | Pyruvate   | Co         | 0.000435 | 0.000544  | NA       |
| iso -> akg | Isocitrate | Alpha-keto | Co         | NA       | NA        | NA       |
| iso -> suc | Isocitrate | Succinate  | Co         | -0.00311 | -9.00E-06 | 0.001052 |
| akg -> suc | Alpha-keto | Succinate  | Co         | -0.00078 | -0.00171  | 0        |
| iso -> pyr | Isocitrate | Pyruvate   | Mo         | 0.002804 | 0.001088  | 0.001326 |
| iso -> akg | Isocitrate | Alpha-keto | Mo         | NA       | NA        | NA       |
| iso -> suc | Isocitrate | Succinate  | Mo         | 0        | 0.003655  | 0.000607 |
| akg -> suc | Alpha-keto | Succinate  | Mo         | -0.00015 | 0.016409  | 0.010251 |
| iso -> pyr | Isocitrate | Pyruvate   | Phosphate  | NA       | NA        | NA       |
| iso -> akg | Isocitrate | Alpha-keto | Phosphate  | NA       | NA        | NA       |
| iso -> suc | Isocitrate | Succinate  | Phosphate  | -0.00182 | 0.000578  | 0.000877 |
| akg -> suc | Alpha-keto | Succinate  | Phosphate  | 0.006268 | -0.00364  | 0        |
| iso -> pyr | Isocitrate | Pyruvate   | control    | NA       | NA        | 0.000308 |
| iso -> akg | Isocitrate | Alpha-keto | control    | NA       | NA        | NA       |
| iso -> suc | Isocitrate | Succinate  | control    | 0        | -0.00024  | 0.000499 |
| akg -> suc | Alpha-keto | Succinate  | control    | 0        | 0         | 0        |
