# Supplementary material
Source: PubMed Central journal article supplement (PMC5455955)
Supplement: NIHMS73005-supplement-Supplementary_Table_3.pdf [file NIHMS73005-supplement-Supplementary_Table_3.pdf]

| #  | Iron Source                        | Sulfur Sour                   | z-score  | Condition                                                          | Product        | Substrate     |
|----|------------------------------------|-------------------------------|----------|--------------------------------------------------------------------|----------------|---------------|
| 1  | FeCl <sub>2</sub>                  | S <sub>2</sub> O <sub>8</sub> | 0.662672 | S <sub>2</sub> O <sub>8</sub> + FeCl <sub>2</sub>                  | α-phenylacetog | cis-aconitate |
| 2  | FeCl <sub>3</sub>                  | S <sub>2</sub> O <sub>8</sub> | 1.971397 | S <sub>2</sub> O <sub>8</sub> + FeCl <sub>3</sub>                  | α-phenylacetog | cis-aconitate |
| 3  | Fe(ClO <sub>4</sub> ) <sub>2</sub> | S <sub>2</sub> O <sub>8</sub> | 0.321988 | S <sub>2</sub> O <sub>8</sub> + Fe(ClO <sub>4</sub> ) <sub>2</sub> | α-phenylacetog | cis-aconitate |
| 4  | Fe(ClO <sub>4</sub> ) <sub>3</sub> | S <sub>2</sub> O <sub>8</sub> | 3.861778 | S <sub>2</sub> O <sub>8</sub> + Fe(ClO <sub>4</sub> ) <sub>3</sub> | α-phenylacetog | cis-aconitate |
| 5  | Fe Sulfide                         | S <sub>2</sub> O <sub>8</sub> | 7.596838 | S <sub>2</sub> O <sub>8</sub> + FeS                                | α-phenylacetog | cis-aconitate |
| 6  | Fe Acetate                         | S <sub>2</sub> O <sub>8</sub> | 2.050336 | S <sub>2</sub> O <sub>8</sub> + FeAc                               | α-phenylacetog | cis-aconitate |
| 7  | Ferrocene                          | S <sub>2</sub> O <sub>8</sub> | 4.206617 | S <sub>2</sub> O <sub>8</sub> + Ferrocene                          | α-phenylacetog | cis-aconitate |
| 8  | control                            | S <sub>2</sub> O <sub>8</sub> | 8.369609 | S <sub>2</sub> O <sub>8</sub> + control                            | α-phenylacetog | cis-aconitate |
| 9  | FeCl <sub>2</sub>                  | control                       | 1.747044 | control + FeCl <sub>2</sub>                                        | α-phenylacetog | cis-aconitate |
| 10 | FeCl <sub>3</sub>                  | control                       | 0.002077 | control + FeCl <sub>3</sub>                                        | α-phenylacetog | cis-aconitate |
| 11 | Fe(ClO <sub>4</sub> ) <sub>2</sub> | control                       | -0.30952 | control + Fe(ClO <sub>4</sub> ) <sub>2</sub>                       | α-phenylacetog | cis-aconitate |
| 12 | Fe(ClO <sub>4</sub> ) <sub>3</sub> | control                       | 0.16411  | control + Fe(ClO <sub>4</sub> ) <sub>3</sub>                       | α-phenylacetog | cis-aconitate |
| 13 | Fe Sulfide                         | control                       | 0.251358 | control + FeS                                                      | α-phenylacetog | cis-aconitate |
| 14 | Fe Acetate                         | control                       | -0.48402 | control + FeAc                                                     | α-phenylacetog | cis-aconitate |
| 15 | Ferrocene                          | control                       | -0.49648 | control + Ferrocene                                                | α-phenylacetog | cis-aconitate |
| 16 | control                            | control                       | 0.484021 | control + control                                                  | α-phenylacetog | cis-aconitate |
| 17 | FeCl <sub>2</sub>                  | SO <sub>4</sub>               | 1.111378 | SO <sub>4</sub> + FeCl <sub>2</sub>                                | α-phenylacetog | cis-aconitate |
| 18 | FeCl <sub>3</sub>                  | SO <sub>4</sub>               | -0.18488 | SO <sub>4</sub> + FeCl <sub>3</sub>                                | α-phenylacetog | cis-aconitate |
| 19 | Fe(ClO <sub>4</sub> ) <sub>2</sub> | SO <sub>4</sub>               | -0.75407 | SO <sub>4</sub> + Fe(ClO <sub>4</sub> ) <sub>2</sub>               | α-phenylacetog | cis-aconitate |
| 20 | Fe(ClO <sub>4</sub> ) <sub>3</sub> | SO <sub>4</sub>               | -0.76654 | SO <sub>4</sub> + Fe(ClO <sub>4</sub> ) <sub>3</sub>               | α-phenylacetog | cis-aconitate |
| 21 | Fe Sulfide                         | SO <sub>4</sub>               | -0.02701 | SO <sub>4</sub> + FeS                                              | α-phenylacetog | cis-aconitate |
| 22 | Fe Acetate                         | SO <sub>4</sub>               | 0.808086 | SO <sub>4</sub> + FeAc                                             | α-phenylacetog | cis-aconitate |
| 23 | Ferrocene                          | SO <sub>4</sub>               | -0.44247 | SO <sub>4</sub> + Ferrocene                                        | α-phenylacetog | cis-aconitate |
| 24 | control                            | SO <sub>4</sub>               | 0.143337 | SO <sub>4</sub> + control                                          | α-phenylacetog | cis-aconitate |
| 25 | FeCl <sub>2</sub>                  | SO <sub>3</sub>               | -0.52141 | SO <sub>3</sub> + FeCl <sub>2</sub>                                | α-phenylacetog | cis-aconitate |
| 26 | FeCl <sub>3</sub>                  | SO <sub>3</sub>               | 0.442474 | SO <sub>3</sub> + FeCl <sub>3</sub>                                | α-phenylacetog | cis-aconitate |
| 27 | Fe(ClO <sub>4</sub> ) <sub>2</sub> | SO <sub>3</sub>               | -0.46325 | SO <sub>3</sub> + Fe(ClO <sub>4</sub> ) <sub>2</sub>               | α-phenylacetog | cis-aconitate |
| 28 | Fe(ClO <sub>4</sub> ) <sub>3</sub> | SO <sub>3</sub>               | 0.014541 | SO <sub>3</sub> + Fe(ClO <sub>4</sub> ) <sub>3</sub>               | α-phenylacetog | cis-aconitate |
| 29 | Fe Sulfide                         | SO <sub>3</sub>               | -0.87041 | SO <sub>3</sub> + FeS                                              | α-phenylacetog | cis-aconitate |
| 30 | Fe Acetate                         | SO <sub>3</sub>               | -0.50895 | SO <sub>3</sub> + FeAc                                             | α-phenylacetog | cis-aconitate |
| 31 | Ferrocene                          | SO <sub>3</sub>               | -1.13215 | SO <sub>3</sub> + Ferrocene                                        | α-phenylacetog | cis-aconitate |
| 32 | control                            | SO <sub>3</sub>               | 0.326143 | SO <sub>3</sub> + control                                          | α-phenylacetog | cis-aconitate |
| 33 | FeCl <sub>2</sub>                  | HSO <sub>3</sub>              | -0.38015 | HSO <sub>3</sub> + FeCl <sub>2</sub>                               | α-phenylacetog | cis-aconitate |
| 34 | FeCl <sub>3</sub>                  | HSO <sub>3</sub>              | -0.20981 | HSO <sub>3</sub> + FeCl <sub>3</sub>                               | α-phenylacetog | cis-aconitate |
| 35 | Fe(ClO <sub>4</sub> ) <sub>2</sub> | HSO <sub>3</sub>              | -0.04778 | HSO <sub>3</sub> + Fe(ClO <sub>4</sub> ) <sub>2</sub>              | α-phenylacetog | cis-aconitate |
| 36 | Fe(ClO <sub>4</sub> ) <sub>3</sub> | HSO <sub>3</sub>              | -0.15996 | HSO <sub>3</sub> + Fe(ClO <sub>4</sub> ) <sub>3</sub>              | α-phenylacetog | cis-aconitate |
| 37 | Fe Sulfide                         | HSO <sub>3</sub>              | 0.189038 | HSO <sub>3</sub> + FeS                                             | α-phenylacetog | cis-aconitate |
| 38 | Fe Acetate                         | HSO <sub>3</sub>              | -0.54634 | HSO <sub>3</sub> + FeAc                                            | α-phenylacetog | cis-aconitate |
| 39 | Ferrocene                          | HSO <sub>3</sub>              | 0.604506 | HSO <sub>3</sub> + Ferrocene                                       | α-phenylacetog | cis-aconitate |
| 40 | control                            | HSO <sub>3</sub>              | 1.065676 | HSO <sub>3</sub> + control                                         | α-phenylacetog | cis-aconitate |
| 41 | FeCl <sub>2</sub>                  | DMSO                          | -0.17242 | DMSO + FeCl <sub>2</sub>                                           | α-phenylacetog | cis-aconitate |
| 42 | FeCl <sub>3</sub>                  | DMSO                          | -0.24305 | DMSO + FeCl <sub>3</sub>                                           | α-phenylacetog | cis-aconitate |
| 43 | Fe(ClO <sub>4</sub> ) <sub>2</sub> | DMSO                          | 1.489454 | DMSO + Fe(ClO <sub>4</sub> ) <sub>2</sub>                          | α-phenylacetog | cis-aconitate |
| 44 | Fe(ClO <sub>4</sub> ) <sub>3</sub> | DMSO                          | -0.29291 | DMSO + Fe(ClO <sub>4</sub> ) <sub>3</sub>                          | α-phenylacetog | cis-aconitate |
| 45 | Fe Sulfide                         | DMSO                          | 0.903644 | DMSO + FeS                                                         | α-phenylacetog | cis-aconitate |
| 46 | Fe Acetate                         | DMSO                          | -0.05609 | DMSO + FeAc                                                        | α-phenylacetog | cis-aconitate |

|    |                                    |             |          |                                                                     |
|----|------------------------------------|-------------|----------|---------------------------------------------------------------------|
| 47 | Ferrocene                          | DMSO        | 0.396772 | DMSO + Fe alphaketog cis-aconitate                                  |
| 48 | control                            | DMSO        | 0.027005 | DMSO + co alphaketog cis-aconitate                                  |
| 49 | FeCl <sub>2</sub>                  | Cys         | -0.04778 | Cys + FeCl <sub>2</sub> alphaketog cis-aconitate                    |
| 50 | FeCl <sub>3</sub>                  | Cys         | 0.09348  | Cys + FeCl <sub>3</sub> alphaketog cis-aconitate                    |
| 51 | Fe(ClO <sub>4</sub> ) <sub>2</sub> | Cys         | 0.716683 | Cys + Fe(ClO <sub>4</sub> ) <sub>2</sub> alphaketog cis-aconitate   |
| 52 | Fe(ClO <sub>4</sub> ) <sub>3</sub> | Cys         | -0.55465 | Cys + Fe(ClO <sub>4</sub> ) <sub>3</sub> alphaketog cis-aconitate   |
| 53 | Fe Sulfide                         | Cys         | -0.03116 | Cys + Fe Sulfide alphaketog cis-aconitate                           |
| 54 | Fe Acetate                         | Cys         | -0.40508 | Cys + Fe Acetate alphaketog cis-aconitate                           |
| 55 | Ferrocene                          | Cys         | 0.795622 | Cys + Ferro alphaketog cis-aconitate                                |
| 56 | control                            | Cys         | -0.28875 | Cys + contr alphaketog cis-aconitate                                |
| 57 | FeCl <sub>2</sub>                  | Methionine  | -0.00208 | Methionine alphaketog cis-aconitate                                 |
| 58 | FeCl <sub>3</sub>                  | Methionine  | -0.65021 | Methionine alphaketog cis-aconitate                                 |
| 59 | Fe(ClO <sub>4</sub> ) <sub>2</sub> | Methionine  | -1.21109 | Methionine alphaketog cis-aconitate                                 |
| 60 | Fe(ClO <sub>4</sub> ) <sub>3</sub> | Methionine  | -0.44663 | Methionine alphaketog cis-aconitate                                 |
| 61 | Fe Sulfide                         | Methionine  | -0.14749 | Methionine alphaketog cis-aconitate                                 |
| 62 | Fe Acetate                         | Methionine  | -0.5588  | Methionine alphaketog cis-aconitate                                 |
| 63 | Ferrocene                          | Methionine  | 0.272132 | Methionine alphaketog cis-aconitate                                 |
| 64 | control                            | Methionine  | -0.08102 | Methionine alphaketog cis-aconitate                                 |
| 65 | FeCl <sub>2</sub>                  | Homocyste   | 0.708373 | Homocyste alphaketog cis-aconitate                                  |
| 66 | FeCl <sub>3</sub>                  | Homocyste   | 0.479866 | Homocyste alphaketog cis-aconitate                                  |
| 67 | Fe(ClO <sub>4</sub> ) <sub>2</sub> | Homocyste   | 0.201502 | Homocyste alphaketog cis-aconitate                                  |
| 68 | Fe(ClO <sub>4</sub> ) <sub>3</sub> | Homocyste   | -0.91611 | Homocyste alphaketog cis-aconitate                                  |
| 69 | Fe Sulfide                         | Homocyste   | -0.23889 | Homocyste alphaketog cis-aconitate                                  |
| 70 | Fe Acetate                         | Homocyste   | 0.110099 | Homocyste alphaketog cis-aconitate                                  |
| 71 | Ferrocene                          | Homocyste   | 0.400927 | Homocyste alphaketog cis-aconitate                                  |
| 72 | control                            | Homocyste   | -0.18488 | Homocyste alphaketog cis-aconitate                                  |
| 73 | FeCl <sub>2</sub>                  | DL-Ethionir | -0.50895 | DL-Ethionir alphaketog cis-aconitate                                |
| 74 | FeCl <sub>3</sub>                  | DL-Ethionir | -0.34276 | DL-Ethionir alphaketog cis-aconitate                                |
| 75 | Fe(ClO <sub>4</sub> ) <sub>2</sub> | DL-Ethionir | -0.51726 | DL-Ethionir alphaketog cis-aconitate                                |
| 76 | Fe(ClO <sub>4</sub> ) <sub>3</sub> | DL-Ethionir | 0.243049 | DL-Ethionir alphaketog cis-aconitate                                |
| 77 | Fe Sulfide                         | DL-Ethionir | 1.464526 | DL-Ethionir alphaketog cis-aconitate                                |
| 78 | Fe Acetate                         | DL-Ethionir | 0.230585 | DL-Ethionir alphaketog cis-aconitate                                |
| 79 | Ferrocene                          | DL-Ethionir | 0.10179  | DL-Ethionir alphaketog cis-aconitate                                |
| 80 | control                            | DL-Ethionir | 0.392618 | DL-Ethionir alphaketog cis-aconitate                                |
| 81 | FeCl <sub>2</sub>                  | 2-Mercapt   | 1.310802 | 2-Mercapt alphaketog cis-aconitate                                  |
| 82 | FeCl <sub>3</sub>                  | 2-Mercapt   | 1.152925 | 2-Mercapt alphaketog cis-aconitate                                  |
| 83 | Fe(ClO <sub>4</sub> ) <sub>2</sub> | 2-Mercapt   | 0.675136 | 2-Mercapt alphaketog cis-aconitate                                  |
| 84 | Fe(ClO <sub>4</sub> ) <sub>3</sub> | 2-Mercapt   | -0.89949 | 2-Mercapt alphaketog cis-aconitate                                  |
| 85 | Fe Sulfide                         | 2-Mercapt   | 0.779003 | 2-Mercapt alphaketog cis-aconitate                                  |
| 86 | Fe Acetate                         | 2-Mercapt   | -0.376   | 2-Mercapt alphaketog cis-aconitate                                  |
| 87 | Ferrocene                          | 2-Mercapt   | -0.5588  | 2-Mercapt alphaketog cis-aconitate                                  |
| 88 | control                            | 2-Mercapt   | -0.5131  | 2-Mercapt alphaketog cis-aconitate                                  |
| 89 | FeCl <sub>2</sub>                  | S2O8        | 0.410674 | S2O8 + FeC cisaconitat cis-aconitate                                |
| 90 | FeCl <sub>3</sub>                  | S2O8        | 0.960414 | S2O8 + FeC cisaconitat cis-aconitate                                |
| 91 | Fe(ClO <sub>4</sub> ) <sub>2</sub> | S2O8        | 0.440256 | S2O8 + Fe(ClO <sub>4</sub> ) <sub>2</sub> cisaconitat cis-aconitate |
| 92 | Fe(ClO <sub>4</sub> ) <sub>3</sub> | S2O8        | 0.700389 | S2O8 + Fe(ClO <sub>4</sub> ) <sub>3</sub> cisaconitat cis-aconitate |
| 93 | Fe Sulfide                         | S2O8        | -5.65962 | S2O8 + Fe Sulfide cisaconitat cis-aconitate                         |

|     |            |         |          |             |             |               |
|-----|------------|---------|----------|-------------|-------------|---------------|
| 94  | Fe Acetate | S2O8    | -0.61579 | S2O8 + Fe   | cisaconitat | cis-aconitate |
| 95  | Ferrocene  | S2O8    | -3.77594 | S2O8 + Fer  | cisaconitat | cis-aconitate |
| 96  | control    | S2O8    | -5.79368 | S2O8 + con  | cisaconitat | cis-aconitate |
| 97  | FeCl2      | control | -1.2616  | control + F | cisaconitat | cis-aconitate |
| 98  | FeCl3      | control | -0.47222 | control + F | cisaconitat | cis-aconitate |
| 99  | Fe(ClO4)2  | control | -0.04697 | control + F | cisaconitat | cis-aconitate |
| 100 | Fe(ClO4)3  | control | -0.35674 | control + F | cisaconitat | cis-aconitate |
| 101 | Fe Sulfide | control | 0.026125 | control + F | cisaconitat | cis-aconitate |
| 102 | Fe Acetate | control | -0.469   | control + F | cisaconitat | cis-aconitate |
| 103 | Ferrocene  | control | -0.84146 | control + F | cisaconitat | cis-aconitate |
| 104 | control    | control | 0.556014 | control + c | cisaconitat | cis-aconitate |
| 105 | FeCl2      | SO4     | -0.15333 | SO4 + FeCl  | cisaconitat | cis-aconitate |
| 106 | FeCl3      | SO4     | -0.0327  | SO4 + FeCl  | cisaconitat | cis-aconitate |
| 107 | Fe(ClO4)2  | SO4     | -0.54888 | SO4 + Fe(C  | cisaconitat | cis-aconitate |
| 108 | Fe(ClO4)3  | SO4     | -0.14324 | SO4 + Fe(C  | cisaconitat | cis-aconitate |
| 109 | Fe Sulfide | SO4     | 0.33714  | SO4 + Fe S  | cisaconitat | cis-aconitate |
| 110 | Fe Acetate | SO4     | 0.55139  | SO4 + Fe A  | cisaconitat | cis-aconitate |
| 111 | Ferrocene  | SO4     | -0.092   | SO4 + Ferr  | cisaconitat | cis-aconitate |
| 112 | control    | SO4     | 0.046521 | SO4 + cont  | cisaconitat | cis-aconitate |
| 113 | FeCl2      | SO3     | -0.04867 | SO3 + FeCl  | cisaconitat | cis-aconitate |
| 114 | FeCl3      | SO3     | 0.123419 | SO3 + FeCl  | cisaconitat | cis-aconitate |
| 115 | Fe(ClO4)2  | SO3     | -0.62502 | SO3 + Fe(C  | cisaconitat | cis-aconitate |
| 116 | Fe(ClO4)3  | SO3     | -0.70772 | SO3 + Fe(C  | cisaconitat | cis-aconitate |
| 117 | Fe Sulfide | SO3     | 0.231704 | SO3 + Fe S  | cisaconitat | cis-aconitate |
| 118 | Fe Acetate | SO3     | 0.814373 | SO3 + Fe A  | cisaconitat | cis-aconitate |
| 119 | Ferrocene  | SO3     | -0.41984 | SO3 + Ferr  | cisaconitat | cis-aconitate |
| 120 | control    | SO3     | 0.354359 | SO3 + cont  | cisaconitat | cis-aconitate |
| 121 | FeCl2      | HSO3    | -0.11022 | HSO3 + FeC  | cisaconitat | cis-aconitate |
| 122 | FeCl3      | HSO3    | -0.79936 | HSO3 + FeC  | cisaconitat | cis-aconitate |
| 123 | Fe(ClO4)2  | HSO3    | -0.67808 | HSO3 + Fe(  | cisaconitat | cis-aconitate |
| 124 | Fe(ClO4)3  | HSO3    | -1.48781 | HSO3 + Fe(  | cisaconitat | cis-aconitate |
| 125 | Fe Sulfide | HSO3    | 0.247211 | HSO3 + Fe   | cisaconitat | cis-aconitate |
| 126 | Fe Acetate | HSO3    | 1.398319 | HSO3 + Fe   | cisaconitat | cis-aconitate |
| 127 | Ferrocene  | HSO3    | -0.38165 | HSO3 + Fer  | cisaconitat | cis-aconitate |
| 128 | control    | HSO3    | 0.463875 | HSO3 + cor  | cisaconitat | cis-aconitate |
| 129 | FeCl2      | DMSO    | -0.3824  | DMSO + Fe   | cisaconitat | cis-aconitate |
| 130 | FeCl3      | DMSO    | 0.324388 | DMSO + Fe   | cisaconitat | cis-aconitate |
| 131 | Fe(ClO4)2  | DMSO    | -0.48159 | DMSO + Fe   | cisaconitat | cis-aconitate |
| 132 | Fe(ClO4)3  | DMSO    | 0.63998  | DMSO + Fe   | cisaconitat | cis-aconitate |
| 133 | Fe Sulfide | DMSO    | 0.776197 | DMSO + Fe   | cisaconitat | cis-aconitate |
| 134 | Fe Acetate | DMSO    | 0.484099 | DMSO + Fe   | cisaconitat | cis-aconitate |
| 135 | Ferrocene  | DMSO    | -0.05765 | DMSO + Fe   | cisaconitat | cis-aconitate |
| 136 | control    | DMSO    | 0.015289 | DMSO + co   | cisaconitat | cis-aconitate |
| 137 | FeCl2      | Cys     | 0.553694 | Cys + FeCl2 | cisaconitat | cis-aconitate |
| 138 | FeCl3      | Cys     | -0.56881 | Cys + FeCl3 | cisaconitat | cis-aconitate |
| 139 | Fe(ClO4)2  | Cys     | 0.099395 | Cys + Fe(Cl | cisaconitat | cis-aconitate |
| 140 | Fe(ClO4)3  | Cys     | -0.828   | Cys + Fe(Cl | cisaconitat | cis-aconitate |

|     |            |             |          |             |             |               |
|-----|------------|-------------|----------|-------------|-------------|---------------|
| 141 | Fe Sulfide | Cys         | -0.01529 | Cys + Fe Su | cisaconitat | cis-aconitate |
| 142 | Fe Acetate | Cys         | -0.89809 | Cys + Fe Ac | cisaconitat | cis-aconitate |
| 143 | Ferrocene  | Cys         | 0.168912 | Cys + Ferro | cisaconitat | cis-aconitate |
| 144 | control    | Cys         | 0.429466 | Cys + contr | cisaconitat | cis-aconitate |
| 145 | FeCl2      | Methionine  | -0.2419  | Methionine  | cisaconitat | cis-aconitate |
| 146 | FeCl3      | Methionine  | -0.01926 | Methionine  | cisaconitat | cis-aconitate |
| 147 | Fe(ClO4)2  | Methionine  | 0.257814 | Methionine  | cisaconitat | cis-aconitate |
| 148 | Fe(ClO4)3  | Methionine  | 0.043703 | Methionine  | cisaconitat | cis-aconitate |
| 149 | Fe Sulfide | Methionine  | 0.602022 | Methionine  | cisaconitat | cis-aconitate |
| 150 | Fe Acetate | Methionine  | 1.331308 | Methionine  | cisaconitat | cis-aconitate |
| 151 | Ferrocene  | Methionine  | 0.325696 | Methionine  | cisaconitat | cis-aconitate |
| 152 | control    | Methionine  | 0.812863 | Methionine  | cisaconitat | cis-aconitate |
| 153 | FeCl2      | Homocyste   | -1.3213  | Homocyste   | cisaconitat | cis-aconitate |
| 154 | FeCl3      | Homocyste   | 0.785071 | Homocyste   | cisaconitat | cis-aconitate |
| 155 | Fe(ClO4)2  | Homocyste   | -2.96398 | Homocyste   | cisaconitat | cis-aconitate |
| 156 | Fe(ClO4)3  | Homocyste   | 0.32456  | Homocyste   | cisaconitat | cis-aconitate |
| 157 | Fe Sulfide | Homocyste   | -0.04582 | Homocyste   | cisaconitat | cis-aconitate |
| 158 | Fe Acetate | Homocyste   | 1.222042 | Homocyste   | cisaconitat | cis-aconitate |
| 159 | Ferrocene  | Homocyste   | -0.12976 | Homocyste   | cisaconitat | cis-aconitate |
| 160 | control    | Homocyste   | -0.01534 | Homocyste   | cisaconitat | cis-aconitate |
| 161 | FeCl2      | DL-Ethionir | -0.36183 | DL-Ethionir | cisaconitat | cis-aconitate |
| 162 | FeCl3      | DL-Ethionir | 0.479226 | DL-Ethionir | cisaconitat | cis-aconitate |
| 163 | Fe(ClO4)2  | DL-Ethionir | 0.231564 | DL-Ethionir | cisaconitat | cis-aconitate |
| 164 | Fe(ClO4)3  | DL-Ethionir | -0.01875 | DL-Ethionir | cisaconitat | cis-aconitate |
| 165 | Fe Sulfide | DL-Ethionir | -0.17042 | DL-Ethionir | cisaconitat | cis-aconitate |
| 166 | Fe Acetate | DL-Ethionir | 0.748016 | DL-Ethionir | cisaconitat | cis-aconitate |
| 167 | Ferrocene  | DL-Ethionir | 0.333154 | DL-Ethionir | cisaconitat | cis-aconitate |
| 168 | control    | DL-Ethionir | 0.424251 | DL-Ethionir | cisaconitat | cis-aconitate |
| 169 | FeCl2      | 2-Mercapt   | -1.4636  | 2-Mercapt   | cisaconitat | cis-aconitate |
| 170 | FeCl3      | 2-Mercapt   | -1.12996 | 2-Mercapt   | cisaconitat | cis-aconitate |
| 171 | Fe(ClO4)2  | 2-Mercapt   | -0.78565 | 2-Mercapt   | cisaconitat | cis-aconitate |
| 172 | Fe(ClO4)3  | 2-Mercapt   | -1.58004 | 2-Mercapt   | cisaconitat | cis-aconitate |
| 173 | Fe Sulfide | 2-Mercapt   | 0.209424 | 2-Mercapt   | cisaconitat | cis-aconitate |
| 174 | Fe Acetate | 2-Mercapt   | -0.39585 | 2-Mercapt   | cisaconitat | cis-aconitate |
| 175 | Ferrocene  | 2-Mercapt   | 1.343623 | 2-Mercapt   | cisaconitat | cis-aconitate |
| 176 | control    | 2-Mercapt   | 0.957362 | 2-Mercapt   | cisaconitat | cis-aconitate |
| 177 | FeCl2      | S2O8        | 0.025158 | S2O8 + FeC  | citrate     | cis-aconitate |
| 178 | FeCl3      | S2O8        | 0.125789 | S2O8 + FeC  | citrate     | cis-aconitate |
| 179 | Fe(ClO4)2  | S2O8        | -0.6541  | S2O8 + Fe(  | citrate     | cis-aconitate |
| 180 | Fe(ClO4)3  | S2O8        | -0.13418 | S2O8 + Fe(  | citrate     | cis-aconitate |
| 181 | Fe Sulfide | S2O8        | 0.415105 | S2O8 + Fe   | citrate     | cis-aconitate |
| 182 | Fe Acetate | S2O8        | -0.02516 | S2O8 + Fe   | citrate     | cis-aconitate |
| 183 | Ferrocene  | S2O8        | 0.247386 | S2O8 + Fer  | citrate     | cis-aconitate |
| 184 | control    | S2O8        | 0.503157 | S2O8 + con  | citrate     | cis-aconitate |
| 185 | FeCl2      | control     | 0.675069 | control + F | citrate     | cis-aconitate |
| 186 | FeCl3      | control     | -0.79247 | control + F | citrate     | cis-aconitate |
| 187 | Fe(ClO4)2  | control     | -0.41091 | control + F | citrate     | cis-aconitate |

|     |            |            |          |                            |               |
|-----|------------|------------|----------|----------------------------|---------------|
| 188 | Fe(ClO4)3  | control    | 0.058702 | control + Fe citrate       | cis-aconitate |
| 189 | Fe Sulfide | control    | 0.389947 | control + Fe citrate       | cis-aconitate |
| 190 | Fe Acetate | control    | -0.10063 | control + Fe citrate       | cis-aconitate |
| 191 | Ferrocene  | control    | 0.213842 | control + Fe citrate       | cis-aconitate |
| 192 | control    | control    | 0.301894 | control + Fe citrate       | cis-aconitate |
| 193 | FeCl2      | SO4        | -0.03354 | SO4 + FeCl2 citrate        | cis-aconitate |
| 194 | FeCl3      | SO4        | 0.922454 | SO4 + FeCl3 citrate        | cis-aconitate |
| 195 | Fe(ClO4)2  | SO4        | -0.08805 | SO4 + Fe(ClO4)2 citrate    | cis-aconitate |
| 196 | Fe(ClO4)3  | SO4        | -0.95181 | SO4 + Fe(ClO4)3 citrate    | cis-aconitate |
| 197 | Fe Sulfide | SO4        | 0.029351 | SO4 + Fe Sulfide citrate   | cis-aconitate |
| 198 | Fe Acetate | SO4        | 0.515736 | SO4 + Fe Acetate citrate   | cis-aconitate |
| 199 | Ferrocene  | SO4        | -1.23693 | SO4 + Ferrocene citrate    | cis-aconitate |
| 200 | control    | SO4        | -0.58702 | SO4 + control citrate      | cis-aconitate |
| 201 | FeCl2      | SO3        | -0.3606  | SO3 + FeCl2 citrate        | cis-aconitate |
| 202 | FeCl3      | SO3        | 0.66249  | SO3 + FeCl3 citrate        | cis-aconitate |
| 203 | Fe(ClO4)2  | SO3        | 0.19707  | SO3 + Fe(ClO4)2 citrate    | cis-aconitate |
| 204 | Fe(ClO4)3  | SO3        | -0.30609 | SO3 + Fe(ClO4)3 citrate    | cis-aconitate |
| 205 | Fe Sulfide | SO3        | -0.58282 | SO3 + Fe Sulfide citrate   | cis-aconitate |
| 206 | Fe Acetate | SO3        | 0.469613 | SO3 + Fe Acetate citrate   | cis-aconitate |
| 207 | Ferrocene  | SO3        | 0.247386 | SO3 + Ferrocene citrate    | cis-aconitate |
| 208 | control    | SO3        | -0.24319 | SO3 + control citrate      | cis-aconitate |
| 209 | FeCl2      | HSO3       | 0.389947 | HSO3 + FeCl2 citrate       | cis-aconitate |
| 210 | FeCl3      | HSO3       | -0.20546 | HSO3 + FeCl3 citrate       | cis-aconitate |
| 211 | Fe(ClO4)2  | HSO3       | -1.10695 | HSO3 + Fe(ClO4)2 citrate   | cis-aconitate |
| 212 | Fe(ClO4)3  | HSO3       | -0.21803 | HSO3 + Fe(ClO4)3 citrate   | cis-aconitate |
| 213 | Fe Sulfide | HSO3       | -1.09856 | HSO3 + Fe Sulfide citrate  | cis-aconitate |
| 214 | Fe Acetate | HSO3       | 0.167719 | HSO3 + Fe Acetate citrate  | cis-aconitate |
| 215 | Ferrocene  | HSO3       | -1.05663 | HSO3 + Ferrocene citrate   | cis-aconitate |
| 216 | control    | HSO3       | 0.771507 | HSO3 + control citrate     | cis-aconitate |
| 217 | FeCl2      | DMSO       | 0.578631 | DMSO + FeCl2 citrate       | cis-aconitate |
| 218 | FeCl3      | DMSO       | 0.524122 | DMSO + FeCl3 citrate       | cis-aconitate |
| 219 | Fe(ClO4)2  | DMSO       | 0.285122 | DMSO + Fe(ClO4)2 citrate   | cis-aconitate |
| 220 | Fe(ClO4)3  | DMSO       | -0.42349 | DMSO + Fe(ClO4)3 citrate   | cis-aconitate |
| 221 | Fe Sulfide | DMSO       | -0.38156 | DMSO + Fe Sulfide citrate  | cis-aconitate |
| 222 | Fe Acetate | DMSO       | -0.64153 | DMSO + Fe Acetate citrate  | cis-aconitate |
| 223 | Ferrocene  | DMSO       | 0.888911 | DMSO + Ferrocene citrate   | cis-aconitate |
| 224 | control    | DMSO       | 0.301894 | DMSO + control citrate     | cis-aconitate |
| 225 | FeCl2      | Cys        | 0.490578 | Cys + FeCl2 citrate        | cis-aconitate |
| 226 | FeCl3      | Cys        | -1.0734  | Cys + FeCl3 citrate        | cis-aconitate |
| 227 | Fe(ClO4)2  | Cys        | -0.31028 | Cys + Fe(ClO4)2 citrate    | cis-aconitate |
| 228 | Fe(ClO4)3  | Cys        | -0.97277 | Cys + Fe(ClO4)3 citrate    | cis-aconitate |
| 229 | Fe Sulfide | Cys        | -0.57863 | Cys + Fe Sulfide citrate   | cis-aconitate |
| 230 | Fe Acetate | Cys        | 0.171912 | Cys + Fe Acetate citrate   | cis-aconitate |
| 231 | Ferrocene  | Cys        | -0.83859 | Cys + Ferrocene citrate    | cis-aconitate |
| 232 | control    | Cys        | 0.461227 | Cys + control citrate      | cis-aconitate |
| 233 | FeCl2      | Methionine | -0.0587  | Methionine + FeCl2 citrate | cis-aconitate |
| 234 | FeCl3      | Methionine | -0.24319 | Methionine + FeCl3 citrate | cis-aconitate |

|     |            |             |          |                       |               |
|-----|------------|-------------|----------|-----------------------|---------------|
| 235 | Fe(ClO4)2  | Methionine  | -0.63314 | Methionine citrate    | cis-aconitate |
| 236 | Fe(ClO4)3  | Methionine  | -0.44865 | Methionine citrate    | cis-aconitate |
| 237 | Fe Sulfide | Methionine  | -0.10902 | Methionine citrate    | cis-aconitate |
| 238 | Fe Acetate | Methionine  | -1.29144 | Methionine citrate    | cis-aconitate |
| 239 | Ferrocene  | Methionine  | 0.708613 | Methionine citrate    | cis-aconitate |
| 240 | control    | Methionine  | 0.679262 | Methionine citrate    | cis-aconitate |
| 241 | FeCl2      | Homocyste   | 0.339631 | Homocyste citrate     | cis-aconitate |
| 242 | FeCl3      | Homocyste   | -0.02516 | Homocyste citrate     | cis-aconitate |
| 243 | Fe(ClO4)2  | Homocyste   | -0.54509 | Homocyste citrate     | cis-aconitate |
| 244 | Fe(ClO4)3  | Homocyste   | 0.582824 | Homocyste citrate     | cis-aconitate |
| 245 | Fe Sulfide | Homocyste   | -1.64784 | Homocyste citrate     | cis-aconitate |
| 246 | Fe Acetate | Homocyste   | 0.800858 | Homocyste citrate     | cis-aconitate |
| 247 | Ferrocene  | Homocyste   | 0.050316 | Homocyste citrate     | cis-aconitate |
| 248 | control    | Homocyste   | 0.15514  | Homocyste citrate     | cis-aconitate |
| 249 | FeCl2      | DL-Ethionir | -0.6583  | DL-Ethionir citrate   | cis-aconitate |
| 250 | FeCl3      | DL-Ethionir | 0.398333 | DL-Ethionir citrate   | cis-aconitate |
| 251 | Fe(ClO4)2  | DL-Ethionir | -0.87214 | DL-Ethionir citrate   | cis-aconitate |
| 252 | Fe(ClO4)3  | DL-Ethionir | 0.117403 | DL-Ethionir citrate   | cis-aconitate |
| 253 | Fe Sulfide | DL-Ethionir | -1.43819 | DL-Ethionir citrate   | cis-aconitate |
| 254 | Fe Acetate | DL-Ethionir | 0.687648 | DL-Ethionir citrate   | cis-aconitate |
| 255 | Ferrocene  | DL-Ethionir | -0.61217 | DL-Ethionir citrate   | cis-aconitate |
| 256 | control    | DL-Ethionir | -0.85537 | DL-Ethionir citrate   | cis-aconitate |
| 257 | FeCl2      | 2-Mercapt   | 0.096438 | 2-Mercapt citrate     | cis-aconitate |
| 258 | FeCl3      | 2-Mercapt   | 0.431876 | 2-Mercapt citrate     | cis-aconitate |
| 259 | Fe(ClO4)2  | 2-Mercapt   | -0.2977  | 2-Mercapt citrate     | cis-aconitate |
| 260 | Fe(ClO4)3  | 2-Mercapt   | 1.756857 | 2-Mercapt citrate     | cis-aconitate |
| 261 | Fe Sulfide | 2-Mercapt   | -0.239   | 2-Mercapt citrate     | cis-aconitate |
| 262 | Fe Acetate | 2-Mercapt   | -0.81344 | 2-Mercapt citrate     | cis-aconitate |
| 263 | Ferrocene  | 2-Mercapt   | 0.498964 | 2-Mercapt citrate     | cis-aconitate |
| 264 | control    | 2-Mercapt   | 0.054509 | 2-Mercapt citrate     | cis-aconitate |
| 265 | FeCl2      | S2O8        | -0.26648 | S2O8 + FeC fumarate   | cis-aconitate |
| 266 | FeCl3      | S2O8        | 0.344516 | S2O8 + FeC fumarate   | cis-aconitate |
| 267 | Fe(ClO4)2  | S2O8        | 0.039752 | S2O8 + Fe(i fumarate  | cis-aconitate |
| 268 | Fe(ClO4)3  | S2O8        | 0.163424 | S2O8 + Fe(i fumarate  | cis-aconitate |
| 269 | Fe Sulfide | S2O8        | 0.316542 | S2O8 + Fe ! fumarate  | cis-aconitate |
| 270 | Fe Acetate | S2O8        | -0.82596 | S2O8 + Fe , fumarate  | cis-aconitate |
| 271 | Ferrocene  | S2O8        | 0.446104 | S2O8 + Fer fumarate   | cis-aconitate |
| 272 | control    | S2O8        | 1.373647 | S2O8 + con fumarate   | cis-aconitate |
| 273 | FeCl2      | control     | -0.22821 | control + Fi fumarate | cis-aconitate |
| 274 | FeCl3      | control     | -0.75087 | control + Fi fumarate | cis-aconitate |
| 275 | Fe(ClO4)2  | control     | -0.90988 | control + Fi fumarate | cis-aconitate |
| 276 | Fe(ClO4)3  | control     | -1.48701 | control + Fi fumarate | cis-aconitate |
| 277 | Fe Sulfide | control     | 0.207593 | control + Fi fumarate | cis-aconitate |
| 278 | Fe Acetate | control     | 0.016195 | control + Fi fumarate | cis-aconitate |
| 279 | Ferrocene  | control     | -0.26943 | control + Fi fumarate | cis-aconitate |
| 280 | control    | control     | 0.178147 | control + ci fumarate | cis-aconitate |
| 281 | FeCl2      | SO4         | 0.740562 | SO4 + FeCl: fumarate  | cis-aconitate |

|     |            |           |          |             |          |               |
|-----|------------|-----------|----------|-------------|----------|---------------|
| 282 | FeCl3      | SO4       | -1.27942 | SO4 + FeCl: | fumarate | cis-aconitate |
| 283 | Fe(ClO4)2  | SO4       | 0.419603 | SO4 + Fe(C  | fumarate | cis-aconitate |
| 284 | Fe(ClO4)3  | SO4       | -1.18372 | SO4 + Fe(C  | fumarate | cis-aconitate |
| 285 | Fe Sulfide | SO4       | -0.39899 | SO4 + Fe S: | fumarate | cis-aconitate |
| 286 | Fe Acetate | SO4       | -0.60806 | SO4 + Fe A: | fumarate | cis-aconitate |
| 287 | Ferrocene  | SO4       | -0.10453 | SO4 + Ferr: | fumarate | cis-aconitate |
| 288 | control    | SO4       | 0.627196 | SO4 + cont  | fumarate | cis-aconitate |
| 289 | FeCl2      | SO3       | 0.608056 | SO3 + FeCl: | fumarate | cis-aconitate |
| 290 | FeCl3      | SO3       | -1.06594 | SO3 + FeCl: | fumarate | cis-aconitate |
| 291 | Fe(ClO4)2  | SO3       | 0.843622 | SO3 + Fe(C  | fumarate | cis-aconitate |
| 292 | Fe(ClO4)3  | SO3       | -1.07919 | SO3 + Fe(C  | fumarate | cis-aconitate |
| 293 | Fe Sulfide | SO3       | 0.343044 | SO3 + Fe S: | fumarate | cis-aconitate |
| 294 | Fe Acetate | SO3       | 0.206121 | SO3 + Fe A: | fumarate | cis-aconitate |
| 295 | Ferrocene  | SO3       | 0.26354  | SO3 + Ferr: | fumarate | cis-aconitate |
| 296 | control    | SO3       | -0.26648 | SO3 + cont  | fumarate | cis-aconitate |
| 297 | FeCl2      | HSO3      | -1.84625 | HSO3 + FeCl | fumarate | cis-aconitate |
| 298 | FeCl3      | HSO3      | -1.25145 | HSO3 + FeCl | fumarate | cis-aconitate |
| 299 | Fe(ClO4)2  | HSO3      | -1.42665 | HSO3 + Fe(  | fumarate | cis-aconitate |
| 300 | Fe(ClO4)3  | HSO3      | -0.56978 | HSO3 + Fe(  | fumarate | cis-aconitate |
| 301 | Fe Sulfide | HSO3      | -0.21054 | HSO3 + Fe : | fumarate | cis-aconitate |
| 302 | Fe Acetate | HSO3      | -0.42255 | HSO3 + Fe : | fumarate | cis-aconitate |
| 303 | Ferrocene  | HSO3      | 0.471133 | HSO3 + Fer  | fumarate | cis-aconitate |
| 304 | control    | HSO3      | -0.11042 | HSO3 + cor  | fumarate | cis-aconitate |
| 305 | FeCl2      | DMSO      | -1.37659 | DMSO + Fe   | fumarate | cis-aconitate |
| 306 | FeCl3      | DMSO      | -2.45578 | DMSO + Fe   | fumarate | cis-aconitate |
| 307 | Fe(ClO4)2  | DMSO      | 0.345988 | DMSO + Fe   | fumarate | cis-aconitate |
| 308 | Fe(ClO4)3  | DMSO      | -1.88453 | DMSO + Fe   | fumarate | cis-aconitate |
| 309 | Fe Sulfide | DMSO      | 1.017353 | DMSO + Fe   | fumarate | cis-aconitate |
| 310 | Fe Acetate | DMSO      | 0.979073 | DMSO + Fe   | fumarate | cis-aconitate |
| 311 | Ferrocene  | DMSO      | 0.70081  | DMSO + Fe   | fumarate | cis-aconitate |
| 312 | control    | DMSO      | -0.45641 | DMSO + co   | fumarate | cis-aconitate |
| 313 | FeCl2      | Cys       | 0.419603 | Cys + FeCl2 | fumarate | cis-aconitate |
| 314 | FeCl3      | Cys       | 2.086236 | Cys + FeCl3 | fumarate | cis-aconitate |
| 315 | Fe(ClO4)2  | Cys       | 0.260595 | Cys + Fe(Cl | fumarate | cis-aconitate |
| 316 | Fe(ClO4)3  | Cys       | 0.577138 | Cys + Fe(Cl | fumarate | cis-aconitate |
| 317 | Fe Sulfide | Cys       | -0.1649  | Cys + Fe Su | fumarate | cis-aconitate |
| 318 | Fe Acetate | Cys       | 0.153118 | Cys + Fe Ac | fumarate | cis-aconitate |
| 319 | Ferrocene  | Cys       | -0.0162  | Cys + Ferro | fumarate | cis-aconitate |
| 320 | control    | Cys       | -0.34304 | Cys + contr | fumarate | cis-aconitate |
| 321 | FeCl2      | Methionin | -0.22821 | Methionin   | fumarate | cis-aconitate |
| 322 | FeCl3      | Methionin | -1.64602 | Methionin   | fumarate | cis-aconitate |
| 323 | Fe(ClO4)2  | Methionin | 0.132506 | Methionin   | fumarate | cis-aconitate |
| 324 | Fe(ClO4)3  | Methionin | -2.00084 | Methionin   | fumarate | cis-aconitate |
| 325 | Fe Sulfide | Methionin | -0.40046 | Methionin   | fumarate | cis-aconitate |
| 326 | Fe Acetate | Methionin | 0.1222   | Methionin   | fumarate | cis-aconitate |
| 327 | Ferrocene  | Methionin | 0.945211 | Methionin   | fumarate | cis-aconitate |
| 328 | control    | Methionin | -0.45935 | Methionin   | fumarate | cis-aconitate |

|     |                                    |                               |          |                                             |               |
|-----|------------------------------------|-------------------------------|----------|---------------------------------------------|---------------|
| 329 | FeCl <sub>2</sub>                  | Homocyste                     | 0.952572 | Homocyste fumarate                          | cis-aconitate |
| 330 | FeCl <sub>3</sub>                  | Homocyste                     | -3.03881 | Homocyste fumarate                          | cis-aconitate |
| 331 | Fe(ClO <sub>4</sub> ) <sub>2</sub> | Homocyste                     | 1.114524 | Homocyste fumarate                          | cis-aconitate |
| 332 | Fe(ClO <sub>4</sub> ) <sub>3</sub> | Homocyste                     | -2.93133 | Homocyste fumarate                          | cis-aconitate |
| 333 | Fe Sulfide                         | Homocyste                     | 0.976129 | Homocyste fumarate                          | cis-aconitate |
| 334 | Fe Acetate                         | Homocyste                     | 0.350405 | Homocyste fumarate                          | cis-aconitate |
| 335 | Ferrocene                          | Homocyste                     | -0.05447 | Homocyste fumarate                          | cis-aconitate |
| 336 | control                            | Homocyste                     | 0.359239 | Homocyste fumarate                          | cis-aconitate |
| 337 | FeCl <sub>2</sub>                  | DL-Ethionir                   | -0.86276 | DL-Ethionir fumarate                        | cis-aconitate |
| 338 | FeCl <sub>3</sub>                  | DL-Ethionir                   | -1.57388 | DL-Ethionir fumarate                        | cis-aconitate |
| 339 | Fe(ClO <sub>4</sub> ) <sub>2</sub> | DL-Ethionir                   | 0.113366 | DL-Ethionir fumarate                        | cis-aconitate |
| 340 | Fe(ClO <sub>4</sub> ) <sub>3</sub> | DL-Ethionir                   | -1.28825 | DL-Ethionir fumarate                        | cis-aconitate |
| 341 | Fe Sulfide                         | DL-Ethionir                   | -0.10159 | DL-Ethionir fumarate                        | cis-aconitate |
| 342 | Fe Acetate                         | DL-Ethionir                   | -0.05447 | DL-Ethionir fumarate                        | cis-aconitate |
| 343 | Ferrocene                          | DL-Ethionir                   | 0.606584 | DL-Ethionir fumarate                        | cis-aconitate |
| 344 | control                            | DL-Ethionir                   | 0.310653 | DL-Ethionir fumarate                        | cis-aconitate |
| 345 | FeCl <sub>2</sub>                  | 2-Mercapt                     | -0.14723 | 2-Mercapt fumarate                          | cis-aconitate |
| 346 | FeCl <sub>3</sub>                  | 2-Mercapt                     | 0.110422 | 2-Mercapt fumarate                          | cis-aconitate |
| 347 | Fe(ClO <sub>4</sub> ) <sub>2</sub> | 2-Mercapt                     | 0.487328 | 2-Mercapt fumarate                          | cis-aconitate |
| 348 | Fe(ClO <sub>4</sub> ) <sub>3</sub> | 2-Mercapt                     | 1.027659 | 2-Mercapt fumarate                          | cis-aconitate |
| 349 | Fe Sulfide                         | 2-Mercapt                     | 0.409297 | 2-Mercapt fumarate                          | cis-aconitate |
| 350 | Fe Acetate                         | 2-Mercapt                     | 0.325376 | 2-Mercapt fumarate                          | cis-aconitate |
| 351 | Ferrocene                          | 2-Mercapt                     | 0.848039 | 2-Mercapt fumarate                          | cis-aconitate |
| 352 | control                            | 2-Mercapt                     | 0.041224 | 2-Mercapt fumarate                          | cis-aconitate |
| 353 | FeCl <sub>2</sub>                  | S <sub>2</sub> O <sub>8</sub> | 0.1639   | S <sub>2</sub> O <sub>8</sub> + FeC malate  | cis-aconitate |
| 354 | FeCl <sub>3</sub>                  | S <sub>2</sub> O <sub>8</sub> | 0.160837 | S <sub>2</sub> O <sub>8</sub> + FeC malate  | cis-aconitate |
| 355 | Fe(ClO <sub>4</sub> ) <sub>2</sub> | S <sub>2</sub> O <sub>8</sub> | -0.09037 | S <sub>2</sub> O <sub>8</sub> + Fe(C malate | cis-aconitate |
| 356 | Fe(ClO <sub>4</sub> ) <sub>3</sub> | S <sub>2</sub> O <sub>8</sub> | 0.641815 | S <sub>2</sub> O <sub>8</sub> + Fe(C malate | cis-aconitate |
| 357 | Fe Sulfide                         | S <sub>2</sub> O <sub>8</sub> | 0.994123 | S <sub>2</sub> O <sub>8</sub> + Fe S malate | cis-aconitate |
| 358 | Fe Acetate                         | S <sub>2</sub> O <sub>8</sub> | -0.11795 | S <sub>2</sub> O <sub>8</sub> + Fe S malate | cis-aconitate |
| 359 | Ferrocene                          | S <sub>2</sub> O <sub>8</sub> | -0.10263 | S <sub>2</sub> O <sub>8</sub> + Fer malate  | cis-aconitate |
| 360 | control                            | S <sub>2</sub> O <sub>8</sub> | 0.718403 | S <sub>2</sub> O <sub>8</sub> + con malate  | cis-aconitate |
| 361 | FeCl <sub>2</sub>                  | control                       | 0.096502 | control + F malate                          | cis-aconitate |
| 362 | FeCl <sub>3</sub>                  | control                       | 0.176154 | control + F malate                          | cis-aconitate |
| 363 | Fe(ClO <sub>4</sub> ) <sub>2</sub> | control                       | 0.240489 | control + F malate                          | cis-aconitate |
| 364 | Fe(ClO <sub>4</sub> ) <sub>3</sub> | control                       | 0.709213 | control + F malate                          | cis-aconitate |
| 365 | Fe Sulfide                         | control                       | 0.209853 | control + F malate                          | cis-aconitate |
| 366 | Fe Acetate                         | control                       | 0.30176  | control + F malate                          | cis-aconitate |
| 367 | Ferrocene                          | control                       | 0.148582 | control + F malate                          | cis-aconitate |
| 368 | control                            | control                       | 0.458001 | control + c malate                          | cis-aconitate |
| 369 | FeCl <sub>2</sub>                  | SO <sub>4</sub>               | -0.22517 | SO <sub>4</sub> + FeCl malate               | cis-aconitate |
| 370 | FeCl <sub>3</sub>                  | SO <sub>4</sub>               | 0.467192 | SO <sub>4</sub> + FeCl malate               | cis-aconitate |
| 371 | Fe(ClO <sub>4</sub> ) <sub>2</sub> | SO <sub>4</sub>               | -0.04749 | SO <sub>4</sub> + Fe(C malate               | cis-aconitate |
| 372 | Fe(ClO <sub>4</sub> ) <sub>3</sub> | SO <sub>4</sub>               | -0.99106 | SO <sub>4</sub> + Fe(C malate               | cis-aconitate |
| 373 | Fe Sulfide                         | SO <sub>4</sub>               | -0.43962 | SO <sub>4</sub> + Fe S malate               | cis-aconitate |
| 374 | Fe Acetate                         | SO <sub>4</sub>               | 0.176154 | SO <sub>4</sub> + Fe A malate               | cis-aconitate |
| 375 | Ferrocene                          | SO <sub>4</sub>               | -1.01557 | SO <sub>4</sub> + Ferr malate               | cis-aconitate |



|                |           |          |             |        |               |
|----------------|-----------|----------|-------------|--------|---------------|
| 376 control    | SO4       | 0.598925 | SO4 + cont  | malate | cis-aconitate |
| 377 FeCl2      | SO3       | -0.25887 | SO3 + FeCl  | malate | cis-aconitate |
| 378 FeCl3      | SO3       | 0.601988 | SO3 + FeCl  | malate | cis-aconitate |
| 379 Fe(ClO4)2  | SO3       | 0.721467 | SO3 + Fe(C  | malate | cis-aconitate |
| 380 Fe(ClO4)3  | SO3       | -0.85933 | SO3 + Fe(C  | malate | cis-aconitate |
| 381 Fe Sulfide | SO3       | -1.27903 | SO3 + Fe S  | malate | cis-aconitate |
| 382 Fe Acetate | SO3       | -1.32805 | SO3 + Fe A  | malate | cis-aconitate |
| 383 Ferrocene  | SO3       | -0.28644 | SO3 + Ferr  | malate | cis-aconitate |
| 384 control    | SO3       | -0.70615 | SO3 + cont  | malate | cis-aconitate |
| 385 FeCl2      | HSO3      | -0.26806 | HSO3 + Fe(C | malate | cis-aconitate |
| 386 FeCl3      | HSO3      | 0.822564 | HSO3 + Fe(C | malate | cis-aconitate |
| 387 Fe(ClO4)2  | HSO3      | -0.24968 | HSO3 + Fe(  | malate | cis-aconitate |
| 388 Fe(ClO4)3  | HSO3      | 0.078121 | HSO3 + Fe(  | malate | cis-aconitate |
| 389 Fe Sulfide | HSO3      | 0.99106  | HSO3 + Fe   | malate | cis-aconitate |
| 390 Fe Acetate | HSO3      | 0.828691 | HSO3 + Fe   | malate | cis-aconitate |
| 391 Ferrocene  | HSO3      | -0.07199 | HSO3 + Fer  | malate | cis-aconitate |
| 392 control    | HSO3      | 0.687768 | HSO3 + cor  | malate | cis-aconitate |
| 393 FeCl2      | DMSO      | 0.194536 | DMSO + Fe   | malate | cis-aconitate |
| 394 FeCl3      | DMSO      | 0.38754  | DMSO + Fe   | malate | cis-aconitate |
| 395 Fe(ClO4)2  | DMSO      | 0.010722 | DMSO + Fe   | malate | cis-aconitate |
| 396 Fe(ClO4)3  | DMSO      | 0.200663 | DMSO + Fe   | malate | cis-aconitate |
| 397 Fe Sulfide | DMSO      | -0.97574 | DMSO + Fe   | malate | cis-aconitate |
| 398 Fe Acetate | DMSO      | -0.39979 | DMSO + Fe   | malate | cis-aconitate |
| 399 Ferrocene  | DMSO      | -0.13939 | DMSO + Fe   | malate | cis-aconitate |
| 400 control    | DMSO      | 0.626497 | DMSO + co   | malate | cis-aconitate |
| 401 FeCl2      | Cys       | -0.52846 | Cys + FeCl2 | malate | cis-aconitate |
| 402 FeCl3      | Cys       | -0.01072 | Cys + FeCl3 | malate | cis-aconitate |
| 403 Fe(ClO4)2  | Cys       | -0.67551 | Cys + Fe(Cl | malate | cis-aconitate |
| 404 Fe(ClO4)3  | Cys       | -1.36175 | Cys + Fe(Cl | malate | cis-aconitate |
| 405 Fe Sulfide | Cys       | -0.13939 | Cys + Fe S  | malate | cis-aconitate |
| 406 Fe Acetate | Cys       | -0.23743 | Cys + Fe Ac | malate | cis-aconitate |
| 407 Ferrocene  | Cys       | 0.675514 | Cys + Ferro | malate | cis-aconitate |
| 408 control    | Cys       | -0.21598 | Cys + contr | malate | cis-aconitate |
| 409 FeCl2      | Methionin | -0.05361 | Methionin   | malate | cis-aconitate |
| 410 FeCl3      | Methionin | 0.062803 | Methionin   | malate | cis-aconitate |
| 411 Fe(ClO4)2  | Methionin | -0.29563 | Methionin   | malate | cis-aconitate |
| 412 Fe(ClO4)3  | Methionin | 1.386258 | Methionin   | malate | cis-aconitate |
| 413 Fe Sulfide | Methionin | -0.90528 | Methionin   | malate | cis-aconitate |
| 414 Fe Acetate | Methionin | 0.289506 | Methionin   | malate | cis-aconitate |
| 415 Ferrocene  | Methionin | -0.72759 | Methionin   | malate | cis-aconitate |
| 416 control    | Methionin | -0.48251 | Methionin   | malate | cis-aconitate |
| 417 FeCl2      | Homocyste | -0.27419 | Homocyste   | malate | cis-aconitate |
| 418 FeCl3      | Homocyste | 0.776611 | Homocyste   | malate | cis-aconitate |
| 419 Fe(ClO4)2  | Homocyste | -0.64181 | Homocyste   | malate | cis-aconitate |
| 420 Fe(ClO4)3  | Homocyste | -0.71228 | Homocyste   | malate | cis-aconitate |
| 421 Fe Sulfide | Homocyste | -0.88996 | Homocyste   | malate | cis-aconitate |
| 422 Fe Acetate | Homocyste | -0.0628  | Homocyste   | malate | cis-aconitate |

|     |                                    |                               |          |                                                 |               |
|-----|------------------------------------|-------------------------------|----------|-------------------------------------------------|---------------|
| 423 | Ferrocene                          | Homocyste                     | 0.399794 | Homocyste malate                                | cis-aconitate |
| 424 | control                            | Homocyste                     | -0.24355 | Homocyste malate                                | cis-aconitate |
| 425 | FeCl <sub>2</sub>                  | DL-Ethionir                   | -0.47638 | DL-Ethionir malate                              | cis-aconitate |
| 426 | FeCl <sub>3</sub>                  | DL-Ethionir                   | 0.105693 | DL-Ethionir malate                              | cis-aconitate |
| 427 | Fe(ClO <sub>4</sub> ) <sub>2</sub> | DL-Ethionir                   | 0.451874 | DL-Ethionir malate                              | cis-aconitate |
| 428 | Fe(ClO <sub>4</sub> ) <sub>3</sub> | DL-Ethionir                   | 0.62956  | DL-Ethionir malate                              | cis-aconitate |
| 429 | Fe Sulfide                         | DL-Ethionir                   | -0.03829 | DL-Ethionir malate                              | cis-aconitate |
| 430 | Fe Acetate                         | DL-Ethionir                   | -0.7184  | DL-Ethionir malate                              | cis-aconitate |
| 431 | Ferrocene                          | DL-Ethionir                   | 1.419957 | DL-Ethionir malate                              | cis-aconitate |
| 432 | control                            | DL-Ethionir                   | 2.945607 | DL-Ethionir malate                              | cis-aconitate |
| 433 | FeCl <sub>2</sub>                  | 2-Mercapt                     | 0.540717 | 2-Mercapt malate                                | cis-aconitate |
| 434 | FeCl <sub>3</sub>                  | 2-Mercapt                     | 0.084248 | 2-Mercapt malate                                | cis-aconitate |
| 435 | Fe(ClO <sub>4</sub> ) <sub>2</sub> | 2-Mercapt                     | -0.74291 | 2-Mercapt malate                                | cis-aconitate |
| 436 | Fe(ClO <sub>4</sub> ) <sub>3</sub> | 2-Mercapt                     | -0.96961 | 2-Mercapt malate                                | cis-aconitate |
| 437 | Fe Sulfide                         | 2-Mercapt                     | -0.83788 | 2-Mercapt malate                                | cis-aconitate |
| 438 | Fe Acetate                         | 2-Mercapt                     | -0.75823 | 2-Mercapt malate                                | cis-aconitate |
| 439 | Ferrocene                          | 2-Mercapt                     | -0.38754 | 2-Mercapt malate                                | cis-aconitate |
| 440 | control                            | 2-Mercapt                     | 1.141174 | 2-Mercapt malate                                | cis-aconitate |
| 441 | FeCl <sub>2</sub>                  | S <sub>2</sub> O <sub>8</sub> | -2.21613 | S <sub>2</sub> O <sub>8</sub> + FeC oxaloaceta  | cis-aconitate |
| 442 | FeCl <sub>3</sub>                  | S <sub>2</sub> O <sub>8</sub> | -0.16512 | S <sub>2</sub> O <sub>8</sub> + FeC oxaloaceta  | cis-aconitate |
| 443 | Fe(ClO <sub>4</sub> ) <sub>2</sub> | S <sub>2</sub> O <sub>8</sub> | 2.448054 | S <sub>2</sub> O <sub>8</sub> + Fe(C oxaloaceta | cis-aconitate |
| 444 | Fe(ClO <sub>4</sub> ) <sub>3</sub> | S <sub>2</sub> O <sub>8</sub> | 0.19085  | S <sub>2</sub> O <sub>8</sub> + Fe(C oxaloaceta | cis-aconitate |
| 445 | Fe Sulfide                         | S <sub>2</sub> O <sub>8</sub> | 0.459721 | S <sub>2</sub> O <sub>8</sub> + Fe(S oxaloaceta | cis-aconitate |
| 446 | Fe Acetate                         | S <sub>2</sub> O <sub>8</sub> | 0.131467 | S <sub>2</sub> O <sub>8</sub> + Fe(A oxaloaceta | cis-aconitate |
| 447 | Ferrocene                          | S <sub>2</sub> O <sub>8</sub> | -0.1153  | S <sub>2</sub> O <sub>8</sub> + Fer oxaloaceta  | cis-aconitate |
| 448 | control                            | S <sub>2</sub> O <sub>8</sub> | 0.231428 | S <sub>2</sub> O <sub>8</sub> + con oxaloaceta  | cis-aconitate |
| 449 | FeCl <sub>2</sub>                  | control                       | 2.001693 | control + F oxaloaceta                          | cis-aconitate |
| 450 | FeCl <sub>3</sub>                  | control                       | -2.35931 | control + F oxaloaceta                          | cis-aconitate |
| 451 | Fe(ClO <sub>4</sub> ) <sub>2</sub> | control                       | -1.90305 | control + F oxaloaceta                          | cis-aconitate |
| 452 | Fe(ClO <sub>4</sub> ) <sub>3</sub> | control                       | 0.317533 | control + F oxaloaceta                          | cis-aconitate |
| 453 | Fe Sulfide                         | control                       | -0.09023 | control + F oxaloaceta                          | cis-aconitate |
| 454 | Fe Acetate                         | control                       | -2.71198 | control + F oxaloaceta                          | cis-aconitate |
| 455 | Ferrocene                          | control                       | 1.819256 | control + F oxaloaceta                          | cis-aconitate |
| 456 | control                            | control                       | -0.19943 | control + C oxaloaceta                          | cis-aconitate |
| 457 | FeCl <sub>2</sub>                  | SO <sub>4</sub>               | 2.132665 | SO <sub>4</sub> + FeCl(C oxaloaceta             | cis-aconitate |
| 458 | FeCl <sub>3</sub>                  | SO <sub>4</sub>               | -0.02095 | SO <sub>4</sub> + FeCl(S oxaloaceta             | cis-aconitate |
| 459 | Fe(ClO <sub>4</sub> ) <sub>2</sub> | SO <sub>4</sub>               | 2.477085 | SO <sub>4</sub> + Fe(C oxaloaceta               | cis-aconitate |
| 460 | Fe(ClO <sub>4</sub> ) <sub>3</sub> | SO <sub>4</sub>               | 2.156418 | SO <sub>4</sub> + Fe(C oxaloaceta               | cis-aconitate |
| 461 | Fe Sulfide                         | SO <sub>4</sub>               | -2.27518 | SO <sub>4</sub> + Fe(S oxaloaceta               | cis-aconitate |
| 462 | Fe Acetate                         | SO <sub>4</sub>               | 0.141694 | SO <sub>4</sub> + Fe(A oxaloaceta               | cis-aconitate |
| 463 | Ferrocene                          | SO <sub>4</sub>               | 1.746018 | SO <sub>4</sub> + Ferr oxaloaceta               | cis-aconitate |
| 464 | control                            | SO <sub>4</sub>               | -1.74008 | SO <sub>4</sub> + cont oxaloaceta               | cis-aconitate |
| 465 | FeCl <sub>2</sub>                  | SO <sub>3</sub>               | 1.936372 | SO <sub>3</sub> + FeCl(C oxaloaceta             | cis-aconitate |
| 466 | FeCl <sub>3</sub>                  | SO <sub>3</sub>               | -2.03897 | SO <sub>3</sub> + FeCl(S oxaloaceta             | cis-aconitate |
| 467 | Fe(ClO <sub>4</sub> ) <sub>2</sub> | SO <sub>3</sub>               | 0.024248 | SO <sub>3</sub> + Fe(C oxaloaceta               | cis-aconitate |
| 468 | Fe(ClO <sub>4</sub> ) <sub>3</sub> | SO <sub>3</sub>               | 0.175674 | SO <sub>3</sub> + Fe(C oxaloaceta               | cis-aconitate |
| 469 | Fe Sulfide                         | SO <sub>3</sub>               | 0.05328  | SO <sub>3</sub> + Fe(S oxaloaceta               | cis-aconitate |

|                |             |          |                                      |
|----------------|-------------|----------|--------------------------------------|
| 470 Fe Acetate | SO3         | -2.10198 | SO3 + Fe A oxaloaceta cis-aconitate  |
| 471 Ferrocene  | SO3         | -0.04668 | SO3 + Ferr oxaloaceta cis-aconitate  |
| 472 control    | SO3         | -0.00247 | SO3 + cont oxaloaceta cis-aconitate  |
| 473 FeCl2      | HSO3        | 1.991466 | HSO3 + Fe( oxaloaceta cis-aconitate  |
| 474 FeCl3      | HSO3        | 0.074723 | HSO3 + Fe( oxaloaceta cis-aconitate  |
| 475 Fe(ClO4)2  | HSO3        | -0.17468 | HSO3 + Fe( oxaloaceta cis-aconitate  |
| 476 Fe(ClO4)3  | HSO3        | 2.517004 | HSO3 + Fe( oxaloaceta cis-aconitate  |
| 477 Fe Sulfide | HSO3        | 0.159179 | HSO3 + Fe . oxaloaceta cis-aconitate |
| 478 Fe Acetate | HSO3        | -1.97596 | HSO3 + Fe . oxaloaceta cis-aconitate |
| 479 Ferrocene  | HSO3        | -2.02215 | HSO3 + Fer oxaloaceta cis-aconitate  |
| 480 control    | HSO3        | -0.24792 | HSO3 + cor oxaloaceta cis-aconitate  |
| 481 FeCl2      | DMSO        | 0.05031  | DMSO + Fe oxaloaceta cis-aconitate   |
| 482 FeCl3      | DMSO        | -2.16829 | DMSO + Fe oxaloaceta cis-aconitate   |
| 483 Fe(ClO4)2  | DMSO        | -0.09683 | DMSO + Fe oxaloaceta cis-aconitate   |
| 484 Fe(ClO4)3  | DMSO        | -0.56199 | DMSO + Fe oxaloaceta cis-aconitate   |
| 485 Fe Sulfide | DMSO        | 0.009072 | DMSO + Fe oxaloaceta cis-aconitate   |
| 486 Fe Acetate | DMSO        | 2.058767 | DMSO + Fe oxaloaceta cis-aconitate   |
| 487 Ferrocene  | DMSO        | -0.24231 | DMSO + Fe oxaloaceta cis-aconitate   |
| 488 control    | DMSO        | 0.066476 | DMSO + co oxaloaceta cis-aconitate   |
| 489 FeCl2      | Cys         | -1.79847 | Cys + FeCl2 oxaloaceta cis-aconitate |
| 490 FeCl3      | Cys         | 1.034414 | Cys + FeCl3 oxaloaceta cis-aconitate |
| 491 Fe(ClO4)2  | Cys         | 2.591562 | Cys + Fe(Cl oxaloaceta cis-aconitate |
| 492 Fe(ClO4)3  | Cys         | 0.217902 | Cys + Fe(Cl oxaloaceta cis-aconitate |
| 493 Fe Sulfide | Cys         | -0.11299 | Cys + Fe Su oxaloaceta cis-aconitate |
| 494 Fe Acetate | Cys         | -0.10804 | Cys + Fe Ac oxaloaceta cis-aconitate |
| 495 Ferrocene  | Cys         | 2.028745 | Cys + Ferro oxaloaceta cis-aconitate |
| 496 control    | Cys         | 2.299597 | Cys + contr oxaloaceta cis-aconitate |
| 497 FeCl2      | Methionin   | 2.429249 | Methionin oxaloaceta cis-aconitate   |
| 498 FeCl3      | Methionin   | 0.239345 | Methionin oxaloaceta cis-aconitate   |
| 499 Fe(ClO4)2  | Methionin   | 2.299597 | Methionin oxaloaceta cis-aconitate   |
| 500 Fe(ClO4)3  | Methionin   | 0.700551 | Methionin oxaloaceta cis-aconitate   |
| 501 Fe Sulfide | Methionin   | 0.019629 | Methionin oxaloaceta cis-aconitate   |
| 502 Fe Acetate | Methionin   | 0.002474 | Methionin oxaloaceta cis-aconitate   |
| 503 Ferrocene  | Methionin   | -0.16149 | Methionin oxaloaceta cis-aconitate   |
| 504 control    | Methionin   | -0.31027 | Methionin oxaloaceta cis-aconitate   |
| 505 FeCl2      | Homocyste   | 0.171385 | Homocyste oxaloaceta cis-aconitate   |
| 506 FeCl3      | Homocyste   | 2.087468 | Homocyste oxaloaceta cis-aconitate   |
| 507 Fe(ClO4)2  | Homocyste   | 0.032496 | Homocyste oxaloaceta cis-aconitate   |
| 508 Fe(ClO4)3  | Homocyste   | -0.04899 | Homocyste oxaloaceta cis-aconitate   |
| 509 Fe Sulfide | Homocyste   | -0.02293 | Homocyste oxaloaceta cis-aconitate   |
| 510 Fe Acetate | Homocyste   | -1.76548 | Homocyste oxaloaceta cis-aconitate   |
| 511 Ferrocene  | Homocyste   | -2.13992 | Homocyste oxaloaceta cis-aconitate   |
| 512 control    | Homocyste   | -0.45015 | Homocyste oxaloaceta cis-aconitate   |
| 513 FeCl2      | DL-Ethionir | -0.11266 | DL-Ethionir oxaloaceta cis-aconitate |
| 514 FeCl3      | DL-Ethionir | -2.18215 | DL-Ethionir oxaloaceta cis-aconitate |
| 515 Fe(ClO4)2  | DL-Ethionir | 2.168955 | DL-Ethionir oxaloaceta cis-aconitate |
| 516 Fe(ClO4)3  | DL-Ethionir | -2.0106  | DL-Ethionir oxaloaceta cis-aconitate |

|     |                                    |                               |          |                                               |               |
|-----|------------------------------------|-------------------------------|----------|-----------------------------------------------|---------------|
| 517 | Fe Sulfide                         | DL-Ethionir                   | 2.039302 | DL-Ethionir oxaloaceta                        | cis-aconitate |
| 518 | Fe Acetate                         | DL-Ethionir                   | -0.43168 | DL-Ethionir oxaloaceta                        | cis-aconitate |
| 519 | Ferrocene                          | DL-Ethionir                   | -0.2819  | DL-Ethionir oxaloaceta                        | cis-aconitate |
| 520 | control                            | DL-Ethionir                   | -0.56232 | DL-Ethionir oxaloaceta                        | cis-aconitate |
| 521 | FeCl <sub>2</sub>                  | 2-Mercapt                     | -0.11992 | 2-Mercapt(oxaloaceta                          | cis-aconitate |
| 522 | FeCl <sub>3</sub>                  | 2-Mercapt                     | 2.186769 | 2-Mercapt(oxaloaceta                          | cis-aconitate |
| 523 | Fe(ClO <sub>4</sub> ) <sub>2</sub> | 2-Mercapt                     | -0.11827 | 2-Mercapt(oxaloaceta                          | cis-aconitate |
| 524 | Fe(ClO <sub>4</sub> ) <sub>3</sub> | 2-Mercapt                     | 2.275514 | 2-Mercapt(oxaloaceta                          | cis-aconitate |
| 525 | Fe Sulfide                         | 2-Mercapt                     | 2.275514 | 2-Mercapt(oxaloaceta                          | cis-aconitate |
| 526 | Fe Acetate                         | 2-Mercapt                     | -1.86907 | 2-Mercapt(oxaloaceta                          | cis-aconitate |
| 527 | Ferrocene                          | 2-Mercapt                     | 2.076252 | 2-Mercapt(oxaloaceta                          | cis-aconitate |
| 528 | control                            | 2-Mercapt                     | -0.11365 | 2-Mercapt(oxaloaceta                          | cis-aconitate |
| 529 | FeCl <sub>2</sub>                  | S <sub>2</sub> O <sub>8</sub> | 2.405118 | S <sub>2</sub> O <sub>8</sub> + FeC pyruvate  | cis-aconitate |
| 530 | FeCl <sub>3</sub>                  | S <sub>2</sub> O <sub>8</sub> | 5.270392 | S <sub>2</sub> O <sub>8</sub> + FeC pyruvate  | cis-aconitate |
| 531 | Fe(ClO <sub>4</sub> ) <sub>2</sub> | S <sub>2</sub> O <sub>8</sub> | 4.43773  | S <sub>2</sub> O <sub>8</sub> + Fe( pyruvate  | cis-aconitate |
| 532 | Fe(ClO <sub>4</sub> ) <sub>3</sub> | S <sub>2</sub> O <sub>8</sub> | 2.530331 | S <sub>2</sub> O <sub>8</sub> + Fe( pyruvate  | cis-aconitate |
| 533 | Fe Sulfide                         | S <sub>2</sub> O <sub>8</sub> | 17.81874 | S <sub>2</sub> O <sub>8</sub> + Fe ! pyruvate | cis-aconitate |
| 534 | Fe Acetate                         | S <sub>2</sub> O <sub>8</sub> | 4.554595 | S <sub>2</sub> O <sub>8</sub> + Fe , pyruvate | cis-aconitate |
| 535 | Ferrocene                          | S <sub>2</sub> O <sub>8</sub> | 19.32129 | S <sub>2</sub> O <sub>8</sub> + Fer pyruvate  | cis-aconitate |
| 536 | control                            | S <sub>2</sub> O <sub>8</sub> | 16.01778 | S <sub>2</sub> O <sub>8</sub> + con pyruvate  | cis-aconitate |
| 537 | FeCl <sub>2</sub>                  | control                       | -0.42677 | control + F pyruvate                          | cis-aconitate |
| 538 | FeCl <sub>3</sub>                  | control                       | 0.220165 | control + F pyruvate                          | cis-aconitate |
| 539 | Fe(ClO <sub>4</sub> ) <sub>2</sub> | control                       | -2.73067 | control + F pyruvate                          | cis-aconitate |
| 540 | Fe(ClO <sub>4</sub> ) <sub>3</sub> | control                       | 0.879616 | control + F pyruvate                          | cis-aconitate |
| 541 | Fe Sulfide                         | control                       | -0.44972 | control + F pyruvate                          | cis-aconitate |
| 542 | Fe Acetate                         | control                       | -0.49563 | control + F pyruvate                          | cis-aconitate |
| 543 | Ferrocene                          | control                       | -0.81284 | control + F pyruvate                          | cis-aconitate |
| 544 | control                            | control                       | -0.16799 | control + c pyruvate                          | cis-aconitate |
| 545 | FeCl <sub>2</sub>                  | SO <sub>4</sub>               | -0.28277 | SO <sub>4</sub> + FeCl: pyruvate              | cis-aconitate |
| 546 | FeCl <sub>3</sub>                  | SO <sub>4</sub>               | 0.311987 | SO <sub>4</sub> + FeCl: pyruvate              | cis-aconitate |
| 547 | Fe(ClO <sub>4</sub> ) <sub>2</sub> | SO <sub>4</sub>               | -0.41007 | SO <sub>4</sub> + Fe(C pyruvate               | cis-aconitate |
| 548 | Fe(ClO <sub>4</sub> ) <sub>3</sub> | SO <sub>4</sub>               | 0.263989 | SO <sub>4</sub> + Fe(C pyruvate               | cis-aconitate |
| 549 | Fe Sulfide                         | SO <sub>4</sub>               | -0.32242 | SO <sub>4</sub> + Fe S pyruvate               | cis-aconitate |
| 550 | Fe Acetate                         | SO <sub>4</sub>               | -0.01774 | SO <sub>4</sub> + Fe A pyruvate               | cis-aconitate |
| 551 | Ferrocene                          | SO <sub>4</sub>               | -0.61667 | SO <sub>4</sub> + Ferr pyruvate               | cis-aconitate |
| 552 | control                            | SO <sub>4</sub>               | -0.52276 | SO <sub>4</sub> + cont pyruvate               | cis-aconitate |
| 553 | FeCl <sub>2</sub>                  | SO <sub>3</sub>               | -0.19512 | SO <sub>3</sub> + FeCl: pyruvate              | cis-aconitate |
| 554 | FeCl <sub>3</sub>                  | SO <sub>3</sub>               | 0.324508 | SO <sub>3</sub> + FeCl: pyruvate              | cis-aconitate |
| 555 | Fe(ClO <sub>4</sub> ) <sub>2</sub> | SO <sub>3</sub>               | -0.6751  | SO <sub>3</sub> + Fe(C pyruvate               | cis-aconitate |
| 556 | Fe(ClO <sub>4</sub> ) <sub>3</sub> | SO <sub>3</sub>               | 0.65006  | SO <sub>3</sub> + Fe(C pyruvate               | cis-aconitate |
| 557 | Fe Sulfide                         | SO <sub>3</sub>               | -0.0553  | SO <sub>3</sub> + Fe S pyruvate               | cis-aconitate |
| 558 | Fe Acetate                         | SO <sub>3</sub>               | 0.366246 | SO <sub>3</sub> + Fe A pyruvate               | cis-aconitate |
| 559 | Ferrocene                          | SO <sub>3</sub>               | 0.238947 | SO <sub>3</sub> + Ferr pyruvate               | cis-aconitate |
| 560 | control                            | SO <sub>3</sub>               | -0.89005 | SO <sub>3</sub> + cont pyruvate               | cis-aconitate |
| 561 | FeCl <sub>2</sub>                  | HSO <sub>3</sub>              | -0.42468 | HSO <sub>3</sub> + FeC pyruvate               | cis-aconitate |
| 562 | FeCl <sub>3</sub>                  | HSO <sub>3</sub>              | -0.27234 | HSO <sub>3</sub> + FeC pyruvate               | cis-aconitate |
| 563 | Fe(ClO <sub>4</sub> ) <sub>2</sub> | HSO <sub>3</sub>              | 0.380854 | HSO <sub>3</sub> + Fe( pyruvate               | cis-aconitate |

|     |            |             |          |                      |               |
|-----|------------|-------------|----------|----------------------|---------------|
| 564 | Fe(ClO4)3  | HSO3        | 0.263989 | HSO3 + Fe( pyruvate  | cis-aconitate |
| 565 | Fe Sulfide | HSO3        | 1.353336 | HSO3 + Fe pyruvate   | cis-aconitate |
| 566 | Fe Acetate | HSO3        | 5.130571 | HSO3 + Fe pyruvate   | cis-aconitate |
| 567 | Ferrocene  | HSO3        | 2.336252 | HSO3 + Fer pyruvate  | cis-aconitate |
| 568 | control    | HSO3        | 0.197209 | HSO3 + cor pyruvate  | cis-aconitate |
| 569 | FeCl2      | DMSO        | -0.07826 | DMSO + Fe pyruvate   | cis-aconitate |
| 570 | FeCl3      | DMSO        | -0.60624 | DMSO + Fe pyruvate   | cis-aconitate |
| 571 | Fe(ClO4)2  | DMSO        | 0.117908 | DMSO + Fe pyruvate   | cis-aconitate |
| 572 | Fe(ClO4)3  | DMSO        | -0.13878 | DMSO + Fe pyruvate   | cis-aconitate |
| 573 | Fe Sulfide | DMSO        | -0.38711 | DMSO + Fe pyruvate   | cis-aconitate |
| 574 | Fe Acetate | DMSO        | -0.66467 | DMSO + Fe pyruvate   | cis-aconitate |
| 575 | Ferrocene  | DMSO        | -0.18469 | DMSO + Fe pyruvate   | cis-aconitate |
| 576 | control    | DMSO        | -0.41007 | DMSO + co pyruvate   | cis-aconitate |
| 577 | FeCl2      | Cys         | 0.622931 | Cys + FeCl2 pyruvate | cis-aconitate |
| 578 | FeCl3      | Cys         | -0.48728 | Cys + FeCl3 pyruvate | cis-aconitate |
| 579 | Fe(ClO4)2  | Cys         | 1.171778 | Cys + Fe(Cl pyruvate | cis-aconitate |
| 580 | Fe(ClO4)3  | Cys         | 0.299466 | Cys + Fe(Cl pyruvate | cis-aconitate |
| 581 | Fe Sulfide | Cys         | 0.433026 | Cys + Fe Su pyruvate | cis-aconitate |
| 582 | Fe Acetate | Cys         | 1.025697 | Cys + Fe Ac pyruvate | cis-aconitate |
| 583 | Ferrocene  | Cys         | -0.29321 | Cys + Ferro pyruvate | cis-aconitate |
| 584 | control    | Cys         | -0.14921 | Cys + contr pyruvate | cis-aconitate |
| 585 | FeCl2      | Methionine  | -0.52902 | Methionine pyruvate  | cis-aconitate |
| 586 | FeCl3      | Methionine  | 0.049041 | Methionine pyruvate  | cis-aconitate |
| 587 | Fe(ClO4)2  | Methionine  | -0.11373 | Methionine pyruvate  | cis-aconitate |
| 588 | Fe(ClO4)3  | Methionine  | 0.263989 | Methionine pyruvate  | cis-aconitate |
| 589 | Fe Sulfide | Methionine  | -0.06782 | Methionine pyruvate  | cis-aconitate |
| 590 | Fe Acetate | Methionine  | -0.53111 | Methionine pyruvate  | cis-aconitate |
| 591 | Ferrocene  | Methionine  | -0.71893 | Methionine pyruvate  | cis-aconitate |
| 592 | control    | Methionine  | -0.52693 | Methionine pyruvate  | cis-aconitate |
| 593 | FeCl2      | Homocyste   | -0.51859 | Homocyste pyruvate   | cis-aconitate |
| 594 | FeCl3      | Homocyste   | 1.180125 | Homocyste pyruvate   | cis-aconitate |
| 595 | Fe(ClO4)2  | Homocyste   | -0.59371 | Homocyste pyruvate   | cis-aconitate |
| 596 | Fe(ClO4)3  | Homocyste   | 0.704319 | Homocyste pyruvate   | cis-aconitate |
| 597 | Fe Sulfide | Homocyste   | 1.632976 | Homocyste pyruvate   | cis-aconitate |
| 598 | Fe Acetate | Homocyste   | -0.49563 | Homocyste pyruvate   | cis-aconitate |
| 599 | Ferrocene  | Homocyste   | -0.09704 | Homocyste pyruvate   | cis-aconitate |
| 600 | control    | Homocyste   | -0.43094 | Homocyste pyruvate   | cis-aconitate |
| 601 | FeCl2      | DL-Ethionir | -0.32033 | DL-Ethionir pyruvate | cis-aconitate |
| 602 | FeCl3      | DL-Ethionir | -0.04278 | DL-Ethionir pyruvate | cis-aconitate |
| 603 | Fe(ClO4)2  | DL-Ethionir | -0.30364 | DL-Ethionir pyruvate | cis-aconitate |
| 604 | Fe(ClO4)3  | DL-Ethionir | -0.04695 | DL-Ethionir pyruvate | cis-aconitate |
| 605 | Fe Sulfide | DL-Ethionir | 0.082431 | DL-Ethionir pyruvate | cis-aconitate |
| 606 | Fe Acetate | DL-Ethionir | -0.5478  | DL-Ethionir pyruvate | cis-aconitate |
| 607 | Ferrocene  | DL-Ethionir | 0.255642 | DL-Ethionir pyruvate | cis-aconitate |
| 608 | control    | DL-Ethionir | -0.50815 | DL-Ethionir pyruvate | cis-aconitate |
| 609 | FeCl2      | 2-Mercapt   | 0.998568 | 2-Mercapt pyruvate   | cis-aconitate |
| 610 | FeCl3      | 2-Mercapt   | 0.75023  | 2-Mercapt pyruvate   | cis-aconitate |

|     |            |           |          |                        |               |
|-----|------------|-----------|----------|------------------------|---------------|
| 611 | Fe(ClO4)2  | 2-Mercapt | 0.906745 | 2-Mercapt(pyruvate     | cis-aconitate |
| 612 | Fe(ClO4)3  | 2-Mercapt | 0.226425 | 2-Mercapt(pyruvate     | cis-aconitate |
| 613 | Fe Sulfide | 2-Mercapt | 0.355811 | 2-Mercapt(pyruvate     | cis-aconitate |
| 614 | Fe Acetate | 2-Mercapt | 0.282771 | 2-Mercapt(pyruvate     | cis-aconitate |
| 615 | Ferrocene  | 2-Mercapt | -2.85797 | 2-Mercapt(pyruvate     | cis-aconitate |
| 616 | control    | 2-Mercapt | 0.019825 | 2-Mercapt(pyruvate     | cis-aconitate |
| 617 | FeCl2      | S2O8      | 10.00242 | S2O8 + FeC succinate   | cis-aconitate |
| 618 | FeCl3      | S2O8      | 18.76479 | S2O8 + FeC succinate   | cis-aconitate |
| 619 | Fe(ClO4)2  | S2O8      | 11.38896 | S2O8 + Fe( succinate   | cis-aconitate |
| 620 | Fe(ClO4)3  | S2O8      | 27.90202 | S2O8 + Fe( succinate   | cis-aconitate |
| 621 | Fe Sulfide | S2O8      | 37.99382 | S2O8 + Fe ' succinate  | cis-aconitate |
| 622 | Fe Acetate | S2O8      | 21.23746 | S2O8 + Fe ' succinate  | cis-aconitate |
| 623 | Ferrocene  | S2O8      | 35.51742 | S2O8 + Fer succinate   | cis-aconitate |
| 624 | control    | S2O8      | 31.56759 | S2O8 + con succinate   | cis-aconitate |
| 625 | FeCl2      | control   | -0.44935 | control + F( succinate | cis-aconitate |
| 626 | FeCl3      | control   | -0.53128 | control + F( succinate | cis-aconitate |
| 627 | Fe(ClO4)2  | control   | 0.444387 | control + F( succinate | cis-aconitate |
| 628 | Fe(ClO4)3  | control   | 1.762651 | control + F( succinate | cis-aconitate |
| 629 | Fe Sulfide | control   | -0.9707  | control + F( succinate | cis-aconitate |
| 630 | Fe Acetate | control   | 0.692647 | control + F( succinate | cis-aconitate |
| 631 | Ferrocene  | control   | 0.921047 | control + F( succinate | cis-aconitate |
| 632 | control    | control   | -0.99553 | control + c( succinate | cis-aconitate |
| 633 | FeCl2      | SO4       | 0.412113 | SO4 + FeCl( succinate  | cis-aconitate |
| 634 | FeCl3      | SO4       | -0.08317 | SO4 + FeCl( succinate  | cis-aconitate |
| 635 | Fe(ClO4)2  | SO4       | -1.03276 | SO4 + Fe(C succinate   | cis-aconitate |
| 636 | Fe(ClO4)3  | SO4       | -0.41832 | SO4 + Fe(C succinate   | cis-aconitate |
| 637 | Fe Sulfide | SO4       | -0.01986 | SO4 + Fe S( succinate  | cis-aconitate |
| 638 | Fe Acetate | SO4       | 0.147715 | SO4 + Fe A( succinate  | cis-aconitate |
| 639 | Ferrocene  | SO4       | -0.18744 | SO4 + Ferr( succinate  | cis-aconitate |
| 640 | control    | SO4       | 0.062065 | SO4 + cont succinate   | cis-aconitate |
| 641 | FeCl2      | SO3       | -0.8354  | SO3 + FeCl( succinate  | cis-aconitate |
| 642 | FeCl3      | SO3       | 0.420802 | SO3 + FeCl( succinate  | cis-aconitate |
| 643 | Fe(ClO4)2  | SO3       | 0.003724 | SO3 + Fe(C succinate   | cis-aconitate |
| 644 | Fe(ClO4)3  | SO3       | -1.05759 | SO3 + Fe(C succinate   | cis-aconitate |
| 645 | Fe Sulfide | SO3       | 0.712508 | SO3 + Fe S( succinate  | cis-aconitate |
| 646 | Fe Acetate | SO3       | 0.765884 | SO3 + Fe A( succinate  | cis-aconitate |
| 647 | Ferrocene  | SO3       | 0.167576 | SO3 + Ferr( succinate  | cis-aconitate |
| 648 | control    | SO3       | 1.303369 | SO3 + cont succinate   | cis-aconitate |
| 649 | FeCl2      | HSO3      | -0.85153 | HSO3 + FeC succinate   | cis-aconitate |
| 650 | FeCl3      | HSO3      | -0.59334 | HSO3 + FeC succinate   | cis-aconitate |
| 651 | Fe(ClO4)2  | HSO3      | -1.0489  | HSO3 + Fe( succinate   | cis-aconitate |
| 652 | Fe(ClO4)3  | HSO3      | -0.19613 | HSO3 + Fe( succinate   | cis-aconitate |
| 653 | Fe Sulfide | HSO3      | 0.254467 | HSO3 + Fe ' succinate  | cis-aconitate |
| 654 | Fe Acetate | HSO3      | 0.459282 | HSO3 + Fe ' succinate  | cis-aconitate |
| 655 | Ferrocene  | HSO3      | 1.613695 | HSO3 + Fer succinate   | cis-aconitate |
| 656 | control    | HSO3      | 2.574464 | HSO3 + cor succinate   | cis-aconitate |
| 657 | FeCl2      | DMSO      | 1.027799 | DMSO + Fe succinate    | cis-aconitate |

|     |                                    |             |          |                                      |               |
|-----|------------------------------------|-------------|----------|--------------------------------------|---------------|
| 658 | FeCl <sub>3</sub>                  | DMSO        | -0.72989 | DMSO + Fe succinate                  | cis-aconitate |
| 659 | Fe(ClO <sub>4</sub> ) <sub>2</sub> | DMSO        | 0.063306 | DMSO + Fe succinate                  | cis-aconitate |
| 660 | Fe(ClO <sub>4</sub> ) <sub>3</sub> | DMSO        | 0.058341 | DMSO + Fe succinate                  | cis-aconitate |
| 661 | Fe Sulfide                         | DMSO        | -0.72616 | DMSO + Fe succinate                  | cis-aconitate |
| 662 | Fe Acetate                         | DMSO        | -0.33143 | DMSO + Fe succinate                  | cis-aconitate |
| 663 | Ferrocene                          | DMSO        | -0.25571 | DMSO + Fe succinate                  | cis-aconitate |
| 664 | control                            | DMSO        | 0.726163 | DMSO + co succinate                  | cis-aconitate |
| 665 | FeCl <sub>2</sub>                  | Cys         | -0.79568 | Cys + FeCl <sub>2</sub> succinate    | cis-aconitate |
| 666 | FeCl <sub>3</sub>                  | Cys         | -0.06703 | Cys + FeCl <sub>3</sub> succinate    | cis-aconitate |
| 667 | Fe(ClO <sub>4</sub> ) <sub>2</sub> | Cys         | -0.072   | Cys + Fe(Cl <sub>4</sub> ) succinate | cis-aconitate |
| 668 | Fe(ClO <sub>4</sub> ) <sub>3</sub> | Cys         | 0.611963 | Cys + Fe(Cl <sub>4</sub> ) succinate | cis-aconitate |
| 669 | Fe Sulfide                         | Cys         | -0.18247 | Cys + Fe Su succinate                | cis-aconitate |
| 670 | Fe Acetate                         | Cys         | -0.86395 | Cys + Fe Ac succinate                | cis-aconitate |
| 671 | Ferrocene                          | Cys         | 0.38108  | Cys + Ferro succinate                | cis-aconitate |
| 672 | control                            | Cys         | -0.21102 | Cys + contr succinate                | cis-aconitate |
| 673 | FeCl <sub>2</sub>                  | Methionine  | 0.357495 | Methionine succinate                 | cis-aconitate |
| 674 | FeCl <sub>3</sub>                  | Methionine  | 0.450593 | Methionine succinate                 | cis-aconitate |
| 675 | Fe(ClO <sub>4</sub> ) <sub>2</sub> | Methionine  | -0.19613 | Methionine succinate                 | cis-aconitate |
| 676 | Fe(ClO <sub>4</sub> ) <sub>3</sub> | Methionine  | -0.57969 | Methionine succinate                 | cis-aconitate |
| 677 | Fe Sulfide                         | Methionine  | -0.43942 | Methionine succinate                 | cis-aconitate |
| 678 | Fe Acetate                         | Methionine  | 0.86643  | Methionine succinate                 | cis-aconitate |
| 679 | Ferrocene                          | Methionine  | -0.42453 | Methionine succinate                 | cis-aconitate |
| 680 | control                            | Methionine  | -0.571   | Methionine succinate                 | cis-aconitate |
| 681 | FeCl <sub>2</sub>                  | Homocyste   | -0.42204 | Homocyste succinate                  | cis-aconitate |
| 682 | FeCl <sub>3</sub>                  | Homocyste   | 0.19985  | Homocyste succinate                  | cis-aconitate |
| 683 | Fe(ClO <sub>4</sub> ) <sub>2</sub> | Homocyste   | 0.496521 | Homocyste succinate                  | cis-aconitate |
| 684 | Fe(ClO <sub>4</sub> ) <sub>3</sub> | Homocyste   | -0.03103 | Homocyste succinate                  | cis-aconitate |
| 685 | Fe Sulfide                         | Homocyste   | -0.29667 | Homocyste succinate                  | cis-aconitate |
| 686 | Fe Acetate                         | Homocyste   | -0.00745 | Homocyste succinate                  | cis-aconitate |
| 687 | Ferrocene                          | Homocyste   | -0.43321 | Homocyste succinate                  | cis-aconitate |
| 688 | control                            | Homocyste   | 0.021102 | Homocyste succinate                  | cis-aconitate |
| 689 | FeCl <sub>2</sub>                  | DL-Ethionir | -1.30958 | DL-Ethionir succinate                | cis-aconitate |
| 690 | FeCl <sub>3</sub>                  | DL-Ethionir | 0.279293 | DL-Ethionir succinate                | cis-aconitate |
| 691 | Fe(ClO <sub>4</sub> ) <sub>2</sub> | DL-Ethionir | 0.062065 | DL-Ethionir succinate                | cis-aconitate |
| 692 | Fe(ClO <sub>4</sub> ) <sub>3</sub> | DL-Ethionir | 0.703819 | DL-Ethionir succinate                | cis-aconitate |
| 693 | Fe Sulfide                         | DL-Ethionir | -0.01241 | DL-Ethionir succinate                | cis-aconitate |
| 694 | Fe Acetate                         | DL-Ethionir | -0.3004  | DL-Ethionir succinate                | cis-aconitate |
| 695 | Ferrocene                          | DL-Ethionir | 0.048411 | DL-Ethionir succinate                | cis-aconitate |
| 696 | control                            | DL-Ethionir | -0.5561  | DL-Ethionir succinate                | cis-aconitate |
| 697 | FeCl <sub>2</sub>                  | 2-Mercapt   | -0.47666 | 2-Mercapt succinate                  | cis-aconitate |
| 698 | FeCl <sub>3</sub>                  | 2-Mercapt   | -0.86271 | 2-Mercapt succinate                  | cis-aconitate |
| 699 | Fe(ClO <sub>4</sub> ) <sub>2</sub> | 2-Mercapt   | 0.464248 | 2-Mercapt succinate                  | cis-aconitate |
| 700 | Fe(ClO <sub>4</sub> ) <sub>3</sub> | 2-Mercapt   | -1.37164 | 2-Mercapt succinate                  | cis-aconitate |
| 701 | Fe Sulfide                         | 2-Mercapt   | 0.15268  | 2-Mercapt succinate                  | cis-aconitate |
| 702 | Fe Acetate                         | 2-Mercapt   | -0.08565 | 2-Mercapt succinate                  | cis-aconitate |
| 703 | Ferrocene                          | 2-Mercapt   | -0.29295 | 2-Mercapt succinate                  | cis-aconitate |
| 704 | control                            | 2-Mercapt   | 0.749747 | 2-Mercapt succinate                  | cis-aconitate |

|     |                                    |                  |    |                                                              |
|-----|------------------------------------|------------------|----|--------------------------------------------------------------|
| 705 | FeCl <sub>2</sub>                  | S2O8             | NA | S2O8 + FeC succsemial cis-aconitate                          |
| 706 | FeCl <sub>3</sub>                  | S2O8             | NA | S2O8 + FeC succsemial cis-aconitate                          |
| 707 | Fe(ClO <sub>4</sub> ) <sub>2</sub> | S2O8             | NA | S2O8 + Fe( succsemial cis-aconitate                          |
| 708 | Fe(ClO <sub>4</sub> ) <sub>3</sub> | S2O8             | NA | S2O8 + Fe( succsemial cis-aconitate                          |
| 709 | Fe Sulfide                         | S2O8             | NA | S2O8 + Fe ! succsemial cis-aconitate                         |
| 710 | Fe Acetate                         | S2O8             | NA | S2O8 + Fe , succsemial cis-aconitate                         |
| 711 | Ferrocene                          | S2O8             | NA | S2O8 + Fer succsemial cis-aconitate                          |
| 712 | control                            | S2O8             | NA | S2O8 + con succsemial cis-aconitate                          |
| 713 | FeCl <sub>2</sub>                  | control          | NA | control + F <sub>i</sub> succsemial cis-aconitate            |
| 714 | FeCl <sub>3</sub>                  | control          | NA | control + F <sub>i</sub> succsemial cis-aconitate            |
| 715 | Fe(ClO <sub>4</sub> ) <sub>2</sub> | control          | NA | control + F <sub>i</sub> succsemial cis-aconitate            |
| 716 | Fe(ClO <sub>4</sub> ) <sub>3</sub> | control          | NA | control + F <sub>i</sub> succsemial cis-aconitate            |
| 717 | Fe Sulfide                         | control          | NA | control + F <sub>i</sub> succsemial cis-aconitate            |
| 718 | Fe Acetate                         | control          | NA | control + F <sub>i</sub> succsemial cis-aconitate            |
| 719 | Ferrocene                          | control          | NA | control + F <sub>i</sub> succsemial cis-aconitate            |
| 720 | control                            | control          | NA | control + c <sub>i</sub> succsemial cis-aconitate            |
| 721 | FeCl <sub>2</sub>                  | SO <sub>4</sub>  | NA | SO <sub>4</sub> + FeCl <sub>2</sub> succsemial cis-aconitate |
| 722 | FeCl <sub>3</sub>                  | SO <sub>4</sub>  | NA | SO <sub>4</sub> + FeCl <sub>3</sub> succsemial cis-aconitate |
| 723 | Fe(ClO <sub>4</sub> ) <sub>2</sub> | SO <sub>4</sub>  | NA | SO <sub>4</sub> + Fe(C succsemial cis-aconitate              |
| 724 | Fe(ClO <sub>4</sub> ) <sub>3</sub> | SO <sub>4</sub>  | NA | SO <sub>4</sub> + Fe(C succsemial cis-aconitate              |
| 725 | Fe Sulfide                         | SO <sub>4</sub>  | NA | SO <sub>4</sub> + Fe S <sub>i</sub> succsemial cis-aconitate |
| 726 | Fe Acetate                         | SO <sub>4</sub>  | NA | SO <sub>4</sub> + Fe A <sub>i</sub> succsemial cis-aconitate |
| 727 | Ferrocene                          | SO <sub>4</sub>  | NA | SO <sub>4</sub> + Ferr <sub>i</sub> succsemial cis-aconitate |
| 728 | control                            | SO <sub>4</sub>  | NA | SO <sub>4</sub> + cont succsemial cis-aconitate              |
| 729 | FeCl <sub>2</sub>                  | SO <sub>3</sub>  | NA | SO <sub>3</sub> + FeCl <sub>2</sub> succsemial cis-aconitate |
| 730 | FeCl <sub>3</sub>                  | SO <sub>3</sub>  | NA | SO <sub>3</sub> + FeCl <sub>3</sub> succsemial cis-aconitate |
| 731 | Fe(ClO <sub>4</sub> ) <sub>2</sub> | SO <sub>3</sub>  | NA | SO <sub>3</sub> + Fe(C succsemial cis-aconitate              |
| 732 | Fe(ClO <sub>4</sub> ) <sub>3</sub> | SO <sub>3</sub>  | NA | SO <sub>3</sub> + Fe(C succsemial cis-aconitate              |
| 733 | Fe Sulfide                         | SO <sub>3</sub>  | NA | SO <sub>3</sub> + Fe S <sub>i</sub> succsemial cis-aconitate |
| 734 | Fe Acetate                         | SO <sub>3</sub>  | NA | SO <sub>3</sub> + Fe A <sub>i</sub> succsemial cis-aconitate |
| 735 | Ferrocene                          | SO <sub>3</sub>  | NA | SO <sub>3</sub> + Ferr <sub>i</sub> succsemial cis-aconitate |
| 736 | control                            | SO <sub>3</sub>  | NA | SO <sub>3</sub> + cont succsemial cis-aconitate              |
| 737 | FeCl <sub>2</sub>                  | HSO <sub>3</sub> | NA | HSO <sub>3</sub> + FeC succsemial cis-aconitate              |
| 738 | FeCl <sub>3</sub>                  | HSO <sub>3</sub> | NA | HSO <sub>3</sub> + FeC succsemial cis-aconitate              |
| 739 | Fe(ClO <sub>4</sub> ) <sub>2</sub> | HSO <sub>3</sub> | NA | HSO <sub>3</sub> + Fe( succsemial cis-aconitate              |
| 740 | Fe(ClO <sub>4</sub> ) <sub>3</sub> | HSO <sub>3</sub> | NA | HSO <sub>3</sub> + Fe( succsemial cis-aconitate              |
| 741 | Fe Sulfide                         | HSO <sub>3</sub> | NA | HSO <sub>3</sub> + Fe : succsemial cis-aconitate             |
| 742 | Fe Acetate                         | HSO <sub>3</sub> | NA | HSO <sub>3</sub> + Fe . succsemial cis-aconitate             |
| 743 | Ferrocene                          | HSO <sub>3</sub> | NA | HSO <sub>3</sub> + Fer succsemial cis-aconitate              |
| 744 | control                            | HSO <sub>3</sub> | NA | HSO <sub>3</sub> + cor succsemial cis-aconitate              |
| 745 | FeCl <sub>2</sub>                  | DMSO             | NA | DMSO + Fe succsemial cis-aconitate                           |
| 746 | FeCl <sub>3</sub>                  | DMSO             | NA | DMSO + Fe succsemial cis-aconitate                           |
| 747 | Fe(ClO <sub>4</sub> ) <sub>2</sub> | DMSO             | NA | DMSO + Fe succsemial cis-aconitate                           |
| 748 | Fe(ClO <sub>4</sub> ) <sub>3</sub> | DMSO             | NA | DMSO + Fe succsemial cis-aconitate                           |
| 749 | Fe Sulfide                         | DMSO             | NA | DMSO + Fe succsemial cis-aconitate                           |
| 750 | Fe Acetate                         | DMSO             | NA | DMSO + Fe succsemial cis-aconitate                           |
| 751 | Ferrocene                          | DMSO             | NA | DMSO + Fe succsemial cis-aconitate                           |



|                                        |             |          |                                                  |
|----------------------------------------|-------------|----------|--------------------------------------------------|
| 752 control                            | DMSO        | NA       | DMSO + co succsemial cis-aconitate               |
| 753 FeCl <sub>2</sub>                  | Cys         | NA       | Cys + FeCl <sub>2</sub> succsemial cis-aconitate |
| 754 FeCl <sub>3</sub>                  | Cys         | NA       | Cys + FeCl <sub>3</sub> succsemial cis-aconitate |
| 755 Fe(ClO <sub>4</sub> ) <sub>2</sub> | Cys         | NA       | Cys + Fe(Cl succsemial cis-aconitate             |
| 756 Fe(ClO <sub>4</sub> ) <sub>3</sub> | Cys         | NA       | Cys + Fe(Cl succsemial cis-aconitate             |
| 757 Fe Sulfide                         | Cys         | NA       | Cys + Fe Su succsemial cis-aconitate             |
| 758 Fe Acetate                         | Cys         | NA       | Cys + Fe Ac succsemial cis-aconitate             |
| 759 Ferrocene                          | Cys         | NA       | Cys + Ferro succsemial cis-aconitate             |
| 760 control                            | Cys         | NA       | Cys + contr succsemial cis-aconitate             |
| 761 FeCl <sub>2</sub>                  | Methionin   | NA       | Methionin succsemial cis-aconitate               |
| 762 FeCl <sub>3</sub>                  | Methionin   | NA       | Methionin succsemial cis-aconitate               |
| 763 Fe(ClO <sub>4</sub> ) <sub>2</sub> | Methionin   | NA       | Methionin succsemial cis-aconitate               |
| 764 Fe(ClO <sub>4</sub> ) <sub>3</sub> | Methionin   | NA       | Methionin succsemial cis-aconitate               |
| 765 Fe Sulfide                         | Methionin   | NA       | Methionin succsemial cis-aconitate               |
| 766 Fe Acetate                         | Methionin   | NA       | Methionin succsemial cis-aconitate               |
| 767 Ferrocene                          | Methionin   | NA       | Methionin succsemial cis-aconitate               |
| 768 control                            | Methionin   | NA       | Methionin succsemial cis-aconitate               |
| 769 FeCl <sub>2</sub>                  | Homocyste   | NA       | Homocyste succsemial cis-aconitate               |
| 770 FeCl <sub>3</sub>                  | Homocyste   | NA       | Homocyste succsemial cis-aconitate               |
| 771 Fe(ClO <sub>4</sub> ) <sub>2</sub> | Homocyste   | NA       | Homocyste succsemial cis-aconitate               |
| 772 Fe(ClO <sub>4</sub> ) <sub>3</sub> | Homocyste   | NA       | Homocyste succsemial cis-aconitate               |
| 773 Fe Sulfide                         | Homocyste   | NA       | Homocyste succsemial cis-aconitate               |
| 774 Fe Acetate                         | Homocyste   | NA       | Homocyste succsemial cis-aconitate               |
| 775 Ferrocene                          | Homocyste   | NA       | Homocyste succsemial cis-aconitate               |
| 776 control                            | Homocyste   | NA       | Homocyste succsemial cis-aconitate               |
| 777 FeCl <sub>2</sub>                  | DL-Ethionir | NA       | DL-Ethionir succsemial cis-aconitate             |
| 778 FeCl <sub>3</sub>                  | DL-Ethionir | NA       | DL-Ethionir succsemial cis-aconitate             |
| 779 Fe(ClO <sub>4</sub> ) <sub>2</sub> | DL-Ethionir | NA       | DL-Ethionir succsemial cis-aconitate             |
| 780 Fe(ClO <sub>4</sub> ) <sub>3</sub> | DL-Ethionir | NA       | DL-Ethionir succsemial cis-aconitate             |
| 781 Fe Sulfide                         | DL-Ethionir | NA       | DL-Ethionir succsemial cis-aconitate             |
| 782 Fe Acetate                         | DL-Ethionir | NA       | DL-Ethionir succsemial cis-aconitate             |
| 783 Ferrocene                          | DL-Ethionir | NA       | DL-Ethionir succsemial cis-aconitate             |
| 784 control                            | DL-Ethionir | NA       | DL-Ethionir succsemial cis-aconitate             |
| 785 FeCl <sub>2</sub>                  | 2-Mercapt   | NA       | 2-Mercapt succsemial cis-aconitate               |
| 786 FeCl <sub>3</sub>                  | 2-Mercapt   | NA       | 2-Mercapt succsemial cis-aconitate               |
| 787 Fe(ClO <sub>4</sub> ) <sub>2</sub> | 2-Mercapt   | NA       | 2-Mercapt succsemial cis-aconitate               |
| 788 Fe(ClO <sub>4</sub> ) <sub>3</sub> | 2-Mercapt   | NA       | 2-Mercapt succsemial cis-aconitate               |
| 789 Fe Sulfide                         | 2-Mercapt   | NA       | 2-Mercapt succsemial cis-aconitate               |
| 790 Fe Acetate                         | 2-Mercapt   | NA       | 2-Mercapt succsemial cis-aconitate               |
| 791 Ferrocene                          | 2-Mercapt   | NA       | 2-Mercapt succsemial cis-aconitate               |
| 792 control                            | 2-Mercapt   | NA       | 2-Mercapt succsemial cis-aconitate               |
| 793 FeCl <sub>2</sub>                  | S2O8        | 0.7279   | S2O8 + FeC alphaketog citrate                    |
| 794 FeCl <sub>3</sub>                  | S2O8        | 0.779893 | S2O8 + FeC alphaketog citrate                    |
| 795 Fe(ClO <sub>4</sub> ) <sub>2</sub> | S2O8        | 0.506931 | S2O8 + Fe(α alphaketog citrate                   |
| 796 Fe(ClO <sub>4</sub> ) <sub>3</sub> | S2O8        | 0.792892 | S2O8 + Fe(α alphaketog citrate                   |
| 797 Fe Sulfide                         | S2O8        | 9.410713 | S2O8 + Fe β alphaketog citrate                   |
| 798 Fe Acetate                         | S2O8        | 0.246966 | S2O8 + Fe γ alphaketog citrate                   |

|                |         |          |                                             |
|----------------|---------|----------|---------------------------------------------|
| 799 Ferrocene  | S2O8    | 5.26428  | S2O8 + Fer alphaketog citrate               |
| 800 control    | S2O8    | 5.667225 | S2O8 + con alphaketog citrate               |
| 801 FeCl2      | control | -0.22097 | control + F <sub>r</sub> alphaketog citrate |
| 802 FeCl3      | control | -0.7539  | control + F <sub>r</sub> alphaketog citrate |
| 803 Fe(ClO4)2  | control | 0.454938 | control + F <sub>r</sub> alphaketog citrate |
| 804 Fe(ClO4)3  | control | -0.77989 | control + F <sub>r</sub> alphaketog citrate |
| 805 Fe Sulfide | control | -0.85788 | control + F <sub>r</sub> alphaketog citrate |
| 806 Fe Acetate | control | 0.194973 | control + F <sub>r</sub> alphaketog citrate |
| 807 Ferrocene  | control | -1.11785 | control + F <sub>r</sub> alphaketog citrate |
| 808 control    | control | -0.11698 | control + c <sub>r</sub> alphaketog citrate |
| 809 FeCl2      | SO4     | 0.571922 | SO4 + FeCl <sub>2</sub> alphaketog citrate  |
| 810 FeCl3      | SO4     | -0.58492 | SO4 + FeCl <sub>3</sub> alphaketog citrate  |
| 811 Fe(ClO4)2  | SO4     | -0.25996 | SO4 + Fe(C alphaketog citrate               |
| 812 Fe(ClO4)3  | SO4     | -0.35095 | SO4 + Fe(C alphaketog citrate               |
| 813 Fe Sulfide | SO4     | -0.59792 | SO4 + Fe S <sub>r</sub> alphaketog citrate  |
| 814 Fe Acetate | SO4     | 0.558924 | SO4 + Fe A <sub>r</sub> alphaketog citrate  |
| 815 Ferrocene  | SO4     | -0.62391 | SO4 + Ferr <sub>r</sub> alphaketog citrate  |
| 816 control    | SO4     | 0.402945 | SO4 + cont alphaketog citrate               |
| 817 FeCl2      | SO3     | -0.50693 | SO3 + FeCl <sub>2</sub> alphaketog citrate  |
| 818 FeCl3      | SO3     | 0.025996 | SO3 + FeCl <sub>3</sub> alphaketog citrate  |
| 819 Fe(ClO4)2  | SO3     | -0.10399 | SO3 + Fe(C alphaketog citrate               |
| 820 Fe(ClO4)3  | SO3     | -0.07799 | SO3 + Fe(C alphaketog citrate               |
| 821 Fe Sulfide | SO3     | 0.194973 | SO3 + Fe S <sub>r</sub> alphaketog citrate  |
| 822 Fe Acetate | SO3     | -0.51993 | SO3 + Fe A <sub>r</sub> alphaketog citrate  |
| 823 Ferrocene  | SO3     | -0.27296 | SO3 + Ferr <sub>r</sub> alphaketog citrate  |
| 824 control    | SO3     | -0.25996 | SO3 + cont alphaketog citrate               |
| 825 FeCl2      | HSO3    | -0.94887 | HSO3 + FeC alphaketog citrate               |
| 826 FeCl3      | HSO3    | -0.24697 | HSO3 + FeC alphaketog citrate               |
| 827 Fe(ClO4)2  | HSO3    | -0.12998 | HSO3 + Fe( alphaketog citrate               |
| 828 Fe(ClO4)3  | HSO3    | 0.051993 | HSO3 + Fe( alphaketog citrate               |
| 829 Fe Sulfide | HSO3    | 0.337954 | HSO3 + Fe <sub>r</sub> alphaketog citrate   |
| 830 Fe Acetate | HSO3    | 1.143844 | HSO3 + Fe <sub>r</sub> alphaketog citrate   |
| 831 Ferrocene  | HSO3    | 0.688906 | HSO3 + Fer alphaketog citrate               |
| 832 control    | HSO3    | 0.402945 | HSO3 + cor alphaketog citrate               |
| 833 FeCl2      | DMSO    | -0.46794 | DMSO + Fe alphaketog citrate                |
| 834 FeCl3      | DMSO    | -1.33882 | DMSO + Fe alphaketog citrate                |
| 835 Fe(ClO4)2  | DMSO    | -0.7669  | DMSO + Fe alphaketog citrate                |
| 836 Fe(ClO4)3  | DMSO    | -0.29896 | DMSO + Fe alphaketog citrate                |
| 837 Fe Sulfide | DMSO    | -0.42894 | DMSO + Fe alphaketog citrate                |
| 838 Fe Acetate | DMSO    | -0.29896 | DMSO + Fe alphaketog citrate                |
| 839 Ferrocene  | DMSO    | -0.7279  | DMSO + Fe alphaketog citrate                |
| 840 control    | DMSO    | -0.16898 | DMSO + co alphaketog citrate                |
| 841 FeCl2      | Cys     | -0.013   | Cys + FeCl <sub>2</sub> alphaketog citrate  |
| 842 FeCl3      | Cys     | -0.49393 | Cys + FeCl <sub>3</sub> alphaketog citrate  |
| 843 Fe(ClO4)2  | Cys     | -0.026   | Cys + Fe(Cl <sub>2</sub> alphaketog citrate |
| 844 Fe(ClO4)3  | Cys     | 0.129982 | Cys + Fe(Cl <sub>3</sub> alphaketog citrate |
| 845 Fe Sulfide | Cys     | 1.000863 | Cys + Fe Su alphaketog citrate              |

|     |                                    |             |          |             |                     |
|-----|------------------------------------|-------------|----------|-------------|---------------------|
| 846 | Fe Acetate                         | Cys         | -0.77989 | Cys + Fe Ac | alphaketog citrate  |
| 847 | Ferrocene                          | Cys         | 0.402945 | Cys + Ferro | alphaketog citrate  |
| 848 | control                            | Cys         | 0.22097  | Cys + contr | alphaketog citrate  |
| 849 | FeCl <sub>2</sub>                  | Methionine  | -0.40294 | Methionine  | alphaketog citrate  |
| 850 | FeCl <sub>3</sub>                  | Methionine  | 0.337954 | Methionine  | alphaketog citrate  |
| 851 | Fe(ClO <sub>4</sub> ) <sub>2</sub> | Methionine  | -0.61092 | Methionine  | alphaketog citrate  |
| 852 | Fe(ClO <sub>4</sub> ) <sub>3</sub> | Methionine  | 0.272963 | Methionine  | alphaketog citrate  |
| 853 | Fe Sulfide                         | Methionine  | -0.41594 | Methionine  | alphaketog citrate  |
| 854 | Fe Acetate                         | Methionine  | -0.45494 | Methionine  | alphaketog citrate  |
| 855 | Ferrocene                          | Methionine  | 0.649911 | Methionine  | alphaketog citrate  |
| 856 | control                            | Methionine  | 1.221833 | Methionine  | alphaketog citrate  |
| 857 | FeCl <sub>2</sub>                  | Homocyste   | -0.27296 | Homocyste   | alphaketog citrate  |
| 858 | FeCl <sub>3</sub>                  | Homocyste   | 0.090988 | Homocyste   | alphaketog citrate  |
| 859 | Fe(ClO <sub>4</sub> ) <sub>2</sub> | Homocyste   | 0.259964 | Homocyste   | alphaketog citrate  |
| 860 | Fe(ClO <sub>4</sub> ) <sub>3</sub> | Homocyste   | -1.06585 | Homocyste   | alphaketog citrate  |
| 861 | Fe Sulfide                         | Homocyste   | 1.156842 | Homocyste   | alphaketog citrate  |
| 862 | Fe Acetate                         | Homocyste   | -0.7409  | Homocyste   | alphaketog citrate  |
| 863 | Ferrocene                          | Homocyste   | -0.25996 | Homocyste   | alphaketog citrate  |
| 864 | control                            | Homocyste   | 0.649911 | Homocyste   | alphaketog citrate  |
| 865 | FeCl <sub>2</sub>                  | DL-Ethionir | -0.05199 | DL-Ethionir | alphaketog citrate  |
| 866 | FeCl <sub>3</sub>                  | DL-Ethionir | 0.454938 | DL-Ethionir | alphaketog citrate  |
| 867 | Fe(ClO <sub>4</sub> ) <sub>2</sub> | DL-Ethionir | -0.83189 | DL-Ethionir | alphaketog citrate  |
| 868 | Fe(ClO <sub>4</sub> ) <sub>3</sub> | DL-Ethionir | -0.7409  | DL-Ethionir | alphaketog citrate  |
| 869 | Fe Sulfide                         | DL-Ethionir | -0.94887 | DL-Ethionir | alphaketog citrate  |
| 870 | Fe Acetate                         | DL-Ethionir | 0.012998 | DL-Ethionir | alphaketog citrate  |
| 871 | Ferrocene                          | DL-Ethionir | 0.610916 | DL-Ethionir | alphaketog citrate  |
| 872 | control                            | DL-Ethionir | -0.88388 | DL-Ethionir | alphaketog citrate  |
| 873 | FeCl <sub>2</sub>                  | 2-Mercapt   | 0.233968 | 2-Mercapt   | alphaketog citrate  |
| 874 | FeCl <sub>3</sub>                  | 2-Mercapt   | -0.36395 | 2-Mercapt   | alphaketog citrate  |
| 875 | Fe(ClO <sub>4</sub> ) <sub>2</sub> | 2-Mercapt   | 0.792892 | 2-Mercapt   | alphaketog citrate  |
| 876 | Fe(ClO <sub>4</sub> ) <sub>3</sub> | 2-Mercapt   | 0.051993 | 2-Mercapt   | alphaketog citrate  |
| 877 | Fe Sulfide                         | 2-Mercapt   | 0.298959 | 2-Mercapt   | alphaketog citrate  |
| 878 | Fe Acetate                         | 2-Mercapt   | 0.649911 | 2-Mercapt   | alphaketog citrate  |
| 879 | Ferrocene                          | 2-Mercapt   | 0.688906 | 2-Mercapt   | alphaketog citrate  |
| 880 | control                            | 2-Mercapt   | 1.546788 | 2-Mercapt   | alphaketog citrate  |
| 881 | FeCl <sub>2</sub>                  | S2O8        | -0.57132 | S2O8 + FeC  | cisaconitat citrate |
| 882 | FeCl <sub>3</sub>                  | S2O8        | 0.02116  | S2O8 + FeC  | cisaconitat citrate |
| 883 | Fe(ClO <sub>4</sub> ) <sub>2</sub> | S2O8        | -1.44945 | S2O8 + Fe(  | cisaconitat citrate |
| 884 | Fe(ClO <sub>4</sub> ) <sub>3</sub> | S2O8        | 0.09522  | S2O8 + Fe(  | cisaconitat citrate |
| 885 | Fe Sulfide                         | S2O8        | -3.87226 | S2O8 + Fe   | cisaconitat citrate |
| 886 | Fe Acetate                         | S2O8        | 0.486678 | S2O8 + Fe   | cisaconitat citrate |
| 887 | Ferrocene                          | S2O8        | -4.13676 | S2O8 + Fer  | cisaconitat citrate |
| 888 | control                            | S2O8        | -1.05799 | S2O8 + con  | cisaconitat citrate |
| 889 | FeCl <sub>2</sub>                  | control     | -1.13205 | control + F | cisaconitat citrate |
| 890 | FeCl <sub>3</sub>                  | control     | 0.486678 | control + F | cisaconitat citrate |
| 891 | Fe(ClO <sub>4</sub> ) <sub>2</sub> | control     | 2.581507 | control + F | cisaconitat citrate |
| 892 | Fe(ClO <sub>4</sub> ) <sub>3</sub> | control     | -0.11638 | control + F | cisaconitat citrate |

|                                        |                  |          |                                             |
|----------------------------------------|------------------|----------|---------------------------------------------|
| 893 Fe Sulfide                         | control          | -1.93613 | control + Fe cisaconitat citrate            |
| 894 Fe Acetate                         | control          | 0.497258 | control + Fe cisaconitat citrate            |
| 895 Ferrocene                          | control          | -0.62422 | control + Fe cisaconitat citrate            |
| 896 control                            | control          | 0.528997 | control + c cisaconitat citrate             |
| 897 FeCl <sub>2</sub>                  | SO <sub>4</sub>  | -5.0678  | SO <sub>4</sub> + FeCl cisaconitat citrate  |
| 898 FeCl <sub>3</sub>                  | SO <sub>4</sub>  | 0.137539 | SO <sub>4</sub> + FeCl cisaconitat citrate  |
| 899 Fe(ClO <sub>4</sub> ) <sub>2</sub> | SO <sub>4</sub>  | -3.91458 | SO <sub>4</sub> + Fe(C cisaconitat citrate  |
| 900 Fe(ClO <sub>4</sub> ) <sub>3</sub> | SO <sub>4</sub>  | 0.01058  | SO <sub>4</sub> + Fe(C cisaconitat citrate  |
| 901 Fe Sulfide                         | SO <sub>4</sub>  | -0.94162 | SO <sub>4</sub> + Fe S cisaconitat citrate  |
| 902 Fe Acetate                         | SO <sub>4</sub>  | -0.27508 | SO <sub>4</sub> + Fe A cisaconitat citrate  |
| 903 Ferrocene                          | SO <sub>4</sub>  | 0.222179 | SO <sub>4</sub> + Ferro cisaconitat citrate |
| 904 control                            | SO <sub>4</sub>  | 0.899296 | SO <sub>4</sub> + cont cisaconitat citrate  |
| 905 FeCl <sub>2</sub>                  | SO <sub>3</sub>  | -3.6924  | SO <sub>3</sub> + FeCl cisaconitat citrate  |
| 906 FeCl <sub>3</sub>                  | SO <sub>3</sub>  | 0.126959 | SO <sub>3</sub> + FeCl cisaconitat citrate  |
| 907 Fe(ClO <sub>4</sub> ) <sub>2</sub> | SO <sub>3</sub>  | -3.35384 | SO <sub>3</sub> + Fe(C cisaconitat citrate  |
| 908 Fe(ClO <sub>4</sub> ) <sub>3</sub> | SO <sub>3</sub>  | -0.01058 | SO <sub>3</sub> + Fe(C cisaconitat citrate  |
| 909 Fe Sulfide                         | SO <sub>3</sub>  | -1.16379 | SO <sub>3</sub> + Fe S cisaconitat citrate  |
| 910 Fe Acetate                         | SO <sub>3</sub>  | -1.22727 | SO <sub>3</sub> + Fe A cisaconitat citrate  |
| 911 Ferrocene                          | SO <sub>3</sub>  | -1.03683 | SO <sub>3</sub> + Ferro cisaconitat citrate |
| 912 control                            | SO <sub>3</sub>  | 0.486678 | SO <sub>3</sub> + cont cisaconitat citrate  |
| 913 FeCl <sub>2</sub>                  | HSO <sub>3</sub> | 0.782916 | HSO <sub>3</sub> + Fe(C cisaconitat citrate |
| 914 FeCl <sub>3</sub>                  | HSO <sub>3</sub> | 0.03174  | HSO <sub>3</sub> + Fe(C cisaconitat citrate |
| 915 Fe(ClO <sub>4</sub> ) <sub>2</sub> | HSO <sub>3</sub> | -0.82524 | HSO <sub>3</sub> + Fe( cisaconitat citrate  |
| 916 Fe(ClO <sub>4</sub> ) <sub>3</sub> | HSO <sub>3</sub> | -0.40204 | HSO <sub>3</sub> + Fe( cisaconitat citrate  |
| 917 Fe Sulfide                         | HSO <sub>3</sub> | 0.751176 | HSO <sub>3</sub> + Fe cisaconitat citrate   |
| 918 Fe Acetate                         | HSO <sub>3</sub> | -0.07406 | HSO <sub>3</sub> + Fe cisaconitat citrate   |
| 919 Ferrocene                          | HSO <sub>3</sub> | 0.190439 | HSO <sub>3</sub> + Fer cisaconitat citrate  |
| 920 control                            | HSO <sub>3</sub> | 0.08464  | HSO <sub>3</sub> + cor cisaconitat citrate  |
| 921 FeCl <sub>2</sub>                  | DMSO             | 0.232759 | DMSO + Fe cisaconitat citrate               |
| 922 FeCl <sub>3</sub>                  | DMSO             | -0.9522  | DMSO + Fe cisaconitat citrate               |
| 923 Fe(ClO <sub>4</sub> ) <sub>2</sub> | DMSO             | 0.772336 | DMSO + Fe cisaconitat citrate               |
| 924 Fe(ClO <sub>4</sub> ) <sub>3</sub> | DMSO             | -0.64538 | DMSO + Fe cisaconitat citrate               |
| 925 Fe Sulfide                         | DMSO             | -1.83033 | DMSO + Fe cisaconitat citrate               |
| 926 Fe Acetate                         | DMSO             | 0.571317 | DMSO + Fe cisaconitat citrate               |
| 927 Ferrocene                          | DMSO             | -1.29075 | DMSO + Fe cisaconitat citrate               |
| 928 control                            | DMSO             | -0.14812 | DMSO + co cisaconitat citrate               |
| 929 FeCl <sub>2</sub>                  | Cys              | 0.105799 | Cys + FeCl <sub>2</sub> cisaconitat citrate |
| 930 FeCl <sub>3</sub>                  | Cys              | -0.0529  | Cys + FeCl <sub>3</sub> cisaconitat citrate |
| 931 Fe(ClO <sub>4</sub> ) <sub>2</sub> | Cys              | -0.92046 | Cys + Fe(Cl cisaconitat citrate             |
| 932 Fe(ClO <sub>4</sub> ) <sub>3</sub> | Cys              | -0.13754 | Cys + Fe(Cl cisaconitat citrate             |
| 933 Fe Sulfide                         | Cys              | -0.3703  | Cys + Fe Su cisaconitat citrate             |
| 934 Fe Acetate                         | Cys              | 0.317398 | Cys + Fe Ac cisaconitat citrate             |
| 935 Ferrocene                          | Cys              | 0.497258 | Cys + Ferro cisaconitat citrate             |
| 936 control                            | Cys              | 0.962775 | Cys + contr cisaconitat citrate             |
| 937 FeCl <sub>2</sub>                  | Methionin        | -0.7406  | Methionin cisaconitat citrate               |
| 938 FeCl <sub>3</sub>                  | Methionin        | 0.06348  | Methionin cisaconitat citrate               |
| 939 Fe(ClO <sub>4</sub> ) <sub>2</sub> | Methionin        | -0.77234 | Methionin cisaconitat citrate               |

|     |            |             |          |             |              |         |
|-----|------------|-------------|----------|-------------|--------------|---------|
| 940 | Fe(ClO4)3  | Methionine  | 0.158699 | Methionine  | cisacconitat | citrate |
| 941 | Fe Sulfide | Methionine  | 0.148119 | Methionine  | cisacconitat | citrate |
| 942 | Fe Acetate | Methionine  | 0.06348  | Methionine  | cisacconitat | citrate |
| 943 | Ferrocene  | Methionine  | 0.486678 | Methionine  | cisacconitat | citrate |
| 944 | control    | Methionine  | 1.491773 | Methionine  | cisacconitat | citrate |
| 945 | FeCl2      | Homocyste   | -0.01058 | Homocyste   | cisacconitat | citrate |
| 946 | FeCl3      | Homocyste   | 0.327978 | Homocyste   | cisacconitat | citrate |
| 947 | Fe(ClO4)2  | Homocyste   | 0.137539 | Homocyste   | cisacconitat | citrate |
| 948 | Fe(ClO4)3  | Homocyste   | -0.53958 | Homocyste   | cisacconitat | citrate |
| 949 | Fe Sulfide | Homocyste   | 0.169279 | Homocyste   | cisacconitat | citrate |
| 950 | Fe Acetate | Homocyste   | -0.29624 | Homocyste   | cisacconitat | citrate |
| 951 | Ferrocene  | Homocyste   | -0.55016 | Homocyste   | cisacconitat | citrate |
| 952 | control    | Homocyste   | 0.264499 | Homocyste   | cisacconitat | citrate |
| 953 | FeCl2      | DL-Ethionir | 0.08464  | DL-Ethionir | cisacconitat | citrate |
| 954 | FeCl3      | DL-Ethionir | 0.09522  | DL-Ethionir | cisacconitat | citrate |
| 955 | Fe(ClO4)2  | DL-Ethionir | -0.61364 | DL-Ethionir | cisacconitat | citrate |
| 956 | Fe(ClO4)3  | DL-Ethionir | 1.227274 | DL-Ethionir | cisacconitat | citrate |
| 957 | Fe Sulfide | DL-Ethionir | -0.3703  | DL-Ethionir | cisacconitat | citrate |
| 958 | Fe Acetate | DL-Ethionir | 0.423198 | DL-Ethionir | cisacconitat | citrate |
| 959 | Ferrocene  | DL-Ethionir | 0.380878 | DL-Ethionir | cisacconitat | citrate |
| 960 | control    | DL-Ethionir | 0.232759 | DL-Ethionir | cisacconitat | citrate |
| 961 | FeCl2      | 2-Mercapt   | 0.264499 | 2-Mercapt   | cisacconitat | citrate |
| 962 | FeCl3      | 2-Mercapt   | 0.835816 | 2-Mercapt   | cisacconitat | citrate |
| 963 | Fe(ClO4)2  | 2-Mercapt   | -0.39146 | 2-Mercapt   | cisacconitat | citrate |
| 964 | Fe(ClO4)3  | 2-Mercapt   | -0.09522 | 2-Mercapt   | cisacconitat | citrate |
| 965 | Fe Sulfide | 2-Mercapt   | -0.34914 | 2-Mercapt   | cisacconitat | citrate |
| 966 | Fe Acetate | 2-Mercapt   | -0.83582 | 2-Mercapt   | cisacconitat | citrate |
| 967 | Ferrocene  | 2-Mercapt   | -1.15321 | 2-Mercapt   | cisacconitat | citrate |
| 968 | control    | 2-Mercapt   | 0.952195 | 2-Mercapt   | cisacconitat | citrate |
| 969 | FeCl2      | S2O8        | 0.482633 | S2O8 + FeC  | citrate      | citrate |
| 970 | FeCl3      | S2O8        | -0.11041 | S2O8 + FeC  | citrate      | citrate |
| 971 | Fe(ClO4)2  | S2O8        | 0.165801 | S2O8 + Fe(  | citrate      | citrate |
| 972 | Fe(ClO4)3  | S2O8        | -1.49812 | S2O8 + Fe(  | citrate      | citrate |
| 973 | Fe Sulfide | S2O8        | -14.698  | S2O8 + Fe   | citrate      | citrate |
| 974 | Fe Acetate | S2O8        | -0.6008  | S2O8 + Fe   | citrate      | citrate |
| 975 | Ferrocene  | S2O8        | -9.75864 | S2O8 + Fer  | citrate      | citrate |
| 976 | control    | S2O8        | -20.3862 | S2O8 + con  | citrate      | citrate |
| 977 | FeCl2      | control     | 0.492972 | control + F | citrate      | citrate |
| 978 | FeCl3      | control     | 0.394747 | control + F | citrate      | citrate |
| 979 | Fe(ClO4)2  | control     | 0.85707  | control + F | citrate      | citrate |
| 980 | Fe(ClO4)3  | control     | 0.860763 | control + F | citrate      | citrate |
| 981 | Fe Sulfide | control     | -2.63916 | control + F | citrate      | citrate |
| 982 | Fe Acetate | control     | 0.590459 | control + F | citrate      | citrate |
| 983 | Ferrocene  | control     | -2.79129 | control + F | citrate      | citrate |
| 984 | control    | control     | 0.061668 | control + c | citrate      | citrate |
| 985 | FeCl2      | SO4         | -0.27806 | SO4 + FeCl  | citrate      | citrate |
| 986 | FeCl3      | SO4         | -0.38367 | SO4 + FeCl  | citrate      | citrate |

|      |            |           |          |             |         |
|------|------------|-----------|----------|-------------|---------|
| 987  | Fe(CIO4)2  | SO4       | -1.12959 | SO4 + Fe(C  | citrate |
| 988  | Fe(CIO4)3  | SO4       | -2.06753 | SO4 + Fe(C  | citrate |
| 989  | Fe Sulfide | SO4       | -13.6101 | SO4 + Fe S  | citrate |
| 990  | Fe Acetate | SO4       | -0.47082 | SO4 + Fe A  | citrate |
| 991  | Ferrocene  | SO4       | -10.2254 | SO4 + Ferr  | citrate |
| 992  | control    | SO4       | -10.3945 | SO4 + cont  | citrate |
| 993  | FeCl2      | SO3       | 0.197558 | SO3 + FeCl  | citrate |
| 994  | FeCl3      | SO3       | -0.86519 | SO3 + FeCl  | citrate |
| 995  | Fe(CIO4)2  | SO3       | -0.76918 | SO3 + Fe(C  | citrate |
| 996  | Fe(CIO4)3  | SO3       | -1.66946 | SO3 + Fe(C  | citrate |
| 997  | Fe Sulfide | SO3       | -14.4742 | SO3 + Fe S  | citrate |
| 998  | Fe Acetate | SO3       | 0.028434 | SO3 + Fe A  | citrate |
| 999  | Ferrocene  | SO3       | -12.4174 | SO3 + Ferr  | citrate |
| 1000 | control    | SO3       | -15.4262 | SO3 + cont  | citrate |
| 1001 | FeCl2      | HSO3      | -0.67761 | HSO3 + Fe(C | citrate |
| 1002 | FeCl3      | HSO3      | -1.05352 | HSO3 + Fe(C | citrate |
| 1003 | Fe(CIO4)2  | HSO3      | -2.69307 | HSO3 + Fe(  | citrate |
| 1004 | Fe(CIO4)3  | HSO3      | -2.23148 | HSO3 + Fe(  | citrate |
| 1005 | Fe Sulfide | HSO3      | -16.0679 | HSO3 + Fe   | citrate |
| 1006 | Fe Acetate | HSO3      | -0.37924 | HSO3 + Fe   | citrate |
| 1007 | Ferrocene  | HSO3      | -14.3671 | HSO3 + Fer  | citrate |
| 1008 | control    | HSO3      | -13.1744 | HSO3 + cor  | citrate |
| 1009 | FeCl2      | DMSO      | 0.390316 | DMSO + Fe   | citrate |
| 1010 | FeCl3      | DMSO      | 0.450876 | DMSO + Fe   | citrate |
| 1011 | Fe(CIO4)2  | DMSO      | 0.450137 | DMSO + Fe   | citrate |
| 1012 | Fe(CIO4)3  | DMSO      | 0.463431 | DMSO + Fe   | citrate |
| 1013 | Fe Sulfide | DMSO      | -7.06963 | DMSO + Fe   | citrate |
| 1014 | Fe Acetate | DMSO      | 0.453091 | DMSO + Fe   | citrate |
| 1015 | Ferrocene  | DMSO      | -12.1973 | DMSO + Fe   | citrate |
| 1016 | control    | DMSO      | -4.46777 | DMSO + co   | citrate |
| 1017 | FeCl2      | Cys       | 0.354866 | Cys + FeCl2 | citrate |
| 1018 | FeCl3      | Cys       | 0.348958 | Cys + FeCl3 | citrate |
| 1019 | Fe(CIO4)2  | Cys       | 0.33788  | Cys + Fe(Cl | citrate |
| 1020 | Fe(CIO4)3  | Cys       | 0.323109 | Cys + Fe(Cl | citrate |
| 1021 | Fe Sulfide | Cys       | -0.57864 | Cys + Fe Su | citrate |
| 1022 | Fe Acetate | Cys       | 0.421334 | Cys + Fe Ac | citrate |
| 1023 | Ferrocene  | Cys       | -0.02843 | Cys + Ferro | citrate |
| 1024 | control    | Cys       | 0.962681 | Cys + contr | citrate |
| 1025 | FeCl2      | Methionin | 0.34305  | Methionin   | citrate |
| 1026 | FeCl3      | Methionin | 0.425766 | Methionin   | citrate |
| 1027 | Fe(CIO4)2  | Methionin | 0.419857 | Methionin   | citrate |
| 1028 | Fe(CIO4)3  | Methionin | 0.142168 | Methionin   | citrate |
| 1029 | Fe Sulfide | Methionin | -0.85264 | Methionin   | citrate |
| 1030 | Fe Acetate | Methionin | 0.294306 | Methionin   | citrate |
| 1031 | Ferrocene  | Methionin | 0.408041 | Methionin   | citrate |
| 1032 | control    | Methionin | -0.58307 | Methionin   | citrate |
| 1033 | FeCl2      | Homocyste | 0.369637 | Homocyste   | citrate |

|      |            |             |          |                       |         |
|------|------------|-------------|----------|-----------------------|---------|
| 1034 | FeCl3      | Homocyste   | 0.385885 | Homocyste citrate     | citrate |
| 1035 | Fe(ClO4)2  | Homocyste   | 0.303907 | Homocyste citrate     | citrate |
| 1036 | Fe(ClO4)3  | Homocyste   | 0.378499 | Homocyste citrate     | citrate |
| 1037 | Fe Sulfide | Homocyste   | -0.83565 | Homocyste citrate     | citrate |
| 1038 | Fe Acetate | Homocyste   | 0.36816  | Homocyste citrate     | citrate |
| 1039 | Ferrocene  | Homocyste   | 0.031388 | Homocyste citrate     | citrate |
| 1040 | control    | Homocyste   | -0.21528 | Homocyste citrate     | citrate |
| 1041 | FeCl2      | DL-Ethionir | 0.366683 | DL-Ethionir citrate   | citrate |
| 1042 | FeCl3      | DL-Ethionir | 0.334187 | DL-Ethionir citrate   | citrate |
| 1043 | Fe(ClO4)2  | DL-Ethionir | 0.33271  | DL-Ethionir citrate   | citrate |
| 1044 | Fe(ClO4)3  | DL-Ethionir | 0.405825 | DL-Ethionir citrate   | citrate |
| 1045 | Fe Sulfide | DL-Ethionir | -1.00478 | DL-Ethionir citrate   | citrate |
| 1046 | Fe Acetate | DL-Ethionir | 0.436844 | DL-Ethionir citrate   | citrate |
| 1047 | Ferrocene  | DL-Ethionir | -1.44051 | DL-Ethionir citrate   | citrate |
| 1048 | control    | DL-Ethionir | -1.95527 | DL-Ethionir citrate   | citrate |
| 1049 | FeCl2      | 2-Mercapt   | 0.367421 | 2-Mercapt citrate     | citrate |
| 1050 | FeCl3      | 2-Mercapt   | 0.391054 | 2-Mercapt citrate     | citrate |
| 1051 | Fe(ClO4)2  | 2-Mercapt   | 0.456784 | 2-Mercapt citrate     | citrate |
| 1052 | Fe(ClO4)3  | 2-Mercapt   | 0.390316 | 2-Mercapt citrate     | citrate |
| 1053 | Fe Sulfide | 2-Mercapt   | -0.1237  | 2-Mercapt citrate     | citrate |
| 1054 | Fe Acetate | 2-Mercapt   | 0.432412 | 2-Mercapt citrate     | citrate |
| 1055 | Ferrocene  | 2-Mercapt   | -0.05428 | 2-Mercapt citrate     | citrate |
| 1056 | control    | 2-Mercapt   | -4.78239 | 2-Mercapt citrate     | citrate |
| 1057 | FeCl2      | S2O8        | 0.792135 | S2O8 + FeC fumarate   | citrate |
| 1058 | FeCl3      | S2O8        | 1.088925 | S2O8 + FeC fumarate   | citrate |
| 1059 | Fe(ClO4)2  | S2O8        | 0.424283 | S2O8 + Fe(i fumarate  | citrate |
| 1060 | Fe(ClO4)3  | S2O8        | 0.011844 | S2O8 + Fe(i fumarate  | citrate |
| 1061 | Fe Sulfide | S2O8        | -0.17069 | S2O8 + Fe ! fumarate  | citrate |
| 1062 | Fe Acetate | S2O8        | -0.2097  | S2O8 + Fe / fumarate  | citrate |
| 1063 | Ferrocene  | S2O8        | 0.126101 | S2O8 + Fer fumarate   | citrate |
| 1064 | control    | S2O8        | -0.43682 | S2O8 + con fumarate   | citrate |
| 1065 | FeCl2      | control     | 0.186016 | control + Fi fumarate | citrate |
| 1066 | FeCl3      | control     | -0.32396 | control + Fi fumarate | citrate |
| 1067 | Fe(ClO4)2  | control     | -0.05086 | control + Fi fumarate | citrate |
| 1068 | Fe(ClO4)3  | control     | -3.00482 | control + Fi fumarate | citrate |
| 1069 | Fe Sulfide | control     | -0.34068 | control + Fi fumarate | citrate |
| 1070 | Fe Acetate | control     | -0.36019 | control + Fi fumarate | citrate |
| 1071 | Ferrocene  | control     | 0.339287 | control + Fi fumarate | citrate |
| 1072 | control    | control     | 0.31978  | control + ci fumarate | citrate |
| 1073 | FeCl2      | SO4         | -0.11495 | SO4 + FeCl: fumarate  | citrate |
| 1074 | FeCl3      | SO4         | -1.28539 | SO4 + FeCl: fumarate  | citrate |
| 1075 | Fe(ClO4)2  | SO4         | 0.31978  | SO4 + Fe(C fumarate   | citrate |
| 1076 | Fe(ClO4)3  | SO4         | -1.82184 | SO4 + Fe(C fumarate   | citrate |
| 1077 | Fe Sulfide | SO4         | -0.61378 | SO4 + Fe Si fumarate  | citrate |
| 1078 | Fe Acetate | SO4         | -0.18323 | SO4 + Fe Ai fumarate  | citrate |
| 1079 | Ferrocene  | SO4         | 0.544114 | SO4 + Ferr: fumarate  | citrate |
| 1080 | control    | SO4         | 0.41871  | SO4 + cont fumarate   | citrate |

|      |            |           |          |             |          |         |
|------|------------|-----------|----------|-------------|----------|---------|
| 1081 | FeCl2      | SO3       | -0.10938 | SO3 + FeCl  | fumarate | citrate |
| 1082 | FeCl3      | SO3       | -1.53899 | SO3 + FeCl  | fumarate | citrate |
| 1083 | Fe(ClO4)2  | SO3       | 0.473052 | SO3 + Fe(C  | fumarate | citrate |
| 1084 | Fe(ClO4)3  | SO3       | -2.43214 | SO3 + Fe(C  | fumarate | citrate |
| 1085 | Fe Sulfide | SO3       | -0.54133 | SO3 + Fe S  | fumarate | citrate |
| 1086 | Fe Acetate | SO3       | -1.00254 | SO3 + Fe A  | fumarate | citrate |
| 1087 | Ferrocene  | SO3       | 0.226424 | SO3 + Ferr  | fumarate | citrate |
| 1088 | control    | SO3       | -0.232   | SO3 + cont  | fumarate | citrate |
| 1089 | FeCl2      | HSO3      | -0.65976 | HSO3 + FeC  | fumarate | citrate |
| 1090 | FeCl3      | HSO3      | -0.80746 | HSO3 + FeC  | fumarate | citrate |
| 1091 | Fe(ClO4)2  | HSO3      | -2.28584 | HSO3 + Fe(  | fumarate | citrate |
| 1092 | Fe(ClO4)3  | HSO3      | -0.91754 | HSO3 + Fe(  | fumarate | citrate |
| 1093 | Fe Sulfide | HSO3      | -0.2738  | HSO3 + Fe   | fumarate | citrate |
| 1094 | Fe Acetate | HSO3      | 0.892458 | HSO3 + Fe   | fumarate | citrate |
| 1095 | Ferrocene  | HSO3      | 0.496739 | HSO3 + Fer  | fumarate | citrate |
| 1096 | control    | HSO3      | 0.283552 | HSO3 + cor  | fumarate | citrate |
| 1097 | FeCl2      | DMSO      | 0.172082 | DMSO + Fe   | fumarate | citrate |
| 1098 | FeCl3      | DMSO      | -0.67091 | DMSO + Fe   | fumarate | citrate |
| 1099 | Fe(ClO4)2  | DMSO      | 0.081513 | DMSO + Fe   | fumarate | citrate |
| 1100 | Fe(ClO4)3  | DMSO      | -2.55894 | DMSO + Fe   | fumarate | citrate |
| 1101 | Fe Sulfide | DMSO      | -0.06619 | DMSO + Fe   | fumarate | citrate |
| 1102 | Fe Acetate | DMSO      | -0.15118 | DMSO + Fe   | fumarate | citrate |
| 1103 | Ferrocene  | DMSO      | 0.073152 | DMSO + Fe   | fumarate | citrate |
| 1104 | control    | DMSO      | 0.40617  | DMSO + co   | fumarate | citrate |
| 1105 | FeCl2      | Cys       | 0.038318 | Cys + FeCl2 | fumarate | citrate |
| 1106 | FeCl3      | Cys       | -0.88131 | Cys + FeCl3 | fumarate | citrate |
| 1107 | Fe(ClO4)2  | Cys       | -1.29932 | Cys + Fe(Cl | fumarate | citrate |
| 1108 | Fe(ClO4)3  | Cys       | 0.888278 | Cys + Fe(Cl | fumarate | citrate |
| 1109 | Fe Sulfide | Cys       | 0.683452 | Cys + Fe Su | fumarate | citrate |
| 1110 | Fe Acetate | Cys       | -0.15118 | Cys + Fe Ac | fumarate | citrate |
| 1111 | Ferrocene  | Cys       | 0.318387 | Cys + Ferro | fumarate | citrate |
| 1112 | control    | Cys       | 0.638864 | Cys + contr | fumarate | citrate |
| 1113 | FeCl2      | Methionin | 0.592882 | Methionin   | fumarate | citrate |
| 1114 | FeCl3      | Methionin | 0.495346 | Methionin   | fumarate | citrate |
| 1115 | Fe(ClO4)2  | Methionin | -0.89664 | Methionin   | fumarate | citrate |
| 1116 | Fe(ClO4)3  | Methionin | -1.05688 | Methionin   | fumarate | citrate |
| 1117 | Fe Sulfide | Methionin | 0.10938  | Methionin   | fumarate | citrate |
| 1118 | Fe Acetate | Methionin | 0.665338 | Methionin   | fumarate | citrate |
| 1119 | Ferrocene  | Methionin | 0.63329  | Methionin   | fumarate | citrate |
| 1120 | control    | Methionin | 1.012289 | Methionin   | fumarate | citrate |
| 1121 | FeCl2      | Homocyste | 0.091266 | Homocyste   | fumarate | citrate |
| 1122 | FeCl3      | Homocyste | 0.721073 | Homocyste   | fumarate | citrate |
| 1123 | Fe(ClO4)2  | Homocyste | -0.80328 | Homocyste   | fumarate | citrate |
| 1124 | Fe(ClO4)3  | Homocyste | -1.14327 | Homocyste   | fumarate | citrate |
| 1125 | Fe Sulfide | Homocyste | 0.702959 | Homocyste   | fumarate | citrate |
| 1126 | Fe Acetate | Homocyste | 0.09684  | Homocyste   | fumarate | citrate |
| 1127 | Ferrocene  | Homocyste | 0.860411 | Homocyste   | fumarate | citrate |



|      |            |             |          |                      |         |
|------|------------|-------------|----------|----------------------|---------|
| 1128 | control    | Homocyste   | 0.236178 | Homocyste fumarate   | citrate |
| 1129 | FeCl2      | DL-Ethionir | 0.259865 | DL-Ethionir fumarate | citrate |
| 1130 | FeCl3      | DL-Ethionir | 0.275192 | DL-Ethionir fumarate | citrate |
| 1131 | Fe(ClO4)2  | DL-Ethionir | -0.20831 | DL-Ethionir fumarate | citrate |
| 1132 | Fe(ClO4)3  | DL-Ethionir | -1.44284 | DL-Ethionir fumarate | citrate |
| 1133 | Fe Sulfide | DL-Ethionir | 0.060612 | DL-Ethionir fumarate | citrate |
| 1134 | Fe Acetate | DL-Ethionir | 0.721073 | DL-Ethionir fumarate | citrate |
| 1135 | Ferrocene  | DL-Ethionir | 0.50928  | DL-Ethionir fumarate | citrate |
| 1136 | control    | DL-Ethionir | 0.082906 | DL-Ethionir fumarate | citrate |
| 1137 | FeCl2      | 2-Mercapt   | 0.025777 | 2-Mercapt fumarate   | citrate |
| 1138 | FeCl3      | 2-Mercapt   | -1.39129 | 2-Mercapt fumarate   | citrate |
| 1139 | Fe(ClO4)2  | 2-Mercapt   | -0.01881 | 2-Mercapt fumarate   | citrate |
| 1140 | Fe(ClO4)3  | 2-Mercapt   | 0.499526 | 2-Mercapt fumarate   | citrate |
| 1141 | Fe Sulfide | 2-Mercapt   | 0.30306  | 2-Mercapt fumarate   | citrate |
| 1142 | Fe Acetate | 2-Mercapt   | 0.042498 | 2-Mercapt fumarate   | citrate |
| 1143 | Ferrocene  | 2-Mercapt   | 0.666731 | 2-Mercapt fumarate   | citrate |
| 1144 | control    | 2-Mercapt   | -0.48699 | 2-Mercapt fumarate   | citrate |
| 1145 | FeCl2      | S2O8        | -2.41835 | S2O8 + FeC malate    | citrate |
| 1146 | FeCl3      | S2O8        | 0.670435 | S2O8 + FeC malate    | citrate |
| 1147 | Fe(ClO4)2  | S2O8        | 0.478882 | S2O8 + Fe(C malate   | citrate |
| 1148 | Fe(ClO4)3  | S2O8        | 0.071832 | S2O8 + Fe(C malate   | citrate |
| 1149 | Fe Sulfide | S2O8        | 0.263385 | S2O8 + Fe S malate   | citrate |
| 1150 | Fe Acetate | S2O8        | 0.52677  | S2O8 + Fe A malate   | citrate |
| 1151 | Ferrocene  | S2O8        | 0.143665 | S2O8 + Fer malate    | citrate |
| 1152 | control    | S2O8        | -1.43665 | S2O8 + con malate    | citrate |
| 1153 | FeCl2      | control     | -0.35916 | control + F malate   | citrate |
| 1154 | FeCl3      | control     | -0.31127 | control + F malate   | citrate |
| 1155 | Fe(ClO4)2  | control     | 0.909876 | control + F malate   | citrate |
| 1156 | Fe(ClO4)3  | control     | -0.95776 | control + F malate   | citrate |
| 1157 | Fe Sulfide | control     | -1.91553 | control + F malate   | citrate |
| 1158 | Fe Acetate | control     | 0.550714 | control + F malate   | citrate |
| 1159 | Ferrocene  | control     | -0.57466 | control + F malate   | citrate |
| 1160 | control    | control     | 2.083136 | control + c malate   | citrate |
| 1161 | FeCl2      | SO4         | -0.33522 | SO4 + FeCl malate    | citrate |
| 1162 | FeCl3      | SO4         | -0.26339 | SO4 + FeCl malate    | citrate |
| 1163 | Fe(ClO4)2  | SO4         | -1.67609 | SO4 + Fe(C malate    | citrate |
| 1164 | Fe(ClO4)3  | SO4         | -1.36481 | SO4 + Fe(C malate    | citrate |
| 1165 | Fe Sulfide | SO4         | -3.18456 | SO4 + Fe S malate    | citrate |
| 1166 | Fe Acetate | SO4         | -0.5986  | SO4 + Fe A malate    | citrate |
| 1167 | Ferrocene  | SO4         | -1.07748 | SO4 + Ferr malate    | citrate |
| 1168 | control    | SO4         | 0.167609 | SO4 + cont malate    | citrate |
| 1169 | FeCl2      | SO3         | 0.071832 | SO3 + FeCl malate    | citrate |
| 1170 | FeCl3      | SO3         | -0.16761 | SO3 + FeCl malate    | citrate |
| 1171 | Fe(ClO4)2  | SO3         | -1.48453 | SO3 + Fe(C malate    | citrate |
| 1172 | Fe(ClO4)3  | SO3         | -2.0113  | SO3 + Fe(C malate    | citrate |
| 1173 | Fe Sulfide | SO3         | -0.50283 | SO3 + Fe S malate    | citrate |
| 1174 | Fe Acetate | SO3         | -0.23944 | SO3 + Fe A malate    | citrate |

|      |            |             |          |                    |         |
|------|------------|-------------|----------|--------------------|---------|
| 1175 | Ferrocene  | SO3         | -2.08314 | SO3 + Ferr( malate | citrate |
| 1176 | control    | SO3         | -0.86199 | SO3 + cont malate  | citrate |
| 1177 | FeCl2      | HSO3        | -1.05354 | HSO3 + Fe( malate  | citrate |
| 1178 | FeCl3      | HSO3        | 0.095776 | HSO3 + Fe( malate  | citrate |
| 1179 | Fe(ClO4)2  | HSO3        | -1.60425 | HSO3 + Fe( malate  | citrate |
| 1180 | Fe(ClO4)3  | HSO3        | -0.40705 | HSO3 + Fe( malate  | citrate |
| 1181 | Fe Sulfide | HSO3        | 0        | HSO3 + Fe : malate | citrate |
| 1182 | Fe Acetate | HSO3        | 0.838043 | HSO3 + Fe . malate | citrate |
| 1183 | Ferrocene  | HSO3        | -1.12537 | HSO3 + Fer malate  | citrate |
| 1184 | control    | HSO3        | -0.14366 | HSO3 + cor malate  | citrate |
| 1185 | FeCl2      | DMSO        | 0.167609 | DMSO + Fe malate   | citrate |
| 1186 | FeCl3      | DMSO        | -0.14366 | DMSO + Fe malate   | citrate |
| 1187 | Fe(ClO4)2  | DMSO        | 0.383106 | DMSO + Fe malate   | citrate |
| 1188 | Fe(ClO4)3  | DMSO        | -1.17326 | DMSO + Fe malate   | citrate |
| 1189 | Fe Sulfide | DMSO        | -1.6282  | DMSO + Fe malate   | citrate |
| 1190 | Fe Acetate | DMSO        | 0.239441 | DMSO + Fe malate   | citrate |
| 1191 | Ferrocene  | DMSO        | -1.17326 | DMSO + Fe malate   | citrate |
| 1192 | control    | DMSO        | 0.167609 | DMSO + co malate   | citrate |
| 1193 | FeCl2      | Cys         | -0.31127 | Cys + FeCl2 malate | citrate |
| 1194 | FeCl3      | Cys         | 0.40705  | Cys + FeCl3 malate | citrate |
| 1195 | Fe(ClO4)2  | Cys         | -0.98171 | Cys + Fe(Cl malate | citrate |
| 1196 | Fe(ClO4)3  | Cys         | 0.383106 | Cys + Fe(Cl malate | citrate |
| 1197 | Fe Sulfide | Cys         | -0.38311 | Cys + Fe Su malate | citrate |
| 1198 | Fe Acetate | Cys         | 0.263385 | Cys + Fe Ac malate | citrate |
| 1199 | Ferrocene  | Cys         | 0.814099 | Cys + Ferro malate | citrate |
| 1200 | control    | Cys         | 1.436646 | Cys + contr malate | citrate |
| 1201 | FeCl2      | Methionin   | 0.263385 | Methionin malate   | citrate |
| 1202 | FeCl3      | Methionin   | 0.885931 | Methionin malate   | citrate |
| 1203 | Fe(ClO4)2  | Methionin   | 0.071832 | Methionin malate   | citrate |
| 1204 | Fe(ClO4)3  | Methionin   | -0.57466 | Methionin malate   | citrate |
| 1205 | Fe Sulfide | Methionin   | -0.43099 | Methionin malate   | citrate |
| 1206 | Fe Acetate | Methionin   | 0.766211 | Methionin malate   | citrate |
| 1207 | Ferrocene  | Methionin   | 0.742267 | Methionin malate   | citrate |
| 1208 | control    | Methionin   | 0.93382  | Methionin malate   | citrate |
| 1209 | FeCl2      | Homocyste   | 0.023944 | Homocyste malate   | citrate |
| 1210 | FeCl3      | Homocyste   | 0.790155 | Homocyste malate   | citrate |
| 1211 | Fe(ClO4)2  | Homocyste   | -0.55071 | Homocyste malate   | citrate |
| 1212 | Fe(ClO4)3  | Homocyste   | -0.28733 | Homocyste malate   | citrate |
| 1213 | Fe Sulfide | Homocyste   | 0.742267 | Homocyste malate   | citrate |
| 1214 | Fe Acetate | Homocyste   | 0.454938 | Homocyste malate   | citrate |
| 1215 | Ferrocene  | Homocyste   | 0.814099 | Homocyste malate   | citrate |
| 1216 | control    | Homocyste   | 0.023944 | Homocyste malate   | citrate |
| 1217 | FeCl2      | DL-Ethionir | 0.40705  | DL-Ethionir malate | citrate |
| 1218 | FeCl3      | DL-Ethionir | 0.550714 | DL-Ethionir malate | citrate |
| 1219 | Fe(ClO4)2  | DL-Ethionir | 0        | DL-Ethionir malate | citrate |
| 1220 | Fe(ClO4)3  | DL-Ethionir | -0.50283 | DL-Ethionir malate | citrate |
| 1221 | Fe Sulfide | DL-Ethionir | -0.26339 | DL-Ethionir malate | citrate |

|      |                                    |                               |          |                                                 |         |
|------|------------------------------------|-------------------------------|----------|-------------------------------------------------|---------|
| 1222 | Fe Acetate                         | DL-Ethionir                   | 0.550714 | DL-Ethionir malate                              | citrate |
| 1223 | Ferrocene                          | DL-Ethionir                   | -0.33522 | DL-Ethionir malate                              | citrate |
| 1224 | control                            | DL-Ethionir                   | 0.263385 | DL-Ethionir malate                              | citrate |
| 1225 | FeCl <sub>2</sub>                  | 2-Mercapti                    | 0.239441 | 2-Mercapti malate                               | citrate |
| 1226 | FeCl <sub>3</sub>                  | 2-Mercapti                    | -0.23944 | 2-Mercapti malate                               | citrate |
| 1227 | Fe(ClO <sub>4</sub> ) <sub>2</sub> | 2-Mercapti                    | 0.311273 | 2-Mercapti malate                               | citrate |
| 1228 | Fe(ClO <sub>4</sub> ) <sub>3</sub> | 2-Mercapti                    | -0.31127 | 2-Mercapti malate                               | citrate |
| 1229 | Fe Sulfide                         | 2-Mercapti                    | 0.502826 | 2-Mercapti malate                               | citrate |
| 1230 | Fe Acetate                         | 2-Mercapti                    | 0.215497 | 2-Mercapti malate                               | citrate |
| 1231 | Ferrocene                          | 2-Mercapti                    | 0.646491 | 2-Mercapti malate                               | citrate |
| 1232 | control                            | 2-Mercapti                    | -0.02394 | 2-Mercapti malate                               | citrate |
| 1233 | FeCl <sub>2</sub>                  | S <sub>2</sub> O <sub>8</sub> | NA       | S <sub>2</sub> O <sub>8</sub> + FeC oxaloaceta  | citrate |
| 1234 | FeCl <sub>3</sub>                  | S <sub>2</sub> O <sub>8</sub> | NA       | S <sub>2</sub> O <sub>8</sub> + FeC oxaloaceta  | citrate |
| 1235 | Fe(ClO <sub>4</sub> ) <sub>2</sub> | S <sub>2</sub> O <sub>8</sub> | NA       | S <sub>2</sub> O <sub>8</sub> + Fe(i oxaloaceta | citrate |
| 1236 | Fe(ClO <sub>4</sub> ) <sub>3</sub> | S <sub>2</sub> O <sub>8</sub> | NA       | S <sub>2</sub> O <sub>8</sub> + Fe(i oxaloaceta | citrate |
| 1237 | Fe Sulfide                         | S <sub>2</sub> O <sub>8</sub> | Inf      | S <sub>2</sub> O <sub>8</sub> + Fe ! oxaloaceta | citrate |
| 1238 | Fe Acetate                         | S <sub>2</sub> O <sub>8</sub> | #NAME?   | S <sub>2</sub> O <sub>8</sub> + Fe / oxaloaceta | citrate |
| 1239 | Ferrocene                          | S <sub>2</sub> O <sub>8</sub> | Inf      | S <sub>2</sub> O <sub>8</sub> + Fer oxaloaceta  | citrate |
| 1240 | control                            | S <sub>2</sub> O <sub>8</sub> | Inf      | S <sub>2</sub> O <sub>8</sub> + con oxaloaceta  | citrate |
| 1241 | FeCl <sub>2</sub>                  | control                       | NA       | control + Fi oxaloaceta                         | citrate |
| 1242 | FeCl <sub>3</sub>                  | control                       | NA       | control + Fi oxaloaceta                         | citrate |
| 1243 | Fe(ClO <sub>4</sub> ) <sub>2</sub> | control                       | NA       | control + Fi oxaloaceta                         | citrate |
| 1244 | Fe(ClO <sub>4</sub> ) <sub>3</sub> | control                       | NA       | control + Fi oxaloaceta                         | citrate |
| 1245 | Fe Sulfide                         | control                       | NA       | control + Fi oxaloaceta                         | citrate |
| 1246 | Fe Acetate                         | control                       | NA       | control + Fi oxaloaceta                         | citrate |
| 1247 | Ferrocene                          | control                       | NA       | control + Fi oxaloaceta                         | citrate |
| 1248 | control                            | control                       | NA       | control + ci oxaloaceta                         | citrate |
| 1249 | FeCl <sub>2</sub>                  | SO <sub>4</sub>               | NA       | SO <sub>4</sub> + FeCl: oxaloaceta              | citrate |
| 1250 | FeCl <sub>3</sub>                  | SO <sub>4</sub>               | NA       | SO <sub>4</sub> + FeCl: oxaloaceta              | citrate |
| 1251 | Fe(ClO <sub>4</sub> ) <sub>2</sub> | SO <sub>4</sub>               | NA       | SO <sub>4</sub> + Fe(C oxaloaceta               | citrate |
| 1252 | Fe(ClO <sub>4</sub> ) <sub>3</sub> | SO <sub>4</sub>               | NA       | SO <sub>4</sub> + Fe(C oxaloaceta               | citrate |
| 1253 | Fe Sulfide                         | SO <sub>4</sub>               | NA       | SO <sub>4</sub> + Fe Si oxaloaceta              | citrate |
| 1254 | Fe Acetate                         | SO <sub>4</sub>               | NA       | SO <sub>4</sub> + Fe A: oxaloaceta              | citrate |
| 1255 | Ferrocene                          | SO <sub>4</sub>               | NA       | SO <sub>4</sub> + Ferr: oxaloaceta              | citrate |
| 1256 | control                            | SO <sub>4</sub>               | NA       | SO <sub>4</sub> + cont oxaloaceta               | citrate |
| 1257 | FeCl <sub>2</sub>                  | SO <sub>3</sub>               | NA       | SO <sub>3</sub> + FeCl: oxaloaceta              | citrate |
| 1258 | FeCl <sub>3</sub>                  | SO <sub>3</sub>               | NA       | SO <sub>3</sub> + FeCl: oxaloaceta              | citrate |
| 1259 | Fe(ClO <sub>4</sub> ) <sub>2</sub> | SO <sub>3</sub>               | NA       | SO <sub>3</sub> + Fe(C oxaloaceta               | citrate |
| 1260 | Fe(ClO <sub>4</sub> ) <sub>3</sub> | SO <sub>3</sub>               | NA       | SO <sub>3</sub> + Fe(C oxaloaceta               | citrate |
| 1261 | Fe Sulfide                         | SO <sub>3</sub>               | NA       | SO <sub>3</sub> + Fe Si oxaloaceta              | citrate |
| 1262 | Fe Acetate                         | SO <sub>3</sub>               | NA       | SO <sub>3</sub> + Fe A: oxaloaceta              | citrate |
| 1263 | Ferrocene                          | SO <sub>3</sub>               | NA       | SO <sub>3</sub> + Ferr: oxaloaceta              | citrate |
| 1264 | control                            | SO <sub>3</sub>               | NA       | SO <sub>3</sub> + cont oxaloaceta               | citrate |
| 1265 | FeCl <sub>2</sub>                  | HSO <sub>3</sub>              | NA       | HSO <sub>3</sub> + FeC oxaloaceta               | citrate |
| 1266 | FeCl <sub>3</sub>                  | HSO <sub>3</sub>              | NA       | HSO <sub>3</sub> + FeC oxaloaceta               | citrate |
| 1267 | Fe(ClO <sub>4</sub> ) <sub>2</sub> | HSO <sub>3</sub>              | NA       | HSO <sub>3</sub> + Fe( oxaloaceta               | citrate |
| 1268 | Fe(ClO <sub>4</sub> ) <sub>3</sub> | HSO <sub>3</sub>              | NA       | HSO <sub>3</sub> + Fe( oxaloaceta               | citrate |

|      |            |             |    |                                |
|------|------------|-------------|----|--------------------------------|
| 1269 | Fe Sulfide | HSO3        | NA | HSO3 + Fe : oxaloaceta citrate |
| 1270 | Fe Acetate | HSO3        | NA | HSO3 + Fe : oxaloaceta citrate |
| 1271 | Ferrocene  | HSO3        | NA | HSO3 + Fer oxaloaceta citrate  |
| 1272 | control    | HSO3        | NA | HSO3 + cor oxaloaceta citrate  |
| 1273 | FeCl2      | DMSO        | NA | DMSO + Fe oxaloaceta citrate   |
| 1274 | FeCl3      | DMSO        | NA | DMSO + Fe oxaloaceta citrate   |
| 1275 | Fe(ClO4)2  | DMSO        | NA | DMSO + Fe oxaloaceta citrate   |
| 1276 | Fe(ClO4)3  | DMSO        | NA | DMSO + Fe oxaloaceta citrate   |
| 1277 | Fe Sulfide | DMSO        | NA | DMSO + Fe oxaloaceta citrate   |
| 1278 | Fe Acetate | DMSO        | NA | DMSO + Fe oxaloaceta citrate   |
| 1279 | Ferrocene  | DMSO        | NA | DMSO + Fe oxaloaceta citrate   |
| 1280 | control    | DMSO        | NA | DMSO + co oxaloaceta citrate   |
| 1281 | FeCl2      | Cys         | NA | Cys + FeCl2 oxaloaceta citrate |
| 1282 | FeCl3      | Cys         | NA | Cys + FeCl3 oxaloaceta citrate |
| 1283 | Fe(ClO4)2  | Cys         | NA | Cys + Fe(Cl oxaloaceta citrate |
| 1284 | Fe(ClO4)3  | Cys         | NA | Cys + Fe(Cl oxaloaceta citrate |
| 1285 | Fe Sulfide | Cys         | NA | Cys + Fe Su oxaloaceta citrate |
| 1286 | Fe Acetate | Cys         | NA | Cys + Fe Ac oxaloaceta citrate |
| 1287 | Ferrocene  | Cys         | NA | Cys + Ferro oxaloaceta citrate |
| 1288 | control    | Cys         | NA | Cys + contr oxaloaceta citrate |
| 1289 | FeCl2      | Methionin   | NA | Methionin oxaloaceta citrate   |
| 1290 | FeCl3      | Methionin   | NA | Methionin oxaloaceta citrate   |
| 1291 | Fe(ClO4)2  | Methionin   | NA | Methionin oxaloaceta citrate   |
| 1292 | Fe(ClO4)3  | Methionin   | NA | Methionin oxaloaceta citrate   |
| 1293 | Fe Sulfide | Methionin   | NA | Methionin oxaloaceta citrate   |
| 1294 | Fe Acetate | Methionin   | NA | Methionin oxaloaceta citrate   |
| 1295 | Ferrocene  | Methionin   | NA | Methionin oxaloaceta citrate   |
| 1296 | control    | Methionin   | NA | Methionin oxaloaceta citrate   |
| 1297 | FeCl2      | Homocyste   | NA | Homocyste oxaloaceta citrate   |
| 1298 | FeCl3      | Homocyste   | NA | Homocyste oxaloaceta citrate   |
| 1299 | Fe(ClO4)2  | Homocyste   | NA | Homocyste oxaloaceta citrate   |
| 1300 | Fe(ClO4)3  | Homocyste   | NA | Homocyste oxaloaceta citrate   |
| 1301 | Fe Sulfide | Homocyste   | NA | Homocyste oxaloaceta citrate   |
| 1302 | Fe Acetate | Homocyste   | NA | Homocyste oxaloaceta citrate   |
| 1303 | Ferrocene  | Homocyste   | NA | Homocyste oxaloaceta citrate   |
| 1304 | control    | Homocyste   | NA | Homocyste oxaloaceta citrate   |
| 1305 | FeCl2      | DL-Ethionir | NA | DL-Ethionir oxaloaceta citrate |
| 1306 | FeCl3      | DL-Ethionir | NA | DL-Ethionir oxaloaceta citrate |
| 1307 | Fe(ClO4)2  | DL-Ethionir | NA | DL-Ethionir oxaloaceta citrate |
| 1308 | Fe(ClO4)3  | DL-Ethionir | NA | DL-Ethionir oxaloaceta citrate |
| 1309 | Fe Sulfide | DL-Ethionir | NA | DL-Ethionir oxaloaceta citrate |
| 1310 | Fe Acetate | DL-Ethionir | NA | DL-Ethionir oxaloaceta citrate |
| 1311 | Ferrocene  | DL-Ethionir | NA | DL-Ethionir oxaloaceta citrate |
| 1312 | control    | DL-Ethionir | NA | DL-Ethionir oxaloaceta citrate |
| 1313 | FeCl2      | 2-Mercapt   | NA | 2-Mercapt oxaloaceta citrate   |
| 1314 | FeCl3      | 2-Mercapt   | NA | 2-Mercapt oxaloaceta citrate   |
| 1315 | Fe(ClO4)2  | 2-Mercapt   | NA | 2-Mercapt oxaloaceta citrate   |

|      |            |              |          |                       |         |
|------|------------|--------------|----------|-----------------------|---------|
| 1316 | Fe(ClO4)3  | 2-Mercapt(NA |          | 2-Mercapt(oxaloaceta  | citrate |
| 1317 | Fe Sulfide | 2-Mercapt(NA |          | 2-Mercapt(oxaloaceta  | citrate |
| 1318 | Fe Acetate | 2-Mercapt(NA |          | 2-Mercapt(oxaloaceta  | citrate |
| 1319 | Ferrocene  | 2-Mercapt(NA |          | 2-Mercapt(oxaloaceta  | citrate |
| 1320 | control    | 2-Mercapt(NA |          | 2-Mercapt(oxaloaceta  | citrate |
| 1321 | FeCl2      | S2O8         | 0.629388 | S2O8 + FeC pyruvate   | citrate |
| 1322 | FeCl3      | S2O8         | -0.23944 | S2O8 + FeC pyruvate   | citrate |
| 1323 | Fe(ClO4)2  | S2O8         | -0.53361 | S2O8 + Fe(i pyruvate  | citrate |
| 1324 | Fe(ClO4)3  | S2O8         | -3.9884  | S2O8 + Fe(i pyruvate  | citrate |
| 1325 | Fe Sulfide | S2O8         | 3.27692  | S2O8 + Fe ; pyruvate  | citrate |
| 1326 | Fe Acetate | S2O8         | -0.17787 | S2O8 + Fe , pyruvate  | citrate |
| 1327 | Ferrocene  | S2O8         | 0.006841 | S2O8 + Fer pyruvate   | citrate |
| 1328 | control    | S2O8         | -0.08209 | S2O8 + con pyruvate   | citrate |
| 1329 | FeCl2      | control      | 0.164188 | control + Fi pyruvate | citrate |
| 1330 | FeCl3      | control      | -1.1972  | control + Fi pyruvate | citrate |
| 1331 | Fe(ClO4)2  | control      | 0.129982 | control + Fi pyruvate | citrate |
| 1332 | Fe(ClO4)3  | control      | -1.32719 | control + Fi pyruvate | citrate |
| 1333 | Fe Sulfide | control      | 0.123141 | control + Fi pyruvate | citrate |
| 1334 | Fe Acetate | control      | -0.51309 | control + Fi pyruvate | citrate |
| 1335 | Ferrocene  | control      | -0.25996 | control + Fi pyruvate | citrate |
| 1336 | control    | control      | 0.437835 | control + ci pyruvate | citrate |
| 1337 | FeCl2      | SO4          | 0.191553 | SO4 + FeCl: pyruvate  | citrate |
| 1338 | FeCl3      | SO4          | -1.32035 | SO4 + FeCl: pyruvate  | citrate |
| 1339 | Fe(ClO4)2  | SO4          | 0.287329 | SO4 + Fe(C pyruvate   | citrate |
| 1340 | Fe(ClO4)3  | SO4          | -1.48453 | SO4 + Fe(C pyruvate   | citrate |
| 1341 | Fe Sulfide | SO4          | -0.57466 | SO4 + Fe Si pyruvate  | citrate |
| 1342 | Fe Acetate | SO4          | -0.07525 | SO4 + Fe Ai pyruvate  | citrate |
| 1343 | Ferrocene  | SO4          | -0.86199 | SO4 + Ferr: pyruvate  | citrate |
| 1344 | control    | SO4          | 0.321535 | SO4 + cont pyruvate   | citrate |
| 1345 | FeCl2      | SO3          | -0.06841 | SO3 + FeCl: pyruvate  | citrate |
| 1346 | FeCl3      | SO3          | -0.77989 | SO3 + FeCl: pyruvate  | citrate |
| 1347 | Fe(ClO4)2  | SO3          | 0.088935 | SO3 + Fe(C pyruvate   | citrate |
| 1348 | Fe(ClO4)3  | SO3          | -0.35574 | SO3 + Fe(C pyruvate   | citrate |
| 1349 | Fe Sulfide | SO3          | 0.485723 | SO3 + Fe Si pyruvate  | citrate |
| 1350 | Fe Acetate | SO3          | -0.82094 | SO3 + Fe Ai pyruvate  | citrate |
| 1351 | Ferrocene  | SO3          | -0.38995 | SO3 + Ferr: pyruvate  | citrate |
| 1352 | control    | SO3          | 1.970257 | SO3 + cont pyruvate   | citrate |
| 1353 | FeCl2      | HSO3         | -0.66359 | HSO3 + FeC pyruvate   | citrate |
| 1354 | FeCl3      | HSO3         | -1.2793  | HSO3 + FeC pyruvate   | citrate |
| 1355 | Fe(ClO4)2  | HSO3         | -0.45836 | HSO3 + Fe( pyruvate   | citrate |
| 1356 | Fe(ClO4)3  | HSO3         | 0.93724  | HSO3 + Fe( pyruvate   | citrate |
| 1357 | Fe Sulfide | HSO3         | -0.00684 | HSO3 + Fe ; pyruvate  | citrate |
| 1358 | Fe Acetate | HSO3         | 0.321535 | HSO3 + Fe , pyruvate  | citrate |
| 1359 | Ferrocene  | HSO3         | 0.376264 | HSO3 + Fer pyruvate   | citrate |
| 1360 | control    | HSO3         | 0.362582 | HSO3 + cor pyruvate   | citrate |
| 1361 | FeCl2      | DMSO         | -0.20524 | DMSO + Fe pyruvate    | citrate |
| 1362 | FeCl3      | DMSO         | -0.02052 | DMSO + Fe pyruvate    | citrate |

|      |            |             |          |                      |         |
|------|------------|-------------|----------|----------------------|---------|
| 1363 | Fe(ClO4)2  | DMSO        | -0.61571 | DMSO + Fe pyruvate   | citrate |
| 1364 | Fe(ClO4)3  | DMSO        | 0.034206 | DMSO + Fe pyruvate   | citrate |
| 1365 | Fe Sulfide | DMSO        | 0.266806 | DMSO + Fe pyruvate   | citrate |
| 1366 | Fe Acetate | DMSO        | 0.745687 | DMSO + Fe pyruvate   | citrate |
| 1367 | Ferrocene  | DMSO        | 0.082094 | DMSO + Fe pyruvate   | citrate |
| 1368 | control    | DMSO        | 0.102618 | DMSO + co pyruvate   | citrate |
| 1369 | FeCl2      | Cys         | 1.019334 | Cys + FeCl2 pyruvate | citrate |
| 1370 | FeCl3      | Cys         | 1.491375 | Cys + FeCl3 pyruvate | citrate |
| 1371 | Fe(ClO4)2  | Cys         | 1.067222 | Cys + Fe(Cl pyruvate | citrate |
| 1372 | Fe(ClO4)3  | Cys         | 2.934862 | Cys + Fe(Cl pyruvate | citrate |
| 1373 | Fe Sulfide | Cys         | 3.988402 | Cys + Fe Su pyruvate | citrate |
| 1374 | Fe Acetate | Cys         | 3.09905  | Cys + Fe Ac pyruvate | citrate |
| 1375 | Ferrocene  | Cys         | 1.498216 | Cys + Ferro pyruvate | citrate |
| 1376 | control    | Cys         | 1.197205 | Cys + contr pyruvate | citrate |
| 1377 | FeCl2      | Methionine  | 0.29417  | Methionine pyruvate  | citrate |
| 1378 | FeCl3      | Methionine  | -0.60202 | Methionine pyruvate  | citrate |
| 1379 | Fe(ClO4)2  | Methionine  | -0.86199 | Methionine pyruvate  | citrate |
| 1380 | Fe(ClO4)3  | Methionine  | -0.2326  | Methionine pyruvate  | citrate |
| 1381 | Fe Sulfide | Methionine  | -0.32153 | Methionine pyruvate  | citrate |
| 1382 | Fe Acetate | Methionine  | 0.773052 | Methionine pyruvate  | citrate |
| 1383 | Ferrocene  | Methionine  | -0.13682 | Methionine pyruvate  | citrate |
| 1384 | control    | Methionine  | 0.533611 | Methionine pyruvate  | citrate |
| 1385 | FeCl2      | Homocyste   | 1.162999 | Homocyste pyruvate   | citrate |
| 1386 | FeCl3      | Homocyste   | -0.64307 | Homocyste pyruvate   | citrate |
| 1387 | Fe(ClO4)2  | Homocyste   | -0.08894 | Homocyste pyruvate   | citrate |
| 1388 | Fe(ClO4)3  | Homocyste   | -1.07406 | Homocyste pyruvate   | citrate |
| 1389 | Fe Sulfide | Homocyste   | -0.06841 | Homocyste pyruvate   | citrate |
| 1390 | Fe Acetate | Homocyste   | -0.15735 | Homocyste pyruvate   | citrate |
| 1391 | Ferrocene  | Homocyste   | -0.21208 | Homocyste pyruvate   | citrate |
| 1392 | control    | Homocyste   | 0.307853 | Homocyste pyruvate   | citrate |
| 1393 | FeCl2      | DL-Ethionir | 0.164188 | DL-Ethionir pyruvate | citrate |
| 1394 | FeCl3      | DL-Ethionir | -0.50625 | DL-Ethionir pyruvate | citrate |
| 1395 | Fe(ClO4)2  | DL-Ethionir | -0.16419 | DL-Ethionir pyruvate | citrate |
| 1396 | Fe(ClO4)3  | DL-Ethionir | 0.608864 | DL-Ethionir pyruvate | citrate |
| 1397 | Fe Sulfide | DL-Ethionir | -0.51993 | DL-Ethionir pyruvate | citrate |
| 1398 | Fe Acetate | DL-Ethionir | 0.773052 | DL-Ethionir pyruvate | citrate |
| 1399 | Ferrocene  | DL-Ethionir | 0.581499 | DL-Ethionir pyruvate | citrate |
| 1400 | control    | DL-Ethionir | 0.417311 | DL-Ethionir pyruvate | citrate |
| 1401 | FeCl2      | 2-Mercapt   | 0.198394 | 2-Mercapt pyruvate   | citrate |
| 1402 | FeCl3      | 2-Mercapt   | -0.48572 | 2-Mercapt pyruvate   | citrate |
| 1403 | Fe(ClO4)2  | 2-Mercapt   | -0.59518 | 2-Mercapt pyruvate   | citrate |
| 1404 | Fe(ClO4)3  | 2-Mercapt   | 0.663593 | 2-Mercapt pyruvate   | citrate |
| 1405 | Fe Sulfide | 2-Mercapt   | 0.239441 | 2-Mercapt pyruvate   | citrate |
| 1406 | Fe Acetate | 2-Mercapt   | 0.342058 | 2-Mercapt pyruvate   | citrate |
| 1407 | Ferrocene  | 2-Mercapt   | 0.013682 | 2-Mercapt pyruvate   | citrate |
| 1408 | control    | 2-Mercapt   | 0.451517 | 2-Mercapt pyruvate   | citrate |
| 1409 | FeCl2      | S2O8        | -0.76659 | S2O8 + FeC succinate | citrate |

|      |            |         |          |                        |         |
|------|------------|---------|----------|------------------------|---------|
| 1410 | FeCl3      | S2O8    | -0.15045 | S2O8 + FeC succinate   | citrate |
| 1411 | Fe(ClO4)2  | S2O8    | 0.487177 | S2O8 + Fe(i succinate  | citrate |
| 1412 | Fe(ClO4)3  | S2O8    | 3.811447 | S2O8 + Fe(i succinate  | citrate |
| 1413 | Fe Sulfide | S2O8    | 18.57722 | S2O8 + Fe ! succinate  | citrate |
| 1414 | Fe Acetate | S2O8    | 0.752259 | S2O8 + Fe , succinate  | citrate |
| 1415 | Ferrocene  | S2O8    | 16.43508 | S2O8 + Fer succinate   | citrate |
| 1416 | control    | S2O8    | 10.27371 | S2O8 + con succinate   | citrate |
| 1417 | FeCl2      | control | 0.34389  | control + Fi succinate | citrate |
| 1418 | FeCl3      | control | 0.186274 | control + Fi succinate | citrate |
| 1419 | Fe(ClO4)2  | control | -1.09615 | control + Fi succinate | citrate |
| 1420 | Fe(ClO4)3  | control | 0.508671 | control + Fi succinate | citrate |
| 1421 | Fe Sulfide | control | -0.90988 | control + Fi succinate | citrate |
| 1422 | Fe Acetate | control | 0.386876 | control + Fi succinate | citrate |
| 1423 | Ferrocene  | control | -1.20361 | control + Fi succinate | citrate |
| 1424 | control    | control | 1.303916 | control + ci succinate | citrate |
| 1425 | FeCl2      | SO4     | 0.673451 | SO4 + FeCl: succinate  | citrate |
| 1426 | FeCl3      | SO4     | -0.80241 | SO4 + FeCl: succinate  | citrate |
| 1427 | Fe(ClO4)2  | SO4     | 0.193438 | SO4 + Fe(C succinate   | citrate |
| 1428 | Fe(ClO4)3  | SO4     | -1.70512 | SO4 + Fe(C succinate   | citrate |
| 1429 | Fe Sulfide | SO4     | -0.23642 | SO4 + Fe Si succinate  | citrate |
| 1430 | Fe Acetate | SO4     | -0.44419 | SO4 + Fe Ai succinate  | citrate |
| 1431 | Ferrocene  | SO4     | -0.53016 | SO4 + Ferr: succinate  | citrate |
| 1432 | control    | SO4     | 0.465684 | SO4 + cont succinate   | citrate |
| 1433 | FeCl2      | SO3     | 0.666287 | SO3 + FeCl: succinate  | citrate |
| 1434 | FeCl3      | SO3     | 1.117642 | SO3 + FeCl: succinate  | citrate |
| 1435 | Fe(ClO4)2  | SO3     | -0.1003  | SO3 + Fe(C succinate   | citrate |
| 1436 | Fe(ClO4)3  | SO3     | -0.05731 | SO3 + Fe(C succinate   | citrate |
| 1437 | Fe Sulfide | SO3     | -0.1003  | SO3 + Fe Si succinate  | citrate |
| 1438 | Fe Acetate | SO3     | 0.22926  | SO3 + Fe Ai succinate  | citrate |
| 1439 | Ferrocene  | SO3     | 0.057315 | SO3 + Ferr: succinate  | citrate |
| 1440 | control    | SO3     | -0.19344 | SO3 + cont succinate   | citrate |
| 1441 | FeCl2      | HSO3    | 0.924204 | HSO3 + FeC succinate   | citrate |
| 1442 | FeCl3      | HSO3    | 0.415534 | HSO3 + FeC succinate   | citrate |
| 1443 | Fe(ClO4)2  | HSO3    | 0.157616 | HSO3 + Fe( succinate   | citrate |
| 1444 | Fe(ClO4)3  | HSO3    | 0.437027 | HSO3 + Fe( succinate   | citrate |
| 1445 | Fe Sulfide | HSO3    | 2.185134 | HSO3 + Fe . succinate  | citrate |
| 1446 | Fe Acetate | HSO3    | -0.37255 | HSO3 + Fe . succinate  | citrate |
| 1447 | Ferrocene  | HSO3    | 1.131971 | HSO3 + Fer succinate   | citrate |
| 1448 | control    | HSO3    | 3.231133 | HSO3 + cor succinate   | citrate |
| 1449 | FeCl2      | DMSO    | 0.279411 | DMSO + Fe succinate    | citrate |
| 1450 | FeCl3      | DMSO    | -0.15762 | DMSO + Fe succinate    | citrate |
| 1451 | Fe(ClO4)2  | DMSO    | -0.18627 | DMSO + Fe succinate    | citrate |
| 1452 | Fe(ClO4)3  | DMSO    | 0.064479 | DMSO + Fe succinate    | citrate |
| 1453 | Fe Sulfide | DMSO    | -0.60897 | DMSO + Fe succinate    | citrate |
| 1454 | Fe Acetate | DMSO    | -1.03883 | DMSO + Fe succinate    | citrate |
| 1455 | Ferrocene  | DMSO    | 0.179109 | DMSO + Fe succinate    | citrate |
| 1456 | control    | DMSO    | 0.315232 | DMSO + co succinate    | citrate |

|      |                                    |                    |          |                                                      |         |
|------|------------------------------------|--------------------|----------|------------------------------------------------------|---------|
| 1457 | FeCl <sub>2</sub>                  | Cys                | -0.13612 | Cys + FeCl <sub>2</sub> succinate                    | citrate |
| 1458 | FeCl <sub>3</sub>                  | Cys                | 0.80241  | Cys + FeCl <sub>3</sub> succinate                    | citrate |
| 1459 | Fe(ClO <sub>4</sub> ) <sub>2</sub> | Cys                | -0.07164 | Cys + Fe(ClO <sub>4</sub> ) <sub>2</sub> succinate   | citrate |
| 1460 | Fe(ClO <sub>4</sub> ) <sub>3</sub> | Cys                | -0.20777 | Cys + Fe(ClO <sub>4</sub> ) <sub>3</sub> succinate   | citrate |
| 1461 | Fe Sulfide                         | Cys                | -0.70927 | Cys + Fe Sulfide succinate                           | citrate |
| 1462 | Fe Acetate                         | Cys                | -0.3009  | Cys + Fe Acetate succinate                           | citrate |
| 1463 | Ferrocene                          | Cys                | -0.18627 | Cys + Ferrocene succinate                            | citrate |
| 1464 | control                            | Cys                | 0.358219 | Cys + control succinate                              | citrate |
| 1465 | FeCl <sub>2</sub>                  | Methionine         | 0.358219 | Methionine succinate                                 | citrate |
| 1466 | FeCl <sub>3</sub>                  | Methionine         | -0.07164 | Methionine succinate                                 | citrate |
| 1467 | Fe(ClO <sub>4</sub> ) <sub>2</sub> | Methionine         | -0.55166 | Methionine succinate                                 | citrate |
| 1468 | Fe(ClO <sub>4</sub> ) <sub>3</sub> | Methionine         | -0.27941 | Methionine succinate                                 | citrate |
| 1469 | Fe Sulfide                         | Methionine         | -0.48001 | Methionine succinate                                 | citrate |
| 1470 | Fe Acetate                         | Methionine         | -0.43703 | Methionine succinate                                 | citrate |
| 1471 | Ferrocene                          | Methionine         | 0.422698 | Methionine succinate                                 | citrate |
| 1472 | control                            | Methionine         | 0.616136 | Methionine succinate                                 | citrate |
| 1473 | FeCl <sub>2</sub>                  | Homocysteine       | -0.1003  | Homocysteine succinate                               | citrate |
| 1474 | FeCl <sub>3</sub>                  | Homocysteine       | -0.523   | Homocysteine succinate                               | citrate |
| 1475 | Fe(ClO <sub>4</sub> ) <sub>2</sub> | Homocysteine       | -0.78808 | Homocysteine succinate                               | citrate |
| 1476 | Fe(ClO <sub>4</sub> ) <sub>3</sub> | Homocysteine       | -0.36538 | Homocysteine succinate                               | citrate |
| 1477 | Fe Sulfide                         | Homocysteine       | -1.23944 | Homocysteine succinate                               | citrate |
| 1478 | Fe Acetate                         | Homocysteine       | 0.171945 | Homocysteine succinate                               | citrate |
| 1479 | Ferrocene                          | Homocysteine       | 0.293739 | Homocysteine succinate                               | citrate |
| 1480 | control                            | Homocysteine       | 0.608972 | Homocysteine succinate                               | citrate |
| 1481 | FeCl <sub>2</sub>                  | DL-Ethionine       | 0.723602 | DL-Ethionine succinate                               | citrate |
| 1482 | FeCl <sub>3</sub>                  | DL-Ethionine       | -0.87405 | DL-Ethionine succinate                               | citrate |
| 1483 | Fe(ClO <sub>4</sub> ) <sub>2</sub> | DL-Ethionine       | -0.65196 | DL-Ethionine succinate                               | citrate |
| 1484 | Fe(ClO <sub>4</sub> ) <sub>3</sub> | DL-Ethionine       | 0.222096 | DL-Ethionine succinate                               | citrate |
| 1485 | Fe Sulfide                         | DL-Ethionine       | 0.351054 | DL-Ethionine succinate                               | citrate |
| 1486 | Fe Acetate                         | DL-Ethionine       | -0.57315 | DL-Ethionine succinate                               | citrate |
| 1487 | Ferrocene                          | DL-Ethionine       | 0.551657 | DL-Ethionine succinate                               | citrate |
| 1488 | control                            | DL-Ethionine       | 0.501506 | DL-Ethionine succinate                               | citrate |
| 1489 | FeCl <sub>2</sub>                  | 2-Mercaptopyridine | -0.08597 | 2-Mercaptopyridine succinate                         | citrate |
| 1490 | FeCl <sub>3</sub>                  | 2-Mercaptopyridine | -0.64479 | 2-Mercaptopyridine succinate                         | citrate |
| 1491 | Fe(ClO <sub>4</sub> ) <sub>2</sub> | 2-Mercaptopyridine | -0.28657 | 2-Mercaptopyridine succinate                         | citrate |
| 1492 | Fe(ClO <sub>4</sub> ) <sub>3</sub> | 2-Mercaptopyridine | -0.53016 | 2-Mercaptopyridine succinate                         | citrate |
| 1493 | Fe Sulfide                         | 2-Mercaptopyridine | -0.65196 | 2-Mercaptopyridine succinate                         | citrate |
| 1494 | Fe Acetate                         | 2-Mercaptopyridine | -0.22926 | 2-Mercaptopyridine succinate                         | citrate |
| 1495 | Ferrocene                          | 2-Mercaptopyridine | 0.422698 | 2-Mercaptopyridine succinate                         | citrate |
| 1496 | control                            | 2-Mercaptopyridine | 0.150452 | 2-Mercaptopyridine succinate                         | citrate |
| 1497 | FeCl <sub>2</sub>                  | S2O8               | NA       | S2O8 + FeCl <sub>2</sub> succsemial                  | citrate |
| 1498 | FeCl <sub>3</sub>                  | S2O8               | NA       | S2O8 + FeCl <sub>3</sub> succsemial                  | citrate |
| 1499 | Fe(ClO <sub>4</sub> ) <sub>2</sub> | S2O8               | NA       | S2O8 + Fe(ClO <sub>4</sub> ) <sub>2</sub> succsemial | citrate |
| 1500 | Fe(ClO <sub>4</sub> ) <sub>3</sub> | S2O8               | NA       | S2O8 + Fe(ClO <sub>4</sub> ) <sub>3</sub> succsemial | citrate |
| 1501 | Fe Sulfide                         | S2O8               | NA       | S2O8 + Fe Sulfide succsemial                         | citrate |
| 1502 | Fe Acetate                         | S2O8               | NA       | S2O8 + Fe Acetate succsemial                         | citrate |
| 1503 | Ferrocene                          | S2O8               | NA       | S2O8 + Ferrocene succsemial                          | citrate |



|      |                       |         |    |                                             |
|------|-----------------------|---------|----|---------------------------------------------|
| 1504 | control               | S2O8    | NA | S2O8 + con succsemial citrate               |
| 1505 | FeCl2                 | control | NA | control + F <sub>i</sub> succsemial citrate |
| 1506 | FeCl3                 | control | NA | control + F <sub>i</sub> succsemial citrate |
| 1507 | Fe(ClO4) <sub>2</sub> | control | NA | control + F <sub>i</sub> succsemial citrate |
| 1508 | Fe(ClO4) <sub>3</sub> | control | NA | control + F <sub>i</sub> succsemial citrate |
| 1509 | Fe Sulfide            | control | NA | control + F <sub>i</sub> succsemial citrate |
| 1510 | Fe Acetate            | control | NA | control + F <sub>i</sub> succsemial citrate |
| 1511 | Ferrocene             | control | NA | control + F <sub>i</sub> succsemial citrate |
| 1512 | control               | control | NA | control + c <sub>i</sub> succsemial citrate |
| 1513 | FeCl2                 | SO4     | NA | SO4 + FeCl <sub>2</sub> succsemial citrate  |
| 1514 | FeCl3                 | SO4     | NA | SO4 + FeCl <sub>3</sub> succsemial citrate  |
| 1515 | Fe(ClO4) <sub>2</sub> | SO4     | NA | SO4 + Fe(C succsemial citrate               |
| 1516 | Fe(ClO4) <sub>3</sub> | SO4     | NA | SO4 + Fe(C succsemial citrate               |
| 1517 | Fe Sulfide            | SO4     | NA | SO4 + Fe S <sub>i</sub> succsemial citrate  |
| 1518 | Fe Acetate            | SO4     | NA | SO4 + Fe A <sub>i</sub> succsemial citrate  |
| 1519 | Ferrocene             | SO4     | NA | SO4 + Ferr <sub>i</sub> succsemial citrate  |
| 1520 | control               | SO4     | NA | SO4 + cont succsemial citrate               |
| 1521 | FeCl2                 | SO3     | NA | SO3 + FeCl <sub>2</sub> succsemial citrate  |
| 1522 | FeCl3                 | SO3     | NA | SO3 + FeCl <sub>3</sub> succsemial citrate  |
| 1523 | Fe(ClO4) <sub>2</sub> | SO3     | NA | SO3 + Fe(C succsemial citrate               |
| 1524 | Fe(ClO4) <sub>3</sub> | SO3     | NA | SO3 + Fe(C succsemial citrate               |
| 1525 | Fe Sulfide            | SO3     | NA | SO3 + Fe S <sub>i</sub> succsemial citrate  |
| 1526 | Fe Acetate            | SO3     | NA | SO3 + Fe A <sub>i</sub> succsemial citrate  |
| 1527 | Ferrocene             | SO3     | NA | SO3 + Ferr <sub>i</sub> succsemial citrate  |
| 1528 | control               | SO3     | NA | SO3 + cont succsemial citrate               |
| 1529 | FeCl2                 | HSO3    | NA | HSO3 + Fe(C succsemial citrate              |
| 1530 | FeCl3                 | HSO3    | NA | HSO3 + Fe(C succsemial citrate              |
| 1531 | Fe(ClO4) <sub>2</sub> | HSO3    | NA | HSO3 + Fe( succsemial citrate               |
| 1532 | Fe(ClO4) <sub>3</sub> | HSO3    | NA | HSO3 + Fe( succsemial citrate               |
| 1533 | Fe Sulfide            | HSO3    | NA | HSO3 + Fe <sub>i</sub> succsemial citrate   |
| 1534 | Fe Acetate            | HSO3    | NA | HSO3 + Fe <sub>i</sub> succsemial citrate   |
| 1535 | Ferrocene             | HSO3    | NA | HSO3 + Fer succsemial citrate               |
| 1536 | control               | HSO3    | NA | HSO3 + cor succsemial citrate               |
| 1537 | FeCl2                 | DMSO    | NA | DMSO + Fe succsemial citrate                |
| 1538 | FeCl3                 | DMSO    | NA | DMSO + Fe succsemial citrate                |
| 1539 | Fe(ClO4) <sub>2</sub> | DMSO    | NA | DMSO + Fe succsemial citrate                |
| 1540 | Fe(ClO4) <sub>3</sub> | DMSO    | NA | DMSO + Fe succsemial citrate                |
| 1541 | Fe Sulfide            | DMSO    | NA | DMSO + Fe succsemial citrate                |
| 1542 | Fe Acetate            | DMSO    | NA | DMSO + Fe succsemial citrate                |
| 1543 | Ferrocene             | DMSO    | NA | DMSO + Fe succsemial citrate                |
| 1544 | control               | DMSO    | NA | DMSO + co succsemial citrate                |
| 1545 | FeCl2                 | Cys     | NA | Cys + FeCl <sub>2</sub> succsemial citrate  |
| 1546 | FeCl3                 | Cys     | NA | Cys + FeCl <sub>3</sub> succsemial citrate  |
| 1547 | Fe(ClO4) <sub>2</sub> | Cys     | NA | Cys + Fe(Cl <sub>2</sub> succsemial citrate |
| 1548 | Fe(ClO4) <sub>3</sub> | Cys     | NA | Cys + Fe(Cl <sub>3</sub> succsemial citrate |
| 1549 | Fe Sulfide            | Cys     | NA | Cys + Fe S <sub>i</sub> succsemial citrate  |
| 1550 | Fe Acetate            | Cys     | NA | Cys + Fe Ac succsemial citrate              |

|      |                                    |                 |    |                                             |
|------|------------------------------------|-----------------|----|---------------------------------------------|
| 1551 | Ferrocene                          | Cys             | NA | Cys + Ferro succsemial citrate              |
| 1552 | control                            | Cys             | NA | Cys + contr succsemial citrate              |
| 1553 | FeCl <sub>2</sub>                  | Methionin       | NA | Methionin succsemial citrate                |
| 1554 | FeCl <sub>3</sub>                  | Methionin       | NA | Methionin succsemial citrate                |
| 1555 | Fe(ClO <sub>4</sub> ) <sub>2</sub> | Methionin       | NA | Methionin succsemial citrate                |
| 1556 | Fe(ClO <sub>4</sub> ) <sub>3</sub> | Methionin       | NA | Methionin succsemial citrate                |
| 1557 | Fe Sulfide                         | Methionin       | NA | Methionin succsemial citrate                |
| 1558 | Fe Acetate                         | Methionin       | NA | Methionin succsemial citrate                |
| 1559 | Ferrocene                          | Methionin       | NA | Methionin succsemial citrate                |
| 1560 | control                            | Methionin       | NA | Methionin succsemial citrate                |
| 1561 | FeCl <sub>2</sub>                  | Homocyste       | NA | Homocyste succsemial citrate                |
| 1562 | FeCl <sub>3</sub>                  | Homocyste       | NA | Homocyste succsemial citrate                |
| 1563 | Fe(ClO <sub>4</sub> ) <sub>2</sub> | Homocyste       | NA | Homocyste succsemial citrate                |
| 1564 | Fe(ClO <sub>4</sub> ) <sub>3</sub> | Homocyste       | NA | Homocyste succsemial citrate                |
| 1565 | Fe Sulfide                         | Homocyste       | NA | Homocyste succsemial citrate                |
| 1566 | Fe Acetate                         | Homocyste       | NA | Homocyste succsemial citrate                |
| 1567 | Ferrocene                          | Homocyste       | NA | Homocyste succsemial citrate                |
| 1568 | control                            | Homocyste       | NA | Homocyste succsemial citrate                |
| 1569 | FeCl <sub>2</sub>                  | DL-Ethionir     | NA | DL-Ethionir succsemial citrate              |
| 1570 | FeCl <sub>3</sub>                  | DL-Ethionir     | NA | DL-Ethionir succsemial citrate              |
| 1571 | Fe(ClO <sub>4</sub> ) <sub>2</sub> | DL-Ethionir     | NA | DL-Ethionir succsemial citrate              |
| 1572 | Fe(ClO <sub>4</sub> ) <sub>3</sub> | DL-Ethionir     | NA | DL-Ethionir succsemial citrate              |
| 1573 | Fe Sulfide                         | DL-Ethionir     | NA | DL-Ethionir succsemial citrate              |
| 1574 | Fe Acetate                         | DL-Ethionir     | NA | DL-Ethionir succsemial citrate              |
| 1575 | Ferrocene                          | DL-Ethionir     | NA | DL-Ethionir succsemial citrate              |
| 1576 | control                            | DL-Ethionir     | NA | DL-Ethionir succsemial citrate              |
| 1577 | FeCl <sub>2</sub>                  | 2-Mercapt       | NA | 2-Mercapt succsemial citrate                |
| 1578 | FeCl <sub>3</sub>                  | 2-Mercapt       | NA | 2-Mercapt succsemial citrate                |
| 1579 | Fe(ClO <sub>4</sub> ) <sub>2</sub> | 2-Mercapt       | NA | 2-Mercapt succsemial citrate                |
| 1580 | Fe(ClO <sub>4</sub> ) <sub>3</sub> | 2-Mercapt       | NA | 2-Mercapt succsemial citrate                |
| 1581 | Fe Sulfide                         | 2-Mercapt       | NA | 2-Mercapt succsemial citrate                |
| 1582 | Fe Acetate                         | 2-Mercapt       | NA | 2-Mercapt succsemial citrate                |
| 1583 | Ferrocene                          | 2-Mercapt       | NA | 2-Mercapt succsemial citrate                |
| 1584 | control                            | 2-Mercapt       | NA | 2-Mercapt succsemial citrate                |
| 1585 | FeCl <sub>2</sub>                  | S2O8            | NA | S2O8 + FeC alphaketog fumarate              |
| 1586 | FeCl <sub>3</sub>                  | S2O8            | NA | S2O8 + FeC alphaketog fumarate              |
| 1587 | Fe(ClO <sub>4</sub> ) <sub>2</sub> | S2O8            | NA | S2O8 + Fe(α alphaketog fumarate             |
| 1588 | Fe(ClO <sub>4</sub> ) <sub>3</sub> | S2O8            | NA | S2O8 + Fe(α alphaketog fumarate             |
| 1589 | Fe Sulfide                         | S2O8            | NA | S2O8 + Fe β alphaketog fumarate             |
| 1590 | Fe Acetate                         | S2O8            | NA | S2O8 + Fe γ alphaketog fumarate             |
| 1591 | Ferrocene                          | S2O8            | NA | S2O8 + Fer alphaketog fumarate              |
| 1592 | control                            | S2O8            | NA | S2O8 + con alphaketog fumarate              |
| 1593 | FeCl <sub>2</sub>                  | SO <sub>4</sub> | NA | SO <sub>4</sub> + FeCl: alphaketog fumarate |
| 1594 | FeCl <sub>3</sub>                  | SO <sub>4</sub> | NA | SO <sub>4</sub> + FeCl: alphaketog fumarate |
| 1595 | Fe(ClO <sub>4</sub> ) <sub>2</sub> | SO <sub>4</sub> | NA | SO <sub>4</sub> + Fe(C alphaketog fumarate  |
| 1596 | Fe(ClO <sub>4</sub> ) <sub>3</sub> | SO <sub>4</sub> | NA | SO <sub>4</sub> + Fe(C alphaketog fumarate  |
| 1597 | Fe Sulfide                         | SO <sub>4</sub> | NA | SO <sub>4</sub> + Fe Sα alphaketog fumarate |

|      |            |           |    |             |                     |
|------|------------|-----------|----|-------------|---------------------|
| 1598 | Fe Acetate | SO4       | NA | SO4 + Fe A  | alphaketog fumarate |
| 1599 | Ferrocene  | SO4       | NA | SO4 + Ferr  | alphaketog fumarate |
| 1600 | control    | SO4       | NA | SO4 + cont  | alphaketog fumarate |
| 1601 | FeCl2      | SO3       | NA | SO3 + FeCl  | alphaketog fumarate |
| 1602 | FeCl3      | SO3       | NA | SO3 + FeCl  | alphaketog fumarate |
| 1603 | Fe(ClO4)2  | SO3       | NA | SO3 + Fe(C  | alphaketog fumarate |
| 1604 | Fe(ClO4)3  | SO3       | NA | SO3 + Fe(C  | alphaketog fumarate |
| 1605 | Fe Sulfide | SO3       | NA | SO3 + Fe S  | alphaketog fumarate |
| 1606 | Fe Acetate | SO3       | NA | SO3 + Fe A  | alphaketog fumarate |
| 1607 | Ferrocene  | SO3       | NA | SO3 + Ferr  | alphaketog fumarate |
| 1608 | control    | SO3       | NA | SO3 + cont  | alphaketog fumarate |
| 1609 | FeCl2      | HSO3      | NA | HSO3 + FeC  | alphaketog fumarate |
| 1610 | FeCl3      | HSO3      | NA | HSO3 + FeC  | alphaketog fumarate |
| 1611 | Fe(ClO4)2  | HSO3      | NA | HSO3 + Fe(  | alphaketog fumarate |
| 1612 | Fe(ClO4)3  | HSO3      | NA | HSO3 + Fe(  | alphaketog fumarate |
| 1613 | Fe Sulfide | HSO3      | NA | HSO3 + Fe   | alphaketog fumarate |
| 1614 | Fe Acetate | HSO3      | NA | HSO3 + Fe   | alphaketog fumarate |
| 1615 | Ferrocene  | HSO3      | NA | HSO3 + Fer  | alphaketog fumarate |
| 1616 | control    | HSO3      | NA | HSO3 + cor  | alphaketog fumarate |
| 1617 | FeCl2      | DMSO      | NA | DMSO + Fe   | alphaketog fumarate |
| 1618 | FeCl3      | DMSO      | NA | DMSO + Fe   | alphaketog fumarate |
| 1619 | Fe(ClO4)2  | DMSO      | NA | DMSO + Fe   | alphaketog fumarate |
| 1620 | Fe(ClO4)3  | DMSO      | NA | DMSO + Fe   | alphaketog fumarate |
| 1621 | Fe Sulfide | DMSO      | NA | DMSO + Fe   | alphaketog fumarate |
| 1622 | Fe Acetate | DMSO      | NA | DMSO + Fe   | alphaketog fumarate |
| 1623 | Ferrocene  | DMSO      | NA | DMSO + Fe   | alphaketog fumarate |
| 1624 | control    | DMSO      | NA | DMSO + co   | alphaketog fumarate |
| 1625 | FeCl2      | Cys       | NA | Cys + FeCl2 | alphaketog fumarate |
| 1626 | FeCl3      | Cys       | NA | Cys + FeCl3 | alphaketog fumarate |
| 1627 | Fe(ClO4)2  | Cys       | NA | Cys + Fe(Cl | alphaketog fumarate |
| 1628 | Fe(ClO4)3  | Cys       | NA | Cys + Fe(Cl | alphaketog fumarate |
| 1629 | Fe Sulfide | Cys       | NA | Cys + Fe Su | alphaketog fumarate |
| 1630 | Fe Acetate | Cys       | NA | Cys + Fe Ac | alphaketog fumarate |
| 1631 | Ferrocene  | Cys       | NA | Cys + Ferro | alphaketog fumarate |
| 1632 | control    | Cys       | NA | Cys + contr | alphaketog fumarate |
| 1633 | FeCl2      | Methionin | NA | Methionin   | alphaketog fumarate |
| 1634 | FeCl3      | Methionin | NA | Methionin   | alphaketog fumarate |
| 1635 | Fe(ClO4)2  | Methionin | NA | Methionin   | alphaketog fumarate |
| 1636 | Fe(ClO4)3  | Methionin | NA | Methionin   | alphaketog fumarate |
| 1637 | Fe Sulfide | Methionin | NA | Methionin   | alphaketog fumarate |
| 1638 | Fe Acetate | Methionin | NA | Methionin   | alphaketog fumarate |
| 1639 | Ferrocene  | Methionin | NA | Methionin   | alphaketog fumarate |
| 1640 | control    | Methionin | NA | Methionin   | alphaketog fumarate |
| 1641 | FeCl2      | Homocyste | NA | Homocyste   | alphaketog fumarate |
| 1642 | FeCl3      | Homocyste | NA | Homocyste   | alphaketog fumarate |
| 1643 | Fe(ClO4)2  | Homocyste | NA | Homocyste   | alphaketog fumarate |
| 1644 | Fe(ClO4)3  | Homocyste | NA | Homocyste   | alphaketog fumarate |

|      |            |             |    |                                   |
|------|------------|-------------|----|-----------------------------------|
| 1645 | Fe Sulfide | Homocyste   | NA | Homocyste alphaketog fumarate     |
| 1646 | Fe Acetate | Homocyste   | NA | Homocyste alphaketog fumarate     |
| 1647 | Ferrocene  | Homocyste   | NA | Homocyste alphaketog fumarate     |
| 1648 | control    | Homocyste   | NA | Homocyste alphaketog fumarate     |
| 1649 | FeCl2      | DL-Ethionir | NA | DL-Ethionir alphaketog fumarate   |
| 1650 | FeCl3      | DL-Ethionir | NA | DL-Ethionir alphaketog fumarate   |
| 1651 | Fe(ClO4)2  | DL-Ethionir | NA | DL-Ethionir alphaketog fumarate   |
| 1652 | Fe(ClO4)3  | DL-Ethionir | NA | DL-Ethionir alphaketog fumarate   |
| 1653 | Fe Sulfide | DL-Ethionir | NA | DL-Ethionir alphaketog fumarate   |
| 1654 | Fe Acetate | DL-Ethionir | NA | DL-Ethionir alphaketog fumarate   |
| 1655 | Ferrocene  | DL-Ethionir | NA | DL-Ethionir alphaketog fumarate   |
| 1656 | control    | DL-Ethionir | NA | DL-Ethionir alphaketog fumarate   |
| 1657 | FeCl2      | 2-Mercapt   | NA | 2-Mercapt alphaketog fumarate     |
| 1658 | FeCl3      | 2-Mercapt   | NA | 2-Mercapt alphaketog fumarate     |
| 1659 | Fe(ClO4)2  | 2-Mercapt   | NA | 2-Mercapt alphaketog fumarate     |
| 1660 | Fe(ClO4)3  | 2-Mercapt   | NA | 2-Mercapt alphaketog fumarate     |
| 1661 | Fe Sulfide | 2-Mercapt   | NA | 2-Mercapt alphaketog fumarate     |
| 1662 | Fe Acetate | 2-Mercapt   | NA | 2-Mercapt alphaketog fumarate     |
| 1663 | Ferrocene  | 2-Mercapt   | NA | 2-Mercapt alphaketog fumarate     |
| 1664 | control    | 2-Mercapt   | NA | 2-Mercapt alphaketog fumarate     |
| 1665 | FeCl2      | control     | NA | control + Fe alphaketog fumarate  |
| 1666 | FeCl3      | control     | NA | control + Fe alphaketog fumarate  |
| 1667 | Fe(ClO4)2  | control     | NA | control + Fe alphaketog fumarate  |
| 1668 | Fe(ClO4)3  | control     | NA | control + Fe alphaketog fumarate  |
| 1669 | Fe Sulfide | control     | NA | control + Fe alphaketog fumarate  |
| 1670 | Fe Acetate | control     | NA | control + Fe alphaketog fumarate  |
| 1671 | Ferrocene  | control     | NA | control + Fe alphaketog fumarate  |
| 1672 | control    | control     | NA | control + Fe alphaketog fumarate  |
| 1673 | FeCl2      | S2O8        | NA | S2O8 + Fe(C cisaconitat fumarate  |
| 1674 | FeCl3      | S2O8        | NA | S2O8 + Fe(C cisaconitat fumarate  |
| 1675 | Fe(ClO4)2  | S2O8        | NA | S2O8 + Fe(C cisaconitat fumarate  |
| 1676 | Fe(ClO4)3  | S2O8        | NA | S2O8 + Fe(C cisaconitat fumarate  |
| 1677 | Fe Sulfide | S2O8        | NA | S2O8 + Fe(C cisaconitat fumarate  |
| 1678 | Fe Acetate | S2O8        | NA | S2O8 + Fe(C cisaconitat fumarate  |
| 1679 | Ferrocene  | S2O8        | NA | S2O8 + Fe(C cisaconitat fumarate  |
| 1680 | control    | S2O8        | NA | S2O8 + con cisaconitat fumarate   |
| 1681 | FeCl2      | SO4         | NA | SO4 + FeCl(C cisaconitat fumarate |
| 1682 | FeCl3      | SO4         | NA | SO4 + FeCl(C cisaconitat fumarate |
| 1683 | Fe(ClO4)2  | SO4         | NA | SO4 + Fe(C cisaconitat fumarate   |
| 1684 | Fe(ClO4)3  | SO4         | NA | SO4 + Fe(C cisaconitat fumarate   |
| 1685 | Fe Sulfide | SO4         | NA | SO4 + Fe(C cisaconitat fumarate   |
| 1686 | Fe Acetate | SO4         | NA | SO4 + Fe(C cisaconitat fumarate   |
| 1687 | Ferrocene  | SO4         | NA | SO4 + Fe(C cisaconitat fumarate   |
| 1688 | control    | SO4         | NA | SO4 + cont cisaconitat fumarate   |
| 1689 | FeCl2      | SO3         | NA | SO3 + FeCl(C cisaconitat fumarate |
| 1690 | FeCl3      | SO3         | NA | SO3 + FeCl(C cisaconitat fumarate |
| 1691 | Fe(ClO4)2  | SO3         | NA | SO3 + Fe(C cisaconitat fumarate   |

|      |            |             |    |             |                      |
|------|------------|-------------|----|-------------|----------------------|
| 1692 | Fe(ClO4)3  | SO3         | NA | SO3 + Fe(C  | cisaconitat fumarate |
| 1693 | Fe Sulfide | SO3         | NA | SO3 + Fe S  | cisaconitat fumarate |
| 1694 | Fe Acetate | SO3         | NA | SO3 + Fe A  | cisaconitat fumarate |
| 1695 | Ferrocene  | SO3         | NA | SO3 + Ferr  | cisaconitat fumarate |
| 1696 | control    | SO3         | NA | SO3 + cont  | cisaconitat fumarate |
| 1697 | FeCl2      | HSO3        | NA | HSO3 + Fe(C | cisaconitat fumarate |
| 1698 | FeCl3      | HSO3        | NA | HSO3 + Fe(C | cisaconitat fumarate |
| 1699 | Fe(ClO4)2  | HSO3        | NA | HSO3 + Fe(  | cisaconitat fumarate |
| 1700 | Fe(ClO4)3  | HSO3        | NA | HSO3 + Fe(  | cisaconitat fumarate |
| 1701 | Fe Sulfide | HSO3        | NA | HSO3 + Fe . | cisaconitat fumarate |
| 1702 | Fe Acetate | HSO3        | NA | HSO3 + Fe . | cisaconitat fumarate |
| 1703 | Ferrocene  | HSO3        | NA | HSO3 + Fer  | cisaconitat fumarate |
| 1704 | control    | HSO3        | NA | HSO3 + cor  | cisaconitat fumarate |
| 1705 | FeCl2      | DMSO        | NA | DMSO + Fe   | cisaconitat fumarate |
| 1706 | FeCl3      | DMSO        | NA | DMSO + Fe   | cisaconitat fumarate |
| 1707 | Fe(ClO4)2  | DMSO        | NA | DMSO + Fe   | cisaconitat fumarate |
| 1708 | Fe(ClO4)3  | DMSO        | NA | DMSO + Fe   | cisaconitat fumarate |
| 1709 | Fe Sulfide | DMSO        | NA | DMSO + Fe   | cisaconitat fumarate |
| 1710 | Fe Acetate | DMSO        | NA | DMSO + Fe   | cisaconitat fumarate |
| 1711 | Ferrocene  | DMSO        | NA | DMSO + Fe   | cisaconitat fumarate |
| 1712 | control    | DMSO        | NA | DMSO + co   | cisaconitat fumarate |
| 1713 | FeCl2      | Cys         | NA | Cys + FeCl2 | cisaconitat fumarate |
| 1714 | FeCl3      | Cys         | NA | Cys + FeCl3 | cisaconitat fumarate |
| 1715 | Fe(ClO4)2  | Cys         | NA | Cys + Fe(Cl | cisaconitat fumarate |
| 1716 | Fe(ClO4)3  | Cys         | NA | Cys + Fe(Cl | cisaconitat fumarate |
| 1717 | Fe Sulfide | Cys         | NA | Cys + Fe Su | cisaconitat fumarate |
| 1718 | Fe Acetate | Cys         | NA | Cys + Fe Ac | cisaconitat fumarate |
| 1719 | Ferrocene  | Cys         | NA | Cys + Ferro | cisaconitat fumarate |
| 1720 | control    | Cys         | NA | Cys + contr | cisaconitat fumarate |
| 1721 | FeCl2      | Methionin   | NA | Methionin   | cisaconitat fumarate |
| 1722 | FeCl3      | Methionin   | NA | Methionin   | cisaconitat fumarate |
| 1723 | Fe(ClO4)2  | Methionin   | NA | Methionin   | cisaconitat fumarate |
| 1724 | Fe(ClO4)3  | Methionin   | NA | Methionin   | cisaconitat fumarate |
| 1725 | Fe Sulfide | Methionin   | NA | Methionin   | cisaconitat fumarate |
| 1726 | Fe Acetate | Methionin   | NA | Methionin   | cisaconitat fumarate |
| 1727 | Ferrocene  | Methionin   | NA | Methionin   | cisaconitat fumarate |
| 1728 | control    | Methionin   | NA | Methionin   | cisaconitat fumarate |
| 1729 | FeCl2      | Homocyste   | NA | Homocyste   | cisaconitat fumarate |
| 1730 | FeCl3      | Homocyste   | NA | Homocyste   | cisaconitat fumarate |
| 1731 | Fe(ClO4)2  | Homocyste   | NA | Homocyste   | cisaconitat fumarate |
| 1732 | Fe(ClO4)3  | Homocyste   | NA | Homocyste   | cisaconitat fumarate |
| 1733 | Fe Sulfide | Homocyste   | NA | Homocyste   | cisaconitat fumarate |
| 1734 | Fe Acetate | Homocyste   | NA | Homocyste   | cisaconitat fumarate |
| 1735 | Ferrocene  | Homocyste   | NA | Homocyste   | cisaconitat fumarate |
| 1736 | control    | Homocyste   | NA | Homocyste   | cisaconitat fumarate |
| 1737 | FeCl2      | DL-Ethionir | NA | DL-Ethionir | cisaconitat fumarate |
| 1738 | FeCl3      | DL-Ethionir | NA | DL-Ethionir | cisaconitat fumarate |

|      |            |             |    |                          |          |
|------|------------|-------------|----|--------------------------|----------|
| 1739 | Fe(ClO4)2  | DL-Ethionir | NA | DL-Ethionir cisaconitat  | fumarate |
| 1740 | Fe(ClO4)3  | DL-Ethionir | NA | DL-Ethionir cisaconitat  | fumarate |
| 1741 | Fe Sulfide | DL-Ethionir | NA | DL-Ethionir cisaconitat  | fumarate |
| 1742 | Fe Acetate | DL-Ethionir | NA | DL-Ethionir cisaconitat  | fumarate |
| 1743 | Ferrocene  | DL-Ethionir | NA | DL-Ethionir cisaconitat  | fumarate |
| 1744 | control    | DL-Ethionir | NA | DL-Ethionir cisaconitat  | fumarate |
| 1745 | FeCl2      | 2-Mercapt   | NA | 2-Mercapt cisaconitat    | fumarate |
| 1746 | FeCl3      | 2-Mercapt   | NA | 2-Mercapt cisaconitat    | fumarate |
| 1747 | Fe(ClO4)2  | 2-Mercapt   | NA | 2-Mercapt cisaconitat    | fumarate |
| 1748 | Fe(ClO4)3  | 2-Mercapt   | NA | 2-Mercapt cisaconitat    | fumarate |
| 1749 | Fe Sulfide | 2-Mercapt   | NA | 2-Mercapt cisaconitat    | fumarate |
| 1750 | Fe Acetate | 2-Mercapt   | NA | 2-Mercapt cisaconitat    | fumarate |
| 1751 | Ferrocene  | 2-Mercapt   | NA | 2-Mercapt cisaconitat    | fumarate |
| 1752 | control    | 2-Mercapt   | NA | 2-Mercapt cisaconitat    | fumarate |
| 1753 | FeCl2      | control     | NA | control + Fe cisaconitat | fumarate |
| 1754 | FeCl3      | control     | NA | control + Fe cisaconitat | fumarate |
| 1755 | Fe(ClO4)2  | control     | NA | control + Fe cisaconitat | fumarate |
| 1756 | Fe(ClO4)3  | control     | NA | control + Fe cisaconitat | fumarate |
| 1757 | Fe Sulfide | control     | NA | control + Fe cisaconitat | fumarate |
| 1758 | Fe Acetate | control     | NA | control + Fe cisaconitat | fumarate |
| 1759 | Ferrocene  | control     | NA | control + Fe cisaconitat | fumarate |
| 1760 | control    | control     | NA | control + c cisaconitat  | fumarate |
| 1761 | FeCl2      | S2O8        | NA | S2O8 + FeC citrate       | fumarate |
| 1762 | FeCl3      | S2O8        | NA | S2O8 + FeC citrate       | fumarate |
| 1763 | Fe(ClO4)2  | S2O8        | NA | S2O8 + Fe( citrate       | fumarate |
| 1764 | Fe(ClO4)3  | S2O8        | NA | S2O8 + Fe( citrate       | fumarate |
| 1765 | Fe Sulfide | S2O8        | NA | S2O8 + Fe ! citrate      | fumarate |
| 1766 | Fe Acetate | S2O8        | NA | S2O8 + Fe , citrate      | fumarate |
| 1767 | Ferrocene  | S2O8        | NA | S2O8 + Fer citrate       | fumarate |
| 1768 | control    | S2O8        | NA | S2O8 + con citrate       | fumarate |
| 1769 | FeCl2      | SO4         | NA | SO4 + FeCl: citrate      | fumarate |
| 1770 | FeCl3      | SO4         | NA | SO4 + FeCl: citrate      | fumarate |
| 1771 | Fe(ClO4)2  | SO4         | NA | SO4 + Fe(C citrate       | fumarate |
| 1772 | Fe(ClO4)3  | SO4         | NA | SO4 + Fe(C citrate       | fumarate |
| 1773 | Fe Sulfide | SO4         | NA | SO4 + Fe Si citrate      | fumarate |
| 1774 | Fe Acetate | SO4         | NA | SO4 + Fe A: citrate      | fumarate |
| 1775 | Ferrocene  | SO4         | NA | SO4 + Ferr: citrate      | fumarate |
| 1776 | control    | SO4         | NA | SO4 + cont citrate       | fumarate |
| 1777 | FeCl2      | SO3         | NA | SO3 + FeCl: citrate      | fumarate |
| 1778 | FeCl3      | SO3         | NA | SO3 + FeCl: citrate      | fumarate |
| 1779 | Fe(ClO4)2  | SO3         | NA | SO3 + Fe(C citrate       | fumarate |
| 1780 | Fe(ClO4)3  | SO3         | NA | SO3 + Fe(C citrate       | fumarate |
| 1781 | Fe Sulfide | SO3         | NA | SO3 + Fe Si citrate      | fumarate |
| 1782 | Fe Acetate | SO3         | NA | SO3 + Fe A: citrate      | fumarate |
| 1783 | Ferrocene  | SO3         | NA | SO3 + Ferr: citrate      | fumarate |
| 1784 | control    | SO3         | NA | SO3 + cont citrate       | fumarate |
| 1785 | FeCl2      | HSO3        | NA | HSO3 + FeC citrate       | fumarate |

|      |            |             |    |                     |          |
|------|------------|-------------|----|---------------------|----------|
| 1786 | FeCl3      | HSO3        | NA | HSO3 + Fe( citrate  | fumarate |
| 1787 | Fe(ClO4)2  | HSO3        | NA | HSO3 + Fe( citrate  | fumarate |
| 1788 | Fe(ClO4)3  | HSO3        | NA | HSO3 + Fe( citrate  | fumarate |
| 1789 | Fe Sulfide | HSO3        | NA | HSO3 + Fe : citrate | fumarate |
| 1790 | Fe Acetate | HSO3        | NA | HSO3 + Fe : citrate | fumarate |
| 1791 | Ferrocene  | HSO3        | NA | HSO3 + Fer citrate  | fumarate |
| 1792 | control    | HSO3        | NA | HSO3 + cor citrate  | fumarate |
| 1793 | FeCl2      | DMSO        | NA | DMSO + Fe citrate   | fumarate |
| 1794 | FeCl3      | DMSO        | NA | DMSO + Fe citrate   | fumarate |
| 1795 | Fe(ClO4)2  | DMSO        | NA | DMSO + Fe citrate   | fumarate |
| 1796 | Fe(ClO4)3  | DMSO        | NA | DMSO + Fe citrate   | fumarate |
| 1797 | Fe Sulfide | DMSO        | NA | DMSO + Fe citrate   | fumarate |
| 1798 | Fe Acetate | DMSO        | NA | DMSO + Fe citrate   | fumarate |
| 1799 | Ferrocene  | DMSO        | NA | DMSO + Fe citrate   | fumarate |
| 1800 | control    | DMSO        | NA | DMSO + co citrate   | fumarate |
| 1801 | FeCl2      | Cys         | NA | Cys + FeCl2 citrate | fumarate |
| 1802 | FeCl3      | Cys         | NA | Cys + FeCl3 citrate | fumarate |
| 1803 | Fe(ClO4)2  | Cys         | NA | Cys + Fe(Cl citrate | fumarate |
| 1804 | Fe(ClO4)3  | Cys         | NA | Cys + Fe(Cl citrate | fumarate |
| 1805 | Fe Sulfide | Cys         | NA | Cys + Fe Su citrate | fumarate |
| 1806 | Fe Acetate | Cys         | NA | Cys + Fe Ac citrate | fumarate |
| 1807 | Ferrocene  | Cys         | NA | Cys + Ferro citrate | fumarate |
| 1808 | control    | Cys         | NA | Cys + contr citrate | fumarate |
| 1809 | FeCl2      | Methionin   | NA | Methionin citrate   | fumarate |
| 1810 | FeCl3      | Methionin   | NA | Methionin citrate   | fumarate |
| 1811 | Fe(ClO4)2  | Methionin   | NA | Methionin citrate   | fumarate |
| 1812 | Fe(ClO4)3  | Methionin   | NA | Methionin citrate   | fumarate |
| 1813 | Fe Sulfide | Methionin   | NA | Methionin citrate   | fumarate |
| 1814 | Fe Acetate | Methionin   | NA | Methionin citrate   | fumarate |
| 1815 | Ferrocene  | Methionin   | NA | Methionin citrate   | fumarate |
| 1816 | control    | Methionin   | NA | Methionin citrate   | fumarate |
| 1817 | FeCl2      | Homocyste   | NA | Homocyste citrate   | fumarate |
| 1818 | FeCl3      | Homocyste   | NA | Homocyste citrate   | fumarate |
| 1819 | Fe(ClO4)2  | Homocyste   | NA | Homocyste citrate   | fumarate |
| 1820 | Fe(ClO4)3  | Homocyste   | NA | Homocyste citrate   | fumarate |
| 1821 | Fe Sulfide | Homocyste   | NA | Homocyste citrate   | fumarate |
| 1822 | Fe Acetate | Homocyste   | NA | Homocyste citrate   | fumarate |
| 1823 | Ferrocene  | Homocyste   | NA | Homocyste citrate   | fumarate |
| 1824 | control    | Homocyste   | NA | Homocyste citrate   | fumarate |
| 1825 | FeCl2      | DL-Ethionir | NA | DL-Ethionir citrate | fumarate |
| 1826 | FeCl3      | DL-Ethionir | NA | DL-Ethionir citrate | fumarate |
| 1827 | Fe(ClO4)2  | DL-Ethionir | NA | DL-Ethionir citrate | fumarate |
| 1828 | Fe(ClO4)3  | DL-Ethionir | NA | DL-Ethionir citrate | fumarate |
| 1829 | Fe Sulfide | DL-Ethionir | NA | DL-Ethionir citrate | fumarate |
| 1830 | Fe Acetate | DL-Ethionir | NA | DL-Ethionir citrate | fumarate |
| 1831 | Ferrocene  | DL-Ethionir | NA | DL-Ethionir citrate | fumarate |
| 1832 | control    | DL-Ethionir | NA | DL-Ethionir citrate | fumarate |

|      |            |           |          |             |          |          |
|------|------------|-----------|----------|-------------|----------|----------|
| 1833 | FeCl2      | 2-Mercapt | NA       | 2-Mercapt   | citrate  | fumarate |
| 1834 | FeCl3      | 2-Mercapt | NA       | 2-Mercapt   | citrate  | fumarate |
| 1835 | Fe(ClO4)2  | 2-Mercapt | NA       | 2-Mercapt   | citrate  | fumarate |
| 1836 | Fe(ClO4)3  | 2-Mercapt | NA       | 2-Mercapt   | citrate  | fumarate |
| 1837 | Fe Sulfide | 2-Mercapt | NA       | 2-Mercapt   | citrate  | fumarate |
| 1838 | Fe Acetate | 2-Mercapt | NA       | 2-Mercapt   | citrate  | fumarate |
| 1839 | Ferrocene  | 2-Mercapt | NA       | 2-Mercapt   | citrate  | fumarate |
| 1840 | control    | 2-Mercapt | NA       | 2-Mercapt   | citrate  | fumarate |
| 1841 | FeCl2      | control   | NA       | control + F | citrate  | fumarate |
| 1842 | FeCl3      | control   | NA       | control + F | citrate  | fumarate |
| 1843 | Fe(ClO4)2  | control   | NA       | control + F | citrate  | fumarate |
| 1844 | Fe(ClO4)3  | control   | NA       | control + F | citrate  | fumarate |
| 1845 | Fe Sulfide | control   | NA       | control + F | citrate  | fumarate |
| 1846 | Fe Acetate | control   | NA       | control + F | citrate  | fumarate |
| 1847 | Ferrocene  | control   | NA       | control + F | citrate  | fumarate |
| 1848 | control    | control   | NA       | control + c | citrate  | fumarate |
| 1849 | FeCl2      | S2O8      | -3.55644 | S2O8 + FeC  | fumarate | fumarate |
| 1850 | FeCl3      | S2O8      | -4.18682 | S2O8 + FeC  | fumarate | fumarate |
| 1851 | Fe(ClO4)2  | S2O8      | -2.81824 | S2O8 + Fe(  | fumarate | fumarate |
| 1852 | Fe(ClO4)3  | S2O8      | -3.61869 | S2O8 + Fe(  | fumarate | fumarate |
| 1853 | Fe Sulfide | S2O8      | -4.08056 | S2O8 + Fe   | fumarate | fumarate |
| 1854 | Fe Acetate | S2O8      | -2.46499 | S2O8 + Fe   | fumarate | fumarate |
| 1855 | Ferrocene  | S2O8      | -2.9451  | S2O8 + Fer  | fumarate | fumarate |
| 1856 | control    | S2O8      | -3.51719 | S2O8 + con  | fumarate | fumarate |
| 1857 | FeCl2      | SO4       | -0.0228  | SO4 + FeCl: | fumarate | fumarate |
| 1858 | FeCl3      | SO4       | -0.03271 | SO4 + FeCl: | fumarate | fumarate |
| 1859 | Fe(ClO4)2  | SO4       | 0.470796 | SO4 + Fe(C  | fumarate | fumarate |
| 1860 | Fe(ClO4)3  | SO4       | 0.316573 | SO4 + Fe(C  | fumarate | fumarate |
| 1861 | Fe Sulfide | SO4       | -0.34234 | SO4 + Fe S  | fumarate | fumarate |
| 1862 | Fe Acetate | SO4       | 0.219441 | SO4 + Fe A  | fumarate | fumarate |
| 1863 | Ferrocene  | SO4       | 0.478725 | SO4 + Ferr  | fumarate | fumarate |
| 1864 | control    | SO4       | -0.47238 | SO4 + cont  | fumarate | fumarate |
| 1865 | FeCl2      | SO3       | 0.748715 | SO3 + FeCl: | fumarate | fumarate |
| 1866 | FeCl3      | SO3       | 0.418463 | SO3 + FeCl: | fumarate | fumarate |
| 1867 | Fe(ClO4)2  | SO3       | -0.15482 | SO3 + Fe(C  | fumarate | fumarate |
| 1868 | Fe(ClO4)3  | SO3       | 0.186931 | SO3 + Fe(C  | fumarate | fumarate |
| 1869 | Fe Sulfide | SO3       | 0.234506 | SO3 + Fe S  | fumarate | fumarate |
| 1870 | Fe Acetate | SO3       | 0.205168 | SO3 + Fe A  | fumarate | fumarate |
| 1871 | Ferrocene  | SO3       | -0.06006 | SO3 + Ferr  | fumarate | fumarate |
| 1872 | control    | SO3       | -0.18455 | SO3 + cont  | fumarate | fumarate |
| 1873 | FeCl2      | HSO3      | -0.14966 | HSO3 + FeC  | fumarate | fumarate |
| 1874 | FeCl3      | HSO3      | -0.01288 | HSO3 + FeC  | fumarate | fumarate |
| 1875 | Fe(ClO4)2  | HSO3      | -0.2016  | HSO3 + Fe(  | fumarate | fumarate |
| 1876 | Fe(ClO4)3  | HSO3      | -0.47912 | HSO3 + Fe(  | fumarate | fumarate |
| 1877 | Fe Sulfide | HSO3      | 1.43459  | HSO3 + Fe   | fumarate | fumarate |
| 1878 | Fe Acetate | HSO3      | -0.46921 | HSO3 + Fe   | fumarate | fumarate |
| 1879 | Ferrocene  | HSO3      | 3.131835 | HSO3 + Fer  | fumarate | fumarate |



|                 |             |          |             |          |          |
|-----------------|-------------|----------|-------------|----------|----------|
| 1880 control    | HSO3        | 1.733918 | HSO3 + cor  | fumarate | fumarate |
| 1881 FeCl2      | DMSO        | -0.53938 | DMSO + Fe   | fumarate | fumarate |
| 1882 FeCl3      | DMSO        | 1.296226 | DMSO + Fe   | fumarate | fumarate |
| 1883 Fe(ClO4)2  | DMSO        | 0.365734 | DMSO + Fe   | fumarate | fumarate |
| 1884 Fe(ClO4)3  | DMSO        | 0.958838 | DMSO + Fe   | fumarate | fumarate |
| 1885 Fe Sulfide | DMSO        | 0.219441 | DMSO + Fe   | fumarate | fumarate |
| 1886 Fe Acetate | DMSO        | 0.427979 | DMSO + Fe   | fumarate | fumarate |
| 1887 Ferrocene  | DMSO        | 0.309833 | DMSO + Fe   | fumarate | fumarate |
| 1888 control    | DMSO        | 0.778846 | DMSO + co   | fumarate | fumarate |
| 1889 FeCl2      | Cys         | -0.54731 | Cys + FeCl2 | fumarate | fumarate |
| 1890 FeCl3      | Cys         | -0.51441 | Cys + FeCl3 | fumarate | fumarate |
| 1891 Fe(ClO4)2  | Cys         | -0.96003 | Cys + Fe(Cl | fumarate | fumarate |
| 1892 Fe(ClO4)3  | Cys         | -0.63017 | Cys + Fe(Cl | fumarate | fumarate |
| 1893 Fe Sulfide | Cys         | 0.079887 | Cys + Fe Su | fumarate | fumarate |
| 1894 Fe Acetate | Cys         | 0.374456 | Cys + Fe Ac | fumarate | fumarate |
| 1895 Ferrocene  | Cys         | -0.04738 | Cys + Ferro | fumarate | fumarate |
| 1896 control    | Cys         | -0.71145 | Cys + contr | fumarate | fumarate |
| 1897 FeCl2      | Methionin   | 0.010903 | Methionin   | fumarate | fumarate |
| 1898 FeCl3      | Methionin   | 0.057288 | Methionin   | fumarate | fumarate |
| 1899 Fe(ClO4)2  | Methionin   | 0.223009 | Methionin   | fumarate | fumarate |
| 1900 Fe(ClO4)3  | Methionin   | 0.50172  | Methionin   | fumarate | fumarate |
| 1901 Fe Sulfide | Methionin   | 0.144113 | Methionin   | fumarate | fumarate |
| 1902 Fe Acetate | Methionin   | 0.457317 | Methionin   | fumarate | fumarate |
| 1903 Ferrocene  | Methionin   | -0.58141 | Methionin   | fumarate | fumarate |
| 1904 control    | Methionin   | -0.7733  | Methionin   | fumarate | fumarate |
| 1905 FeCl2      | Homocyste   | -0.21587 | Homocyste   | fumarate | fumarate |
| 1906 FeCl3      | Homocyste   | 0.921968 | Homocyste   | fumarate | fumarate |
| 1907 Fe(ClO4)2  | Homocyste   | -0.10922 | Homocyste   | fumarate | fumarate |
| 1908 Fe(ClO4)3  | Homocyste   | 0.941791 | Homocyste   | fumarate | fumarate |
| 1909 Fe Sulfide | Homocyste   | -0.0109  | Homocyste   | fumarate | fumarate |
| 1910 Fe Acetate | Homocyste   | 0.467625 | Homocyste   | fumarate | fumarate |
| 1911 Ferrocene  | Homocyste   | -0.45256 | Homocyste   | fumarate | fumarate |
| 1912 control    | Homocyste   | 0.090195 | Homocyste   | fumarate | fumarate |
| 1913 FeCl2      | DL-Ethionir | 0.682902 | DL-Ethionir | fumarate | fumarate |
| 1914 FeCl3      | DL-Ethionir | -0.19367 | DL-Ethionir | fumarate | fumarate |
| 1915 Fe(ClO4)2  | DL-Ethionir | 0.128651 | DL-Ethionir | fumarate | fumarate |
| 1916 Fe(ClO4)3  | DL-Ethionir | 0.598853 | DL-Ethionir | fumarate | fumarate |
| 1917 Fe Sulfide | DL-Ethionir | 0.325692 | DL-Ethionir | fumarate | fumarate |
| 1918 Fe Acetate | DL-Ethionir | 0.274152 | DL-Ethionir | fumarate | fumarate |
| 1919 Ferrocene  | DL-Ethionir | -0.72294 | DL-Ethionir | fumarate | fumarate |
| 1920 control    | DL-Ethionir | 0.441062 | DL-Ethionir | fumarate | fumarate |
| 1921 FeCl2      | 2-Mercapt   | -0.24283 | 2-Mercapt   | fumarate | fumarate |
| 1922 FeCl3      | 2-Mercapt   | 0.293182 | 2-Mercapt   | fumarate | fumarate |
| 1923 Fe(ClO4)2  | 2-Mercapt   | 0.722945 | 2-Mercapt   | fumarate | fumarate |
| 1924 Fe(ClO4)3  | 2-Mercapt   | 1.153104 | 2-Mercapt   | fumarate | fumarate |
| 1925 Fe Sulfide | 2-Mercapt   | -0.13539 | 2-Mercapt   | fumarate | fumarate |
| 1926 Fe Acetate | 2-Mercapt   | -0.23133 | 2-Mercapt   | fumarate | fumarate |

|      |                                    |                               |          |                                     |          |          |
|------|------------------------------------|-------------------------------|----------|-------------------------------------|----------|----------|
| 1927 | Ferrocene                          | 2-Mercapt                     | -0.49815 | 2-Mercapt                           | fumarate | fumarate |
| 1928 | control                            | 2-Mercapt                     | -0.14451 | 2-Mercapt                           | fumarate | fumarate |
| 1929 | FeCl <sub>2</sub>                  | control                       | 1.542031 | control + F                         | fumarate | fumarate |
| 1930 | FeCl <sub>3</sub>                  | control                       | 0.129841 | control + F                         | fumarate | fumarate |
| 1931 | Fe(ClO <sub>4</sub> ) <sub>2</sub> | control                       | 0.473968 | control + F                         | fumarate | fumarate |
| 1932 | Fe(ClO <sub>4</sub> ) <sub>3</sub> | control                       | 0.225387 | control + F                         | fumarate | fumarate |
| 1933 | Fe Sulfide                         | control                       | -0.59132 | control + F                         | fumarate | fumarate |
| 1934 | Fe Acetate                         | control                       | 0.451766 | control + F                         | fumarate | fumarate |
| 1935 | Ferrocene                          | control                       | -0.43948 | control + F                         | fumarate | fumarate |
| 1936 | control                            | control                       | 0.893026 | control + c                         | fumarate | fumarate |
| 1937 | FeCl <sub>2</sub>                  | S <sub>2</sub> O <sub>8</sub> | -0.32113 | S <sub>2</sub> O <sub>8</sub> + FeC | malate   | fumarate |
| 1938 | FeCl <sub>3</sub>                  | S <sub>2</sub> O <sub>8</sub> | -1.23101 | S <sub>2</sub> O <sub>8</sub> + FeC | malate   | fumarate |
| 1939 | Fe(ClO <sub>4</sub> ) <sub>2</sub> | S <sub>2</sub> O <sub>8</sub> | -2.40849 | S <sub>2</sub> O <sub>8</sub> + Fe( | malate   | fumarate |
| 1940 | Fe(ClO <sub>4</sub> ) <sub>3</sub> | S <sub>2</sub> O <sub>8</sub> | 0.214088 | S <sub>2</sub> O <sub>8</sub> + Fe( | malate   | fumarate |
| 1941 | Fe Sulfide                         | S <sub>2</sub> O <sub>8</sub> | -2.30145 | S <sub>2</sub> O <sub>8</sub> + Fe  | malate   | fumarate |
| 1942 | Fe Acetate                         | S <sub>2</sub> O <sub>8</sub> | 0.374655 | S <sub>2</sub> O <sub>8</sub> + Fe  | malate   | fumarate |
| 1943 | Ferrocene                          | S <sub>2</sub> O <sub>8</sub> | -1.01692 | S <sub>2</sub> O <sub>8</sub> + Fer | malate   | fumarate |
| 1944 | control                            | S <sub>2</sub> O <sub>8</sub> | -1.33805 | S <sub>2</sub> O <sub>8</sub> + con | malate   | fumarate |
| 1945 | FeCl <sub>2</sub>                  | SO <sub>4</sub>               | -0.10704 | SO <sub>4</sub> + FeCl:             | malate   | fumarate |
| 1946 | FeCl <sub>3</sub>                  | SO <sub>4</sub>               | -0.26761 | SO <sub>4</sub> + FeCl:             | malate   | fumarate |
| 1947 | Fe(ClO <sub>4</sub> ) <sub>2</sub> | SO <sub>4</sub>               | 1.070442 | SO <sub>4</sub> + Fe(C              | malate   | fumarate |
| 1948 | Fe(ClO <sub>4</sub> ) <sub>3</sub> | SO <sub>4</sub>               | -0.26761 | SO <sub>4</sub> + Fe(C              | malate   | fumarate |
| 1949 | Fe Sulfide                         | SO <sub>4</sub>               | 0.321133 | SO <sub>4</sub> + Fe S              | malate   | fumarate |
| 1950 | Fe Acetate                         | SO <sub>4</sub>               | 0.214088 | SO <sub>4</sub> + Fe A              | malate   | fumarate |
| 1951 | Ferrocene                          | SO <sub>4</sub>               | 0.802831 | SO <sub>4</sub> + Ferr              | malate   | fumarate |
| 1952 | control                            | SO <sub>4</sub>               | -0.37465 | SO <sub>4</sub> + cont              | malate   | fumarate |
| 1953 | FeCl <sub>2</sub>                  | SO <sub>3</sub>               | 1.070442 | SO <sub>3</sub> + FeCl:             | malate   | fumarate |
| 1954 | FeCl <sub>3</sub>                  | SO <sub>3</sub>               | -0.64227 | SO <sub>3</sub> + FeCl:             | malate   | fumarate |
| 1955 | Fe(ClO <sub>4</sub> ) <sub>2</sub> | SO <sub>3</sub>               | -0.42818 | SO <sub>3</sub> + Fe(C              | malate   | fumarate |
| 1956 | Fe(ClO <sub>4</sub> ) <sub>3</sub> | SO <sub>3</sub>               | -0.69579 | SO <sub>3</sub> + Fe(C              | malate   | fumarate |
| 1957 | Fe Sulfide                         | SO <sub>3</sub>               | 0.160566 | SO <sub>3</sub> + Fe S              | malate   | fumarate |
| 1958 | Fe Acetate                         | SO <sub>3</sub>               | 0.856353 | SO <sub>3</sub> + Fe A              | malate   | fumarate |
| 1959 | Ferrocene                          | SO <sub>3</sub>               | -0.10704 | SO <sub>3</sub> + Ferr              | malate   | fumarate |
| 1960 | control                            | SO <sub>3</sub>               | -0.16057 | SO <sub>3</sub> + cont              | malate   | fumarate |
| 1961 | FeCl <sub>2</sub>                  | HSO <sub>3</sub>              | -0.74931 | HSO <sub>3</sub> + FeC              | malate   | fumarate |
| 1962 | FeCl <sub>3</sub>                  | HSO <sub>3</sub>              | 0.535221 | HSO <sub>3</sub> + FeC              | malate   | fumarate |
| 1963 | Fe(ClO <sub>4</sub> ) <sub>2</sub> | HSO <sub>3</sub>              | -0.37465 | HSO <sub>3</sub> + Fe(              | malate   | fumarate |
| 1964 | Fe(ClO <sub>4</sub> ) <sub>3</sub> | HSO <sub>3</sub>              | 0.107044 | HSO <sub>3</sub> + Fe(              | malate   | fumarate |
| 1965 | Fe Sulfide                         | HSO <sub>3</sub>              | 1.552141 | HSO <sub>3</sub> + Fe               | malate   | fumarate |
| 1966 | Fe Acetate                         | HSO <sub>3</sub>              | 0.374655 | HSO <sub>3</sub> + Fe               | malate   | fumarate |
| 1967 | Ferrocene                          | HSO <sub>3</sub>              | 0.107044 | HSO <sub>3</sub> + Fer              | malate   | fumarate |
| 1968 | control                            | HSO <sub>3</sub>              | 0.160566 | HSO <sub>3</sub> + cor              | malate   | fumarate |
| 1969 | FeCl <sub>2</sub>                  | DMSO                          | 0.749309 | DMSO + Fe                           | malate   | fumarate |
| 1970 | FeCl <sub>3</sub>                  | DMSO                          | 0.107044 | DMSO + Fe                           | malate   | fumarate |
| 1971 | Fe(ClO <sub>4</sub> ) <sub>2</sub> | DMSO                          | 0.107044 | DMSO + Fe                           | malate   | fumarate |
| 1972 | Fe(ClO <sub>4</sub> ) <sub>3</sub> | DMSO                          | 0.107044 | DMSO + Fe                           | malate   | fumarate |
| 1973 | Fe Sulfide                         | DMSO                          | 1.070442 | DMSO + Fe                           | malate   | fumarate |

|      |                                    |             |          |                                |          |
|------|------------------------------------|-------------|----------|--------------------------------|----------|
| 1974 | Fe Acetate                         | DMSO        | -0.10704 | DMSO + Fe malate               | fumarate |
| 1975 | Ferrocene                          | DMSO        | 0.642265 | DMSO + Fe malate               | fumarate |
| 1976 | control                            | DMSO        | -0.26761 | DMSO + co malate               | fumarate |
| 1977 | FeCl <sub>2</sub>                  | Cys         | 0.107044 | Cys + FeCl <sub>2</sub> malate | fumarate |
| 1978 | FeCl <sub>3</sub>                  | Cys         | 1.123964 | Cys + FeCl <sub>3</sub> malate | fumarate |
| 1979 | Fe(ClO <sub>4</sub> ) <sub>2</sub> | Cys         | -0.42818 | Cys + Fe(Cl malate             | fumarate |
| 1980 | Fe(ClO <sub>4</sub> ) <sub>3</sub> | Cys         | 1.766229 | Cys + Fe(Cl malate             | fumarate |
| 1981 | Fe Sulfide                         | Cys         | -1.33805 | Cys + Fe Su malate             | fumarate |
| 1982 | Fe Acetate                         | Cys         | 0.053522 | Cys + Fe Ac malate             | fumarate |
| 1983 | Ferrocene                          | Cys         | 0.107044 | Cys + Ferro malate             | fumarate |
| 1984 | control                            | Cys         | -0.64227 | Cys + contr malate             | fumarate |
| 1985 | FeCl <sub>2</sub>                  | Methionine  | -0.37465 | Methionine malate              | fumarate |
| 1986 | FeCl <sub>3</sub>                  | Methionine  | -0.90988 | Methionine malate              | fumarate |
| 1987 | Fe(ClO <sub>4</sub> ) <sub>2</sub> | Methionine  | 0.374655 | Methionine malate              | fumarate |
| 1988 | Fe(ClO <sub>4</sub> ) <sub>3</sub> | Methionine  | -0.69579 | Methionine malate              | fumarate |
| 1989 | Fe Sulfide                         | Methionine  | -0.16057 | Methionine malate              | fumarate |
| 1990 | Fe Acetate                         | Methionine  | 0.321133 | Methionine malate              | fumarate |
| 1991 | Ferrocene                          | Methionine  | -1.4451  | Methionine malate              | fumarate |
| 1992 | control                            | Methionine  | -0.53522 | Methionine malate              | fumarate |
| 1993 | FeCl <sub>2</sub>                  | Homocyste   | -0.80283 | Homocyste malate               | fumarate |
| 1994 | FeCl <sub>3</sub>                  | Homocyste   | 0.481699 | Homocyste malate               | fumarate |
| 1995 | Fe(ClO <sub>4</sub> ) <sub>2</sub> | Homocyste   | -0.16057 | Homocyste malate               | fumarate |
| 1996 | Fe(ClO <sub>4</sub> ) <sub>3</sub> | Homocyste   | 0.749309 | Homocyste malate               | fumarate |
| 1997 | Fe Sulfide                         | Homocyste   | -0.32113 | Homocyste malate               | fumarate |
| 1998 | Fe Acetate                         | Homocyste   | -0.10704 | Homocyste malate               | fumarate |
| 1999 | Ferrocene                          | Homocyste   | 0.374655 | Homocyste malate               | fumarate |
| 2000 | control                            | Homocyste   | 0        | Homocyste malate               | fumarate |
| 2001 | FeCl <sub>2</sub>                  | DL-Ethionir | 0        | DL-Ethionir malate             | fumarate |
| 2002 | FeCl <sub>3</sub>                  | DL-Ethionir | 0.428177 | DL-Ethionir malate             | fumarate |
| 2003 | Fe(ClO <sub>4</sub> ) <sub>2</sub> | DL-Ethionir | 1.605663 | DL-Ethionir malate             | fumarate |
| 2004 | Fe(ClO <sub>4</sub> ) <sub>3</sub> | DL-Ethionir | 0.695787 | DL-Ethionir malate             | fumarate |
| 2005 | Fe Sulfide                         | DL-Ethionir | 0.963398 | DL-Ethionir malate             | fumarate |
| 2006 | Fe Acetate                         | DL-Ethionir | 0.107044 | DL-Ethionir malate             | fumarate |
| 2007 | Ferrocene                          | DL-Ethionir | 1.28453  | DL-Ethionir malate             | fumarate |
| 2008 | control                            | DL-Ethionir | 1.391574 | DL-Ethionir malate             | fumarate |
| 2009 | FeCl <sub>2</sub>                  | 2-Mercapt   | -0.05352 | 2-Mercapt malate               | fumarate |
| 2010 | FeCl <sub>3</sub>                  | 2-Mercapt   | -0.53522 | 2-Mercapt malate               | fumarate |
| 2011 | Fe(ClO <sub>4</sub> ) <sub>2</sub> | 2-Mercapt   | -1.4451  | 2-Mercapt malate               | fumarate |
| 2012 | Fe(ClO <sub>4</sub> ) <sub>3</sub> | 2-Mercapt   | -0.64227 | 2-Mercapt malate               | fumarate |
| 2013 | Fe Sulfide                         | 2-Mercapt   | 1.980317 | 2-Mercapt malate               | fumarate |
| 2014 | Fe Acetate                         | 2-Mercapt   | -0.42818 | 2-Mercapt malate               | fumarate |
| 2015 | Ferrocene                          | 2-Mercapt   | -0.90988 | 2-Mercapt malate               | fumarate |
| 2016 | control                            | 2-Mercapt   | -0.05352 | 2-Mercapt malate               | fumarate |
| 2017 | FeCl <sub>2</sub>                  | control     | -1.12396 | control + F malate             | fumarate |
| 2018 | FeCl <sub>3</sub>                  | control     | 0.107044 | control + F malate             | fumarate |
| 2019 | Fe(ClO <sub>4</sub> ) <sub>2</sub> | control     | 0.963398 | control + F malate             | fumarate |
| 2020 | Fe(ClO <sub>4</sub> ) <sub>3</sub> | control     | -1.07044 | control + F malate             | fumarate |

|      |                                    |                               |          |                                                 |          |
|------|------------------------------------|-------------------------------|----------|-------------------------------------------------|----------|
| 2021 | Fe Sulfide                         | control                       | 0        | control + Fimalate                              | fumarate |
| 2022 | Fe Acetate                         | control                       | 0.107044 | control + Fimalate                              | fumarate |
| 2023 | Ferrocene                          | control                       | 0.107044 | control + Fimalate                              | fumarate |
| 2024 | control                            | control                       | 1.445096 | control + cimamate                              | fumarate |
| 2025 | FeCl <sub>2</sub>                  | S <sub>2</sub> O <sub>8</sub> | 0.554886 | S <sub>2</sub> O <sub>8</sub> + FeC oxaloaceta  | fumarate |
| 2026 | FeCl <sub>3</sub>                  | S <sub>2</sub> O <sub>8</sub> | 1.616408 | S <sub>2</sub> O <sub>8</sub> + FeC oxaloaceta  | fumarate |
| 2027 | Fe(ClO <sub>4</sub> ) <sub>2</sub> | S <sub>2</sub> O <sub>8</sub> | 1.347581 | S <sub>2</sub> O <sub>8</sub> + Fe( oxaloaceta  | fumarate |
| 2028 | Fe(ClO <sub>4</sub> ) <sub>3</sub> | S <sub>2</sub> O <sub>8</sub> | 0.61003  | S <sub>2</sub> O <sub>8</sub> + Fe( oxaloaceta  | fumarate |
| 2029 | Fe Sulfide                         | S <sub>2</sub> O <sub>8</sub> | 1.774947 | S <sub>2</sub> O <sub>8</sub> + Fe ! oxaloaceta | fumarate |
| 2030 | Fe Acetate                         | S <sub>2</sub> O <sub>8</sub> | 0.396347 | S <sub>2</sub> O <sub>8</sub> + Fe , oxaloaceta | fumarate |
| 2031 | Ferrocene                          | S <sub>2</sub> O <sub>8</sub> | 0.589351 | S <sub>2</sub> O <sub>8</sub> + Fer oxaloaceta  | fumarate |
| 2032 | control                            | S <sub>2</sub> O <sub>8</sub> | 1.457869 | S <sub>2</sub> O <sub>8</sub> + con oxaloaceta  | fumarate |
| 2033 | FeCl <sub>2</sub>                  | SO <sub>4</sub>               | -0.32052 | SO <sub>4</sub> + FeCl: oxaloaceta              | fumarate |
| 2034 | FeCl <sub>3</sub>                  | SO <sub>4</sub>               | 0.348096 | SO <sub>4</sub> + FeCl: oxaloaceta              | fumarate |
| 2035 | Fe(ClO <sub>4</sub> ) <sub>2</sub> | SO <sub>4</sub>               | -0.35499 | SO <sub>4</sub> + Fe(C oxaloaceta               | fumarate |
| 2036 | Fe(ClO <sub>4</sub> ) <sub>3</sub> | SO <sub>4</sub>               | -0.22402 | SO <sub>4</sub> + Fe(C oxaloaceta               | fumarate |
| 2037 | Fe Sulfide                         | SO <sub>4</sub>               | -0.02413 | SO <sub>4</sub> + Fe S: oxaloaceta              | fumarate |
| 2038 | Fe Acetate                         | SO <sub>4</sub>               | -0.88575 | SO <sub>4</sub> + Fe A: oxaloaceta              | fumarate |
| 2039 | Ferrocene                          | SO <sub>4</sub>               | 1.2304   | SO <sub>4</sub> + Ferr: oxaloaceta              | fumarate |
| 2040 | control                            | SO <sub>4</sub>               | 0.706532 | SO <sub>4</sub> + cont oxaloaceta               | fumarate |
| 2041 | FeCl <sub>2</sub>                  | SO <sub>3</sub>               | -0.29295 | SO <sub>3</sub> + FeCl: oxaloaceta              | fumarate |
| 2042 | FeCl <sub>3</sub>                  | SO <sub>3</sub>               | 0.313631 | SO <sub>3</sub> + FeCl: oxaloaceta              | fumarate |
| 2043 | Fe(ClO <sub>4</sub> ) <sub>2</sub> | SO <sub>3</sub>               | 0.306738 | SO <sub>3</sub> + Fe(C oxaloaceta               | fumarate |
| 2044 | Fe(ClO <sub>4</sub> ) <sub>3</sub> | SO <sub>3</sub>               | -0.16199 | SO <sub>3</sub> + Fe(C oxaloaceta               | fumarate |
| 2045 | Fe Sulfide                         | SO <sub>3</sub>               | 1.609515 | SO <sub>3</sub> + Fe S: oxaloaceta              | fumarate |
| 2046 | Fe Acetate                         | SO <sub>3</sub>               | -1.17526 | SO <sub>3</sub> + Fe A: oxaloaceta              | fumarate |
| 2047 | Ferrocene                          | SO <sub>3</sub>               | 0.368775 | SO <sub>3</sub> + Ferr: oxaloaceta              | fumarate |
| 2048 | control                            | SO <sub>3</sub>               | -0.41703 | SO <sub>3</sub> + cont oxaloaceta               | fumarate |
| 2049 | FeCl <sub>2</sub>                  | HSO <sub>3</sub>              | -0.27227 | HSO <sub>3</sub> + FeC oxaloaceta               | fumarate |
| 2050 | FeCl <sub>3</sub>                  | HSO <sub>3</sub>              | 0.554886 | HSO <sub>3</sub> + FeC oxaloaceta               | fumarate |
| 2051 | Fe(ClO <sub>4</sub> ) <sub>2</sub> | HSO <sub>3</sub>              | 0.465277 | HSO <sub>3</sub> + Fe( oxaloaceta               | fumarate |
| 2052 | Fe(ClO <sub>4</sub> ) <sub>3</sub> | HSO <sub>3</sub>              | -0.30674 | HSO <sub>3</sub> + Fe( oxaloaceta               | fumarate |
| 2053 | Fe Sulfide                         | HSO <sub>3</sub>              | -0.21713 | HSO <sub>3</sub> + Fe : oxaloaceta              | fumarate |
| 2054 | Fe Acetate                         | HSO <sub>3</sub>              | 0.547993 | HSO <sub>3</sub> + Fe . oxaloaceta              | fumarate |
| 2055 | Ferrocene                          | HSO <sub>3</sub>              | -0.6445  | HSO <sub>3</sub> + Fer oxaloaceta               | fumarate |
| 2056 | control                            | HSO <sub>3</sub>              | 0.024125 | HSO <sub>3</sub> + cor oxaloaceta               | fumarate |
| 2057 | FeCl <sub>2</sub>                  | DMSO                          | -0.39635 | DMSO + Fe oxaloaceta                            | fumarate |
| 2058 | FeCl <sub>3</sub>                  | DMSO                          | 0.95468  | DMSO + Fe oxaloaceta                            | fumarate |
| 2059 | Fe(ClO <sub>4</sub> ) <sub>2</sub> | DMSO                          | -1.45787 | DMSO + Fe oxaloaceta                            | fumarate |
| 2060 | Fe(ClO <sub>4</sub> ) <sub>3</sub> | DMSO                          | -0.85818 | DMSO + Fe oxaloaceta                            | fumarate |
| 2061 | Fe Sulfide                         | DMSO                          | 0.630709 | DMSO + Fe oxaloaceta                            | fumarate |
| 2062 | Fe Acetate                         | DMSO                          | 0.782355 | DMSO + Fe oxaloaceta                            | fumarate |
| 2063 | Ferrocene                          | DMSO                          | -1.09254 | DMSO + Fe oxaloaceta                            | fumarate |
| 2064 | control                            | DMSO                          | -0.28606 | DMSO + co oxaloaceta                            | fumarate |
| 2065 | FeCl <sub>2</sub>                  | Cys                           | 0.161985 | Cys + FeCl <sub>2</sub> oxaloaceta              | fumarate |
| 2066 | FeCl <sub>3</sub>                  | Cys                           | 0.292952 | Cys + FeCl <sub>3</sub> oxaloaceta              | fumarate |
| 2067 | Fe(ClO <sub>4</sub> ) <sub>2</sub> | Cys                           | 0.161985 | Cys + Fe(Cl: oxaloaceta                         | fumarate |

|      |            |             |          |                                 |
|------|------------|-------------|----------|---------------------------------|
| 2068 | Fe(ClO4)3  | Cys         | -0.38256 | Cys + Fe(Cl oxaloaceta fumarate |
| 2069 | Fe Sulfide | Cys         | -0.23092 | Cys + Fe Su oxaloaceta fumarate |
| 2070 | Fe Acetate | Cys         | -0.92022 | Cys + Fe Ac oxaloaceta fumarate |
| 2071 | Ferrocene  | Cys         | 0.327417 | Cys + Ferro oxaloaceta fumarate |
| 2072 | control    | Cys         | -1.36826 | Cys + contr oxaloaceta fumarate |
| 2073 | FeCl2      | Methionine  | -1.10633 | Methionine oxaloaceta fumarate  |
| 2074 | FeCl3      | Methionine  | -0.47906 | Methionine oxaloaceta fumarate  |
| 2075 | Fe(ClO4)2  | Methionine  | -0.1482  | Methionine oxaloaceta fumarate  |
| 2076 | Fe(ClO4)3  | Methionine  | -0.07927 | Methionine oxaloaceta fumarate  |
| 2077 | Fe Sulfide | Methionine  | 1.002931 | Methionine oxaloaceta fumarate  |
| 2078 | Fe Acetate | Methionine  | -0.86507 | Methionine oxaloaceta fumarate  |
| 2079 | Ferrocene  | Methionine  | -0.20334 | Methionine oxaloaceta fumarate  |
| 2080 | control    | Methionine  | 1.044289 | Methionine oxaloaceta fumarate  |
| 2081 | FeCl2      | Homocyste   | 0.575565 | Homocyste oxaloaceta fumarate   |
| 2082 | FeCl3      | Homocyste   | 0.19645  | Homocyste oxaloaceta fumarate   |
| 2083 | Fe(ClO4)2  | Homocyste   | 0.444598 | Homocyste oxaloaceta fumarate   |
| 2084 | Fe(ClO4)3  | Homocyste   | 0.217129 | Homocyste oxaloaceta fumarate   |
| 2085 | Fe Sulfide | Homocyste   | 0.444598 | Homocyste oxaloaceta fumarate   |
| 2086 | Fe Acetate | Homocyste   | -1.55437 | Homocyste oxaloaceta fumarate   |
| 2087 | Ferrocene  | Homocyste   | 0.40324  | Homocyste oxaloaceta fumarate   |
| 2088 | control    | Homocyste   | 0.010339 | Homocyste oxaloaceta fumarate   |
| 2089 | FeCl2      | DL-Ethionir | 0.513528 | DL-Ethionir oxaloaceta fumarate |
| 2090 | FeCl3      | DL-Ethionir | 0.237808 | DL-Ethionir oxaloaceta fumarate |
| 2091 | Fe(ClO4)2  | DL-Ethionir | 0.568672 | DL-Ethionir oxaloaceta fumarate |
| 2092 | Fe(ClO4)3  | DL-Ethionir | -0.18266 | DL-Ethionir oxaloaceta fumarate |
| 2093 | Fe Sulfide | DL-Ethionir | -0.01034 | DL-Ethionir oxaloaceta fumarate |
| 2094 | Fe Acetate | DL-Ethionir | -0.2447  | DL-Ethionir oxaloaceta fumarate |
| 2095 | Ferrocene  | DL-Ethionir | -0.68585 | DL-Ethionir oxaloaceta fumarate |
| 2096 | control    | DL-Ethionir | -1.85766 | DL-Ethionir oxaloaceta fumarate |
| 2097 | FeCl2      | 2-Mercapt   | -0.71343 | 2-Mercapt oxaloaceta fumarate   |
| 2098 | FeCl3      | 2-Mercapt   | 0.106841 | 2-Mercapt oxaloaceta fumarate   |
| 2099 | Fe(ClO4)2  | 2-Mercapt   | -0.09995 | 2-Mercapt oxaloaceta fumarate   |
| 2100 | Fe(ClO4)3  | 2-Mercapt   | -1.11322 | 2-Mercapt oxaloaceta fumarate   |
| 2101 | Fe Sulfide | 2-Mercapt   | -0.741   | 2-Mercapt oxaloaceta fumarate   |
| 2102 | Fe Acetate | 2-Mercapt   | -0.90643 | 2-Mercapt oxaloaceta fumarate   |
| 2103 | Ferrocene  | 2-Mercapt   | 0.47217  | 2-Mercapt oxaloaceta fumarate   |
| 2104 | control    | 2-Mercapt   | 0.485956 | 2-Mercapt oxaloaceta fumarate   |
| 2105 | FeCl2      | control     | -0.18266 | control + F oxaloaceta fumarate |
| 2106 | FeCl3      | control     | 0.086162 | control + F oxaloaceta fumarate |
| 2107 | Fe(ClO4)2  | control     | 0.19645  | control + F oxaloaceta fumarate |
| 2108 | Fe(ClO4)3  | control     | 0.134413 | control + F oxaloaceta fumarate |
| 2109 | Fe Sulfide | control     | -0.48596 | control + F oxaloaceta fumarate |
| 2110 | Fe Acetate | control     | 0.182664 | control + F oxaloaceta fumarate |
| 2111 | Ferrocene  | control     | 0.878857 | control + F oxaloaceta fumarate |
| 2112 | control    | control     | -0.03102 | control + c oxaloaceta fumarate |
| 2113 | FeCl2      | S2O8        | 3.587009 | S2O8 + FeC pyruvate fumarate    |
| 2114 | FeCl3      | S2O8        | 6.754076 | S2O8 + FeC pyruvate fumarate    |

|      |            |            |          |                             |          |
|------|------------|------------|----------|-----------------------------|----------|
| 2115 | Fe(ClO4)2  | S2O8       | 3.044584 | S2O8 + Fe(I) pyruvate       | fumarate |
| 2116 | Fe(ClO4)3  | S2O8       | 4.181928 | S2O8 + Fe(II) pyruvate      | fumarate |
| 2117 | Fe Sulfide | S2O8       | 4.549378 | S2O8 + Fe(III) pyruvate     | fumarate |
| 2118 | Fe Acetate | S2O8       | 3.482024 | S2O8 + Fe(IV) pyruvate      | fumarate |
| 2119 | Ferrocene  | S2O8       | 5.844201 | S2O8 + Ferrocene pyruvate   | fumarate |
| 2120 | control    | S2O8       | 4.09444  | S2O8 + control pyruvate     | fumarate |
| 2121 | FeCl2      | SO4        | 0.314957 | SO4 + FeCl2 pyruvate        | fumarate |
| 2122 | FeCl3      | SO4        | -0.19247 | SO4 + FeCl3 pyruvate        | fumarate |
| 2123 | Fe(ClO4)2  | SO4        | -0.06999 | SO4 + Fe(ClO4)2 pyruvate    | fumarate |
| 2124 | Fe(ClO4)3  | SO4        | -0.27996 | SO4 + Fe(ClO4)3 pyruvate    | fumarate |
| 2125 | Fe Sulfide | SO4        | -0.61242 | SO4 + Fe Sulfide pyruvate   | fumarate |
| 2126 | Fe Acetate | SO4        | 0.384947 | SO4 + Fe Acetate pyruvate   | fumarate |
| 2127 | Ferrocene  | SO4        | -0.85738 | SO4 + Ferrocene pyruvate    | fumarate |
| 2128 | control    | SO4        | -0.035   | SO4 + control pyruvate      | fumarate |
| 2129 | FeCl2      | SO3        | 0.244966 | SO3 + FeCl2 pyruvate        | fumarate |
| 2130 | FeCl3      | SO3        | -0.45494 | SO3 + FeCl3 pyruvate        | fumarate |
| 2131 | Fe(ClO4)2  | SO3        | 0.822388 | SO3 + Fe(ClO4)2 pyruvate    | fumarate |
| 2132 | Fe(ClO4)3  | SO3        | -1.10235 | SO3 + Fe(ClO4)3 pyruvate    | fumarate |
| 2133 | Fe Sulfide | SO3        | -0.99736 | SO3 + Fe Sulfide pyruvate   | fumarate |
| 2134 | Fe Acetate | SO3        | 1.294823 | SO3 + Fe Acetate pyruvate   | fumarate |
| 2135 | Ferrocene  | SO3        | -0.59492 | SO3 + Ferrocene pyruvate    | fumarate |
| 2136 | control    | SO3        | -0.27996 | SO3 + control pyruvate      | fumarate |
| 2137 | FeCl2      | HSO3       | 0.542426 | HSO3 + FeCl2 pyruvate       | fumarate |
| 2138 | FeCl3      | HSO3       | -0.36745 | HSO3 + FeCl3 pyruvate       | fumarate |
| 2139 | Fe(ClO4)2  | HSO3       | 0.402445 | HSO3 + Fe(ClO4)2 pyruvate   | fumarate |
| 2140 | Fe(ClO4)3  | HSO3       | 0.122483 | HSO3 + Fe(ClO4)3 pyruvate   | fumarate |
| 2141 | Fe Sulfide | HSO3       | 0.909876 | HSO3 + Fe Sulfide pyruvate  | fumarate |
| 2142 | Fe Acetate | HSO3       | 1.347316 | HSO3 + Fe Acetate pyruvate  | fumarate |
| 2143 | Ferrocene  | HSO3       | 0.962368 | HSO3 + Ferrocene pyruvate   | fumarate |
| 2144 | control    | HSO3       | -0.24497 | HSO3 + control pyruvate     | fumarate |
| 2145 | FeCl2      | DMSO       | -0.96237 | DMSO + FeCl2 pyruvate       | fumarate |
| 2146 | FeCl3      | DMSO       | 0.087488 | DMSO + FeCl3 pyruvate       | fumarate |
| 2147 | Fe(ClO4)2  | DMSO       | 0        | DMSO + Fe(ClO4)2 pyruvate   | fumarate |
| 2148 | Fe(ClO4)3  | DMSO       | -0.48993 | DMSO + Fe(ClO4)3 pyruvate   | fumarate |
| 2149 | Fe Sulfide | DMSO       | -0.66491 | DMSO + Fe Sulfide pyruvate  | fumarate |
| 2150 | Fe Acetate | DMSO       | 1.382311 | DMSO + Fe Acetate pyruvate  | fumarate |
| 2151 | Ferrocene  | DMSO       | -0.34995 | DMSO + Ferrocene pyruvate   | fumarate |
| 2152 | control    | DMSO       | 0.122483 | DMSO + control pyruvate     | fumarate |
| 2153 | FeCl2      | Cys        | 2.41467  | Cys + FeCl2 pyruvate        | fumarate |
| 2154 | FeCl3      | Cys        | 3.167067 | Cys + FeCl3 pyruvate        | fumarate |
| 2155 | Fe(ClO4)2  | Cys        | 2.729627 | Cys + Fe(ClO4)2 pyruvate    | fumarate |
| 2156 | Fe(ClO4)3  | Cys        | 3.324545 | Cys + Fe(ClO4)3 pyruvate    | fumarate |
| 2157 | Fe Sulfide | Cys        | 1.417306 | Cys + Fe Sulfide pyruvate   | fumarate |
| 2158 | Fe Acetate | Cys        | 3.464526 | Cys + Fe Acetate pyruvate   | fumarate |
| 2159 | Ferrocene  | Cys        | -0.89238 | Cys + Ferrocene pyruvate    | fumarate |
| 2160 | control    | Cys        | -0.61242 | Cys + control pyruvate      | fumarate |
| 2161 | FeCl2      | Methionine | 0.36745  | Methionine + FeCl2 pyruvate | fumarate |

|      |            |             |          |                       |          |
|------|------------|-------------|----------|-----------------------|----------|
| 2162 | FeCl3      | Methionine  | -0.85738 | Methionine pyruvate   | fumarate |
| 2163 | Fe(ClO4)2  | Methionine  | 0.052493 | Methionine pyruvate   | fumarate |
| 2164 | Fe(ClO4)3  | Methionine  | -0.62991 | Methionine pyruvate   | fumarate |
| 2165 | Fe Sulfide | Methionine  | -0.52493 | Methionine pyruvate   | fumarate |
| 2166 | Fe Acetate | Methionine  | 0        | Methionine pyruvate   | fumarate |
| 2167 | Ferrocene  | Methionine  | 0.647411 | Methionine pyruvate   | fumarate |
| 2168 | control    | Methionine  | -0.33245 | Methionine pyruvate   | fumarate |
| 2169 | FeCl2      | Homocyste   | 1.294823 | Homocyste pyruvate    | fumarate |
| 2170 | FeCl3      | Homocyste   | 0.297459 | Homocyste pyruvate    | fumarate |
| 2171 | Fe(ClO4)2  | Homocyste   | -0.19247 | Homocyste pyruvate    | fumarate |
| 2172 | Fe(ClO4)3  | Homocyste   | -0.22747 | Homocyste pyruvate    | fumarate |
| 2173 | Fe Sulfide | Homocyste   | -0.08749 | Homocyste pyruvate    | fumarate |
| 2174 | Fe Acetate | Homocyste   | -0.48993 | Homocyste pyruvate    | fumarate |
| 2175 | Ferrocene  | Homocyste   | 0.314957 | Homocyste pyruvate    | fumarate |
| 2176 | control    | Homocyste   | -0.89238 | Homocyste pyruvate    | fumarate |
| 2177 | FeCl2      | DL-Ethionir | -0.68241 | DL-Ethionir pyruvate  | fumarate |
| 2178 | FeCl3      | DL-Ethionir | -0.06999 | DL-Ethionir pyruvate  | fumarate |
| 2179 | Fe(ClO4)2  | DL-Ethionir | -0.36745 | DL-Ethionir pyruvate  | fumarate |
| 2180 | Fe(ClO4)3  | DL-Ethionir | -0.10499 | DL-Ethionir pyruvate  | fumarate |
| 2181 | Fe Sulfide | DL-Ethionir | -0.31496 | DL-Ethionir pyruvate  | fumarate |
| 2182 | Fe Acetate | DL-Ethionir | 0.507431 | DL-Ethionir pyruvate  | fumarate |
| 2183 | Ferrocene  | DL-Ethionir | 0.384947 | DL-Ethionir pyruvate  | fumarate |
| 2184 | control    | DL-Ethionir | -0.19247 | DL-Ethionir pyruvate  | fumarate |
| 2185 | FeCl2      | 2-Mercapt   | -0.06999 | 2-Mercapt pyruvate    | fumarate |
| 2186 | FeCl3      | 2-Mercapt   | 0.192474 | 2-Mercapt pyruvate    | fumarate |
| 2187 | Fe(ClO4)2  | 2-Mercapt   | 0.262464 | 2-Mercapt pyruvate    | fumarate |
| 2188 | Fe(ClO4)3  | 2-Mercapt   | -0.10499 | 2-Mercapt pyruvate    | fumarate |
| 2189 | Fe Sulfide | 2-Mercapt   | -0.08749 | 2-Mercapt pyruvate    | fumarate |
| 2190 | Fe Acetate | 2-Mercapt   | 0.612416 | 2-Mercapt pyruvate    | fumarate |
| 2191 | Ferrocene  | 2-Mercapt   | -0.15748 | 2-Mercapt pyruvate    | fumarate |
| 2192 | control    | 2-Mercapt   | 0.244966 | 2-Mercapt pyruvate    | fumarate |
| 2193 | FeCl2      | control     | 0.06999  | control + F pyruvate  | fumarate |
| 2194 | FeCl3      | control     | 0.332455 | control + F pyruvate  | fumarate |
| 2195 | Fe(ClO4)2  | control     | 0.787392 | control + F pyruvate  | fumarate |
| 2196 | Fe(ClO4)3  | control     | 0.244966 | control + F pyruvate  | fumarate |
| 2197 | Fe Sulfide | control     | -0.83989 | control + F pyruvate  | fumarate |
| 2198 | Fe Acetate | control     | 0.314957 | control + F pyruvate  | fumarate |
| 2199 | Ferrocene  | control     | -0.87488 | control + F pyruvate  | fumarate |
| 2200 | control    | control     | -0.87488 | control + c pyruvate  | fumarate |
| 2201 | FeCl2      | S2O8        | 2.808207 | S2O8 + FeC succinate  | fumarate |
| 2202 | FeCl3      | S2O8        | 5.016723 | S2O8 + FeC succinate  | fumarate |
| 2203 | Fe(ClO4)2  | S2O8        | 2.543516 | S2O8 + Fe(i succinate | fumarate |
| 2204 | Fe(ClO4)3  | S2O8        | 4.404625 | S2O8 + Fe(i succinate | fumarate |
| 2205 | Fe Sulfide | S2O8        | 4.958822 | S2O8 + Fe ' succinate | fumarate |
| 2206 | Fe Acetate | S2O8        | 2.692405 | S2O8 + Fe / succinate | fumarate |
| 2207 | Ferrocene  | S2O8        | 4.867834 | S2O8 + Fer succinate  | fumarate |
| 2208 | control    | S2O8        | 6.91919  | S2O8 + con succinate  | fumarate |

|      |                                    |                  |          |                                                                 |          |
|------|------------------------------------|------------------|----------|-----------------------------------------------------------------|----------|
| 2209 | FeCl <sub>2</sub>                  | SO <sub>4</sub>  | -0.01241 | SO <sub>4</sub> + FeCl <sub>2</sub> succinate                   | fumarate |
| 2210 | FeCl <sub>3</sub>                  | SO <sub>4</sub>  | -0.45907 | SO <sub>4</sub> + FeCl <sub>3</sub> succinate                   | fumarate |
| 2211 | Fe(ClO <sub>4</sub> ) <sub>2</sub> | SO <sub>4</sub>  | -0.16957 | SO <sub>4</sub> + Fe(ClO <sub>4</sub> ) <sub>2</sub> succinate  | fumarate |
| 2212 | Fe(ClO <sub>4</sub> ) <sub>3</sub> | SO <sub>4</sub>  | 0.103395 | SO <sub>4</sub> + Fe(ClO <sub>4</sub> ) <sub>3</sub> succinate  | fumarate |
| 2213 | Fe Sulfide                         | SO <sub>4</sub>  | -0.14475 | SO <sub>4</sub> + Fe Sulfide succinate                          | fumarate |
| 2214 | Fe Acetate                         | SO <sub>4</sub>  | 0.053765 | SO <sub>4</sub> + Fe Acetate succinate                          | fumarate |
| 2215 | Ferrocene                          | SO <sub>4</sub>  | -0.9471  | SO <sub>4</sub> + Ferrocene succinate                           | fumarate |
| 2216 | control                            | SO <sub>4</sub>  | 0.839567 | SO <sub>4</sub> + control succinate                             | fumarate |
| 2217 | FeCl <sub>2</sub>                  | SO <sub>3</sub>  | 0.765123 | SO <sub>3</sub> + FeCl <sub>2</sub> succinate                   | fumarate |
| 2218 | FeCl <sub>3</sub>                  | SO <sub>3</sub>  | -0.52525 | SO <sub>3</sub> + FeCl <sub>3</sub> succinate                   | fumarate |
| 2219 | Fe(ClO <sub>4</sub> ) <sub>2</sub> | SO <sub>3</sub>  | -0.31846 | SO <sub>3</sub> + Fe(ClO <sub>4</sub> ) <sub>2</sub> succinate  | fumarate |
| 2220 | Fe(ClO <sub>4</sub> ) <sub>3</sub> | SO <sub>3</sub>  | 0.500432 | SO <sub>3</sub> + Fe(ClO <sub>4</sub> ) <sub>3</sub> succinate  | fumarate |
| 2221 | Fe Sulfide                         | SO <sub>3</sub>  | -0.11994 | SO <sub>3</sub> + Fe Sulfide succinate                          | fumarate |
| 2222 | Fe Acetate                         | SO <sub>3</sub>  | 0.244012 | SO <sub>3</sub> + Fe Acetate succinate                          | fumarate |
| 2223 | Ferrocene                          | SO <sub>3</sub>  | 1.335863 | SO <sub>3</sub> + Ferrocene succinate                           | fumarate |
| 2224 | control                            | SO <sub>3</sub>  | -0.60796 | SO <sub>3</sub> + control succinate                             | fumarate |
| 2225 | FeCl <sub>2</sub>                  | HSO <sub>3</sub> | 0.44253  | HSO <sub>3</sub> + FeCl <sub>2</sub> succinate                  | fumarate |
| 2226 | FeCl <sub>3</sub>                  | HSO <sub>3</sub> | 0.037222 | HSO <sub>3</sub> + FeCl <sub>3</sub> succinate                  | fumarate |
| 2227 | Fe(ClO <sub>4</sub> ) <sub>2</sub> | HSO <sub>3</sub> | 0.153025 | HSO <sub>3</sub> + Fe(ClO <sub>4</sub> ) <sub>2</sub> succinate | fumarate |
| 2228 | Fe(ClO <sub>4</sub> ) <sub>3</sub> | HSO <sub>3</sub> | -0.51697 | HSO <sub>3</sub> + Fe(ClO <sub>4</sub> ) <sub>3</sub> succinate | fumarate |
| 2229 | Fe Sulfide                         | HSO <sub>3</sub> | -0.24401 | HSO <sub>3</sub> + Fe Sulfide succinate                         | fumarate |
| 2230 | Fe Acetate                         | HSO <sub>3</sub> | 0.392901 | HSO <sub>3</sub> + Fe Acetate succinate                         | fumarate |
| 2231 | Ferrocene                          | HSO <sub>3</sub> | -0.11167 | HSO <sub>3</sub> + Ferrocene succinate                          | fumarate |
| 2232 | control                            | HSO <sub>3</sub> | 1.277962 | HSO <sub>3</sub> + control succinate                            | fumarate |
| 2233 | FeCl <sub>2</sub>                  | DMSO             | -0.8313  | DMSO + FeCl <sub>2</sub> succinate                              | fumarate |
| 2234 | FeCl <sub>3</sub>                  | DMSO             | 0.69895  | DMSO + FeCl <sub>3</sub> succinate                              | fumarate |
| 2235 | Fe(ClO <sub>4</sub> ) <sub>2</sub> | DMSO             | -0.05377 | DMSO + Fe(ClO <sub>4</sub> ) <sub>2</sub> succinate             | fumarate |
| 2236 | Fe(ClO <sub>4</sub> ) <sub>3</sub> | DMSO             | -0.59969 | DMSO + Fe(ClO <sub>4</sub> ) <sub>3</sub> succinate             | fumarate |
| 2237 | Fe Sulfide                         | DMSO             | 0.086852 | DMSO + Fe Sulfide succinate                                     | fumarate |
| 2238 | Fe Acetate                         | DMSO             | 0.268827 | DMSO + Fe Acetate succinate                                     | fumarate |
| 2239 | Ferrocene                          | DMSO             | -0.23574 | DMSO + Ferrocene succinate                                      | fumarate |
| 2240 | control                            | DMSO             | 0.566604 | DMSO + control succinate                                        | fumarate |
| 2241 | FeCl <sub>2</sub>                  | Cys              | -0.40944 | Cys + FeCl <sub>2</sub> succinate                               | fumarate |
| 2242 | FeCl <sub>3</sub>                  | Cys              | -0.8313  | Cys + FeCl <sub>3</sub> succinate                               | fumarate |
| 2243 | Fe(ClO <sub>4</sub> ) <sub>2</sub> | Cys              | -0.40117 | Cys + Fe(ClO <sub>4</sub> ) <sub>2</sub> succinate              | fumarate |
| 2244 | Fe(ClO <sub>4</sub> ) <sub>3</sub> | Cys              | -0.10339 | Cys + Fe(ClO <sub>4</sub> ) <sub>3</sub> succinate              | fumarate |
| 2245 | Fe Sulfide                         | Cys              | -0.61623 | Cys + Fe Sulfide succinate                                      | fumarate |
| 2246 | Fe Acetate                         | Cys              | 0.12821  | Cys + Fe Acetate succinate                                      | fumarate |
| 2247 | Ferrocene                          | Cys              | -1.10426 | Cys + Ferrocene succinate                                       | fumarate |
| 2248 | control                            | Cys              | 1.104258 | Cys + control succinate                                         | fumarate |
| 2249 | FeCl <sub>2</sub>                  | Methionine       | -0.44253 | Methionine + FeCl <sub>2</sub> succinate                        | fumarate |
| 2250 | FeCl <sub>3</sub>                  | Methionine       | 0.963641 | Methionine + FeCl <sub>3</sub> succinate                        | fumarate |
| 2251 | Fe(ClO <sub>4</sub> ) <sub>2</sub> | Methionine       | -0.35981 | Methionine + Fe(ClO <sub>4</sub> ) <sub>2</sub> succinate       | fumarate |
| 2252 | Fe(ClO <sub>4</sub> ) <sub>3</sub> | Methionine       | 0.070309 | Methionine + Fe(ClO <sub>4</sub> ) <sub>3</sub> succinate       | fumarate |
| 2253 | Fe Sulfide                         | Methionine       | 0.219197 | Methionine + Fe Sulfide succinate                               | fumarate |
| 2254 | Fe Acetate                         | Methionine       | -0.45907 | Methionine + Fe Acetate succinate                               | fumarate |
| 2255 | Ferrocene                          | Methionine       | 0.665863 | Methionine + Ferrocene succinate                                | fumarate |



|      |            |             |          |                        |          |
|------|------------|-------------|----------|------------------------|----------|
| 2256 | control    | Methionine  | -0.03722 | Methionine succinate   | fumarate |
| 2257 | FeCl2      | Homocyste   | 1.129073 | Homocyste succinate    | fumarate |
| 2258 | FeCl3      | Homocyste   | 0.417716 | Homocyste succinate    | fumarate |
| 2259 | Fe(ClO4)2  | Homocyste   | -0.70722 | Homocyste succinate    | fumarate |
| 2260 | Fe(ClO4)3  | Homocyste   | -0.00414 | Homocyste succinate    | fumarate |
| 2261 | Fe Sulfide | Homocyste   | 0.591419 | Homocyste succinate    | fumarate |
| 2262 | Fe Acetate | Homocyste   | -0.04549 | Homocyste succinate    | fumarate |
| 2263 | Ferrocene  | Homocyste   | -0.8892  | Homocyste succinate    | fumarate |
| 2264 | control    | Homocyste   | -0.58315 | Homocyste succinate    | fumarate |
| 2265 | FeCl2      | DL-Ethionir | -1.005   | DL-Ethionir succinate  | fumarate |
| 2266 | FeCl3      | DL-Ethionir | -0.44253 | DL-Ethionir succinate  | fumarate |
| 2267 | Fe(ClO4)2  | DL-Ethionir | 0.004136 | DL-Ethionir succinate  | fumarate |
| 2268 | Fe(ClO4)3  | DL-Ethionir | 0.244012 | DL-Ethionir succinate  | fumarate |
| 2269 | Fe Sulfide | DL-Ethionir | -0.55006 | DL-Ethionir succinate  | fumarate |
| 2270 | Fe Acetate | DL-Ethionir | -0.28537 | DL-Ethionir succinate  | fumarate |
| 2271 | Ferrocene  | DL-Ethionir | -0.40117 | DL-Ethionir succinate  | fumarate |
| 2272 | control    | DL-Ethionir | -0.29364 | DL-Ethionir succinate  | fumarate |
| 2273 | FeCl2      | 2-Mercapti  | -0.66586 | 2-Mercapti succinate   | fumarate |
| 2274 | FeCl3      | 2-Mercapti  | 0.384629 | 2-Mercapti succinate   | fumarate |
| 2275 | Fe(ClO4)2  | 2-Mercapti  | 0.599691 | 2-Mercapti succinate   | fumarate |
| 2276 | Fe(ClO4)3  | 2-Mercapti  | 0.516975 | 2-Mercapti succinate   | fumarate |
| 2277 | Fe Sulfide | 2-Mercapti  | 0.475617 | 2-Mercapti succinate   | fumarate |
| 2278 | Fe Acetate | 2-Mercapti  | -0.35154 | 2-Mercapti succinate   | fumarate |
| 2279 | Ferrocene  | 2-Mercapti  | -0.52525 | 2-Mercapti succinate   | fumarate |
| 2280 | control    | 2-Mercapti  | 0.111667 | 2-Mercapti succinate   | fumarate |
| 2281 | FeCl2      | control     | -0.79821 | control + Fe succinate | fumarate |
| 2282 | FeCl3      | control     | -0.59969 | control + Fe succinate | fumarate |
| 2283 | Fe(ClO4)2  | control     | 0.425987 | control + Fe succinate | fumarate |
| 2284 | Fe(ClO4)3  | control     | 0.020679 | control + Fe succinate | fumarate |
| 2285 | Fe Sulfide | control     | -0.335   | control + Fe succinate | fumarate |
| 2286 | Fe Acetate | control     | 0.086852 | control + Fe succinate | fumarate |
| 2287 | Ferrocene  | control     | -0.57488 | control + Fe succinate | fumarate |
| 2288 | control    | control     | 0.301913 | control + Fe succinate | fumarate |
| 2289 | FeCl2      | S2O8        | 2.010532 | S2O8 + FeC succsemial  | fumarate |
| 2290 | FeCl3      | S2O8        | 1.130007 | S2O8 + FeC succsemial  | fumarate |
| 2291 | Fe(ClO4)2  | S2O8        | 0.631043 | S2O8 + Fe(C succsemial | fumarate |
| 2292 | Fe(ClO4)3  | S2O8        | 0.719095 | S2O8 + Fe(C succsemial | fumarate |
| 2293 | Fe Sulfide | S2O8        | 0.54299  | S2O8 + Fe(C succsemial | fumarate |
| 2294 | Fe Acetate | S2O8        | 0.601692 | S2O8 + Fe(C succsemial | fumarate |
| 2295 | Ferrocene  | S2O8        | 1.863777 | S2O8 + Fe(C succsemial | fumarate |
| 2296 | control    | S2O8        | 1.364813 | S2O8 + con succsemial  | fumarate |
| 2297 | FeCl2      | SO4         | -0.8365  | SO4 + FeCl2 succsemial | fumarate |
| 2298 | FeCl3      | SO4         | 0.807148 | SO4 + FeCl3 succsemial | fumarate |
| 2299 | Fe(ClO4)2  | SO4         | 0.484289 | SO4 + Fe(C succsemial  | fumarate |
| 2300 | Fe(ClO4)3  | SO4         | -0.7778  | SO4 + Fe(C succsemial  | fumarate |
| 2301 | Fe Sulfide | SO4         | -0.8365  | SO4 + Fe(Si succsemial | fumarate |
| 2302 | Fe Acetate | SO4         | -0.04403 | SO4 + Fe(Ai succsemial | fumarate |

|      |            |           |          |             |                     |
|------|------------|-----------|----------|-------------|---------------------|
| 2303 | Ferrocene  | SO4       | 0.19078  | SO4 + Ferr  | succsemial fumarate |
| 2304 | control    | SO4       | -0.8365  | SO4 + cont  | succsemial fumarate |
| 2305 | FeCl2      | SO3       | -0.7778  | SO3 + FeCl  | succsemial fumarate |
| 2306 | FeCl3      | SO3       | -0.48429 | SO3 + FeCl  | succsemial fumarate |
| 2307 | Fe(ClO4)2  | SO3       | -0.27883 | SO3 + Fe(C  | succsemial fumarate |
| 2308 | Fe(ClO4)3  | SO3       | 0.425587 | SO3 + Fe(C  | succsemial fumarate |
| 2309 | Fe Sulfide | SO3       | 0.220131 | SO3 + Fe S  | succsemial fumarate |
| 2310 | Fe Acetate | SO3       | -0.45494 | SO3 + Fe A  | succsemial fumarate |
| 2311 | Ferrocene  | SO3       | 0.719095 | SO3 + Ferr  | succsemial fumarate |
| 2312 | control    | SO3       | -0.63104 | SO3 + cont  | succsemial fumarate |
| 2313 | FeCl2      | HSO3      | -0.13208 | HSO3 + Fe(C | succsemial fumarate |
| 2314 | FeCl3      | HSO3      | 0.044026 | HSO3 + Fe(C | succsemial fumarate |
| 2315 | Fe(ClO4)2  | HSO3      | -1.10066 | HSO3 + Fe(  | succsemial fumarate |
| 2316 | Fe(ClO4)3  | HSO3      | -0.68974 | HSO3 + Fe(  | succsemial fumarate |
| 2317 | Fe Sulfide | HSO3      | 0.073377 | HSO3 + Fe   | succsemial fumarate |
| 2318 | Fe Acetate | HSO3      | -0.04403 | HSO3 + Fe   | succsemial fumarate |
| 2319 | Ferrocene  | HSO3      | -0.48429 | HSO3 + Fer  | succsemial fumarate |
| 2320 | control    | HSO3      | 0.19078  | HSO3 + cor  | succsemial fumarate |
| 2321 | FeCl2      | DMSO      | -0.7191  | DMSO + Fe   | succsemial fumarate |
| 2322 | FeCl3      | DMSO      | 0.454938 | DMSO + Fe   | succsemial fumarate |
| 2323 | Fe(ClO4)2  | DMSO      | 0.454938 | DMSO + Fe   | succsemial fumarate |
| 2324 | Fe(ClO4)3  | DMSO      | 0.54299  | DMSO + Fe   | succsemial fumarate |
| 2325 | Fe Sulfide | DMSO      | -0.7191  | DMSO + Fe   | succsemial fumarate |
| 2326 | Fe Acetate | DMSO      | 0.16143  | DMSO + Fe   | succsemial fumarate |
| 2327 | Ferrocene  | DMSO      | -0.22013 | DMSO + Fe   | succsemial fumarate |
| 2328 | control    | DMSO      | -0.33753 | DMSO + co   | succsemial fumarate |
| 2329 | FeCl2      | Cys       | 0.484289 | Cys + FeCl2 | succsemial fumarate |
| 2330 | FeCl3      | Cys       | -0.30818 | Cys + FeCl3 | succsemial fumarate |
| 2331 | Fe(ClO4)2  | Cys       | -0.74845 | Cys + Fe(Cl | succsemial fumarate |
| 2332 | Fe(ClO4)3  | Cys       | -0.07338 | Cys + Fe(Cl | succsemial fumarate |
| 2333 | Fe Sulfide | Cys       | 0.16143  | Cys + Fe Su | succsemial fumarate |
| 2334 | Fe Acetate | Cys       | 1.452866 | Cys + Fe Ac | succsemial fumarate |
| 2335 | Ferrocene  | Cys       | 0.396236 | Cys + Ferro | succsemial fumarate |
| 2336 | control    | Cys       | 0.366885 | Cys + contr | succsemial fumarate |
| 2337 | FeCl2      | Methionin | -0.22013 | Methionin   | succsemial fumarate |
| 2338 | FeCl3      | Methionin | 0.16143  | Methionin   | succsemial fumarate |
| 2339 | Fe(ClO4)2  | Methionin | 0.073377 | Methionin   | succsemial fumarate |
| 2340 | Fe(ClO4)3  | Methionin | 0.660394 | Methionin   | succsemial fumarate |
| 2341 | Fe Sulfide | Methionin | -0.66039 | Methionin   | succsemial fumarate |
| 2342 | Fe Acetate | Methionin | 0.337534 | Methionin   | succsemial fumarate |
| 2343 | Ferrocene  | Methionin | -0.39624 | Methionin   | succsemial fumarate |
| 2344 | control    | Methionin | -0.36689 | Methionin   | succsemial fumarate |
| 2345 | FeCl2      | Homocyste | -0.04403 | Homocyste   | succsemial fumarate |
| 2346 | FeCl3      | Homocyste | 0.16143  | Homocyste   | succsemial fumarate |
| 2347 | Fe(ClO4)2  | Homocyste | -0.8365  | Homocyste   | succsemial fumarate |
| 2348 | Fe(ClO4)3  | Homocyste | -0.54299 | Homocyste   | succsemial fumarate |
| 2349 | Fe Sulfide | Homocyste | -0.45494 | Homocyste   | succsemial fumarate |

|      |                                    |                 |          |                                           |
|------|------------------------------------|-----------------|----------|-------------------------------------------|
| 2350 | Fe Acetate                         | Homocyste       | -0.8952  | Homocyste succsemial fumarate             |
| 2351 | Ferrocene                          | Homocyste       | 0.014675 | Homocyste succsemial fumarate             |
| 2352 | control                            | Homocyste       | 0.337534 | Homocyste succsemial fumarate             |
| 2353 | FeCl <sub>2</sub>                  | DL-Ethionir     | 0.366885 | DL-Ethionir succsemial fumarate           |
| 2354 | FeCl <sub>3</sub>                  | DL-Ethionir     | -0.01468 | DL-Ethionir succsemial fumarate           |
| 2355 | Fe(ClO <sub>4</sub> ) <sub>2</sub> | DL-Ethionir     | 0.54299  | DL-Ethionir succsemial fumarate           |
| 2356 | Fe(ClO <sub>4</sub> ) <sub>3</sub> | DL-Ethionir     | -0.57234 | DL-Ethionir succsemial fumarate           |
| 2357 | Fe Sulfide                         | DL-Ethionir     | -0.13208 | DL-Ethionir succsemial fumarate           |
| 2358 | Fe Acetate                         | DL-Ethionir     | 0.19078  | DL-Ethionir succsemial fumarate           |
| 2359 | Ferrocene                          | DL-Ethionir     | -0.13208 | DL-Ethionir succsemial fumarate           |
| 2360 | control                            | DL-Ethionir     | 0.484289 | DL-Ethionir succsemial fumarate           |
| 2361 | FeCl <sub>2</sub>                  | 2-Mercapt       | 0.777797 | 2-Mercapt succsemial fumarate             |
| 2362 | FeCl <sub>3</sub>                  | 2-Mercapt       | 1.188708 | 2-Mercapt succsemial fumarate             |
| 2363 | Fe(ClO <sub>4</sub> ) <sub>2</sub> | 2-Mercapt       | -0.10273 | 2-Mercapt succsemial fumarate             |
| 2364 | Fe(ClO <sub>4</sub> ) <sub>3</sub> | 2-Mercapt       | 0.014675 | 2-Mercapt succsemial fumarate             |
| 2365 | Fe Sulfide                         | 2-Mercapt       | -0.07338 | 2-Mercapt succsemial fumarate             |
| 2366 | Fe Acetate                         | 2-Mercapt       | -0.07338 | 2-Mercapt succsemial fumarate             |
| 2367 | Ferrocene                          | 2-Mercapt       | -0.33753 | 2-Mercapt succsemial fumarate             |
| 2368 | control                            | 2-Mercapt       | -0.33753 | 2-Mercapt succsemial fumarate             |
| 2369 | FeCl <sub>2</sub>                  | control         | 0.748446 | control + F succsemial fumarate           |
| 2370 | FeCl <sub>3</sub>                  | control         | 1.364813 | control + F succsemial fumarate           |
| 2371 | Fe(ClO <sub>4</sub> ) <sub>2</sub> | control         | 0.278833 | control + F succsemial fumarate           |
| 2372 | Fe(ClO <sub>4</sub> ) <sub>3</sub> | control         | -0.7778  | control + F succsemial fumarate           |
| 2373 | Fe Sulfide                         | control         | 0.220131 | control + F succsemial fumarate           |
| 2374 | Fe Acetate                         | control         | 0.396236 | control + F succsemial fumarate           |
| 2375 | Ferrocene                          | control         | 0.19078  | control + F succsemial fumarate           |
| 2376 | control                            | control         | -0.10273 | control + c succsemial fumarate           |
| 2377 | FeCl <sub>2</sub>                  | S2O8            | NA       | S2O8 + FeC alphaketog malate              |
| 2378 | FeCl <sub>3</sub>                  | S2O8            | NA       | S2O8 + FeC alphaketog malate              |
| 2379 | Fe(ClO <sub>4</sub> ) <sub>2</sub> | S2O8            | NA       | S2O8 + Fe( alphaketog malate              |
| 2380 | Fe(ClO <sub>4</sub> ) <sub>3</sub> | S2O8            | NA       | S2O8 + Fe( alphaketog malate              |
| 2381 | Fe Sulfide                         | S2O8            | NA       | S2O8 + Fe ! alphaketog malate             |
| 2382 | Fe Acetate                         | S2O8            | NA       | S2O8 + Fe , alphaketog malate             |
| 2383 | Ferrocene                          | S2O8            | NA       | S2O8 + Fer alphaketog malate              |
| 2384 | control                            | S2O8            | NA       | S2O8 + con alphaketog malate              |
| 2385 | FeCl <sub>2</sub>                  | control         | NA       | control + F alphaketog malate             |
| 2386 | FeCl <sub>3</sub>                  | control         | NA       | control + F alphaketog malate             |
| 2387 | Fe(ClO <sub>4</sub> ) <sub>2</sub> | control         | NA       | control + F alphaketog malate             |
| 2388 | Fe(ClO <sub>4</sub> ) <sub>3</sub> | control         | NA       | control + F alphaketog malate             |
| 2389 | Fe Sulfide                         | control         | NA       | control + F alphaketog malate             |
| 2390 | Fe Acetate                         | control         | NA       | control + F alphaketog malate             |
| 2391 | Ferrocene                          | control         | NA       | control + F alphaketog malate             |
| 2392 | control                            | control         | NA       | control + c alphaketog malate             |
| 2393 | FeCl <sub>2</sub>                  | SO <sub>4</sub> | NA       | SO <sub>4</sub> + FeCl: alphaketog malate |
| 2394 | FeCl <sub>3</sub>                  | SO <sub>4</sub> | NA       | SO <sub>4</sub> + FeCl: alphaketog malate |
| 2395 | Fe(ClO <sub>4</sub> ) <sub>2</sub> | SO <sub>4</sub> | NA       | SO <sub>4</sub> + Fe(C alphaketog malate  |
| 2396 | Fe(ClO <sub>4</sub> ) <sub>3</sub> | SO <sub>4</sub> | NA       | SO <sub>4</sub> + Fe(C alphaketog malate  |

|      |            |                      |    |                                                |
|------|------------|----------------------|----|------------------------------------------------|
| 2397 | Fe Sulfide | SO4                  | NA | SO4 + Fe S $\alpha$ lphaketog malate           |
| 2398 | Fe Acetate | SO4                  | NA | SO4 + Fe A $\alpha$ lphaketog malate           |
| 2399 | Ferrocene  | SO4                  | NA | SO4 + Ferr $\alpha$ lphaketog malate           |
| 2400 | control    | SO4                  | NA | SO4 + cont $\alpha$ lphaketog malate           |
| 2401 | FeCl2      | SO3                  | NA | SO3 + FeCl $\alpha$ lphaketog malate           |
| 2402 | FeCl3      | SO3                  | NA | SO3 + FeCl $\alpha$ lphaketog malate           |
| 2403 | Fe(ClO4)2  | SO3                  | NA | SO3 + Fe(C $\alpha$ lphaketog malate           |
| 2404 | Fe(ClO4)3  | SO3                  | NA | SO3 + Fe(C $\alpha$ lphaketog malate           |
| 2405 | Fe Sulfide | SO3                  | NA | SO3 + Fe S $\alpha$ lphaketog malate           |
| 2406 | Fe Acetate | SO3                  | NA | SO3 + Fe A $\alpha$ lphaketog malate           |
| 2407 | Ferrocene  | SO3                  | NA | SO3 + Ferr $\alpha$ lphaketog malate           |
| 2408 | control    | SO3                  | NA | SO3 + cont $\alpha$ lphaketog malate           |
| 2409 | FeCl2      | HSO3                 | NA | HSO3 + FeC $\alpha$ lphaketog malate           |
| 2410 | FeCl3      | HSO3                 | NA | HSO3 + FeC $\alpha$ lphaketog malate           |
| 2411 | Fe(ClO4)2  | HSO3                 | NA | HSO3 + Fe( $\alpha$ lphaketog malate           |
| 2412 | Fe(ClO4)3  | HSO3                 | NA | HSO3 + Fe( $\alpha$ lphaketog malate           |
| 2413 | Fe Sulfide | HSO3                 | NA | HSO3 + Fe $\alpha$ lphaketog malate            |
| 2414 | Fe Acetate | HSO3                 | NA | HSO3 + Fe $\alpha$ lphaketog malate            |
| 2415 | Ferrocene  | HSO3                 | NA | HSO3 + Fer $\alpha$ lphaketog malate           |
| 2416 | control    | HSO3                 | NA | HSO3 + cor $\alpha$ lphaketog malate           |
| 2417 | FeCl2      | DMSO                 | NA | DMSO + Fe $\alpha$ lphaketog malate            |
| 2418 | FeCl3      | DMSO                 | NA | DMSO + Fe $\alpha$ lphaketog malate            |
| 2419 | Fe(ClO4)2  | DMSO                 | NA | DMSO + Fe $\alpha$ lphaketog malate            |
| 2420 | Fe(ClO4)3  | DMSO                 | NA | DMSO + Fe $\alpha$ lphaketog malate            |
| 2421 | Fe Sulfide | DMSO                 | NA | DMSO + Fe $\alpha$ lphaketog malate            |
| 2422 | Fe Acetate | DMSO                 | NA | DMSO + Fe $\alpha$ lphaketog malate            |
| 2423 | Ferrocene  | DMSO                 | NA | DMSO + Fe $\alpha$ lphaketog malate            |
| 2424 | control    | DMSO                 | NA | DMSO + co $\alpha$ lphaketog malate            |
| 2425 | FeCl2      | Cys                  | NA | Cys + FeCl2 $\alpha$ lphaketog malate          |
| 2426 | FeCl3      | Cys                  | NA | Cys + FeCl3 $\alpha$ lphaketog malate          |
| 2427 | Fe(ClO4)2  | Cys                  | NA | Cys + Fe(Cl $\alpha$ lphaketog malate          |
| 2428 | Fe(ClO4)3  | Cys                  | NA | Cys + Fe(Cl $\alpha$ lphaketog malate          |
| 2429 | Fe Sulfide | Cys                  | NA | Cys + Fe S $\alpha$ lphaketog malate           |
| 2430 | Fe Acetate | Cys                  | NA | Cys + Fe Ac $\alpha$ lphaketog malate          |
| 2431 | Ferrocene  | Cys                  | NA | Cys + Ferro $\alpha$ lphaketog malate          |
| 2432 | control    | Cys                  | NA | Cys + contr $\alpha$ lphaketog malate          |
| 2433 | FeCl2      | Methionin $\epsilon$ | NA | Methionin $\epsilon$ $\alpha$ lphaketog malate |
| 2434 | FeCl3      | Methionin $\epsilon$ | NA | Methionin $\epsilon$ $\alpha$ lphaketog malate |
| 2435 | Fe(ClO4)2  | Methionin $\epsilon$ | NA | Methionin $\epsilon$ $\alpha$ lphaketog malate |
| 2436 | Fe(ClO4)3  | Methionin $\epsilon$ | NA | Methionin $\epsilon$ $\alpha$ lphaketog malate |
| 2437 | Fe Sulfide | Methionin $\epsilon$ | NA | Methionin $\epsilon$ $\alpha$ lphaketog malate |
| 2438 | Fe Acetate | Methionin $\epsilon$ | NA | Methionin $\epsilon$ $\alpha$ lphaketog malate |
| 2439 | Ferrocene  | Methionin $\epsilon$ | NA | Methionin $\epsilon$ $\alpha$ lphaketog malate |
| 2440 | control    | Methionin $\epsilon$ | NA | Methionin $\epsilon$ $\alpha$ lphaketog malate |
| 2441 | FeCl2      | Homocyste            | NA | Homocyste $\alpha$ lphaketog malate            |
| 2442 | FeCl3      | Homocyste            | NA | Homocyste $\alpha$ lphaketog malate            |
| 2443 | Fe(ClO4)2  | Homocyste            | NA | Homocyste $\alpha$ lphaketog malate            |

|      |            |             |    |                                |
|------|------------|-------------|----|--------------------------------|
| 2444 | Fe(ClO4)3  | Homocyste   | NA | Homocyste alphaketog malate    |
| 2445 | Fe Sulfide | Homocyste   | NA | Homocyste alphaketog malate    |
| 2446 | Fe Acetate | Homocyste   | NA | Homocyste alphaketog malate    |
| 2447 | Ferrocene  | Homocyste   | NA | Homocyste alphaketog malate    |
| 2448 | control    | Homocyste   | NA | Homocyste alphaketog malate    |
| 2449 | FeCl2      | DL-Ethionir | NA | DL-Ethionir alphaketog malate  |
| 2450 | FeCl3      | DL-Ethionir | NA | DL-Ethionir alphaketog malate  |
| 2451 | Fe(ClO4)2  | DL-Ethionir | NA | DL-Ethionir alphaketog malate  |
| 2452 | Fe(ClO4)3  | DL-Ethionir | NA | DL-Ethionir alphaketog malate  |
| 2453 | Fe Sulfide | DL-Ethionir | NA | DL-Ethionir alphaketog malate  |
| 2454 | Fe Acetate | DL-Ethionir | NA | DL-Ethionir alphaketog malate  |
| 2455 | Ferrocene  | DL-Ethionir | NA | DL-Ethionir alphaketog malate  |
| 2456 | control    | DL-Ethionir | NA | DL-Ethionir alphaketog malate  |
| 2457 | FeCl2      | 2-Mercapt   | NA | 2-Mercapt alphaketog malate    |
| 2458 | FeCl3      | 2-Mercapt   | NA | 2-Mercapt alphaketog malate    |
| 2459 | Fe(ClO4)2  | 2-Mercapt   | NA | 2-Mercapt alphaketog malate    |
| 2460 | Fe(ClO4)3  | 2-Mercapt   | NA | 2-Mercapt alphaketog malate    |
| 2461 | Fe Sulfide | 2-Mercapt   | NA | 2-Mercapt alphaketog malate    |
| 2462 | Fe Acetate | 2-Mercapt   | NA | 2-Mercapt alphaketog malate    |
| 2463 | Ferrocene  | 2-Mercapt   | NA | 2-Mercapt alphaketog malate    |
| 2464 | control    | 2-Mercapt   | NA | 2-Mercapt alphaketog malate    |
| 2465 | FeCl2      | S2O8        | NA | S2O8 + FeC cisaconitat malate  |
| 2466 | FeCl3      | S2O8        | NA | S2O8 + FeC cisaconitat malate  |
| 2467 | Fe(ClO4)2  | S2O8        | NA | S2O8 + Fe( cisaconitat malate  |
| 2468 | Fe(ClO4)3  | S2O8        | NA | S2O8 + Fe( cisaconitat malate  |
| 2469 | Fe Sulfide | S2O8        | NA | S2O8 + Fe ' cisaconitat malate |
| 2470 | Fe Acetate | S2O8        | NA | S2O8 + Fe , cisaconitat malate |
| 2471 | Ferrocene  | S2O8        | NA | S2O8 + Fer cisaconitat malate  |
| 2472 | control    | S2O8        | NA | S2O8 + con cisaconitat malate  |
| 2473 | FeCl2      | control     | NA | control + F cisaconitat malate |
| 2474 | FeCl3      | control     | NA | control + F cisaconitat malate |
| 2475 | Fe(ClO4)2  | control     | NA | control + F cisaconitat malate |
| 2476 | Fe(ClO4)3  | control     | NA | control + F cisaconitat malate |
| 2477 | Fe Sulfide | control     | NA | control + F cisaconitat malate |
| 2478 | Fe Acetate | control     | NA | control + F cisaconitat malate |
| 2479 | Ferrocene  | control     | NA | control + F cisaconitat malate |
| 2480 | control    | control     | NA | control + c cisaconitat malate |
| 2481 | FeCl2      | SO4         | NA | SO4 + FeCl: cisaconitat malate |
| 2482 | FeCl3      | SO4         | NA | SO4 + FeCl: cisaconitat malate |
| 2483 | Fe(ClO4)2  | SO4         | NA | SO4 + Fe(C cisaconitat malate  |
| 2484 | Fe(ClO4)3  | SO4         | NA | SO4 + Fe(C cisaconitat malate  |
| 2485 | Fe Sulfide | SO4         | NA | SO4 + Fe S cisaconitat malate  |
| 2486 | Fe Acetate | SO4         | NA | SO4 + Fe A cisaconitat malate  |
| 2487 | Ferrocene  | SO4         | NA | SO4 + Ferr cisaconitat malate  |
| 2488 | control    | SO4         | NA | SO4 + cont cisaconitat malate  |
| 2489 | FeCl2      | SO3         | NA | SO3 + FeCl: cisaconitat malate |
| 2490 | FeCl3      | SO3         | NA | SO3 + FeCl: cisaconitat malate |

|      |            |             |    |             |             |        |
|------|------------|-------------|----|-------------|-------------|--------|
| 2491 | Fe(ClO4)2  | SO3         | NA | SO3 + Fe(C  | cisaconitat | malate |
| 2492 | Fe(ClO4)3  | SO3         | NA | SO3 + Fe(C  | cisaconitat | malate |
| 2493 | Fe Sulfide | SO3         | NA | SO3 + Fe S  | cisaconitat | malate |
| 2494 | Fe Acetate | SO3         | NA | SO3 + Fe A  | cisaconitat | malate |
| 2495 | Ferrocene  | SO3         | NA | SO3 + Ferr  | cisaconitat | malate |
| 2496 | control    | SO3         | NA | SO3 + cont  | cisaconitat | malate |
| 2497 | FeCl2      | HSO3        | NA | HSO3 + Fe(C | cisaconitat | malate |
| 2498 | FeCl3      | HSO3        | NA | HSO3 + Fe(C | cisaconitat | malate |
| 2499 | Fe(ClO4)2  | HSO3        | NA | HSO3 + Fe(  | cisaconitat | malate |
| 2500 | Fe(ClO4)3  | HSO3        | NA | HSO3 + Fe(  | cisaconitat | malate |
| 2501 | Fe Sulfide | HSO3        | NA | HSO3 + Fe   | cisaconitat | malate |
| 2502 | Fe Acetate | HSO3        | NA | HSO3 + Fe   | cisaconitat | malate |
| 2503 | Ferrocene  | HSO3        | NA | HSO3 + Fer  | cisaconitat | malate |
| 2504 | control    | HSO3        | NA | HSO3 + cor  | cisaconitat | malate |
| 2505 | FeCl2      | DMSO        | NA | DMSO + Fe   | cisaconitat | malate |
| 2506 | FeCl3      | DMSO        | NA | DMSO + Fe   | cisaconitat | malate |
| 2507 | Fe(ClO4)2  | DMSO        | NA | DMSO + Fe   | cisaconitat | malate |
| 2508 | Fe(ClO4)3  | DMSO        | NA | DMSO + Fe   | cisaconitat | malate |
| 2509 | Fe Sulfide | DMSO        | NA | DMSO + Fe   | cisaconitat | malate |
| 2510 | Fe Acetate | DMSO        | NA | DMSO + Fe   | cisaconitat | malate |
| 2511 | Ferrocene  | DMSO        | NA | DMSO + Fe   | cisaconitat | malate |
| 2512 | control    | DMSO        | NA | DMSO + co   | cisaconitat | malate |
| 2513 | FeCl2      | Cys         | NA | Cys + FeCl2 | cisaconitat | malate |
| 2514 | FeCl3      | Cys         | NA | Cys + FeCl3 | cisaconitat | malate |
| 2515 | Fe(ClO4)2  | Cys         | NA | Cys + Fe(Cl | cisaconitat | malate |
| 2516 | Fe(ClO4)3  | Cys         | NA | Cys + Fe(Cl | cisaconitat | malate |
| 2517 | Fe Sulfide | Cys         | NA | Cys + Fe Su | cisaconitat | malate |
| 2518 | Fe Acetate | Cys         | NA | Cys + Fe Ac | cisaconitat | malate |
| 2519 | Ferrocene  | Cys         | NA | Cys + Ferro | cisaconitat | malate |
| 2520 | control    | Cys         | NA | Cys + contr | cisaconitat | malate |
| 2521 | FeCl2      | Methionin   | NA | Methionin   | cisaconitat | malate |
| 2522 | FeCl3      | Methionin   | NA | Methionin   | cisaconitat | malate |
| 2523 | Fe(ClO4)2  | Methionin   | NA | Methionin   | cisaconitat | malate |
| 2524 | Fe(ClO4)3  | Methionin   | NA | Methionin   | cisaconitat | malate |
| 2525 | Fe Sulfide | Methionin   | NA | Methionin   | cisaconitat | malate |
| 2526 | Fe Acetate | Methionin   | NA | Methionin   | cisaconitat | malate |
| 2527 | Ferrocene  | Methionin   | NA | Methionin   | cisaconitat | malate |
| 2528 | control    | Methionin   | NA | Methionin   | cisaconitat | malate |
| 2529 | FeCl2      | Homocyste   | NA | Homocyste   | cisaconitat | malate |
| 2530 | FeCl3      | Homocyste   | NA | Homocyste   | cisaconitat | malate |
| 2531 | Fe(ClO4)2  | Homocyste   | NA | Homocyste   | cisaconitat | malate |
| 2532 | Fe(ClO4)3  | Homocyste   | NA | Homocyste   | cisaconitat | malate |
| 2533 | Fe Sulfide | Homocyste   | NA | Homocyste   | cisaconitat | malate |
| 2534 | Fe Acetate | Homocyste   | NA | Homocyste   | cisaconitat | malate |
| 2535 | Ferrocene  | Homocyste   | NA | Homocyste   | cisaconitat | malate |
| 2536 | control    | Homocyste   | NA | Homocyste   | cisaconitat | malate |
| 2537 | FeCl2      | DL-Ethionir | NA | DL-Ethionir | cisaconitat | malate |

|      |                                    |                               |    |                                      |             |        |
|------|------------------------------------|-------------------------------|----|--------------------------------------|-------------|--------|
| 2538 | FeCl <sub>3</sub>                  | DL-Ethionir                   | NA | DL-Ethionir                          | cisaconitat | malate |
| 2539 | Fe(ClO <sub>4</sub> ) <sub>2</sub> | DL-Ethionir                   | NA | DL-Ethionir                          | cisaconitat | malate |
| 2540 | Fe(ClO <sub>4</sub> ) <sub>3</sub> | DL-Ethionir                   | NA | DL-Ethionir                          | cisaconitat | malate |
| 2541 | Fe Sulfide                         | DL-Ethionir                   | NA | DL-Ethionir                          | cisaconitat | malate |
| 2542 | Fe Acetate                         | DL-Ethionir                   | NA | DL-Ethionir                          | cisaconitat | malate |
| 2543 | Ferrocene                          | DL-Ethionir                   | NA | DL-Ethionir                          | cisaconitat | malate |
| 2544 | control                            | DL-Ethionir                   | NA | DL-Ethionir                          | cisaconitat | malate |
| 2545 | FeCl <sub>2</sub>                  | 2-Mercapt                     | NA | 2-Mercapt                            | cisaconitat | malate |
| 2546 | FeCl <sub>3</sub>                  | 2-Mercapt                     | NA | 2-Mercapt                            | cisaconitat | malate |
| 2547 | Fe(ClO <sub>4</sub> ) <sub>2</sub> | 2-Mercapt                     | NA | 2-Mercapt                            | cisaconitat | malate |
| 2548 | Fe(ClO <sub>4</sub> ) <sub>3</sub> | 2-Mercapt                     | NA | 2-Mercapt                            | cisaconitat | malate |
| 2549 | Fe Sulfide                         | 2-Mercapt                     | NA | 2-Mercapt                            | cisaconitat | malate |
| 2550 | Fe Acetate                         | 2-Mercapt                     | NA | 2-Mercapt                            | cisaconitat | malate |
| 2551 | Ferrocene                          | 2-Mercapt                     | NA | 2-Mercapt                            | cisaconitat | malate |
| 2552 | control                            | 2-Mercapt                     | NA | 2-Mercapt                            | cisaconitat | malate |
| 2553 | FeCl <sub>2</sub>                  | S <sub>2</sub> O <sub>8</sub> | NA | S <sub>2</sub> O <sub>8</sub> + FeC  | citrate     | malate |
| 2554 | FeCl <sub>3</sub>                  | S <sub>2</sub> O <sub>8</sub> | NA | S <sub>2</sub> O <sub>8</sub> + FeC  | citrate     | malate |
| 2555 | Fe(ClO <sub>4</sub> ) <sub>2</sub> | S <sub>2</sub> O <sub>8</sub> | NA | S <sub>2</sub> O <sub>8</sub> + Fe(C | citrate     | malate |
| 2556 | Fe(ClO <sub>4</sub> ) <sub>3</sub> | S <sub>2</sub> O <sub>8</sub> | NA | S <sub>2</sub> O <sub>8</sub> + Fe(C | citrate     | malate |
| 2557 | Fe Sulfide                         | S <sub>2</sub> O <sub>8</sub> | NA | S <sub>2</sub> O <sub>8</sub> + Fe S | citrate     | malate |
| 2558 | Fe Acetate                         | S <sub>2</sub> O <sub>8</sub> | NA | S <sub>2</sub> O <sub>8</sub> + Fe A | citrate     | malate |
| 2559 | Ferrocene                          | S <sub>2</sub> O <sub>8</sub> | NA | S <sub>2</sub> O <sub>8</sub> + Ferr | citrate     | malate |
| 2560 | control                            | S <sub>2</sub> O <sub>8</sub> | NA | S <sub>2</sub> O <sub>8</sub> + con  | citrate     | malate |
| 2561 | FeCl <sub>2</sub>                  | control                       | NA | control + F                          | citrate     | malate |
| 2562 | FeCl <sub>3</sub>                  | control                       | NA | control + F                          | citrate     | malate |
| 2563 | Fe(ClO <sub>4</sub> ) <sub>2</sub> | control                       | NA | control + F                          | citrate     | malate |
| 2564 | Fe(ClO <sub>4</sub> ) <sub>3</sub> | control                       | NA | control + F                          | citrate     | malate |
| 2565 | Fe Sulfide                         | control                       | NA | control + F                          | citrate     | malate |
| 2566 | Fe Acetate                         | control                       | NA | control + F                          | citrate     | malate |
| 2567 | Ferrocene                          | control                       | NA | control + F                          | citrate     | malate |
| 2568 | control                            | control                       | NA | control + c                          | citrate     | malate |
| 2569 | FeCl <sub>2</sub>                  | SO <sub>4</sub>               | NA | SO <sub>4</sub> + FeCl               | citrate     | malate |
| 2570 | FeCl <sub>3</sub>                  | SO <sub>4</sub>               | NA | SO <sub>4</sub> + FeCl               | citrate     | malate |
| 2571 | Fe(ClO <sub>4</sub> ) <sub>2</sub> | SO <sub>4</sub>               | NA | SO <sub>4</sub> + Fe(C               | citrate     | malate |
| 2572 | Fe(ClO <sub>4</sub> ) <sub>3</sub> | SO <sub>4</sub>               | NA | SO <sub>4</sub> + Fe(C               | citrate     | malate |
| 2573 | Fe Sulfide                         | SO <sub>4</sub>               | NA | SO <sub>4</sub> + Fe S               | citrate     | malate |
| 2574 | Fe Acetate                         | SO <sub>4</sub>               | NA | SO <sub>4</sub> + Fe A               | citrate     | malate |
| 2575 | Ferrocene                          | SO <sub>4</sub>               | NA | SO <sub>4</sub> + Ferr               | citrate     | malate |
| 2576 | control                            | SO <sub>4</sub>               | NA | SO <sub>4</sub> + cont               | citrate     | malate |
| 2577 | FeCl <sub>2</sub>                  | SO <sub>3</sub>               | NA | SO <sub>3</sub> + FeCl               | citrate     | malate |
| 2578 | FeCl <sub>3</sub>                  | SO <sub>3</sub>               | NA | SO <sub>3</sub> + FeCl               | citrate     | malate |
| 2579 | Fe(ClO <sub>4</sub> ) <sub>2</sub> | SO <sub>3</sub>               | NA | SO <sub>3</sub> + Fe(C               | citrate     | malate |
| 2580 | Fe(ClO <sub>4</sub> ) <sub>3</sub> | SO <sub>3</sub>               | NA | SO <sub>3</sub> + Fe(C               | citrate     | malate |
| 2581 | Fe Sulfide                         | SO <sub>3</sub>               | NA | SO <sub>3</sub> + Fe S               | citrate     | malate |
| 2582 | Fe Acetate                         | SO <sub>3</sub>               | NA | SO <sub>3</sub> + Fe A               | citrate     | malate |
| 2583 | Ferrocene                          | SO <sub>3</sub>               | NA | SO <sub>3</sub> + Ferr               | citrate     | malate |
| 2584 | control                            | SO <sub>3</sub>               | NA | SO <sub>3</sub> + cont               | citrate     | malate |

|      |            |             |    |                     |        |
|------|------------|-------------|----|---------------------|--------|
| 2585 | FeCl2      | HSO3        | NA | HSO3 + Fe( citrate  | malate |
| 2586 | FeCl3      | HSO3        | NA | HSO3 + Fe( citrate  | malate |
| 2587 | Fe(ClO4)2  | HSO3        | NA | HSO3 + Fe( citrate  | malate |
| 2588 | Fe(ClO4)3  | HSO3        | NA | HSO3 + Fe( citrate  | malate |
| 2589 | Fe Sulfide | HSO3        | NA | HSO3 + Fe . citrate | malate |
| 2590 | Fe Acetate | HSO3        | NA | HSO3 + Fe . citrate | malate |
| 2591 | Ferrocene  | HSO3        | NA | HSO3 + Fer citrate  | malate |
| 2592 | control    | HSO3        | NA | HSO3 + cor citrate  | malate |
| 2593 | FeCl2      | DMSO        | NA | DMSO + Fe citrate   | malate |
| 2594 | FeCl3      | DMSO        | NA | DMSO + Fe citrate   | malate |
| 2595 | Fe(ClO4)2  | DMSO        | NA | DMSO + Fe citrate   | malate |
| 2596 | Fe(ClO4)3  | DMSO        | NA | DMSO + Fe citrate   | malate |
| 2597 | Fe Sulfide | DMSO        | NA | DMSO + Fe citrate   | malate |
| 2598 | Fe Acetate | DMSO        | NA | DMSO + Fe citrate   | malate |
| 2599 | Ferrocene  | DMSO        | NA | DMSO + Fe citrate   | malate |
| 2600 | control    | DMSO        | NA | DMSO + co citrate   | malate |
| 2601 | FeCl2      | Cys         | NA | Cys + FeCl2 citrate | malate |
| 2602 | FeCl3      | Cys         | NA | Cys + FeCl3 citrate | malate |
| 2603 | Fe(ClO4)2  | Cys         | NA | Cys + Fe(Cl citrate | malate |
| 2604 | Fe(ClO4)3  | Cys         | NA | Cys + Fe(Cl citrate | malate |
| 2605 | Fe Sulfide | Cys         | NA | Cys + Fe Su citrate | malate |
| 2606 | Fe Acetate | Cys         | NA | Cys + Fe Ac citrate | malate |
| 2607 | Ferrocene  | Cys         | NA | Cys + Ferro citrate | malate |
| 2608 | control    | Cys         | NA | Cys + contr citrate | malate |
| 2609 | FeCl2      | Methionin   | NA | Methionin citrate   | malate |
| 2610 | FeCl3      | Methionin   | NA | Methionin citrate   | malate |
| 2611 | Fe(ClO4)2  | Methionin   | NA | Methionin citrate   | malate |
| 2612 | Fe(ClO4)3  | Methionin   | NA | Methionin citrate   | malate |
| 2613 | Fe Sulfide | Methionin   | NA | Methionin citrate   | malate |
| 2614 | Fe Acetate | Methionin   | NA | Methionin citrate   | malate |
| 2615 | Ferrocene  | Methionin   | NA | Methionin citrate   | malate |
| 2616 | control    | Methionin   | NA | Methionin citrate   | malate |
| 2617 | FeCl2      | Homocyste   | NA | Homocyste citrate   | malate |
| 2618 | FeCl3      | Homocyste   | NA | Homocyste citrate   | malate |
| 2619 | Fe(ClO4)2  | Homocyste   | NA | Homocyste citrate   | malate |
| 2620 | Fe(ClO4)3  | Homocyste   | NA | Homocyste citrate   | malate |
| 2621 | Fe Sulfide | Homocyste   | NA | Homocyste citrate   | malate |
| 2622 | Fe Acetate | Homocyste   | NA | Homocyste citrate   | malate |
| 2623 | Ferrocene  | Homocyste   | NA | Homocyste citrate   | malate |
| 2624 | control    | Homocyste   | NA | Homocyste citrate   | malate |
| 2625 | FeCl2      | DL-Ethionir | NA | DL-Ethionir citrate | malate |
| 2626 | FeCl3      | DL-Ethionir | NA | DL-Ethionir citrate | malate |
| 2627 | Fe(ClO4)2  | DL-Ethionir | NA | DL-Ethionir citrate | malate |
| 2628 | Fe(ClO4)3  | DL-Ethionir | NA | DL-Ethionir citrate | malate |
| 2629 | Fe Sulfide | DL-Ethionir | NA | DL-Ethionir citrate | malate |
| 2630 | Fe Acetate | DL-Ethionir | NA | DL-Ethionir citrate | malate |
| 2631 | Ferrocene  | DL-Ethionir | NA | DL-Ethionir citrate | malate |



|      |                                    |                               |    |                                               |        |
|------|------------------------------------|-------------------------------|----|-----------------------------------------------|--------|
| 2632 | control                            | DL-Ethionir                   | NA | DL-Ethionir citrate                           | malate |
| 2633 | FeCl <sub>2</sub>                  | 2-Mercapt                     | NA | 2-Mercapt citrate                             | malate |
| 2634 | FeCl <sub>3</sub>                  | 2-Mercapt                     | NA | 2-Mercapt citrate                             | malate |
| 2635 | Fe(ClO <sub>4</sub> ) <sub>2</sub> | 2-Mercapt                     | NA | 2-Mercapt citrate                             | malate |
| 2636 | Fe(ClO <sub>4</sub> ) <sub>3</sub> | 2-Mercapt                     | NA | 2-Mercapt citrate                             | malate |
| 2637 | Fe Sulfide                         | 2-Mercapt                     | NA | 2-Mercapt citrate                             | malate |
| 2638 | Fe Acetate                         | 2-Mercapt                     | NA | 2-Mercapt citrate                             | malate |
| 2639 | Ferrocene                          | 2-Mercapt                     | NA | 2-Mercapt citrate                             | malate |
| 2640 | control                            | 2-Mercapt                     | NA | 2-Mercapt citrate                             | malate |
| 2641 | FeCl <sub>2</sub>                  | S <sub>2</sub> O <sub>8</sub> | NA | S <sub>2</sub> O <sub>8</sub> + FeC fumarate  | malate |
| 2642 | FeCl <sub>3</sub>                  | S <sub>2</sub> O <sub>8</sub> | NA | S <sub>2</sub> O <sub>8</sub> + FeC fumarate  | malate |
| 2643 | Fe(ClO <sub>4</sub> ) <sub>2</sub> | S <sub>2</sub> O <sub>8</sub> | NA | S <sub>2</sub> O <sub>8</sub> + Fe( fumarate  | malate |
| 2644 | Fe(ClO <sub>4</sub> ) <sub>3</sub> | S <sub>2</sub> O <sub>8</sub> | NA | S <sub>2</sub> O <sub>8</sub> + Fe( fumarate  | malate |
| 2645 | Fe Sulfide                         | S <sub>2</sub> O <sub>8</sub> | NA | S <sub>2</sub> O <sub>8</sub> + Fe ! fumarate | malate |
| 2646 | Fe Acetate                         | S <sub>2</sub> O <sub>8</sub> | NA | S <sub>2</sub> O <sub>8</sub> + Fe / fumarate | malate |
| 2647 | Ferrocene                          | S <sub>2</sub> O <sub>8</sub> | NA | S <sub>2</sub> O <sub>8</sub> + Fer fumarate  | malate |
| 2648 | control                            | S <sub>2</sub> O <sub>8</sub> | NA | S <sub>2</sub> O <sub>8</sub> + con fumarate  | malate |
| 2649 | FeCl <sub>2</sub>                  | control                       | NA | control + Fi fumarate                         | malate |
| 2650 | FeCl <sub>3</sub>                  | control                       | NA | control + Fi fumarate                         | malate |
| 2651 | Fe(ClO <sub>4</sub> ) <sub>2</sub> | control                       | NA | control + Fi fumarate                         | malate |
| 2652 | Fe(ClO <sub>4</sub> ) <sub>3</sub> | control                       | NA | control + Fi fumarate                         | malate |
| 2653 | Fe Sulfide                         | control                       | NA | control + Fi fumarate                         | malate |
| 2654 | Fe Acetate                         | control                       | NA | control + Fi fumarate                         | malate |
| 2655 | Ferrocene                          | control                       | NA | control + Fi fumarate                         | malate |
| 2656 | control                            | control                       | NA | control + ci fumarate                         | malate |
| 2657 | FeCl <sub>2</sub>                  | SO <sub>4</sub>               | NA | SO <sub>4</sub> + FeCl: fumarate              | malate |
| 2658 | FeCl <sub>3</sub>                  | SO <sub>4</sub>               | NA | SO <sub>4</sub> + FeCl: fumarate              | malate |
| 2659 | Fe(ClO <sub>4</sub> ) <sub>2</sub> | SO <sub>4</sub>               | NA | SO <sub>4</sub> + Fe(C fumarate               | malate |
| 2660 | Fe(ClO <sub>4</sub> ) <sub>3</sub> | SO <sub>4</sub>               | NA | SO <sub>4</sub> + Fe(C fumarate               | malate |
| 2661 | Fe Sulfide                         | SO <sub>4</sub>               | NA | SO <sub>4</sub> + Fe Si fumarate              | malate |
| 2662 | Fe Acetate                         | SO <sub>4</sub>               | NA | SO <sub>4</sub> + Fe Ai fumarate              | malate |
| 2663 | Ferrocene                          | SO <sub>4</sub>               | NA | SO <sub>4</sub> + Ferr fumarate               | malate |
| 2664 | control                            | SO <sub>4</sub>               | NA | SO <sub>4</sub> + cont fumarate               | malate |
| 2665 | FeCl <sub>2</sub>                  | SO <sub>3</sub>               | NA | SO <sub>3</sub> + FeCl: fumarate              | malate |
| 2666 | FeCl <sub>3</sub>                  | SO <sub>3</sub>               | NA | SO <sub>3</sub> + FeCl: fumarate              | malate |
| 2667 | Fe(ClO <sub>4</sub> ) <sub>2</sub> | SO <sub>3</sub>               | NA | SO <sub>3</sub> + Fe(C fumarate               | malate |
| 2668 | Fe(ClO <sub>4</sub> ) <sub>3</sub> | SO <sub>3</sub>               | NA | SO <sub>3</sub> + Fe(C fumarate               | malate |
| 2669 | Fe Sulfide                         | SO <sub>3</sub>               | NA | SO <sub>3</sub> + Fe Si fumarate              | malate |
| 2670 | Fe Acetate                         | SO <sub>3</sub>               | NA | SO <sub>3</sub> + Fe Ai fumarate              | malate |
| 2671 | Ferrocene                          | SO <sub>3</sub>               | NA | SO <sub>3</sub> + Ferr fumarate               | malate |
| 2672 | control                            | SO <sub>3</sub>               | NA | SO <sub>3</sub> + cont fumarate               | malate |
| 2673 | FeCl <sub>2</sub>                  | HSO <sub>3</sub>              | NA | HSO <sub>3</sub> + FeC fumarate               | malate |
| 2674 | FeCl <sub>3</sub>                  | HSO <sub>3</sub>              | NA | HSO <sub>3</sub> + FeC fumarate               | malate |
| 2675 | Fe(ClO <sub>4</sub> ) <sub>2</sub> | HSO <sub>3</sub>              | NA | HSO <sub>3</sub> + Fe( fumarate               | malate |
| 2676 | Fe(ClO <sub>4</sub> ) <sub>3</sub> | HSO <sub>3</sub>              | NA | HSO <sub>3</sub> + Fe( fumarate               | malate |
| 2677 | Fe Sulfide                         | HSO <sub>3</sub>              | NA | HSO <sub>3</sub> + Fe ! fumarate              | malate |
| 2678 | Fe Acetate                         | HSO <sub>3</sub>              | NA | HSO <sub>3</sub> + Fe / fumarate              | malate |

|      |            |             |    |                      |        |
|------|------------|-------------|----|----------------------|--------|
| 2679 | Ferrocene  | HSO3        | NA | HSO3 + Fer fumarate  | malate |
| 2680 | control    | HSO3        | NA | HSO3 + cor fumarate  | malate |
| 2681 | FeCl2      | DMSO        | NA | DMSO + Fe fumarate   | malate |
| 2682 | FeCl3      | DMSO        | NA | DMSO + Fe fumarate   | malate |
| 2683 | Fe(ClO4)2  | DMSO        | NA | DMSO + Fe fumarate   | malate |
| 2684 | Fe(ClO4)3  | DMSO        | NA | DMSO + Fe fumarate   | malate |
| 2685 | Fe Sulfide | DMSO        | NA | DMSO + Fe fumarate   | malate |
| 2686 | Fe Acetate | DMSO        | NA | DMSO + Fe fumarate   | malate |
| 2687 | Ferrocene  | DMSO        | NA | DMSO + Fe fumarate   | malate |
| 2688 | control    | DMSO        | NA | DMSO + co fumarate   | malate |
| 2689 | FeCl2      | Cys         | NA | Cys + FeCl2 fumarate | malate |
| 2690 | FeCl3      | Cys         | NA | Cys + FeCl3 fumarate | malate |
| 2691 | Fe(ClO4)2  | Cys         | NA | Cys + Fe(Cl fumarate | malate |
| 2692 | Fe(ClO4)3  | Cys         | NA | Cys + Fe(Cl fumarate | malate |
| 2693 | Fe Sulfide | Cys         | NA | Cys + Fe Su fumarate | malate |
| 2694 | Fe Acetate | Cys         | NA | Cys + Fe Ac fumarate | malate |
| 2695 | Ferrocene  | Cys         | NA | Cys + Ferro fumarate | malate |
| 2696 | control    | Cys         | NA | Cys + contr fumarate | malate |
| 2697 | FeCl2      | Methionin   | NA | Methionin fumarate   | malate |
| 2698 | FeCl3      | Methionin   | NA | Methionin fumarate   | malate |
| 2699 | Fe(ClO4)2  | Methionin   | NA | Methionin fumarate   | malate |
| 2700 | Fe(ClO4)3  | Methionin   | NA | Methionin fumarate   | malate |
| 2701 | Fe Sulfide | Methionin   | NA | Methionin fumarate   | malate |
| 2702 | Fe Acetate | Methionin   | NA | Methionin fumarate   | malate |
| 2703 | Ferrocene  | Methionin   | NA | Methionin fumarate   | malate |
| 2704 | control    | Methionin   | NA | Methionin fumarate   | malate |
| 2705 | FeCl2      | Homocyste   | NA | Homocyste fumarate   | malate |
| 2706 | FeCl3      | Homocyste   | NA | Homocyste fumarate   | malate |
| 2707 | Fe(ClO4)2  | Homocyste   | NA | Homocyste fumarate   | malate |
| 2708 | Fe(ClO4)3  | Homocyste   | NA | Homocyste fumarate   | malate |
| 2709 | Fe Sulfide | Homocyste   | NA | Homocyste fumarate   | malate |
| 2710 | Fe Acetate | Homocyste   | NA | Homocyste fumarate   | malate |
| 2711 | Ferrocene  | Homocyste   | NA | Homocyste fumarate   | malate |
| 2712 | control    | Homocyste   | NA | Homocyste fumarate   | malate |
| 2713 | FeCl2      | DL-Ethionir | NA | DL-Ethionir fumarate | malate |
| 2714 | FeCl3      | DL-Ethionir | NA | DL-Ethionir fumarate | malate |
| 2715 | Fe(ClO4)2  | DL-Ethionir | NA | DL-Ethionir fumarate | malate |
| 2716 | Fe(ClO4)3  | DL-Ethionir | NA | DL-Ethionir fumarate | malate |
| 2717 | Fe Sulfide | DL-Ethionir | NA | DL-Ethionir fumarate | malate |
| 2718 | Fe Acetate | DL-Ethionir | NA | DL-Ethionir fumarate | malate |
| 2719 | Ferrocene  | DL-Ethionir | NA | DL-Ethionir fumarate | malate |
| 2720 | control    | DL-Ethionir | NA | DL-Ethionir fumarate | malate |
| 2721 | FeCl2      | 2-Mercapt   | NA | 2-Mercapt fumarate   | malate |
| 2722 | FeCl3      | 2-Mercapt   | NA | 2-Mercapt fumarate   | malate |
| 2723 | Fe(ClO4)2  | 2-Mercapt   | NA | 2-Mercapt fumarate   | malate |
| 2724 | Fe(ClO4)3  | 2-Mercapt   | NA | 2-Mercapt fumarate   | malate |
| 2725 | Fe Sulfide | 2-Mercapt   | NA | 2-Mercapt fumarate   | malate |

|      |            |              |                      |        |
|------|------------|--------------|----------------------|--------|
| 2726 | Fe Acetate | 2-Mercapt(NA | 2-Mercapt(fumarate   | malate |
| 2727 | Ferrocene  | 2-Mercapt(NA | 2-Mercapt(fumarate   | malate |
| 2728 | control    | 2-Mercapt(NA | 2-Mercapt(fumarate   | malate |
| 2729 | FeCl2      | S2O8         | 0.287875 S2O8 + FeC  | malate |
| 2730 | FeCl3      | S2O8         | 0.04543 S2O8 + FeC   | malate |
| 2731 | Fe(ClO4)2  | S2O8         | 0.073579 S2O8 + Fe(  | malate |
| 2732 | Fe(ClO4)3  | S2O8         | -0.06793 S2O8 + Fe(  | malate |
| 2733 | Fe Sulfide | S2O8         | -5.23163 S2O8 + Fe   | malate |
| 2734 | Fe Acetate | S2O8         | -0.60329 S2O8 + Fe   | malate |
| 2735 | Ferrocene  | S2O8         | -5.21384 S2O8 + Fer  | malate |
| 2736 | control    | S2O8         | -4.21189 S2O8 + con  | malate |
| 2737 | FeCl2      | control      | -1.29638 control + F | malate |
| 2738 | FeCl3      | control      | -0.09351 control + F | malate |
| 2739 | Fe(ClO4)2  | control      | -0.66237 control + F | malate |
| 2740 | Fe(ClO4)3  | control      | 0.278094 control + F | malate |
| 2741 | Fe Sulfide | control      | -0.36034 control + F | malate |
| 2742 | Fe Acetate | control      | -0.11291 control + F | malate |
| 2743 | Ferrocene  | control      | 0.369299 control + F | malate |
| 2744 | control    | control      | 0.933439 control + c | malate |
| 2745 | FeCl2      | SO4          | -1.11646 SO4 + FeCl: | malate |
| 2746 | FeCl3      | SO4          | 0.720919 SO4 + FeCl: | malate |
| 2747 | Fe(ClO4)2  | SO4          | -0.98231 SO4 + Fe(C  | malate |
| 2748 | Fe(ClO4)3  | SO4          | 0.42329 SO4 + Fe(C   | malate |
| 2749 | Fe Sulfide | SO4          | -0.40961 SO4 + Fe S  | malate |
| 2750 | Fe Acetate | SO4          | 0.084499 SO4 + Fe A  | malate |
| 2751 | Ferrocene  | SO4          | -0.23277 SO4 + Ferr  | malate |
| 2752 | control    | SO4          | 0.180687 SO4 + cont  | malate |
| 2753 | FeCl2      | SO3          | -1.49633 SO3 + FeCl: | malate |
| 2754 | FeCl3      | SO3          | 0.475638 SO3 + FeCl: | malate |
| 2755 | Fe(ClO4)2  | SO3          | -1.86314 SO3 + Fe(C  | malate |
| 2756 | Fe(ClO4)3  | SO3          | 1.047438 SO3 + Fe(C  | malate |
| 2757 | Fe Sulfide | SO3          | 0.064037 SO3 + Fe S  | malate |
| 2758 | Fe Acetate | SO3          | -0.00554 SO3 + Fe A  | malate |
| 2759 | Ferrocene  | SO3          | 0.230729 SO3 + Ferr  | malate |
| 2760 | control    | SO3          | 0.954696 SO3 + cont  | malate |
| 2761 | FeCl2      | HSO3         | 0.285304 HSO3 + FeC  | malate |
| 2762 | FeCl3      | HSO3         | -0.23743 HSO3 + FeC  | malate |
| 2763 | Fe(ClO4)2  | HSO3         | 0.095022 HSO3 + Fe(  | malate |
| 2764 | Fe(ClO4)3  | HSO3         | -0.36964 HSO3 + Fe(  | malate |
| 2765 | Fe Sulfide | HSO3         | 0.00554 HSO3 + Fe    | malate |
| 2766 | Fe Acetate | HSO3         | 1.758471 HSO3 + Fe   | malate |
| 2767 | Ferrocene  | HSO3         | -0.01561 HSO3 + Fer  | malate |
| 2768 | control    | HSO3         | 1.167932 HSO3 + cor  | malate |
| 2769 | FeCl2      | DMSO         | -0.86816 DMSO + Fe   | malate |
| 2770 | FeCl3      | DMSO         | 1.089052 DMSO + Fe   | malate |
| 2771 | Fe(ClO4)2  | DMSO         | -1.05613 DMSO + Fe   | malate |
| 2772 | Fe(ClO4)3  | DMSO         | 1.351322 DMSO + Fe   | malate |

|      |                                    |             |          |                                |        |
|------|------------------------------------|-------------|----------|--------------------------------|--------|
| 2773 | Fe Sulfide                         | DMSO        | 0.074056 | DMSO + Fe malate               | malate |
| 2774 | Fe Acetate                         | DMSO        | 0.209339 | DMSO + Fe malate               | malate |
| 2775 | Ferrocene                          | DMSO        | 1.22839  | DMSO + Fe malate               | malate |
| 2776 | control                            | DMSO        | 0.367152 | DMSO + co malate               | malate |
| 2777 | FeCl <sub>2</sub>                  | Cys         | -0.38658 | Cys + FeCl <sub>2</sub> malate | malate |
| 2778 | FeCl <sub>3</sub>                  | Cys         | -0.54174 | Cys + FeCl <sub>3</sub> malate | malate |
| 2779 | Fe(ClO <sub>4</sub> ) <sub>2</sub> | Cys         | -0.17154 | Cys + Fe(Cl malate             | malate |
| 2780 | Fe(ClO <sub>4</sub> ) <sub>3</sub> | Cys         | -0.43874 | Cys + Fe(Cl malate             | malate |
| 2781 | Fe Sulfide                         | Cys         | -0.61386 | Cys + Fe Su malate             | malate |
| 2782 | Fe Acetate                         | Cys         | -0.99888 | Cys + Fe Ac malate             | malate |
| 2783 | Ferrocene                          | Cys         | 1.228337 | Cys + Ferro malate             | malate |
| 2784 | control                            | Cys         | 0.74048  | Cys + contr malate             | malate |
| 2785 | FeCl <sub>2</sub>                  | Methionin   | -0.03917 | Methionin malate               | malate |
| 2786 | FeCl <sub>3</sub>                  | Methionin   | 0.775918 | Methionin malate               | malate |
| 2787 | Fe(ClO <sub>4</sub> ) <sub>2</sub> | Methionin   | -0.21159 | Methionin malate               | malate |
| 2788 | Fe(ClO <sub>4</sub> ) <sub>3</sub> | Methionin   | 1.394499 | Methionin malate               | malate |
| 2789 | Fe Sulfide                         | Methionin   | 0.114609 | Methionin malate               | malate |
| 2790 | Fe Acetate                         | Methionin   | 0.278969 | Methionin malate               | malate |
| 2791 | Ferrocene                          | Methionin   | 0.208968 | Methionin malate               | malate |
| 2792 | control                            | Methionin   | 0.580282 | Methionin malate               | malate |
| 2793 | FeCl <sub>2</sub>                  | Homocyste   | -0.93972 | Homocyste malate               | malate |
| 2794 | FeCl <sub>3</sub>                  | Homocyste   | 0.898558 | Homocyste malate               | malate |
| 2795 | Fe(ClO <sub>4</sub> ) <sub>2</sub> | Homocyste   | -1.09133 | Homocyste malate               | malate |
| 2796 | Fe(ClO <sub>4</sub> ) <sub>3</sub> | Homocyste   | 0.701146 | Homocyste malate               | malate |
| 2797 | Fe Sulfide                         | Homocyste   | -0.42181 | Homocyste malate               | malate |
| 2798 | Fe Acetate                         | Homocyste   | -0.77337 | Homocyste malate               | malate |
| 2799 | Ferrocene                          | Homocyste   | -0.21689 | Homocyste malate               | malate |
| 2800 | control                            | Homocyste   | 0.278598 | Homocyste malate               | malate |
| 2801 | FeCl <sub>2</sub>                  | DL-Ethionir | -0.29106 | DL-Ethionir malate             | malate |
| 2802 | FeCl <sub>3</sub>                  | DL-Ethionir | 1.199208 | DL-Ethionir malate             | malate |
| 2803 | Fe(ClO <sub>4</sub> ) <sub>2</sub> | DL-Ethionir | -0.35114 | DL-Ethionir malate             | malate |
| 2804 | Fe(ClO <sub>4</sub> ) <sub>3</sub> | DL-Ethionir | 1.086454 | DL-Ethionir malate             | malate |
| 2805 | Fe Sulfide                         | DL-Ethionir | -0.1254  | DL-Ethionir malate             | malate |
| 2806 | Fe Acetate                         | DL-Ethionir | 0.170959 | DL-Ethionir malate             | malate |
| 2807 | Ferrocene                          | DL-Ethionir | 0.713312 | DL-Ethionir malate             | malate |
| 2808 | control                            | DL-Ethionir | 0.46273  | DL-Ethionir malate             | malate |
| 2809 | FeCl <sub>2</sub>                  | 2-Mercapt   | -0.13889 | 2-Mercapt malate               | malate |
| 2810 | FeCl <sub>3</sub>                  | 2-Mercapt   | -0.44025 | 2-Mercapt malate               | malate |
| 2811 | Fe(ClO <sub>4</sub> ) <sub>2</sub> | 2-Mercapt   | -0.02995 | 2-Mercapt malate               | malate |
| 2812 | Fe(ClO <sub>4</sub> ) <sub>3</sub> | 2-Mercapt   | -0.74287 | 2-Mercapt malate               | malate |
| 2813 | Fe Sulfide                         | 2-Mercapt   | -0.06247 | 2-Mercapt malate               | malate |
| 2814 | Fe Acetate                         | 2-Mercapt   | -0.22585 | 2-Mercapt malate               | malate |
| 2815 | Ferrocene                          | 2-Mercapt   | 0.555499 | 2-Mercapt malate               | malate |
| 2816 | control                            | 2-Mercapt   | 0.707958 | 2-Mercapt malate               | malate |
| 2817 | FeCl <sub>2</sub>                  | S2O8        | -1.37954 | S2O8 + FeC oxaloaceta          | malate |
| 2818 | FeCl <sub>3</sub>                  | S2O8        | -0.45927 | S2O8 + FeC oxaloaceta          | malate |
| 2819 | Fe(ClO <sub>4</sub> ) <sub>2</sub> | S2O8        | 1.289424 | S2O8 + Fe( oxaloaceta          | malate |

|      |            |         |          |                                |
|------|------------|---------|----------|--------------------------------|
| 2820 | Fe(ClO4)3  | S2O8    | 1.632577 | S2O8 + Fe(oxaloaceta malate    |
| 2821 | Fe Sulfide | S2O8    | 2.228762 | S2O8 + Fe(oxaloaceta malate    |
| 2822 | Fe Acetate | S2O8    | -0.28076 | S2O8 + Fe(oxaloaceta malate    |
| 2823 | Ferrocene  | S2O8    | -0.45061 | S2O8 + Fer(oxaloaceta malate   |
| 2824 | control    | S2O8    | 2.84921  | S2O8 + con(oxaloaceta malate   |
| 2825 | FeCl2      | control | 0.325822 | control + Fe(oxaloaceta malate |
| 2826 | FeCl3      | control | -0.16464 | control + Fe(oxaloaceta malate |
| 2827 | Fe(ClO4)2  | control | 0.729634 | control + Fe(oxaloaceta malate |
| 2828 | Fe(ClO4)3  | control | 0.308491 | control + Fe(oxaloaceta malate |
| 2829 | Fe Sulfide | control | -0.2097  | control + Fe(oxaloaceta malate |
| 2830 | Fe Acetate | control | -0.15078 | control + Fe(oxaloaceta malate |
| 2831 | Ferrocene  | control | 2.256491 | control + Fe(oxaloaceta malate |
| 2832 | control    | control | -1.7331  | control + c(oxaloaceta malate  |
| 2833 | FeCl2      | SO4     | 0.150779 | SO4 + FeCl(oxaloaceta malate   |
| 2834 | FeCl3      | SO4     | -1.42807 | SO4 + FeCl(oxaloaceta malate   |
| 2835 | Fe(ClO4)2  | SO4     | 0.651644 | SO4 + Fe(C(oxaloaceta malate   |
| 2836 | Fe(ClO4)3  | SO4     | -0.14211 | SO4 + Fe(C(oxaloaceta malate   |
| 2837 | Fe Sulfide | SO4     | 1.65684  | SO4 + Fe(S(oxaloaceta malate   |
| 2838 | Fe Acetate | SO4     | -1.0052  | SO4 + Fe(A(oxaloaceta malate   |
| 2839 | Ferrocene  | SO4     | -0.66378 | SO4 + Ferr(oxaloaceta malate   |
| 2840 | control    | SO4     | 0.005199 | SO4 + cont(oxaloaceta malate   |
| 2841 | FeCl2      | SO3     | 0.251299 | SO3 + FeCl(oxaloaceta malate   |
| 2842 | FeCl3      | SO3     | 0.280762 | SO3 + FeCl(oxaloaceta malate   |
| 2843 | Fe(ClO4)2  | SO3     | 0.584053 | SO3 + Fe(C(oxaloaceta malate   |
| 2844 | Fe(ClO4)3  | SO3     | 0.339687 | SO3 + Fe(C(oxaloaceta malate   |
| 2845 | Fe Sulfide | SO3     | -0.81629 | SO3 + Fe(S(oxaloaceta malate   |
| 2846 | Fe Acetate | SO3     | -1.1941  | SO3 + Fe(A(oxaloaceta malate   |
| 2847 | Ferrocene  | SO3     | -0.81975 | SO3 + Ferr(oxaloaceta malate   |
| 2848 | control    | SO3     | 0.07279  | SO3 + cont(oxaloaceta malate   |
| 2849 | FeCl2      | HSO3    | 0.227036 | HSO3 + Fe(C(oxaloaceta malate  |
| 2850 | FeCl3      | HSO3    | 0.795491 | HSO3 + Fe(C(oxaloaceta malate  |
| 2851 | Fe(ClO4)2  | HSO3    | -0.04333 | HSO3 + Fe(oxaloaceta malate    |
| 2852 | Fe(ClO4)3  | HSO3    | 0.097053 | HSO3 + Fe(oxaloaceta malate    |
| 2853 | Fe Sulfide | HSO3    | 1.927203 | HSO3 + Fe(oxaloaceta malate    |
| 2854 | Fe Acetate | HSO3    | -0.73483 | HSO3 + Fe(oxaloaceta malate    |
| 2855 | Ferrocene  | HSO3    | -1.20277 | HSO3 + Fer(oxaloaceta malate   |
| 2856 | control    | HSO3    | 0.629114 | HSO3 + cor(oxaloaceta malate   |
| 2857 | FeCl2      | DMSO    | -0.77643 | DMSO + Fe(oxaloaceta malate    |
| 2858 | FeCl3      | DMSO    | -0.13691 | DMSO + Fe(oxaloaceta malate    |
| 2859 | Fe(ClO4)2  | DMSO    | 0.38648  | DMSO + Fe(oxaloaceta malate    |
| 2860 | Fe(ClO4)3  | DMSO    | 0.530327 | DMSO + Fe(oxaloaceta malate    |
| 2861 | Fe Sulfide | DMSO    | 0.136915 | DMSO + Fe(oxaloaceta malate    |
| 2862 | Fe Acetate | DMSO    | -0.29636 | DMSO + Fe(oxaloaceta malate    |
| 2863 | Ferrocene  | DMSO    | 0.490466 | DMSO + Fe(oxaloaceta malate    |
| 2864 | control    | DMSO    | -0.06066 | DMSO + co(oxaloaceta malate    |
| 2865 | FeCl2      | Cys     | -0.56846 | Cys + FeCl2(oxaloaceta malate  |
| 2866 | FeCl3      | Cys     | -0.31369 | Cys + FeCl3(oxaloaceta malate  |

|      |            |             |          |             |            |        |
|------|------------|-------------|----------|-------------|------------|--------|
| 2867 | Fe(ClO4)2  | Cys         | 0.197573 | Cys + Fe(Cl | oxaloaceta | malate |
| 2868 | Fe(ClO4)3  | Cys         | 0.492199 | Cys + Fe(Cl | oxaloaceta | malate |
| 2869 | Fe Sulfide | Cys         | -0.50606 | Cys + Fe Su | oxaloaceta | malate |
| 2870 | Fe Acetate | Cys         | 0.124783 | Cys + Fe Ac | oxaloaceta | malate |
| 2871 | Ferrocene  | Cys         | -0.14731 | Cys + Ferro | oxaloaceta | malate |
| 2872 | control    | Cys         | -1.31369 | Cys + contr | oxaloaceta | malate |
| 2873 | FeCl2      | Methionin   | -0.00693 | Methionin   | oxaloaceta | malate |
| 2874 | FeCl3      | Methionin   | -0.41941 | Methionin   | oxaloaceta | malate |
| 2875 | Fe(ClO4)2  | Methionin   | 0.214904 | Methionin   | oxaloaceta | malate |
| 2876 | Fe(ClO4)3  | Methionin   | 0.634313 | Methionin   | oxaloaceta | malate |
| 2877 | Fe Sulfide | Methionin   | 0.253032 | Methionin   | oxaloaceta | malate |
| 2878 | Fe Acetate | Methionin   | 0.112651 | Methionin   | oxaloaceta | malate |
| 2879 | Ferrocene  | Methionin   | -0.40208 | Methionin   | oxaloaceta | malate |
| 2880 | control    | Methionin   | -0.35528 | Methionin   | oxaloaceta | malate |
| 2881 | FeCl2      | Homocyste   | -0.40035 | Homocyste   | oxaloaceta | malate |
| 2882 | FeCl3      | Homocyste   | -0.0052  | Homocyste   | oxaloaceta | malate |
| 2883 | Fe(ClO4)2  | Homocyste   | -0.63431 | Homocyste   | oxaloaceta | malate |
| 2884 | Fe(ClO4)3  | Homocyste   | 0.61005  | Homocyste   | oxaloaceta | malate |
| 2885 | Fe Sulfide | Homocyste   | -0.19931 | Homocyste   | oxaloaceta | malate |
| 2886 | Fe Acetate | Homocyste   | -0.10745 | Homocyste   | oxaloaceta | malate |
| 2887 | Ferrocene  | Homocyste   | -0.90468 | Homocyste   | oxaloaceta | malate |
| 2888 | control    | Homocyste   | -0.61352 | Homocyste   | oxaloaceta | malate |
| 2889 | FeCl2      | DL-Ethionir | 0.431541 | DL-Ethionir | oxaloaceta | malate |
| 2890 | FeCl3      | DL-Ethionir | 1.079719 | DL-Ethionir | oxaloaceta | malate |
| 2891 | Fe(ClO4)2  | DL-Ethionir | 0.686306 | DL-Ethionir | oxaloaceta | malate |
| 2892 | Fe(ClO4)3  | DL-Ethionir | 1.176772 | DL-Ethionir | oxaloaceta | malate |
| 2893 | Fe Sulfide | DL-Ethionir | 1.422872 | DL-Ethionir | oxaloaceta | malate |
| 2894 | Fe Acetate | DL-Ethionir | 0.329288 | DL-Ethionir | oxaloaceta | malate |
| 2895 | Ferrocene  | DL-Ethionir | 0.253032 | DL-Ethionir | oxaloaceta | malate |
| 2896 | control    | DL-Ethionir | -0.39168 | DL-Ethionir | oxaloaceta | malate |
| 2897 | FeCl2      | 2-Mercapt   | 0.336221 | 2-Mercapt   | oxaloaceta | malate |
| 2898 | FeCl3      | 2-Mercapt   | 0.974    | 2-Mercapt   | oxaloaceta | malate |
| 2899 | Fe(ClO4)2  | 2-Mercapt   | 1.216634 | 2-Mercapt   | oxaloaceta | malate |
| 2900 | Fe(ClO4)3  | 2-Mercapt   | -0.2513  | 2-Mercapt   | oxaloaceta | malate |
| 2901 | Fe Sulfide | 2-Mercapt   | -0.60485 | 2-Mercapt   | oxaloaceta | malate |
| 2902 | Fe Acetate | 2-Mercapt   | -0.2773  | 2-Mercapt   | oxaloaceta | malate |
| 2903 | Ferrocene  | 2-Mercapt   | -0.487   | 2-Mercapt   | oxaloaceta | malate |
| 2904 | control    | 2-Mercapt   | -0.62218 | 2-Mercapt   | oxaloaceta | malate |
| 2905 | FeCl2      | S2O8        | 8.795134 | S2O8 + FeC  | pyruvate   | malate |
| 2906 | FeCl3      | S2O8        | 5.733205 | S2O8 + FeC  | pyruvate   | malate |
| 2907 | Fe(ClO4)2  | S2O8        | 8.130529 | S2O8 + Fe(i | pyruvate   | malate |
| 2908 | Fe(ClO4)3  | S2O8        | -0.31747 | S2O8 + Fe(i | pyruvate   | malate |
| 2909 | Fe Sulfide | S2O8        | 26.34782 | S2O8 + Fe ! | pyruvate   | malate |
| 2910 | Fe Acetate | S2O8        | 13.81132 | S2O8 + Fe , | pyruvate   | malate |
| 2911 | Ferrocene  | S2O8        | 9.790063 | S2O8 + Fer  | pyruvate   | malate |
| 2912 | control    | S2O8        | 29.30294 | S2O8 + con  | pyruvate   | malate |
| 2913 | FeCl2      | control     | 0.250216 | control + F | pyruvate   | malate |

|      |            |         |          |                            |        |
|------|------------|---------|----------|----------------------------|--------|
| 2914 | FeCl3      | control | 0.523178 | control + Fe pyruvate      | malate |
| 2915 | Fe(ClO4)2  | control | 0.809987 | control + Fe pyruvate      | malate |
| 2916 | Fe(ClO4)3  | control | 0.374829 | control + Fe pyruvate      | malate |
| 2917 | Fe Sulfide | control | -0.70713 | control + Fe pyruvate      | malate |
| 2918 | Fe Acetate | control | -0.02472 | control + Fe pyruvate      | malate |
| 2919 | Ferrocene  | control | -0.56076 | control + Fe pyruvate      | malate |
| 2920 | control    | control | -0.29175 | control + Fe pyruvate      | malate |
| 2921 | FeCl2      | SO4     | 0.004945 | SO4 + FeCl2 pyruvate       | malate |
| 2922 | FeCl3      | SO4     | 0.374829 | SO4 + FeCl3 pyruvate       | malate |
| 2923 | Fe(ClO4)2  | SO4     | 1.110642 | SO4 + Fe(ClO4)2 pyruvate   | malate |
| 2924 | Fe(ClO4)3  | SO4     | -0.8713  | SO4 + Fe(ClO4)3 pyruvate   | malate |
| 2925 | Fe Sulfide | SO4     | -0.45197 | SO4 + Fe Sulfide pyruvate  | malate |
| 2926 | Fe Acetate | SO4     | 0.3056   | SO4 + Fe Acetate pyruvate  | malate |
| 2927 | Ferrocene  | SO4     | -0.73482 | SO4 + Ferrocene pyruvate   | malate |
| 2928 | control    | SO4     | -0.38868 | SO4 + control pyruvate     | malate |
| 2929 | FeCl2      | SO3     | 1.785136 | SO3 + FeCl2 pyruvate       | malate |
| 2930 | FeCl3      | SO3     | 0.076153 | SO3 + FeCl3 pyruvate       | malate |
| 2931 | Fe(ClO4)2  | SO3     | 1.069104 | SO3 + Fe(ClO4)2 pyruvate   | malate |
| 2932 | Fe(ClO4)3  | SO3     | -0.12362 | SO3 + Fe(ClO4)3 pyruvate   | malate |
| 2933 | Fe Sulfide | SO3     | -0.53109 | SO3 + Fe Sulfide pyruvate  | malate |
| 2934 | Fe Acetate | SO3     | -0.02275 | SO3 + Fe Acetate pyruvate  | malate |
| 2935 | Ferrocene  | SO3     | -0.50933 | SO3 + Ferrocene pyruvate   | malate |
| 2936 | control    | SO3     | -0.42823 | SO3 + control pyruvate     | malate |
| 2937 | FeCl2      | HSO3    | 0.252194 | HSO3 + FeCl2 pyruvate      | malate |
| 2938 | FeCl3      | HSO3    | -0.54691 | HSO3 + FeCl3 pyruvate      | malate |
| 2939 | Fe(ClO4)2  | HSO3    | -0.39857 | HSO3 + Fe(ClO4)2 pyruvate  | malate |
| 2940 | Fe(ClO4)3  | HSO3    | -0.57065 | HSO3 + Fe(ClO4)3 pyruvate  | malate |
| 2941 | Fe Sulfide | HSO3    | 1.500306 | HSO3 + Fe Sulfide pyruvate | malate |
| 2942 | Fe Acetate | HSO3    | 1.189761 | HSO3 + Fe Acetate pyruvate | malate |
| 2943 | Ferrocene  | HSO3    | 1.225365 | HSO3 + Ferrocene pyruvate  | malate |
| 2944 | control    | HSO3    | -0.40252 | HSO3 + control pyruvate    | malate |
| 2945 | FeCl2      | DMSO    | -0.06231 | DMSO + FeCl2 pyruvate      | malate |
| 2946 | FeCl3      | DMSO    | -0.83966 | DMSO + FeCl3 pyruvate      | malate |
| 2947 | Fe(ClO4)2  | DMSO    | 0.143404 | DMSO + Fe(ClO4)2 pyruvate  | malate |
| 2948 | Fe(ClO4)3  | DMSO    | -0.00494 | DMSO + Fe(ClO4)3 pyruvate  | malate |
| 2949 | Fe Sulfide | DMSO    | -0.44999 | DMSO + Fe Sulfide pyruvate | malate |
| 2950 | Fe Acetate | DMSO    | 0.202744 | DMSO + Fe Acetate pyruvate | malate |
| 2951 | Ferrocene  | DMSO    | -0.67944 | DMSO + Ferrocene pyruvate  | malate |
| 2952 | control    | DMSO    | -0.27791 | DMSO + control pyruvate    | malate |
| 2953 | FeCl2      | Cys     | 0.163184 | Cys + FeCl2 pyruvate       | malate |
| 2954 | FeCl3      | Cys     | 1.589315 | Cys + FeCl3 pyruvate       | malate |
| 2955 | Fe(ClO4)2  | Cys     | 0.442081 | Cys + Fe(ClO4)2 pyruvate   | malate |
| 2956 | Fe(ClO4)3  | Cys     | 1.330199 | Cys + Fe(ClO4)3 pyruvate   | malate |
| 2957 | Fe Sulfide | Cys     | 0.208678 | Cys + Fe Sulfide pyruvate  | malate |
| 2958 | Fe Acetate | Cys     | 1.128444 | Cys + Fe Acetate pyruvate  | malate |
| 2959 | Ferrocene  | Cys     | -0.539   | Cys + Ferrocene pyruvate   | malate |
| 2960 | control    | Cys     | -0.40252 | Cys + control pyruvate     | malate |

|      |            |             |          |                        |        |
|------|------------|-------------|----------|------------------------|--------|
| 2961 | FeCl2      | Methionine  | -0.52516 | Methionine pyruvate    | malate |
| 2962 | FeCl3      | Methionine  | 0.044505 | Methionine pyruvate    | malate |
| 2963 | Fe(ClO4)2  | Methionine  | -0.47571 | Methionine pyruvate    | malate |
| 2964 | Fe(ClO4)3  | Methionine  | 0.091977 | Methionine pyruvate    | malate |
| 2965 | Fe Sulfide | Methionine  | -0.17505 | Methionine pyruvate    | malate |
| 2966 | Fe Acetate | Methionine  | -0.38868 | Methionine pyruvate    | malate |
| 2967 | Ferrocene  | Methionine  | -0.61812 | Methionine pyruvate    | malate |
| 2968 | control    | Methionine  | -0.83174 | Methionine pyruvate    | malate |
| 2969 | FeCl2      | Homocyste   | 0.67944  | Homocyste pyruvate     | malate |
| 2970 | FeCl3      | Homocyste   | 0.554826 | Homocyste pyruvate     | malate |
| 2971 | Fe(ClO4)2  | Homocyste   | 0.402521 | Homocyste pyruvate     | malate |
| 2972 | Fe(ClO4)3  | Homocyste   | 0.368895 | Homocyste pyruvate     | malate |
| 2973 | Fe Sulfide | Homocyste   | 0.27593  | Homocyste pyruvate     | malate |
| 2974 | Fe Acetate | Homocyste   | 0.455927 | Homocyste pyruvate     | malate |
| 2975 | Ferrocene  | Homocyste   | -0.4856  | Homocyste pyruvate     | malate |
| 2976 | control    | Homocyste   | -0.78427 | Homocyste pyruvate     | malate |
| 2977 | FeCl2      | DL-Ethionir | 0.040549 | DL-Ethionir pyruvate   | malate |
| 2978 | FeCl3      | DL-Ethionir | 0.038571 | DL-Ethionir pyruvate   | malate |
| 2979 | Fe(ClO4)2  | DL-Ethionir | -0.56274 | DL-Ethionir pyruvate   | malate |
| 2980 | Fe(ClO4)3  | DL-Ethionir | -0.25813 | DL-Ethionir pyruvate   | malate |
| 2981 | Fe Sulfide | DL-Ethionir | -0.3056  | DL-Ethionir pyruvate   | malate |
| 2982 | Fe Acetate | DL-Ethionir | -0.27395 | DL-Ethionir pyruvate   | malate |
| 2983 | Ferrocene  | DL-Ethionir | -0.44999 | DL-Ethionir pyruvate   | malate |
| 2984 | control    | DL-Ethionir | -0.59636 | DL-Ethionir pyruvate   | malate |
| 2985 | FeCl2      | 2-Mercapt   | -0.19483 | 2-Mercapt pyruvate     | malate |
| 2986 | FeCl3      | 2-Mercapt   | 0.341203 | 2-Mercapt pyruvate     | malate |
| 2987 | Fe(ClO4)2  | 2-Mercapt   | 0.218568 | 2-Mercapt pyruvate     | malate |
| 2988 | Fe(ClO4)3  | 2-Mercapt   | 0.653726 | 2-Mercapt pyruvate     | malate |
| 2989 | Fe Sulfide | 2-Mercapt   | -0.26802 | 2-Mercapt pyruvate     | malate |
| 2990 | Fe Acetate | 2-Mercapt   | 0.29571  | 2-Mercapt pyruvate     | malate |
| 2991 | Ferrocene  | 2-Mercapt   | -0.59636 | 2-Mercapt pyruvate     | malate |
| 2992 | control    | 2-Mercapt   | -0.81592 | 2-Mercapt pyruvate     | malate |
| 2993 | FeCl2      | S2O8        | NA       | S2O8 + FeC succinate   | malate |
| 2994 | FeCl3      | S2O8        | NA       | S2O8 + FeC succinate   | malate |
| 2995 | Fe(ClO4)2  | S2O8        | NA       | S2O8 + Fe( succinate   | malate |
| 2996 | Fe(ClO4)3  | S2O8        | NA       | S2O8 + Fe( succinate   | malate |
| 2997 | Fe Sulfide | S2O8        | NA       | S2O8 + Fe ! succinate  | malate |
| 2998 | Fe Acetate | S2O8        | NA       | S2O8 + Fe / succinate  | malate |
| 2999 | Ferrocene  | S2O8        | NA       | S2O8 + Fer succinate   | malate |
| 3000 | control    | S2O8        | NA       | S2O8 + con succinate   | malate |
| 3001 | FeCl2      | control     | NA       | control + Fi succinate | malate |
| 3002 | FeCl3      | control     | NA       | control + Fi succinate | malate |
| 3003 | Fe(ClO4)2  | control     | NA       | control + Fi succinate | malate |
| 3004 | Fe(ClO4)3  | control     | NA       | control + Fi succinate | malate |
| 3005 | Fe Sulfide | control     | NA       | control + Fi succinate | malate |
| 3006 | Fe Acetate | control     | NA       | control + Fi succinate | malate |
| 3007 | Ferrocene  | control     | NA       | control + Fi succinate | malate |



|      |            |           |    |             |           |        |
|------|------------|-----------|----|-------------|-----------|--------|
| 3008 | control    | control   | NA | control + c | succinate | malate |
| 3009 | FeCl2      | SO4       | NA | SO4 + FeCl  | succinate | malate |
| 3010 | FeCl3      | SO4       | NA | SO4 + FeCl  | succinate | malate |
| 3011 | Fe(ClO4)2  | SO4       | NA | SO4 + Fe(C  | succinate | malate |
| 3012 | Fe(ClO4)3  | SO4       | NA | SO4 + Fe(C  | succinate | malate |
| 3013 | Fe Sulfide | SO4       | NA | SO4 + Fe S  | succinate | malate |
| 3014 | Fe Acetate | SO4       | NA | SO4 + Fe A  | succinate | malate |
| 3015 | Ferrocene  | SO4       | NA | SO4 + Ferr  | succinate | malate |
| 3016 | control    | SO4       | NA | SO4 + cont  | succinate | malate |
| 3017 | FeCl2      | SO3       | NA | SO3 + FeCl  | succinate | malate |
| 3018 | FeCl3      | SO3       | NA | SO3 + FeCl  | succinate | malate |
| 3019 | Fe(ClO4)2  | SO3       | NA | SO3 + Fe(C  | succinate | malate |
| 3020 | Fe(ClO4)3  | SO3       | NA | SO3 + Fe(C  | succinate | malate |
| 3021 | Fe Sulfide | SO3       | NA | SO3 + Fe S  | succinate | malate |
| 3022 | Fe Acetate | SO3       | NA | SO3 + Fe A  | succinate | malate |
| 3023 | Ferrocene  | SO3       | NA | SO3 + Ferr  | succinate | malate |
| 3024 | control    | SO3       | NA | SO3 + cont  | succinate | malate |
| 3025 | FeCl2      | HSO3      | NA | HSO3 + Fe   | succinate | malate |
| 3026 | FeCl3      | HSO3      | NA | HSO3 + Fe   | succinate | malate |
| 3027 | Fe(ClO4)2  | HSO3      | NA | HSO3 + Fe   | succinate | malate |
| 3028 | Fe(ClO4)3  | HSO3      | NA | HSO3 + Fe   | succinate | malate |
| 3029 | Fe Sulfide | HSO3      | NA | HSO3 + Fe   | succinate | malate |
| 3030 | Fe Acetate | HSO3      | NA | HSO3 + Fe   | succinate | malate |
| 3031 | Ferrocene  | HSO3      | NA | HSO3 + Fer  | succinate | malate |
| 3032 | control    | HSO3      | NA | HSO3 + cor  | succinate | malate |
| 3033 | FeCl2      | DMSO      | NA | DMSO + Fe   | succinate | malate |
| 3034 | FeCl3      | DMSO      | NA | DMSO + Fe   | succinate | malate |
| 3035 | Fe(ClO4)2  | DMSO      | NA | DMSO + Fe   | succinate | malate |
| 3036 | Fe(ClO4)3  | DMSO      | NA | DMSO + Fe   | succinate | malate |
| 3037 | Fe Sulfide | DMSO      | NA | DMSO + Fe   | succinate | malate |
| 3038 | Fe Acetate | DMSO      | NA | DMSO + Fe   | succinate | malate |
| 3039 | Ferrocene  | DMSO      | NA | DMSO + Fe   | succinate | malate |
| 3040 | control    | DMSO      | NA | DMSO + co   | succinate | malate |
| 3041 | FeCl2      | Cys       | NA | Cys + FeCl2 | succinate | malate |
| 3042 | FeCl3      | Cys       | NA | Cys + FeCl3 | succinate | malate |
| 3043 | Fe(ClO4)2  | Cys       | NA | Cys + Fe(Cl | succinate | malate |
| 3044 | Fe(ClO4)3  | Cys       | NA | Cys + Fe(Cl | succinate | malate |
| 3045 | Fe Sulfide | Cys       | NA | Cys + Fe S  | succinate | malate |
| 3046 | Fe Acetate | Cys       | NA | Cys + Fe Ac | succinate | malate |
| 3047 | Ferrocene  | Cys       | NA | Cys + Ferro | succinate | malate |
| 3048 | control    | Cys       | NA | Cys + contr | succinate | malate |
| 3049 | FeCl2      | Methionin | NA | Methionin   | succinate | malate |
| 3050 | FeCl3      | Methionin | NA | Methionin   | succinate | malate |
| 3051 | Fe(ClO4)2  | Methionin | NA | Methionin   | succinate | malate |
| 3052 | Fe(ClO4)3  | Methionin | NA | Methionin   | succinate | malate |
| 3053 | Fe Sulfide | Methionin | NA | Methionin   | succinate | malate |
| 3054 | Fe Acetate | Methionin | NA | Methionin   | succinate | malate |

|      |            |              |    |                         |        |
|------|------------|--------------|----|-------------------------|--------|
| 3055 | Ferrocene  | Methionine   | NA | Methionine succinate    | malate |
| 3056 | control    | Methionine   | NA | Methionine succinate    | malate |
| 3057 | FeCl2      | Homocysteine | NA | Homocysteine succinate  | malate |
| 3058 | FeCl3      | Homocysteine | NA | Homocysteine succinate  | malate |
| 3059 | Fe(ClO4)2  | Homocysteine | NA | Homocysteine succinate  | malate |
| 3060 | Fe(ClO4)3  | Homocysteine | NA | Homocysteine succinate  | malate |
| 3061 | Fe Sulfide | Homocysteine | NA | Homocysteine succinate  | malate |
| 3062 | Fe Acetate | Homocysteine | NA | Homocysteine succinate  | malate |
| 3063 | Ferrocene  | Homocysteine | NA | Homocysteine succinate  | malate |
| 3064 | control    | Homocysteine | NA | Homocysteine succinate  | malate |
| 3065 | FeCl2      | DL-Ethionine | NA | DL-Ethionine succinate  | malate |
| 3066 | FeCl3      | DL-Ethionine | NA | DL-Ethionine succinate  | malate |
| 3067 | Fe(ClO4)2  | DL-Ethionine | NA | DL-Ethionine succinate  | malate |
| 3068 | Fe(ClO4)3  | DL-Ethionine | NA | DL-Ethionine succinate  | malate |
| 3069 | Fe Sulfide | DL-Ethionine | NA | DL-Ethionine succinate  | malate |
| 3070 | Fe Acetate | DL-Ethionine | NA | DL-Ethionine succinate  | malate |
| 3071 | Ferrocene  | DL-Ethionine | NA | DL-Ethionine succinate  | malate |
| 3072 | control    | DL-Ethionine | NA | DL-Ethionine succinate  | malate |
| 3073 | FeCl2      | 2-Mercaptone | NA | 2-Mercaptone succinate  | malate |
| 3074 | FeCl3      | 2-Mercaptone | NA | 2-Mercaptone succinate  | malate |
| 3075 | Fe(ClO4)2  | 2-Mercaptone | NA | 2-Mercaptone succinate  | malate |
| 3076 | Fe(ClO4)3  | 2-Mercaptone | NA | 2-Mercaptone succinate  | malate |
| 3077 | Fe Sulfide | 2-Mercaptone | NA | 2-Mercaptone succinate  | malate |
| 3078 | Fe Acetate | 2-Mercaptone | NA | 2-Mercaptone succinate  | malate |
| 3079 | Ferrocene  | 2-Mercaptone | NA | 2-Mercaptone succinate  | malate |
| 3080 | control    | 2-Mercaptone | NA | 2-Mercaptone succinate  | malate |
| 3081 | FeCl2      | S2O8         | NA | S2O8 + FeC succsemial   | malate |
| 3082 | FeCl3      | S2O8         | NA | S2O8 + FeC succsemial   | malate |
| 3083 | Fe(ClO4)2  | S2O8         | NA | S2O8 + Fe(i) succsemial | malate |
| 3084 | Fe(ClO4)3  | S2O8         | NA | S2O8 + Fe(i) succsemial | malate |
| 3085 | Fe Sulfide | S2O8         | NA | S2O8 + Fe ' succsemial  | malate |
| 3086 | Fe Acetate | S2O8         | NA | S2O8 + Fe , succsemial  | malate |
| 3087 | Ferrocene  | S2O8         | NA | S2O8 + Fer succsemial   | malate |
| 3088 | control    | S2O8         | NA | S2O8 + con succsemial   | malate |
| 3089 | FeCl2      | control      | NA | control + Fi succsemial | malate |
| 3090 | FeCl3      | control      | NA | control + Fi succsemial | malate |
| 3091 | Fe(ClO4)2  | control      | NA | control + Fi succsemial | malate |
| 3092 | Fe(ClO4)3  | control      | NA | control + Fi succsemial | malate |
| 3093 | Fe Sulfide | control      | NA | control + Fi succsemial | malate |
| 3094 | Fe Acetate | control      | NA | control + Fi succsemial | malate |
| 3095 | Ferrocene  | control      | NA | control + Fi succsemial | malate |
| 3096 | control    | control      | NA | control + ci succsemial | malate |
| 3097 | FeCl2      | SO4          | NA | SO4 + FeCl: succsemial  | malate |
| 3098 | FeCl3      | SO4          | NA | SO4 + FeCl: succsemial  | malate |
| 3099 | Fe(ClO4)2  | SO4          | NA | SO4 + Fe(C succsemial   | malate |
| 3100 | Fe(ClO4)3  | SO4          | NA | SO4 + Fe(C succsemial   | malate |
| 3101 | Fe Sulfide | SO4          | NA | SO4 + Fe Si succsemial  | malate |

|      |            |           |    |                               |
|------|------------|-----------|----|-------------------------------|
| 3102 | Fe Acetate | SO4       | NA | SO4 + Fe A succsemial malate  |
| 3103 | Ferrocene  | SO4       | NA | SO4 + Ferr succsemial malate  |
| 3104 | control    | SO4       | NA | SO4 + cont succsemial malate  |
| 3105 | FeCl2      | SO3       | NA | SO3 + FeCl succsemial malate  |
| 3106 | FeCl3      | SO3       | NA | SO3 + FeCl succsemial malate  |
| 3107 | Fe(ClO4)2  | SO3       | NA | SO3 + Fe(C succsemial malate  |
| 3108 | Fe(ClO4)3  | SO3       | NA | SO3 + Fe(C succsemial malate  |
| 3109 | Fe Sulfide | SO3       | NA | SO3 + Fe S succsemial malate  |
| 3110 | Fe Acetate | SO3       | NA | SO3 + Fe A succsemial malate  |
| 3111 | Ferrocene  | SO3       | NA | SO3 + Ferr succsemial malate  |
| 3112 | control    | SO3       | NA | SO3 + cont succsemial malate  |
| 3113 | FeCl2      | HSO3      | NA | HSO3 + FeC succsemial malate  |
| 3114 | FeCl3      | HSO3      | NA | HSO3 + FeC succsemial malate  |
| 3115 | Fe(ClO4)2  | HSO3      | NA | HSO3 + Fe( succsemial malate  |
| 3116 | Fe(ClO4)3  | HSO3      | NA | HSO3 + Fe( succsemial malate  |
| 3117 | Fe Sulfide | HSO3      | NA | HSO3 + Fe : succsemial malate |
| 3118 | Fe Acetate | HSO3      | NA | HSO3 + Fe . succsemial malate |
| 3119 | Ferrocene  | HSO3      | NA | HSO3 + Fer succsemial malate  |
| 3120 | control    | HSO3      | NA | HSO3 + cor succsemial malate  |
| 3121 | FeCl2      | DMSO      | NA | DMSO + Fe succsemial malate   |
| 3122 | FeCl3      | DMSO      | NA | DMSO + Fe succsemial malate   |
| 3123 | Fe(ClO4)2  | DMSO      | NA | DMSO + Fe succsemial malate   |
| 3124 | Fe(ClO4)3  | DMSO      | NA | DMSO + Fe succsemial malate   |
| 3125 | Fe Sulfide | DMSO      | NA | DMSO + Fe succsemial malate   |
| 3126 | Fe Acetate | DMSO      | NA | DMSO + Fe succsemial malate   |
| 3127 | Ferrocene  | DMSO      | NA | DMSO + Fe succsemial malate   |
| 3128 | control    | DMSO      | NA | DMSO + co succsemial malate   |
| 3129 | FeCl2      | Cys       | NA | Cys + FeCl2 succsemial malate |
| 3130 | FeCl3      | Cys       | NA | Cys + FeCl3 succsemial malate |
| 3131 | Fe(ClO4)2  | Cys       | NA | Cys + Fe(Cl succsemial malate |
| 3132 | Fe(ClO4)3  | Cys       | NA | Cys + Fe(Cl succsemial malate |
| 3133 | Fe Sulfide | Cys       | NA | Cys + Fe Su succsemial malate |
| 3134 | Fe Acetate | Cys       | NA | Cys + Fe Ac succsemial malate |
| 3135 | Ferrocene  | Cys       | NA | Cys + Ferro succsemial malate |
| 3136 | control    | Cys       | NA | Cys + contr succsemial malate |
| 3137 | FeCl2      | Methionin | NA | Methionin succsemial malate   |
| 3138 | FeCl3      | Methionin | NA | Methionin succsemial malate   |
| 3139 | Fe(ClO4)2  | Methionin | NA | Methionin succsemial malate   |
| 3140 | Fe(ClO4)3  | Methionin | NA | Methionin succsemial malate   |
| 3141 | Fe Sulfide | Methionin | NA | Methionin succsemial malate   |
| 3142 | Fe Acetate | Methionin | NA | Methionin succsemial malate   |
| 3143 | Ferrocene  | Methionin | NA | Methionin succsemial malate   |
| 3144 | control    | Methionin | NA | Methionin succsemial malate   |
| 3145 | FeCl2      | Homocyste | NA | Homocyste succsemial malate   |
| 3146 | FeCl3      | Homocyste | NA | Homocyste succsemial malate   |
| 3147 | Fe(ClO4)2  | Homocyste | NA | Homocyste succsemial malate   |
| 3148 | Fe(ClO4)3  | Homocyste | NA | Homocyste succsemial malate   |

|      |                                    |                               |    |                                                           |
|------|------------------------------------|-------------------------------|----|-----------------------------------------------------------|
| 3149 | Fe Sulfide                         | Homocyste                     | NA | Homocyste succsemial malate                               |
| 3150 | Fe Acetate                         | Homocyste                     | NA | Homocyste succsemial malate                               |
| 3151 | Ferrocene                          | Homocyste                     | NA | Homocyste succsemial malate                               |
| 3152 | control                            | Homocyste                     | NA | Homocyste succsemial malate                               |
| 3153 | FeCl <sub>2</sub>                  | DL-Ethionir                   | NA | DL-Ethionir succsemial malate                             |
| 3154 | FeCl <sub>3</sub>                  | DL-Ethionir                   | NA | DL-Ethionir succsemial malate                             |
| 3155 | Fe(ClO <sub>4</sub> ) <sub>2</sub> | DL-Ethionir                   | NA | DL-Ethionir succsemial malate                             |
| 3156 | Fe(ClO <sub>4</sub> ) <sub>3</sub> | DL-Ethionir                   | NA | DL-Ethionir succsemial malate                             |
| 3157 | Fe Sulfide                         | DL-Ethionir                   | NA | DL-Ethionir succsemial malate                             |
| 3158 | Fe Acetate                         | DL-Ethionir                   | NA | DL-Ethionir succsemial malate                             |
| 3159 | Ferrocene                          | DL-Ethionir                   | NA | DL-Ethionir succsemial malate                             |
| 3160 | control                            | DL-Ethionir                   | NA | DL-Ethionir succsemial malate                             |
| 3161 | FeCl <sub>2</sub>                  | 2-Mercapt                     | NA | 2-Mercapt succsemial malate                               |
| 3162 | FeCl <sub>3</sub>                  | 2-Mercapt                     | NA | 2-Mercapt succsemial malate                               |
| 3163 | Fe(ClO <sub>4</sub> ) <sub>2</sub> | 2-Mercapt                     | NA | 2-Mercapt succsemial malate                               |
| 3164 | Fe(ClO <sub>4</sub> ) <sub>3</sub> | 2-Mercapt                     | NA | 2-Mercapt succsemial malate                               |
| 3165 | Fe Sulfide                         | 2-Mercapt                     | NA | 2-Mercapt succsemial malate                               |
| 3166 | Fe Acetate                         | 2-Mercapt                     | NA | 2-Mercapt succsemial malate                               |
| 3167 | Ferrocene                          | 2-Mercapt                     | NA | 2-Mercapt succsemial malate                               |
| 3168 | control                            | 2-Mercapt                     | NA | 2-Mercapt succsemial malate                               |
| 3169 | FeCl <sub>2</sub>                  | S <sub>2</sub> O <sub>8</sub> | NA | S <sub>2</sub> O <sub>8</sub> + FeC alphaketog succinate  |
| 3170 | FeCl <sub>3</sub>                  | S <sub>2</sub> O <sub>8</sub> | NA | S <sub>2</sub> O <sub>8</sub> + FeC alphaketog succinate  |
| 3171 | Fe(ClO <sub>4</sub> ) <sub>2</sub> | S <sub>2</sub> O <sub>8</sub> | NA | S <sub>2</sub> O <sub>8</sub> + Fe(α alphaketog succinate |
| 3172 | Fe(ClO <sub>4</sub> ) <sub>3</sub> | S <sub>2</sub> O <sub>8</sub> | NA | S <sub>2</sub> O <sub>8</sub> + Fe(α alphaketog succinate |
| 3173 | Fe Sulfide                         | S <sub>2</sub> O <sub>8</sub> | NA | S <sub>2</sub> O <sub>8</sub> + Fe β alphaketog succinate |
| 3174 | Fe Acetate                         | S <sub>2</sub> O <sub>8</sub> | NA | S <sub>2</sub> O <sub>8</sub> + Fe γ alphaketog succinate |
| 3175 | Ferrocene                          | S <sub>2</sub> O <sub>8</sub> | NA | S <sub>2</sub> O <sub>8</sub> + Fer alphaketog succinate  |
| 3176 | control                            | S <sub>2</sub> O <sub>8</sub> | NA | S <sub>2</sub> O <sub>8</sub> + con alphaketog succinate  |
| 3177 | FeCl <sub>2</sub>                  | control                       | NA | control + Fr alphaketog succinate                         |
| 3178 | FeCl <sub>3</sub>                  | control                       | NA | control + Fr alphaketog succinate                         |
| 3179 | Fe(ClO <sub>4</sub> ) <sub>2</sub> | control                       | NA | control + Fr alphaketog succinate                         |
| 3180 | Fe(ClO <sub>4</sub> ) <sub>3</sub> | control                       | NA | control + Fr alphaketog succinate                         |
| 3181 | Fe Sulfide                         | control                       | NA | control + Fr alphaketog succinate                         |
| 3182 | Fe Acetate                         | control                       | NA | control + Fr alphaketog succinate                         |
| 3183 | Ferrocene                          | control                       | NA | control + Fr alphaketog succinate                         |
| 3184 | control                            | control                       | NA | control + cr alphaketog succinate                         |
| 3185 | FeCl <sub>2</sub>                  | SO <sub>4</sub>               | NA | SO <sub>4</sub> + FeCl: alphaketog succinate              |
| 3186 | FeCl <sub>3</sub>                  | SO <sub>4</sub>               | NA | SO <sub>4</sub> + FeCl: alphaketog succinate              |
| 3187 | Fe(ClO <sub>4</sub> ) <sub>2</sub> | SO <sub>4</sub>               | NA | SO <sub>4</sub> + Fe(C alphaketog succinate               |
| 3188 | Fe(ClO <sub>4</sub> ) <sub>3</sub> | SO <sub>4</sub>               | NA | SO <sub>4</sub> + Fe(C alphaketog succinate               |
| 3189 | Fe Sulfide                         | SO <sub>4</sub>               | NA | SO <sub>4</sub> + Fe Sα alphaketog succinate              |
| 3190 | Fe Acetate                         | SO <sub>4</sub>               | NA | SO <sub>4</sub> + Fe Aα alphaketog succinate              |
| 3191 | Ferrocene                          | SO <sub>4</sub>               | NA | SO <sub>4</sub> + Ferrα alphaketog succinate              |
| 3192 | control                            | SO <sub>4</sub>               | NA | SO <sub>4</sub> + cont alphaketog succinate               |
| 3193 | FeCl <sub>2</sub>                  | SO <sub>3</sub>               | NA | SO <sub>3</sub> + FeCl: alphaketog succinate              |
| 3194 | FeCl <sub>3</sub>                  | SO <sub>3</sub>               | NA | SO <sub>3</sub> + FeCl: alphaketog succinate              |
| 3195 | Fe(ClO <sub>4</sub> ) <sub>2</sub> | SO <sub>3</sub>               | NA | SO <sub>3</sub> + Fe(C alphaketog succinate               |

|      |            |             |    |             |                      |
|------|------------|-------------|----|-------------|----------------------|
| 3196 | Fe(ClO4)3  | SO3         | NA | SO3 + Fe(C  | alphaketog succinate |
| 3197 | Fe Sulfide | SO3         | NA | SO3 + Fe S  | alphaketog succinate |
| 3198 | Fe Acetate | SO3         | NA | SO3 + Fe A  | alphaketog succinate |
| 3199 | Ferrocene  | SO3         | NA | SO3 + Ferr  | alphaketog succinate |
| 3200 | control    | SO3         | NA | SO3 + cont  | alphaketog succinate |
| 3201 | FeCl2      | HSO3        | NA | HSO3 + Fe(C | alphaketog succinate |
| 3202 | FeCl3      | HSO3        | NA | HSO3 + Fe(C | alphaketog succinate |
| 3203 | Fe(ClO4)2  | HSO3        | NA | HSO3 + Fe(  | alphaketog succinate |
| 3204 | Fe(ClO4)3  | HSO3        | NA | HSO3 + Fe(  | alphaketog succinate |
| 3205 | Fe Sulfide | HSO3        | NA | HSO3 + Fe   | alphaketog succinate |
| 3206 | Fe Acetate | HSO3        | NA | HSO3 + Fe   | alphaketog succinate |
| 3207 | Ferrocene  | HSO3        | NA | HSO3 + Fer  | alphaketog succinate |
| 3208 | control    | HSO3        | NA | HSO3 + cor  | alphaketog succinate |
| 3209 | FeCl2      | DMSO        | NA | DMSO + Fe   | alphaketog succinate |
| 3210 | FeCl3      | DMSO        | NA | DMSO + Fe   | alphaketog succinate |
| 3211 | Fe(ClO4)2  | DMSO        | NA | DMSO + Fe   | alphaketog succinate |
| 3212 | Fe(ClO4)3  | DMSO        | NA | DMSO + Fe   | alphaketog succinate |
| 3213 | Fe Sulfide | DMSO        | NA | DMSO + Fe   | alphaketog succinate |
| 3214 | Fe Acetate | DMSO        | NA | DMSO + Fe   | alphaketog succinate |
| 3215 | Ferrocene  | DMSO        | NA | DMSO + Fe   | alphaketog succinate |
| 3216 | control    | DMSO        | NA | DMSO + co   | alphaketog succinate |
| 3217 | FeCl2      | Cys         | NA | Cys + FeCl2 | alphaketog succinate |
| 3218 | FeCl3      | Cys         | NA | Cys + FeCl3 | alphaketog succinate |
| 3219 | Fe(ClO4)2  | Cys         | NA | Cys + Fe(Cl | alphaketog succinate |
| 3220 | Fe(ClO4)3  | Cys         | NA | Cys + Fe(Cl | alphaketog succinate |
| 3221 | Fe Sulfide | Cys         | NA | Cys + Fe Su | alphaketog succinate |
| 3222 | Fe Acetate | Cys         | NA | Cys + Fe Ac | alphaketog succinate |
| 3223 | Ferrocene  | Cys         | NA | Cys + Ferro | alphaketog succinate |
| 3224 | control    | Cys         | NA | Cys + contr | alphaketog succinate |
| 3225 | FeCl2      | Methionin   | NA | Methionin   | alphaketog succinate |
| 3226 | FeCl3      | Methionin   | NA | Methionin   | alphaketog succinate |
| 3227 | Fe(ClO4)2  | Methionin   | NA | Methionin   | alphaketog succinate |
| 3228 | Fe(ClO4)3  | Methionin   | NA | Methionin   | alphaketog succinate |
| 3229 | Fe Sulfide | Methionin   | NA | Methionin   | alphaketog succinate |
| 3230 | Fe Acetate | Methionin   | NA | Methionin   | alphaketog succinate |
| 3231 | Ferrocene  | Methionin   | NA | Methionin   | alphaketog succinate |
| 3232 | control    | Methionin   | NA | Methionin   | alphaketog succinate |
| 3233 | FeCl2      | Homocyste   | NA | Homocyste   | alphaketog succinate |
| 3234 | FeCl3      | Homocyste   | NA | Homocyste   | alphaketog succinate |
| 3235 | Fe(ClO4)2  | Homocyste   | NA | Homocyste   | alphaketog succinate |
| 3236 | Fe(ClO4)3  | Homocyste   | NA | Homocyste   | alphaketog succinate |
| 3237 | Fe Sulfide | Homocyste   | NA | Homocyste   | alphaketog succinate |
| 3238 | Fe Acetate | Homocyste   | NA | Homocyste   | alphaketog succinate |
| 3239 | Ferrocene  | Homocyste   | NA | Homocyste   | alphaketog succinate |
| 3240 | control    | Homocyste   | NA | Homocyste   | alphaketog succinate |
| 3241 | FeCl2      | DL-Ethionir | NA | DL-Ethionir | alphaketog succinate |
| 3242 | FeCl3      | DL-Ethionir | NA | DL-Ethionir | alphaketog succinate |

|      |            |             |    |                                    |
|------|------------|-------------|----|------------------------------------|
| 3243 | Fe(ClO4)2  | DL-Ethionir | NA | DL-Ethionir alphaketog succinate   |
| 3244 | Fe(ClO4)3  | DL-Ethionir | NA | DL-Ethionir alphaketog succinate   |
| 3245 | Fe Sulfide | DL-Ethionir | NA | DL-Ethionir alphaketog succinate   |
| 3246 | Fe Acetate | DL-Ethionir | NA | DL-Ethionir alphaketog succinate   |
| 3247 | Ferrocene  | DL-Ethionir | NA | DL-Ethionir alphaketog succinate   |
| 3248 | control    | DL-Ethionir | NA | DL-Ethionir alphaketog succinate   |
| 3249 | FeCl2      | 2-Mercapt   | NA | 2-Mercapt alphaketog succinate     |
| 3250 | FeCl3      | 2-Mercapt   | NA | 2-Mercapt alphaketog succinate     |
| 3251 | Fe(ClO4)2  | 2-Mercapt   | NA | 2-Mercapt alphaketog succinate     |
| 3252 | Fe(ClO4)3  | 2-Mercapt   | NA | 2-Mercapt alphaketog succinate     |
| 3253 | Fe Sulfide | 2-Mercapt   | NA | 2-Mercapt alphaketog succinate     |
| 3254 | Fe Acetate | 2-Mercapt   | NA | 2-Mercapt alphaketog succinate     |
| 3255 | Ferrocene  | 2-Mercapt   | NA | 2-Mercapt alphaketog succinate     |
| 3256 | control    | 2-Mercapt   | NA | 2-Mercapt alphaketog succinate     |
| 3257 | FeCl2      | S2O8        | NA | S2O8 + FeC cisaconitat succinate   |
| 3258 | FeCl3      | S2O8        | NA | S2O8 + FeC cisaconitat succinate   |
| 3259 | Fe(ClO4)2  | S2O8        | NA | S2O8 + Fe( cisaconitat succinate   |
| 3260 | Fe(ClO4)3  | S2O8        | NA | S2O8 + Fe( cisaconitat succinate   |
| 3261 | Fe Sulfide | S2O8        | NA | S2O8 + Fe ! cisaconitat succinate  |
| 3262 | Fe Acetate | S2O8        | NA | S2O8 + Fe / cisaconitat succinate  |
| 3263 | Ferrocene  | S2O8        | NA | S2O8 + Fer cisaconitat succinate   |
| 3264 | control    | S2O8        | NA | S2O8 + con cisaconitat succinate   |
| 3265 | FeCl2      | control     | NA | control + Fi cisaconitat succinate |
| 3266 | FeCl3      | control     | NA | control + Fi cisaconitat succinate |
| 3267 | Fe(ClO4)2  | control     | NA | control + Fi cisaconitat succinate |
| 3268 | Fe(ClO4)3  | control     | NA | control + Fi cisaconitat succinate |
| 3269 | Fe Sulfide | control     | NA | control + Fi cisaconitat succinate |
| 3270 | Fe Acetate | control     | NA | control + Fi cisaconitat succinate |
| 3271 | Ferrocene  | control     | NA | control + Fi cisaconitat succinate |
| 3272 | control    | control     | NA | control + ci cisaconitat succinate |
| 3273 | FeCl2      | SO4         | NA | SO4 + FeCl: cisaconitat succinate  |
| 3274 | FeCl3      | SO4         | NA | SO4 + FeCl: cisaconitat succinate  |
| 3275 | Fe(ClO4)2  | SO4         | NA | SO4 + Fe(C cisaconitat succinate   |
| 3276 | Fe(ClO4)3  | SO4         | NA | SO4 + Fe(C cisaconitat succinate   |
| 3277 | Fe Sulfide | SO4         | NA | SO4 + Fe S: cisaconitat succinate  |
| 3278 | Fe Acetate | SO4         | NA | SO4 + Fe A: cisaconitat succinate  |
| 3279 | Ferrocene  | SO4         | NA | SO4 + Ferr: cisaconitat succinate  |
| 3280 | control    | SO4         | NA | SO4 + cont cisaconitat succinate   |
| 3281 | FeCl2      | SO3         | NA | SO3 + FeCl: cisaconitat succinate  |
| 3282 | FeCl3      | SO3         | NA | SO3 + FeCl: cisaconitat succinate  |
| 3283 | Fe(ClO4)2  | SO3         | NA | SO3 + Fe(C cisaconitat succinate   |
| 3284 | Fe(ClO4)3  | SO3         | NA | SO3 + Fe(C cisaconitat succinate   |
| 3285 | Fe Sulfide | SO3         | NA | SO3 + Fe S: cisaconitat succinate  |
| 3286 | Fe Acetate | SO3         | NA | SO3 + Fe A: cisaconitat succinate  |
| 3287 | Ferrocene  | SO3         | NA | SO3 + Ferr: cisaconitat succinate  |
| 3288 | control    | SO3         | NA | SO3 + cont cisaconitat succinate   |
| 3289 | FeCl2      | HSO3        | NA | HSO3 + FeC cisaconitat succinate   |

|      |            |             |    |                                   |
|------|------------|-------------|----|-----------------------------------|
| 3290 | FeCl3      | HSO3        | NA | HSO3 + Fe( cisaconitat succinate  |
| 3291 | Fe(ClO4)2  | HSO3        | NA | HSO3 + Fe( cisaconitat succinate  |
| 3292 | Fe(ClO4)3  | HSO3        | NA | HSO3 + Fe( cisaconitat succinate  |
| 3293 | Fe Sulfide | HSO3        | NA | HSO3 + Fe . cisaconitat succinate |
| 3294 | Fe Acetate | HSO3        | NA | HSO3 + Fe . cisaconitat succinate |
| 3295 | Ferrocene  | HSO3        | NA | HSO3 + Fer cisaconitat succinate  |
| 3296 | control    | HSO3        | NA | HSO3 + cor cisaconitat succinate  |
| 3297 | FeCl2      | DMSO        | NA | DMSO + Fe cisaconitat succinate   |
| 3298 | FeCl3      | DMSO        | NA | DMSO + Fe cisaconitat succinate   |
| 3299 | Fe(ClO4)2  | DMSO        | NA | DMSO + Fe cisaconitat succinate   |
| 3300 | Fe(ClO4)3  | DMSO        | NA | DMSO + Fe cisaconitat succinate   |
| 3301 | Fe Sulfide | DMSO        | NA | DMSO + Fe cisaconitat succinate   |
| 3302 | Fe Acetate | DMSO        | NA | DMSO + Fe cisaconitat succinate   |
| 3303 | Ferrocene  | DMSO        | NA | DMSO + Fe cisaconitat succinate   |
| 3304 | control    | DMSO        | NA | DMSO + co cisaconitat succinate   |
| 3305 | FeCl2      | Cys         | NA | Cys + FeCl2 cisaconitat succinate |
| 3306 | FeCl3      | Cys         | NA | Cys + FeCl3 cisaconitat succinate |
| 3307 | Fe(ClO4)2  | Cys         | NA | Cys + Fe(Cl cisaconitat succinate |
| 3308 | Fe(ClO4)3  | Cys         | NA | Cys + Fe(Cl cisaconitat succinate |
| 3309 | Fe Sulfide | Cys         | NA | Cys + Fe Su cisaconitat succinate |
| 3310 | Fe Acetate | Cys         | NA | Cys + Fe Ac cisaconitat succinate |
| 3311 | Ferrocene  | Cys         | NA | Cys + Ferro cisaconitat succinate |
| 3312 | control    | Cys         | NA | Cys + contr cisaconitat succinate |
| 3313 | FeCl2      | Methionin   | NA | Methionin cisaconitat succinate   |
| 3314 | FeCl3      | Methionin   | NA | Methionin cisaconitat succinate   |
| 3315 | Fe(ClO4)2  | Methionin   | NA | Methionin cisaconitat succinate   |
| 3316 | Fe(ClO4)3  | Methionin   | NA | Methionin cisaconitat succinate   |
| 3317 | Fe Sulfide | Methionin   | NA | Methionin cisaconitat succinate   |
| 3318 | Fe Acetate | Methionin   | NA | Methionin cisaconitat succinate   |
| 3319 | Ferrocene  | Methionin   | NA | Methionin cisaconitat succinate   |
| 3320 | control    | Methionin   | NA | Methionin cisaconitat succinate   |
| 3321 | FeCl2      | Homocyste   | NA | Homocyste cisaconitat succinate   |
| 3322 | FeCl3      | Homocyste   | NA | Homocyste cisaconitat succinate   |
| 3323 | Fe(ClO4)2  | Homocyste   | NA | Homocyste cisaconitat succinate   |
| 3324 | Fe(ClO4)3  | Homocyste   | NA | Homocyste cisaconitat succinate   |
| 3325 | Fe Sulfide | Homocyste   | NA | Homocyste cisaconitat succinate   |
| 3326 | Fe Acetate | Homocyste   | NA | Homocyste cisaconitat succinate   |
| 3327 | Ferrocene  | Homocyste   | NA | Homocyste cisaconitat succinate   |
| 3328 | control    | Homocyste   | NA | Homocyste cisaconitat succinate   |
| 3329 | FeCl2      | DL-Ethionir | NA | DL-Ethionir cisaconitat succinate |
| 3330 | FeCl3      | DL-Ethionir | NA | DL-Ethionir cisaconitat succinate |
| 3331 | Fe(ClO4)2  | DL-Ethionir | NA | DL-Ethionir cisaconitat succinate |
| 3332 | Fe(ClO4)3  | DL-Ethionir | NA | DL-Ethionir cisaconitat succinate |
| 3333 | Fe Sulfide | DL-Ethionir | NA | DL-Ethionir cisaconitat succinate |
| 3334 | Fe Acetate | DL-Ethionir | NA | DL-Ethionir cisaconitat succinate |
| 3335 | Ferrocene  | DL-Ethionir | NA | DL-Ethionir cisaconitat succinate |
| 3336 | control    | DL-Ethionir | NA | DL-Ethionir cisaconitat succinate |

|      |                                    |                               |    |                                      |             |           |
|------|------------------------------------|-------------------------------|----|--------------------------------------|-------------|-----------|
| 3337 | FeCl <sub>2</sub>                  | 2-Mercapt                     | NA | 2-Mercapt                            | cisaconitat | succinate |
| 3338 | FeCl <sub>3</sub>                  | 2-Mercapt                     | NA | 2-Mercapt                            | cisaconitat | succinate |
| 3339 | Fe(ClO <sub>4</sub> ) <sub>2</sub> | 2-Mercapt                     | NA | 2-Mercapt                            | cisaconitat | succinate |
| 3340 | Fe(ClO <sub>4</sub> ) <sub>3</sub> | 2-Mercapt                     | NA | 2-Mercapt                            | cisaconitat | succinate |
| 3341 | Fe Sulfide                         | 2-Mercapt                     | NA | 2-Mercapt                            | cisaconitat | succinate |
| 3342 | Fe Acetate                         | 2-Mercapt                     | NA | 2-Mercapt                            | cisaconitat | succinate |
| 3343 | Ferrocene                          | 2-Mercapt                     | NA | 2-Mercapt                            | cisaconitat | succinate |
| 3344 | control                            | 2-Mercapt                     | NA | 2-Mercapt                            | cisaconitat | succinate |
| 3345 | FeCl <sub>2</sub>                  | S <sub>2</sub> O <sub>8</sub> | NA | S <sub>2</sub> O <sub>8</sub> + FeC  | citrate     | succinate |
| 3346 | FeCl <sub>3</sub>                  | S <sub>2</sub> O <sub>8</sub> | NA | S <sub>2</sub> O <sub>8</sub> + FeC  | citrate     | succinate |
| 3347 | Fe(ClO <sub>4</sub> ) <sub>2</sub> | S <sub>2</sub> O <sub>8</sub> | NA | S <sub>2</sub> O <sub>8</sub> + Fe(C | citrate     | succinate |
| 3348 | Fe(ClO <sub>4</sub> ) <sub>3</sub> | S <sub>2</sub> O <sub>8</sub> | NA | S <sub>2</sub> O <sub>8</sub> + Fe(C | citrate     | succinate |
| 3349 | Fe Sulfide                         | S <sub>2</sub> O <sub>8</sub> | NA | S <sub>2</sub> O <sub>8</sub> + Fe S | citrate     | succinate |
| 3350 | Fe Acetate                         | S <sub>2</sub> O <sub>8</sub> | NA | S <sub>2</sub> O <sub>8</sub> + Fe A | citrate     | succinate |
| 3351 | Ferrocene                          | S <sub>2</sub> O <sub>8</sub> | NA | S <sub>2</sub> O <sub>8</sub> + Fer  | citrate     | succinate |
| 3352 | control                            | S <sub>2</sub> O <sub>8</sub> | NA | S <sub>2</sub> O <sub>8</sub> + con  | citrate     | succinate |
| 3353 | FeCl <sub>2</sub>                  | control                       | NA | control + F                          | citrate     | succinate |
| 3354 | FeCl <sub>3</sub>                  | control                       | NA | control + F                          | citrate     | succinate |
| 3355 | Fe(ClO <sub>4</sub> ) <sub>2</sub> | control                       | NA | control + F                          | citrate     | succinate |
| 3356 | Fe(ClO <sub>4</sub> ) <sub>3</sub> | control                       | NA | control + F                          | citrate     | succinate |
| 3357 | Fe Sulfide                         | control                       | NA | control + F                          | citrate     | succinate |
| 3358 | Fe Acetate                         | control                       | NA | control + F                          | citrate     | succinate |
| 3359 | Ferrocene                          | control                       | NA | control + F                          | citrate     | succinate |
| 3360 | control                            | control                       | NA | control + c                          | citrate     | succinate |
| 3361 | FeCl <sub>2</sub>                  | SO <sub>4</sub>               | NA | SO <sub>4</sub> + FeCl               | citrate     | succinate |
| 3362 | FeCl <sub>3</sub>                  | SO <sub>4</sub>               | NA | SO <sub>4</sub> + FeCl               | citrate     | succinate |
| 3363 | Fe(ClO <sub>4</sub> ) <sub>2</sub> | SO <sub>4</sub>               | NA | SO <sub>4</sub> + Fe(C               | citrate     | succinate |
| 3364 | Fe(ClO <sub>4</sub> ) <sub>3</sub> | SO <sub>4</sub>               | NA | SO <sub>4</sub> + Fe(C               | citrate     | succinate |
| 3365 | Fe Sulfide                         | SO <sub>4</sub>               | NA | SO <sub>4</sub> + Fe S               | citrate     | succinate |
| 3366 | Fe Acetate                         | SO <sub>4</sub>               | NA | SO <sub>4</sub> + Fe A               | citrate     | succinate |
| 3367 | Ferrocene                          | SO <sub>4</sub>               | NA | SO <sub>4</sub> + Ferr               | citrate     | succinate |
| 3368 | control                            | SO <sub>4</sub>               | NA | SO <sub>4</sub> + cont               | citrate     | succinate |
| 3369 | FeCl <sub>2</sub>                  | SO <sub>3</sub>               | NA | SO <sub>3</sub> + FeCl               | citrate     | succinate |
| 3370 | FeCl <sub>3</sub>                  | SO <sub>3</sub>               | NA | SO <sub>3</sub> + FeCl               | citrate     | succinate |
| 3371 | Fe(ClO <sub>4</sub> ) <sub>2</sub> | SO <sub>3</sub>               | NA | SO <sub>3</sub> + Fe(C               | citrate     | succinate |
| 3372 | Fe(ClO <sub>4</sub> ) <sub>3</sub> | SO <sub>3</sub>               | NA | SO <sub>3</sub> + Fe(C               | citrate     | succinate |
| 3373 | Fe Sulfide                         | SO <sub>3</sub>               | NA | SO <sub>3</sub> + Fe S               | citrate     | succinate |
| 3374 | Fe Acetate                         | SO <sub>3</sub>               | NA | SO <sub>3</sub> + Fe A               | citrate     | succinate |
| 3375 | Ferrocene                          | SO <sub>3</sub>               | NA | SO <sub>3</sub> + Ferr               | citrate     | succinate |
| 3376 | control                            | SO <sub>3</sub>               | NA | SO <sub>3</sub> + cont               | citrate     | succinate |
| 3377 | FeCl <sub>2</sub>                  | HSO <sub>3</sub>              | NA | HSO <sub>3</sub> + FeC               | citrate     | succinate |
| 3378 | FeCl <sub>3</sub>                  | HSO <sub>3</sub>              | NA | HSO <sub>3</sub> + FeC               | citrate     | succinate |
| 3379 | Fe(ClO <sub>4</sub> ) <sub>2</sub> | HSO <sub>3</sub>              | NA | HSO <sub>3</sub> + Fe(               | citrate     | succinate |
| 3380 | Fe(ClO <sub>4</sub> ) <sub>3</sub> | HSO <sub>3</sub>              | NA | HSO <sub>3</sub> + Fe(               | citrate     | succinate |
| 3381 | Fe Sulfide                         | HSO <sub>3</sub>              | NA | HSO <sub>3</sub> + Fe S              | citrate     | succinate |
| 3382 | Fe Acetate                         | HSO <sub>3</sub>              | NA | HSO <sub>3</sub> + Fe A              | citrate     | succinate |
| 3383 | Ferrocene                          | HSO <sub>3</sub>              | NA | HSO <sub>3</sub> + Fer               | citrate     | succinate |



|      |            |             |    |                     |           |
|------|------------|-------------|----|---------------------|-----------|
| 3384 | control    | HSO3        | NA | HSO3 + cor citrate  | succinate |
| 3385 | FeCl2      | DMSO        | NA | DMSO + Fe citrate   | succinate |
| 3386 | FeCl3      | DMSO        | NA | DMSO + Fe citrate   | succinate |
| 3387 | Fe(ClO4)2  | DMSO        | NA | DMSO + Fe citrate   | succinate |
| 3388 | Fe(ClO4)3  | DMSO        | NA | DMSO + Fe citrate   | succinate |
| 3389 | Fe Sulfide | DMSO        | NA | DMSO + Fe citrate   | succinate |
| 3390 | Fe Acetate | DMSO        | NA | DMSO + Fe citrate   | succinate |
| 3391 | Ferrocene  | DMSO        | NA | DMSO + Fe citrate   | succinate |
| 3392 | control    | DMSO        | NA | DMSO + co citrate   | succinate |
| 3393 | FeCl2      | Cys         | NA | Cys + FeCl2 citrate | succinate |
| 3394 | FeCl3      | Cys         | NA | Cys + FeCl3 citrate | succinate |
| 3395 | Fe(ClO4)2  | Cys         | NA | Cys + Fe(Cl citrate | succinate |
| 3396 | Fe(ClO4)3  | Cys         | NA | Cys + Fe(Cl citrate | succinate |
| 3397 | Fe Sulfide | Cys         | NA | Cys + Fe Su citrate | succinate |
| 3398 | Fe Acetate | Cys         | NA | Cys + Fe Ac citrate | succinate |
| 3399 | Ferrocene  | Cys         | NA | Cys + Ferro citrate | succinate |
| 3400 | control    | Cys         | NA | Cys + contr citrate | succinate |
| 3401 | FeCl2      | Methionin   | NA | Methionin citrate   | succinate |
| 3402 | FeCl3      | Methionin   | NA | Methionin citrate   | succinate |
| 3403 | Fe(ClO4)2  | Methionin   | NA | Methionin citrate   | succinate |
| 3404 | Fe(ClO4)3  | Methionin   | NA | Methionin citrate   | succinate |
| 3405 | Fe Sulfide | Methionin   | NA | Methionin citrate   | succinate |
| 3406 | Fe Acetate | Methionin   | NA | Methionin citrate   | succinate |
| 3407 | Ferrocene  | Methionin   | NA | Methionin citrate   | succinate |
| 3408 | control    | Methionin   | NA | Methionin citrate   | succinate |
| 3409 | FeCl2      | Homocyste   | NA | Homocyste citrate   | succinate |
| 3410 | FeCl3      | Homocyste   | NA | Homocyste citrate   | succinate |
| 3411 | Fe(ClO4)2  | Homocyste   | NA | Homocyste citrate   | succinate |
| 3412 | Fe(ClO4)3  | Homocyste   | NA | Homocyste citrate   | succinate |
| 3413 | Fe Sulfide | Homocyste   | NA | Homocyste citrate   | succinate |
| 3414 | Fe Acetate | Homocyste   | NA | Homocyste citrate   | succinate |
| 3415 | Ferrocene  | Homocyste   | NA | Homocyste citrate   | succinate |
| 3416 | control    | Homocyste   | NA | Homocyste citrate   | succinate |
| 3417 | FeCl2      | DL-Ethionir | NA | DL-Ethionir citrate | succinate |
| 3418 | FeCl3      | DL-Ethionir | NA | DL-Ethionir citrate | succinate |
| 3419 | Fe(ClO4)2  | DL-Ethionir | NA | DL-Ethionir citrate | succinate |
| 3420 | Fe(ClO4)3  | DL-Ethionir | NA | DL-Ethionir citrate | succinate |
| 3421 | Fe Sulfide | DL-Ethionir | NA | DL-Ethionir citrate | succinate |
| 3422 | Fe Acetate | DL-Ethionir | NA | DL-Ethionir citrate | succinate |
| 3423 | Ferrocene  | DL-Ethionir | NA | DL-Ethionir citrate | succinate |
| 3424 | control    | DL-Ethionir | NA | DL-Ethionir citrate | succinate |
| 3425 | FeCl2      | 2-Mercapt   | NA | 2-Mercapt citrate   | succinate |
| 3426 | FeCl3      | 2-Mercapt   | NA | 2-Mercapt citrate   | succinate |
| 3427 | Fe(ClO4)2  | 2-Mercapt   | NA | 2-Mercapt citrate   | succinate |
| 3428 | Fe(ClO4)3  | 2-Mercapt   | NA | 2-Mercapt citrate   | succinate |
| 3429 | Fe Sulfide | 2-Mercapt   | NA | 2-Mercapt citrate   | succinate |
| 3430 | Fe Acetate | 2-Mercapt   | NA | 2-Mercapt citrate   | succinate |

|      |                                    |                               |     |                                     |          |           |
|------|------------------------------------|-------------------------------|-----|-------------------------------------|----------|-----------|
| 3431 | Ferrocene                          | 2-Mercapt                     | NA  | 2-Mercapt                           | citrate  | succinate |
| 3432 | control                            | 2-Mercapt                     | NA  | 2-Mercapt                           | citrate  | succinate |
| 3433 | FeCl <sub>2</sub>                  | S <sub>2</sub> O <sub>8</sub> | NA  | S <sub>2</sub> O <sub>8</sub> + FeC | fumarate | succinate |
| 3434 | FeCl <sub>3</sub>                  | S <sub>2</sub> O <sub>8</sub> | NA  | S <sub>2</sub> O <sub>8</sub> + FeC | fumarate | succinate |
| 3435 | Fe(ClO <sub>4</sub> ) <sub>2</sub> | S <sub>2</sub> O <sub>8</sub> | NA  | S <sub>2</sub> O <sub>8</sub> + Fe( | fumarate | succinate |
| 3436 | Fe(ClO <sub>4</sub> ) <sub>3</sub> | S <sub>2</sub> O <sub>8</sub> | NA  | S <sub>2</sub> O <sub>8</sub> + Fe( | fumarate | succinate |
| 3437 | Fe Sulfide                         | S <sub>2</sub> O <sub>8</sub> | NA  | S <sub>2</sub> O <sub>8</sub> + Fe  | fumarate | succinate |
| 3438 | Fe Acetate                         | S <sub>2</sub> O <sub>8</sub> | NA  | S <sub>2</sub> O <sub>8</sub> + Fe  | fumarate | succinate |
| 3439 | Ferrocene                          | S <sub>2</sub> O <sub>8</sub> | Inf | S <sub>2</sub> O <sub>8</sub> + Fer | fumarate | succinate |
| 3440 | control                            | S <sub>2</sub> O <sub>8</sub> | Inf | S <sub>2</sub> O <sub>8</sub> + con | fumarate | succinate |
| 3441 | FeCl <sub>2</sub>                  | control                       | NA  | control + F                         | fumarate | succinate |
| 3442 | FeCl <sub>3</sub>                  | control                       | NA  | control + F                         | fumarate | succinate |
| 3443 | Fe(ClO <sub>4</sub> ) <sub>2</sub> | control                       | NA  | control + F                         | fumarate | succinate |
| 3444 | Fe(ClO <sub>4</sub> ) <sub>3</sub> | control                       | NA  | control + F                         | fumarate | succinate |
| 3445 | Fe Sulfide                         | control                       | NA  | control + F                         | fumarate | succinate |
| 3446 | Fe Acetate                         | control                       | NA  | control + F                         | fumarate | succinate |
| 3447 | Ferrocene                          | control                       | NA  | control + F                         | fumarate | succinate |
| 3448 | control                            | control                       | NA  | control + c                         | fumarate | succinate |
| 3449 | FeCl <sub>2</sub>                  | SO <sub>4</sub>               | NA  | SO <sub>4</sub> + FeCl              | fumarate | succinate |
| 3450 | FeCl <sub>3</sub>                  | SO <sub>4</sub>               | NA  | SO <sub>4</sub> + FeCl              | fumarate | succinate |
| 3451 | Fe(ClO <sub>4</sub> ) <sub>2</sub> | SO <sub>4</sub>               | NA  | SO <sub>4</sub> + Fe(C              | fumarate | succinate |
| 3452 | Fe(ClO <sub>4</sub> ) <sub>3</sub> | SO <sub>4</sub>               | NA  | SO <sub>4</sub> + Fe(C              | fumarate | succinate |
| 3453 | Fe Sulfide                         | SO <sub>4</sub>               | NA  | SO <sub>4</sub> + Fe S              | fumarate | succinate |
| 3454 | Fe Acetate                         | SO <sub>4</sub>               | NA  | SO <sub>4</sub> + Fe A              | fumarate | succinate |
| 3455 | Ferrocene                          | SO <sub>4</sub>               | NA  | SO <sub>4</sub> + Ferr              | fumarate | succinate |
| 3456 | control                            | SO <sub>4</sub>               | NA  | SO <sub>4</sub> + cont              | fumarate | succinate |
| 3457 | FeCl <sub>2</sub>                  | SO <sub>3</sub>               | NA  | SO <sub>3</sub> + FeCl              | fumarate | succinate |
| 3458 | FeCl <sub>3</sub>                  | SO <sub>3</sub>               | NA  | SO <sub>3</sub> + FeCl              | fumarate | succinate |
| 3459 | Fe(ClO <sub>4</sub> ) <sub>2</sub> | SO <sub>3</sub>               | NA  | SO <sub>3</sub> + Fe(C              | fumarate | succinate |
| 3460 | Fe(ClO <sub>4</sub> ) <sub>3</sub> | SO <sub>3</sub>               | NA  | SO <sub>3</sub> + Fe(C              | fumarate | succinate |
| 3461 | Fe Sulfide                         | SO <sub>3</sub>               | NA  | SO <sub>3</sub> + Fe S              | fumarate | succinate |
| 3462 | Fe Acetate                         | SO <sub>3</sub>               | NA  | SO <sub>3</sub> + Fe A              | fumarate | succinate |
| 3463 | Ferrocene                          | SO <sub>3</sub>               | NA  | SO <sub>3</sub> + Ferr              | fumarate | succinate |
| 3464 | control                            | SO <sub>3</sub>               | NA  | SO <sub>3</sub> + cont              | fumarate | succinate |
| 3465 | FeCl <sub>2</sub>                  | HSO <sub>3</sub>              | NA  | HSO <sub>3</sub> + FeC              | fumarate | succinate |
| 3466 | FeCl <sub>3</sub>                  | HSO <sub>3</sub>              | NA  | HSO <sub>3</sub> + FeC              | fumarate | succinate |
| 3467 | Fe(ClO <sub>4</sub> ) <sub>2</sub> | HSO <sub>3</sub>              | NA  | HSO <sub>3</sub> + Fe(              | fumarate | succinate |
| 3468 | Fe(ClO <sub>4</sub> ) <sub>3</sub> | HSO <sub>3</sub>              | NA  | HSO <sub>3</sub> + Fe(              | fumarate | succinate |
| 3469 | Fe Sulfide                         | HSO <sub>3</sub>              | NA  | HSO <sub>3</sub> + Fe               | fumarate | succinate |
| 3470 | Fe Acetate                         | HSO <sub>3</sub>              | NA  | HSO <sub>3</sub> + Fe               | fumarate | succinate |
| 3471 | Ferrocene                          | HSO <sub>3</sub>              | NA  | HSO <sub>3</sub> + Fer              | fumarate | succinate |
| 3472 | control                            | HSO <sub>3</sub>              | NA  | HSO <sub>3</sub> + cor              | fumarate | succinate |
| 3473 | FeCl <sub>2</sub>                  | DMSO                          | NA  | DMSO + Fe                           | fumarate | succinate |
| 3474 | FeCl <sub>3</sub>                  | DMSO                          | NA  | DMSO + Fe                           | fumarate | succinate |
| 3475 | Fe(ClO <sub>4</sub> ) <sub>2</sub> | DMSO                          | NA  | DMSO + Fe                           | fumarate | succinate |
| 3476 | Fe(ClO <sub>4</sub> ) <sub>3</sub> | DMSO                          | NA  | DMSO + Fe                           | fumarate | succinate |
| 3477 | Fe Sulfide                         | DMSO                          | NA  | DMSO + Fe                           | fumarate | succinate |

|      |                                    |             |    |                                  |           |
|------|------------------------------------|-------------|----|----------------------------------|-----------|
| 3478 | Fe Acetate                         | DMSO        | NA | DMSO + Fe fumarate               | succinate |
| 3479 | Ferrocene                          | DMSO        | NA | DMSO + Fe fumarate               | succinate |
| 3480 | control                            | DMSO        | NA | DMSO + co fumarate               | succinate |
| 3481 | FeCl <sub>2</sub>                  | Cys         | NA | Cys + FeCl <sub>2</sub> fumarate | succinate |
| 3482 | FeCl <sub>3</sub>                  | Cys         | NA | Cys + FeCl <sub>3</sub> fumarate | succinate |
| 3483 | Fe(ClO <sub>4</sub> ) <sub>2</sub> | Cys         | NA | Cys + Fe(Cl fumarate             | succinate |
| 3484 | Fe(ClO <sub>4</sub> ) <sub>3</sub> | Cys         | NA | Cys + Fe(Cl fumarate             | succinate |
| 3485 | Fe Sulfide                         | Cys         | NA | Cys + Fe Su fumarate             | succinate |
| 3486 | Fe Acetate                         | Cys         | NA | Cys + Fe Ac fumarate             | succinate |
| 3487 | Ferrocene                          | Cys         | NA | Cys + Ferro fumarate             | succinate |
| 3488 | control                            | Cys         | NA | Cys + contr fumarate             | succinate |
| 3489 | FeCl <sub>2</sub>                  | Methionin   | NA | Methionin fumarate               | succinate |
| 3490 | FeCl <sub>3</sub>                  | Methionin   | NA | Methionin fumarate               | succinate |
| 3491 | Fe(ClO <sub>4</sub> ) <sub>2</sub> | Methionin   | NA | Methionin fumarate               | succinate |
| 3492 | Fe(ClO <sub>4</sub> ) <sub>3</sub> | Methionin   | NA | Methionin fumarate               | succinate |
| 3493 | Fe Sulfide                         | Methionin   | NA | Methionin fumarate               | succinate |
| 3494 | Fe Acetate                         | Methionin   | NA | Methionin fumarate               | succinate |
| 3495 | Ferrocene                          | Methionin   | NA | Methionin fumarate               | succinate |
| 3496 | control                            | Methionin   | NA | Methionin fumarate               | succinate |
| 3497 | FeCl <sub>2</sub>                  | Homocyste   | NA | Homocyste fumarate               | succinate |
| 3498 | FeCl <sub>3</sub>                  | Homocyste   | NA | Homocyste fumarate               | succinate |
| 3499 | Fe(ClO <sub>4</sub> ) <sub>2</sub> | Homocyste   | NA | Homocyste fumarate               | succinate |
| 3500 | Fe(ClO <sub>4</sub> ) <sub>3</sub> | Homocyste   | NA | Homocyste fumarate               | succinate |
| 3501 | Fe Sulfide                         | Homocyste   | NA | Homocyste fumarate               | succinate |
| 3502 | Fe Acetate                         | Homocyste   | NA | Homocyste fumarate               | succinate |
| 3503 | Ferrocene                          | Homocyste   | NA | Homocyste fumarate               | succinate |
| 3504 | control                            | Homocyste   | NA | Homocyste fumarate               | succinate |
| 3505 | FeCl <sub>2</sub>                  | DL-Ethionir | NA | DL-Ethionir fumarate             | succinate |
| 3506 | FeCl <sub>3</sub>                  | DL-Ethionir | NA | DL-Ethionir fumarate             | succinate |
| 3507 | Fe(ClO <sub>4</sub> ) <sub>2</sub> | DL-Ethionir | NA | DL-Ethionir fumarate             | succinate |
| 3508 | Fe(ClO <sub>4</sub> ) <sub>3</sub> | DL-Ethionir | NA | DL-Ethionir fumarate             | succinate |
| 3509 | Fe Sulfide                         | DL-Ethionir | NA | DL-Ethionir fumarate             | succinate |
| 3510 | Fe Acetate                         | DL-Ethionir | NA | DL-Ethionir fumarate             | succinate |
| 3511 | Ferrocene                          | DL-Ethionir | NA | DL-Ethionir fumarate             | succinate |
| 3512 | control                            | DL-Ethionir | NA | DL-Ethionir fumarate             | succinate |
| 3513 | FeCl <sub>2</sub>                  | 2-Mercapt   | NA | 2-Mercapt fumarate               | succinate |
| 3514 | FeCl <sub>3</sub>                  | 2-Mercapt   | NA | 2-Mercapt fumarate               | succinate |
| 3515 | Fe(ClO <sub>4</sub> ) <sub>2</sub> | 2-Mercapt   | NA | 2-Mercapt fumarate               | succinate |
| 3516 | Fe(ClO <sub>4</sub> ) <sub>3</sub> | 2-Mercapt   | NA | 2-Mercapt fumarate               | succinate |
| 3517 | Fe Sulfide                         | 2-Mercapt   | NA | 2-Mercapt fumarate               | succinate |
| 3518 | Fe Acetate                         | 2-Mercapt   | NA | 2-Mercapt fumarate               | succinate |
| 3519 | Ferrocene                          | 2-Mercapt   | NA | 2-Mercapt fumarate               | succinate |
| 3520 | control                            | 2-Mercapt   | NA | 2-Mercapt fumarate               | succinate |
| 3521 | FeCl <sub>2</sub>                  | S2O8        | NA | S2O8 + FeC malate                | succinate |
| 3522 | FeCl <sub>3</sub>                  | S2O8        | NA | S2O8 + FeC malate                | succinate |
| 3523 | Fe(ClO <sub>4</sub> ) <sub>2</sub> | S2O8        | NA | S2O8 + Fe(i malate               | succinate |
| 3524 | Fe(ClO <sub>4</sub> ) <sub>3</sub> | S2O8        | NA | S2O8 + Fe(i malate               | succinate |

|      |            |         |    |             |        |           |
|------|------------|---------|----|-------------|--------|-----------|
| 3525 | Fe Sulfide | S2O8    | NA | S2O8 + Fe   | malate | succinate |
| 3526 | Fe Acetate | S2O8    | NA | S2O8 + Fe   | malate | succinate |
| 3527 | Ferrocene  | S2O8    | NA | S2O8 + Fer  | malate | succinate |
| 3528 | control    | S2O8    | NA | S2O8 + con  | malate | succinate |
| 3529 | FeCl2      | control | NA | control + F | malate | succinate |
| 3530 | FeCl3      | control | NA | control + F | malate | succinate |
| 3531 | Fe(ClO4)2  | control | NA | control + F | malate | succinate |
| 3532 | Fe(ClO4)3  | control | NA | control + F | malate | succinate |
| 3533 | Fe Sulfide | control | NA | control + F | malate | succinate |
| 3534 | Fe Acetate | control | NA | control + F | malate | succinate |
| 3535 | Ferrocene  | control | NA | control + F | malate | succinate |
| 3536 | control    | control | NA | control + c | malate | succinate |
| 3537 | FeCl2      | SO4     | NA | SO4 + FeCl  | malate | succinate |
| 3538 | FeCl3      | SO4     | NA | SO4 + FeCl  | malate | succinate |
| 3539 | Fe(ClO4)2  | SO4     | NA | SO4 + Fe(C  | malate | succinate |
| 3540 | Fe(ClO4)3  | SO4     | NA | SO4 + Fe(C  | malate | succinate |
| 3541 | Fe Sulfide | SO4     | NA | SO4 + Fe S  | malate | succinate |
| 3542 | Fe Acetate | SO4     | NA | SO4 + Fe A  | malate | succinate |
| 3543 | Ferrocene  | SO4     | NA | SO4 + Ferr  | malate | succinate |
| 3544 | control    | SO4     | NA | SO4 + cont  | malate | succinate |
| 3545 | FeCl2      | SO3     | NA | SO3 + FeCl  | malate | succinate |
| 3546 | FeCl3      | SO3     | NA | SO3 + FeCl  | malate | succinate |
| 3547 | Fe(ClO4)2  | SO3     | NA | SO3 + Fe(C  | malate | succinate |
| 3548 | Fe(ClO4)3  | SO3     | NA | SO3 + Fe(C  | malate | succinate |
| 3549 | Fe Sulfide | SO3     | NA | SO3 + Fe S  | malate | succinate |
| 3550 | Fe Acetate | SO3     | NA | SO3 + Fe A  | malate | succinate |
| 3551 | Ferrocene  | SO3     | NA | SO3 + Ferr  | malate | succinate |
| 3552 | control    | SO3     | NA | SO3 + cont  | malate | succinate |
| 3553 | FeCl2      | HSO3    | NA | HSO3 + Fe   | malate | succinate |
| 3554 | FeCl3      | HSO3    | NA | HSO3 + Fe   | malate | succinate |
| 3555 | Fe(ClO4)2  | HSO3    | NA | HSO3 + Fe   | malate | succinate |
| 3556 | Fe(ClO4)3  | HSO3    | NA | HSO3 + Fe   | malate | succinate |
| 3557 | Fe Sulfide | HSO3    | NA | HSO3 + Fe   | malate | succinate |
| 3558 | Fe Acetate | HSO3    | NA | HSO3 + Fe   | malate | succinate |
| 3559 | Ferrocene  | HSO3    | NA | HSO3 + Fer  | malate | succinate |
| 3560 | control    | HSO3    | NA | HSO3 + cor  | malate | succinate |
| 3561 | FeCl2      | DMSO    | NA | DMSO + Fe   | malate | succinate |
| 3562 | FeCl3      | DMSO    | NA | DMSO + Fe   | malate | succinate |
| 3563 | Fe(ClO4)2  | DMSO    | NA | DMSO + Fe   | malate | succinate |
| 3564 | Fe(ClO4)3  | DMSO    | NA | DMSO + Fe   | malate | succinate |
| 3565 | Fe Sulfide | DMSO    | NA | DMSO + Fe   | malate | succinate |
| 3566 | Fe Acetate | DMSO    | NA | DMSO + Fe   | malate | succinate |
| 3567 | Ferrocene  | DMSO    | NA | DMSO + Fe   | malate | succinate |
| 3568 | control    | DMSO    | NA | DMSO + co   | malate | succinate |
| 3569 | FeCl2      | Cys     | NA | Cys + FeCl2 | malate | succinate |
| 3570 | FeCl3      | Cys     | NA | Cys + FeCl3 | malate | succinate |
| 3571 | Fe(ClO4)2  | Cys     | NA | Cys + Fe(Cl | malate | succinate |

|      |            |             |     |                         |           |
|------|------------|-------------|-----|-------------------------|-----------|
| 3572 | Fe(ClO4)3  | Cys         | NA  | Cys + Fe(Cl malate      | succinate |
| 3573 | Fe Sulfide | Cys         | NA  | Cys + Fe Su malate      | succinate |
| 3574 | Fe Acetate | Cys         | NA  | Cys + Fe Ac malate      | succinate |
| 3575 | Ferrocene  | Cys         | NA  | Cys + Ferro malate      | succinate |
| 3576 | control    | Cys         | NA  | Cys + contr malate      | succinate |
| 3577 | FeCl2      | Methionin   | NA  | Methionin malate        | succinate |
| 3578 | FeCl3      | Methionin   | NA  | Methionin malate        | succinate |
| 3579 | Fe(ClO4)2  | Methionin   | NA  | Methionin malate        | succinate |
| 3580 | Fe(ClO4)3  | Methionin   | NA  | Methionin malate        | succinate |
| 3581 | Fe Sulfide | Methionin   | NA  | Methionin malate        | succinate |
| 3582 | Fe Acetate | Methionin   | NA  | Methionin malate        | succinate |
| 3583 | Ferrocene  | Methionin   | NA  | Methionin malate        | succinate |
| 3584 | control    | Methionin   | NA  | Methionin malate        | succinate |
| 3585 | FeCl2      | Homocyste   | NA  | Homocyste malate        | succinate |
| 3586 | FeCl3      | Homocyste   | NA  | Homocyste malate        | succinate |
| 3587 | Fe(ClO4)2  | Homocyste   | NA  | Homocyste malate        | succinate |
| 3588 | Fe(ClO4)3  | Homocyste   | NA  | Homocyste malate        | succinate |
| 3589 | Fe Sulfide | Homocyste   | NA  | Homocyste malate        | succinate |
| 3590 | Fe Acetate | Homocyste   | NA  | Homocyste malate        | succinate |
| 3591 | Ferrocene  | Homocyste   | NA  | Homocyste malate        | succinate |
| 3592 | control    | Homocyste   | NA  | Homocyste malate        | succinate |
| 3593 | FeCl2      | DL-Ethionir | NA  | DL-Ethionir malate      | succinate |
| 3594 | FeCl3      | DL-Ethionir | NA  | DL-Ethionir malate      | succinate |
| 3595 | Fe(ClO4)2  | DL-Ethionir | NA  | DL-Ethionir malate      | succinate |
| 3596 | Fe(ClO4)3  | DL-Ethionir | NA  | DL-Ethionir malate      | succinate |
| 3597 | Fe Sulfide | DL-Ethionir | NA  | DL-Ethionir malate      | succinate |
| 3598 | Fe Acetate | DL-Ethionir | NA  | DL-Ethionir malate      | succinate |
| 3599 | Ferrocene  | DL-Ethionir | NA  | DL-Ethionir malate      | succinate |
| 3600 | control    | DL-Ethionir | NA  | DL-Ethionir malate      | succinate |
| 3601 | FeCl2      | 2-Mercapt   | NA  | 2-Mercapt malate        | succinate |
| 3602 | FeCl3      | 2-Mercapt   | NA  | 2-Mercapt malate        | succinate |
| 3603 | Fe(ClO4)2  | 2-Mercapt   | NA  | 2-Mercapt malate        | succinate |
| 3604 | Fe(ClO4)3  | 2-Mercapt   | NA  | 2-Mercapt malate        | succinate |
| 3605 | Fe Sulfide | 2-Mercapt   | NA  | 2-Mercapt malate        | succinate |
| 3606 | Fe Acetate | 2-Mercapt   | NA  | 2-Mercapt malate        | succinate |
| 3607 | Ferrocene  | 2-Mercapt   | NA  | 2-Mercapt malate        | succinate |
| 3608 | control    | 2-Mercapt   | NA  | 2-Mercapt malate        | succinate |
| 3609 | FeCl2      | S2O8        | NA  | S2O8 + FeC oxaloaceta   | succinate |
| 3610 | FeCl3      | S2O8        | Inf | S2O8 + FeC oxaloaceta   | succinate |
| 3611 | Fe(ClO4)2  | S2O8        | Inf | S2O8 + Fe( oxaloaceta   | succinate |
| 3612 | Fe(ClO4)3  | S2O8        | Inf | S2O8 + Fe( oxaloaceta   | succinate |
| 3613 | Fe Sulfide | S2O8        | Inf | S2O8 + Fe ! oxaloaceta  | succinate |
| 3614 | Fe Acetate | S2O8        | NA  | S2O8 + Fe , oxaloaceta  | succinate |
| 3615 | Ferrocene  | S2O8        | Inf | S2O8 + Fer oxaloaceta   | succinate |
| 3616 | control    | S2O8        | Inf | S2O8 + con oxaloaceta   | succinate |
| 3617 | FeCl2      | control     | NA  | control + Fi oxaloaceta | succinate |
| 3618 | FeCl3      | control     | NA  | control + Fi oxaloaceta | succinate |

|      |            |            |    |                                         |
|------|------------|------------|----|-----------------------------------------|
| 3619 | Fe(CIO4)2  | control    | NA | control + Fe oxaloaceta succinate       |
| 3620 | Fe(CIO4)3  | control    | NA | control + Fe oxaloaceta succinate       |
| 3621 | Fe Sulfide | control    | NA | control + Fe oxaloaceta succinate       |
| 3622 | Fe Acetate | control    | NA | control + Fe oxaloaceta succinate       |
| 3623 | Ferrocene  | control    | NA | control + Fe oxaloaceta succinate       |
| 3624 | control    | control    | NA | control + Fe oxaloaceta succinate       |
| 3625 | FeCl2      | SO4        | NA | SO4 + FeCl2 oxaloaceta succinate        |
| 3626 | FeCl3      | SO4        | NA | SO4 + FeCl3 oxaloaceta succinate        |
| 3627 | Fe(CIO4)2  | SO4        | NA | SO4 + Fe(CIO4)2 oxaloaceta succinate    |
| 3628 | Fe(CIO4)3  | SO4        | NA | SO4 + Fe(CIO4)3 oxaloaceta succinate    |
| 3629 | Fe Sulfide | SO4        | NA | SO4 + Fe Sulfide oxaloaceta succinate   |
| 3630 | Fe Acetate | SO4        | NA | SO4 + Fe Acetate oxaloaceta succinate   |
| 3631 | Ferrocene  | SO4        | NA | SO4 + Ferrocene oxaloaceta succinate    |
| 3632 | control    | SO4        | NA | SO4 + control oxaloaceta succinate      |
| 3633 | FeCl2      | SO3        | NA | SO3 + FeCl2 oxaloaceta succinate        |
| 3634 | FeCl3      | SO3        | NA | SO3 + FeCl3 oxaloaceta succinate        |
| 3635 | Fe(CIO4)2  | SO3        | NA | SO3 + Fe(CIO4)2 oxaloaceta succinate    |
| 3636 | Fe(CIO4)3  | SO3        | NA | SO3 + Fe(CIO4)3 oxaloaceta succinate    |
| 3637 | Fe Sulfide | SO3        | NA | SO3 + Fe Sulfide oxaloaceta succinate   |
| 3638 | Fe Acetate | SO3        | NA | SO3 + Fe Acetate oxaloaceta succinate   |
| 3639 | Ferrocene  | SO3        | NA | SO3 + Ferrocene oxaloaceta succinate    |
| 3640 | control    | SO3        | NA | SO3 + control oxaloaceta succinate      |
| 3641 | FeCl2      | HSO3       | NA | HSO3 + FeCl2 oxaloaceta succinate       |
| 3642 | FeCl3      | HSO3       | NA | HSO3 + FeCl3 oxaloaceta succinate       |
| 3643 | Fe(CIO4)2  | HSO3       | NA | HSO3 + Fe(CIO4)2 oxaloaceta succinate   |
| 3644 | Fe(CIO4)3  | HSO3       | NA | HSO3 + Fe(CIO4)3 oxaloaceta succinate   |
| 3645 | Fe Sulfide | HSO3       | NA | HSO3 + Fe Sulfide oxaloaceta succinate  |
| 3646 | Fe Acetate | HSO3       | NA | HSO3 + Fe Acetate oxaloaceta succinate  |
| 3647 | Ferrocene  | HSO3       | NA | HSO3 + Ferrocene oxaloaceta succinate   |
| 3648 | control    | HSO3       | NA | HSO3 + control oxaloaceta succinate     |
| 3649 | FeCl2      | DMSO       | NA | DMSO + FeCl2 oxaloaceta succinate       |
| 3650 | FeCl3      | DMSO       | NA | DMSO + FeCl3 oxaloaceta succinate       |
| 3651 | Fe(CIO4)2  | DMSO       | NA | DMSO + Fe(CIO4)2 oxaloaceta succinate   |
| 3652 | Fe(CIO4)3  | DMSO       | NA | DMSO + Fe(CIO4)3 oxaloaceta succinate   |
| 3653 | Fe Sulfide | DMSO       | NA | DMSO + Fe Sulfide oxaloaceta succinate  |
| 3654 | Fe Acetate | DMSO       | NA | DMSO + Fe Acetate oxaloaceta succinate  |
| 3655 | Ferrocene  | DMSO       | NA | DMSO + Ferrocene oxaloaceta succinate   |
| 3656 | control    | DMSO       | NA | DMSO + control oxaloaceta succinate     |
| 3657 | FeCl2      | Cys        | NA | Cys + FeCl2 oxaloaceta succinate        |
| 3658 | FeCl3      | Cys        | NA | Cys + FeCl3 oxaloaceta succinate        |
| 3659 | Fe(CIO4)2  | Cys        | NA | Cys + Fe(CIO4)2 oxaloaceta succinate    |
| 3660 | Fe(CIO4)3  | Cys        | NA | Cys + Fe(CIO4)3 oxaloaceta succinate    |
| 3661 | Fe Sulfide | Cys        | NA | Cys + Fe Sulfide oxaloaceta succinate   |
| 3662 | Fe Acetate | Cys        | NA | Cys + Fe Acetate oxaloaceta succinate   |
| 3663 | Ferrocene  | Cys        | NA | Cys + Ferrocene oxaloaceta succinate    |
| 3664 | control    | Cys        | NA | Cys + control oxaloaceta succinate      |
| 3665 | FeCl2      | Methionine | NA | Methionine + FeCl2 oxaloaceta succinate |

|      |            |             |          |             |                      |
|------|------------|-------------|----------|-------------|----------------------|
| 3666 | FeCl3      | Methionin   | NA       | Methionin   | oxaloaceta succinate |
| 3667 | Fe(ClO4)2  | Methionin   | NA       | Methionin   | oxaloaceta succinate |
| 3668 | Fe(ClO4)3  | Methionin   | NA       | Methionin   | oxaloaceta succinate |
| 3669 | Fe Sulfide | Methionin   | NA       | Methionin   | oxaloaceta succinate |
| 3670 | Fe Acetate | Methionin   | NA       | Methionin   | oxaloaceta succinate |
| 3671 | Ferrocene  | Methionin   | NA       | Methionin   | oxaloaceta succinate |
| 3672 | control    | Methionin   | NA       | Methionin   | oxaloaceta succinate |
| 3673 | FeCl2      | Homocyste   | NA       | Homocyste   | oxaloaceta succinate |
| 3674 | FeCl3      | Homocyste   | NA       | Homocyste   | oxaloaceta succinate |
| 3675 | Fe(ClO4)2  | Homocyste   | NA       | Homocyste   | oxaloaceta succinate |
| 3676 | Fe(ClO4)3  | Homocyste   | NA       | Homocyste   | oxaloaceta succinate |
| 3677 | Fe Sulfide | Homocyste   | NA       | Homocyste   | oxaloaceta succinate |
| 3678 | Fe Acetate | Homocyste   | NA       | Homocyste   | oxaloaceta succinate |
| 3679 | Ferrocene  | Homocyste   | NA       | Homocyste   | oxaloaceta succinate |
| 3680 | control    | Homocyste   | NA       | Homocyste   | oxaloaceta succinate |
| 3681 | FeCl2      | DL-Ethionir | NA       | DL-Ethionir | oxaloaceta succinate |
| 3682 | FeCl3      | DL-Ethionir | NA       | DL-Ethionir | oxaloaceta succinate |
| 3683 | Fe(ClO4)2  | DL-Ethionir | NA       | DL-Ethionir | oxaloaceta succinate |
| 3684 | Fe(ClO4)3  | DL-Ethionir | NA       | DL-Ethionir | oxaloaceta succinate |
| 3685 | Fe Sulfide | DL-Ethionir | NA       | DL-Ethionir | oxaloaceta succinate |
| 3686 | Fe Acetate | DL-Ethionir | NA       | DL-Ethionir | oxaloaceta succinate |
| 3687 | Ferrocene  | DL-Ethionir | NA       | DL-Ethionir | oxaloaceta succinate |
| 3688 | control    | DL-Ethionir | NA       | DL-Ethionir | oxaloaceta succinate |
| 3689 | FeCl2      | 2-Mercapt   | NA       | 2-Mercapt   | oxaloaceta succinate |
| 3690 | FeCl3      | 2-Mercapt   | NA       | 2-Mercapt   | oxaloaceta succinate |
| 3691 | Fe(ClO4)2  | 2-Mercapt   | NA       | 2-Mercapt   | oxaloaceta succinate |
| 3692 | Fe(ClO4)3  | 2-Mercapt   | NA       | 2-Mercapt   | oxaloaceta succinate |
| 3693 | Fe Sulfide | 2-Mercapt   | NA       | 2-Mercapt   | oxaloaceta succinate |
| 3694 | Fe Acetate | 2-Mercapt   | NA       | 2-Mercapt   | oxaloaceta succinate |
| 3695 | Ferrocene  | 2-Mercapt   | NA       | 2-Mercapt   | oxaloaceta succinate |
| 3696 | control    | 2-Mercapt   | NA       | 2-Mercapt   | oxaloaceta succinate |
| 3697 | FeCl2      | S2O8        | 0.142168 | S2O8 + FeC  | pyruvate succinate   |
| 3698 | FeCl3      | S2O8        | 2.0131   | S2O8 + FeC  | pyruvate succinate   |
| 3699 | Fe(ClO4)2  | S2O8        | 2.223508 | S2O8 + Fe(  | pyruvate succinate   |
| 3700 | Fe(ClO4)3  | S2O8        | 1.160091 | S2O8 + Fe(  | pyruvate succinate   |
| 3701 | Fe Sulfide | S2O8        | 1.38756  | S2O8 + Fe   | pyruvate succinate   |
| 3702 | Fe Acetate | S2O8        | 0.705154 | S2O8 + Fe   | pyruvate succinate   |
| 3703 | Ferrocene  | S2O8        | -0.36964 | S2O8 + Fer  | pyruvate succinate   |
| 3704 | control    | S2O8        | 1.455801 | S2O8 + con  | pyruvate succinate   |
| 3705 | FeCl2      | control     | -0.15923 | control + F | pyruvate succinate   |
| 3706 | FeCl3      | control     | 0.557299 | control + F | pyruvate succinate   |
| 3707 | Fe(ClO4)2  | control     | 1.364813 | control + F | pyruvate succinate   |
| 3708 | Fe(ClO4)3  | control     | 1.148718 | control + F | pyruvate succinate   |
| 3709 | Fe Sulfide | control     | 0.039807 | control + F | pyruvate succinate   |
| 3710 | Fe Acetate | control     | 0.506118 | control + F | pyruvate succinate   |
| 3711 | Ferrocene  | control     | 0.250216 | control + F | pyruvate succinate   |
| 3712 | control    | control     | -0.5573  | control + c | pyruvate succinate   |

|      |            |           |          |                       |           |
|------|------------|-----------|----------|-----------------------|-----------|
| 3713 | FeCl2      | SO4       | 0.011373 | SO4 + FeCl: pyruvate  | succinate |
| 3714 | FeCl3      | SO4       | -1.01224 | SO4 + FeCl: pyruvate  | succinate |
| 3715 | Fe(ClO4)2  | SO4       | 0.420817 | SO4 + Fe(C pyruvate   | succinate |
| 3716 | Fe(ClO4)3  | SO4       | -0.472   | SO4 + Fe(C pyruvate   | succinate |
| 3717 | Fe Sulfide | SO4       | -0.65397 | SO4 + Fe S: pyruvate  | succinate |
| 3718 | Fe Acetate | SO4       | 0.193349 | SO4 + Fe A: pyruvate  | succinate |
| 3719 | Ferrocene  | SO4       | -1.0691  | SO4 + Ferr: pyruvate  | succinate |
| 3720 | control    | SO4       | -0.59142 | SO4 + cont pyruvate   | succinate |
| 3721 | FeCl2      | SO3       | -2.3145  | SO3 + FeCl: pyruvate  | succinate |
| 3722 | FeCl3      | SO3       | 0.392384 | SO3 + FeCl: pyruvate  | succinate |
| 3723 | Fe(ClO4)2  | SO3       | 0.03412  | SO3 + Fe(C pyruvate   | succinate |
| 3724 | Fe(ClO4)3  | SO3       | -0.29002 | SO3 + Fe(C pyruvate   | succinate |
| 3725 | Fe Sulfide | SO3       | -0.77908 | SO3 + Fe S: pyruvate  | succinate |
| 3726 | Fe Acetate | SO3       | 0.32983  | SO3 + Fe A: pyruvate  | succinate |
| 3727 | Ferrocene  | SO3       | -2.54765 | SO3 + Ferr: pyruvate  | succinate |
| 3728 | control    | SO3       | -0.01137 | SO3 + cont pyruvate   | succinate |
| 3729 | FeCl2      | HSO3      | -1.00655 | HSO3 + FeC pyruvate   | succinate |
| 3730 | FeCl3      | HSO3      | -0.19904 | HSO3 + FeC pyruvate   | succinate |
| 3731 | Fe(ClO4)2  | HSO3      | 0.045494 | HSO3 + Fe( pyruvate   | succinate |
| 3732 | Fe(ClO4)3  | HSO3      | -0.15923 | HSO3 + Fe( pyruvate   | succinate |
| 3733 | Fe Sulfide | HSO3      | 0.119421 | HSO3 + Fe : pyruvate  | succinate |
| 3734 | Fe Acetate | HSO3      | 0.164915 | HSO3 + Fe : pyruvate  | succinate |
| 3735 | Ferrocene  | HSO3      | -1.21127 | HSO3 + Fer pyruvate   | succinate |
| 3736 | control    | HSO3      | 0.284336 | HSO3 + cor pyruvate   | succinate |
| 3737 | FeCl2      | DMSO      | 0.341203 | DMSO + Fe pyruvate    | succinate |
| 3738 | FeCl3      | DMSO      | -0.04549 | DMSO + Fe pyruvate    | succinate |
| 3739 | Fe(ClO4)2  | DMSO      | -0.52887 | DMSO + Fe pyruvate    | succinate |
| 3740 | Fe(ClO4)3  | DMSO      | -0.33552 | DMSO + Fe pyruvate    | succinate |
| 3741 | Fe Sulfide | DMSO      | 4.572125 | DMSO + Fe pyruvate    | succinate |
| 3742 | Fe Acetate | DMSO      | 2.849048 | DMSO + Fe pyruvate    | succinate |
| 3743 | Ferrocene  | DMSO      | -1.18284 | DMSO + Fe pyruvate    | succinate |
| 3744 | control    | DMSO      | -0.75633 | DMSO + co pyruvate    | succinate |
| 3745 | FeCl2      | Cys       | 0.887129 | Cys + FeCl2 pyruvate  | succinate |
| 3746 | FeCl3      | Cys       | -0.03981 | Cys + FeCl3 pyruvate  | succinate |
| 3747 | Fe(ClO4)2  | Cys       | 1.188525 | Cys + Fe(Cl: pyruvate | succinate |
| 3748 | Fe(ClO4)3  | Cys       | 0        | Cys + Fe(Cl: pyruvate | succinate |
| 3749 | Fe Sulfide | Cys       | 2.985529 | Cys + Fe Su pyruvate  | succinate |
| 3750 | Fe Acetate | Cys       | 1.376187 | Cys + Fe Ac pyruvate  | succinate |
| 3751 | Ferrocene  | Cys       | 3.207311 | Cys + Ferro pyruvate  | succinate |
| 3752 | control    | Cys       | 0.233156 | Cys + contr pyruvate  | succinate |
| 3753 | FeCl2      | Methionin | -0.66535 | Methionin: pyruvate   | succinate |
| 3754 | FeCl3      | Methionin | -0.02843 | Methionin: pyruvate   | succinate |
| 3755 | Fe(ClO4)2  | Methionin | -0.06824 | Methionin: pyruvate   | succinate |
| 3756 | Fe(ClO4)3  | Methionin | -0.54024 | Methionin: pyruvate   | succinate |
| 3757 | Fe Sulfide | Methionin | -0.56299 | Methionin: pyruvate   | succinate |
| 3758 | Fe Acetate | Methionin | 0.773394 | Methionin: pyruvate   | succinate |
| 3759 | Ferrocene  | Methionin | -0.61985 | Methionin: pyruvate   | succinate |



|                                         |                               |          |                                      |           |
|-----------------------------------------|-------------------------------|----------|--------------------------------------|-----------|
| 3760 control                            | Methionine                    | 0        | Methionine pyruvate                  | succinate |
| 3761 FeCl <sub>2</sub>                  | Homocyste                     | -0.55161 | Homocyste pyruvate                   | succinate |
| 3762 FeCl <sub>3</sub>                  | Homocyste                     | -0.18198 | Homocyste pyruvate                   | succinate |
| 3763 Fe(ClO <sub>4</sub> ) <sub>2</sub> | Homocyste                     | 0.631226 | Homocyste pyruvate                   | succinate |
| 3764 Fe(ClO <sub>4</sub> ) <sub>3</sub> | Homocyste                     | -0.17629 | Homocyste pyruvate                   | succinate |
| 3765 Fe Sulfide                         | Homocyste                     | -1.32501 | Homocyste pyruvate                   | succinate |
| 3766 Fe Acetate                         | Homocyste                     | 0.164915 | Homocyste pyruvate                   | succinate |
| 3767 Ferrocene                          | Homocyste                     | 0.03412  | Homocyste pyruvate                   | succinate |
| 3768 control                            | Homocyste                     | -0.43219 | Homocyste pyruvate                   | succinate |
| 3769 FeCl <sub>2</sub>                  | DL-Ethionir                   | -0.20472 | DL-Ethionir pyruvate                 | succinate |
| 3770 FeCl <sub>3</sub>                  | DL-Ethionir                   | -0.65966 | DL-Ethionir pyruvate                 | succinate |
| 3771 Fe(ClO <sub>4</sub> ) <sub>2</sub> | DL-Ethionir                   | -1.84818 | DL-Ethionir pyruvate                 | succinate |
| 3772 Fe(ClO <sub>4</sub> ) <sub>3</sub> | DL-Ethionir                   | 0        | DL-Ethionir pyruvate                 | succinate |
| 3773 Fe Sulfide                         | DL-Ethionir                   | -0.32983 | DL-Ethionir pyruvate                 | succinate |
| 3774 Fe Acetate                         | DL-Ethionir                   | 0.773394 | DL-Ethionir pyruvate                 | succinate |
| 3775 Ferrocene                          | DL-Ethionir                   | 0.403757 | DL-Ethionir pyruvate                 | succinate |
| 3776 control                            | DL-Ethionir                   | -0.17629 | DL-Ethionir pyruvate                 | succinate |
| 3777 FeCl <sub>2</sub>                  | 2-Mercapt                     | 0.113734 | 2-Mercapt pyruvate                   | succinate |
| 3778 FeCl <sub>3</sub>                  | 2-Mercapt                     | 0.136481 | 2-Mercapt pyruvate                   | succinate |
| 3779 Fe(ClO <sub>4</sub> ) <sub>2</sub> | 2-Mercapt                     | 0.261589 | 2-Mercapt pyruvate                   | succinate |
| 3780 Fe(ClO <sub>4</sub> ) <sub>3</sub> | 2-Mercapt                     | 0.062554 | 2-Mercapt pyruvate                   | succinate |
| 3781 Fe Sulfide                         | 2-Mercapt                     | -0.43788 | 2-Mercapt pyruvate                   | succinate |
| 3782 Fe Acetate                         | 2-Mercapt                     | 1.478548 | 2-Mercapt pyruvate                   | succinate |
| 3783 Ferrocene                          | 2-Mercapt                     | 1.00655  | 2-Mercapt pyruvate                   | succinate |
| 3784 control                            | 2-Mercapt                     | -0.01706 | 2-Mercapt pyruvate                   | succinate |
| 3785 FeCl <sub>2</sub>                  | S <sub>2</sub> O <sub>8</sub> | -0.19393 | S <sub>2</sub> O <sub>8</sub> + FeC  | succinate |
| 3786 FeCl <sub>3</sub>                  | S <sub>2</sub> O <sub>8</sub> | -0.27016 | S <sub>2</sub> O <sub>8</sub> + FeC  | succinate |
| 3787 Fe(ClO <sub>4</sub> ) <sub>2</sub> | S <sub>2</sub> O <sub>8</sub> | -0.01264 | S <sub>2</sub> O <sub>8</sub> + Fe(C | succinate |
| 3788 Fe(ClO <sub>4</sub> ) <sub>3</sub> | S <sub>2</sub> O <sub>8</sub> | 0.020497 | S <sub>2</sub> O <sub>8</sub> + Fe(C | succinate |
| 3789 Fe Sulfide                         | S <sub>2</sub> O <sub>8</sub> | -0.46803 | S <sub>2</sub> O <sub>8</sub> + Fe S | succinate |
| 3790 Fe Acetate                         | S <sub>2</sub> O <sub>8</sub> | 0.723555 | S <sub>2</sub> O <sub>8</sub> + Fe S | succinate |
| 3791 Ferrocene                          | S <sub>2</sub> O <sub>8</sub> | -0.68321 | S <sub>2</sub> O <sub>8</sub> + Fer  | succinate |
| 3792 control                            | S <sub>2</sub> O <sub>8</sub> | -0.5561  | S <sub>2</sub> O <sub>8</sub> + con  | succinate |
| 3793 FeCl <sub>2</sub>                  | control                       | 2.01049  | control + F                          | succinate |
| 3794 FeCl <sub>3</sub>                  | control                       | 0.535206 | control + F                          | succinate |
| 3795 Fe(ClO <sub>4</sub> ) <sub>2</sub> | control                       | 0.637402 | control + F                          | succinate |
| 3796 Fe(ClO <sub>4</sub> ) <sub>3</sub> | control                       | -0.22225 | control + F                          | succinate |
| 3797 Fe Sulfide                         | control                       | -0.27812 | control + F                          | succinate |
| 3798 Fe Acetate                         | control                       | 2.388238 | control + F                          | succinate |
| 3799 Ferrocene                          | control                       | -0.30615 | control + F                          | succinate |
| 3800 control                            | control                       | -0.06428 | control + c                          | succinate |
| 3801 FeCl <sub>2</sub>                  | SO <sub>4</sub>               | 1.608008 | SO <sub>4</sub> + FeCl <sub>2</sub>  | succinate |
| 3802 FeCl <sub>3</sub>                  | SO <sub>4</sub>               | -0.16691 | SO <sub>4</sub> + FeCl <sub>3</sub>  | succinate |
| 3803 Fe(ClO <sub>4</sub> ) <sub>2</sub> | SO <sub>4</sub>               | 0.818182 | SO <sub>4</sub> + Fe(C               | succinate |
| 3804 Fe(ClO <sub>4</sub> ) <sub>3</sub> | SO <sub>4</sub>               | -0.38007 | SO <sub>4</sub> + Fe(C               | succinate |
| 3805 Fe Sulfide                         | SO <sub>4</sub>               | -0.59101 | SO <sub>4</sub> + Fe S               | succinate |
| 3806 Fe Acetate                         | SO <sub>4</sub>               | 0.050555 | SO <sub>4</sub> + Fe A               | succinate |

|      |            |           |          |             |           |           |
|------|------------|-----------|----------|-------------|-----------|-----------|
| 3807 | Ferrocene  | SO4       | -0.53944 | SO4 + Ferr  | succinate | succinate |
| 3808 | control    | SO4       | -0.48469 | SO4 + cont  | succinate | succinate |
| 3809 | FeCl2      | SO3       | 2.339892 | SO3 + FeCl  | succinate | succinate |
| 3810 | FeCl3      | SO3       | 0.122403 | SO3 + FeCl  | succinate | succinate |
| 3811 | Fe(ClO4)2  | SO3       | 1.044157 | SO3 + Fe(C  | succinate | succinate |
| 3812 | Fe(ClO4)3  | SO3       | 0.127473 | SO3 + Fe(C  | succinate | succinate |
| 3813 | Fe Sulfide | SO3       | -0.05878 | SO3 + Fe S  | succinate | succinate |
| 3814 | Fe Acetate | SO3       | 1.86147  | SO3 + Fe A  | succinate | succinate |
| 3815 | Ferrocene  | SO3       | -0.06823 | SO3 + Ferr  | succinate | succinate |
| 3816 | control    | SO3       | -0.08087 | SO3 + cont  | succinate | succinate |
| 3817 | FeCl2      | HSO3      | 0.012639 | HSO3 + Fe(C | succinate | succinate |
| 3818 | FeCl3      | HSO3      | -0.19961 | HSO3 + Fe(C | succinate | succinate |
| 3819 | Fe(ClO4)2  | HSO3      | 0.070545 | HSO3 + Fe(  | succinate | succinate |
| 3820 | Fe(ClO4)3  | HSO3      | -0.73634 | HSO3 + Fe(  | succinate | succinate |
| 3821 | Fe Sulfide | HSO3      | -0.20443 | HSO3 + Fe   | succinate | succinate |
| 3822 | Fe Acetate | HSO3      | 2.020232 | HSO3 + Fe   | succinate | succinate |
| 3823 | Ferrocene  | HSO3      | -0.08141 | HSO3 + Fer  | succinate | succinate |
| 3824 | control    | HSO3      | -0.28743 | HSO3 + cor  | succinate | succinate |
| 3825 | FeCl2      | DMSO      | 2.684251 | DMSO + Fe   | succinate | succinate |
| 3826 | FeCl3      | DMSO      | 0.144494 | DMSO + Fe   | succinate | succinate |
| 3827 | Fe(ClO4)2  | DMSO      | 2.053947 | DMSO + Fe   | succinate | succinate |
| 3828 | Fe(ClO4)3  | DMSO      | 0.236658 | DMSO + Fe   | succinate | succinate |
| 3829 | Fe Sulfide | DMSO      | -0.57555 | DMSO + Fe   | succinate | succinate |
| 3830 | Fe Acetate | DMSO      | 2.42112  | DMSO + Fe   | succinate | succinate |
| 3831 | Ferrocene  | DMSO      | -0.24991 | DMSO + Fe   | succinate | succinate |
| 3832 | control    | DMSO      | -0.52919 | DMSO + co   | succinate | succinate |
| 3833 | FeCl2      | Cys       | 1.984126 | Cys + FeCl2 | succinate | succinate |
| 3834 | FeCl3      | Cys       | -0.49794 | Cys + FeCl3 | succinate | succinate |
| 3835 | Fe(ClO4)2  | Cys       | 1.182965 | Cys + Fe(Cl | succinate | succinate |
| 3836 | Fe(ClO4)3  | Cys       | 0.204355 | Cys + Fe(Cl | succinate | succinate |
| 3837 | Fe Sulfide | Cys       | 0.383144 | Cys + Fe Su | succinate | succinate |
| 3838 | Fe Acetate | Cys       | 2.091066 | Cys + Fe Ac | succinate | succinate |
| 3839 | Ferrocene  | Cys       | -0.28663 | Cys + Ferro | succinate | succinate |
| 3840 | control    | Cys       | -0.54998 | Cys + contr | succinate | succinate |
| 3841 | FeCl2      | Methionin | 2.27257  | Methionin   | succinate | succinate |
| 3842 | FeCl3      | Methionin | -0.08293 | Methionin   | succinate | succinate |
| 3843 | Fe(ClO4)2  | Methionin | 1.236344 | Methionin   | succinate | succinate |
| 3844 | Fe(ClO4)3  | Methionin | -0.31915 | Methionin   | succinate | succinate |
| 3845 | Fe Sulfide | Methionin | -0.50591 | Methionin   | succinate | succinate |
| 3846 | Fe Acetate | Methionin | 1.880554 | Methionin   | succinate | succinate |
| 3847 | Ferrocene  | Methionin | -0.25346 | Methionin   | succinate | succinate |
| 3848 | control    | Methionin | -0.72142 | Methionin   | succinate | succinate |
| 3849 | FeCl2      | Homocyste | 0.197294 | Homocyste   | succinate | succinate |
| 3850 | FeCl3      | Homocyste | 0.188095 | Homocyste   | succinate | succinate |
| 3851 | Fe(ClO4)2  | Homocyste | 0.142574 | Homocyste   | succinate | succinate |
| 3852 | Fe(ClO4)3  | Homocyste | -0.15702 | Homocyste   | succinate | succinate |
| 3853 | Fe Sulfide | Homocyste | -0.32469 | Homocyste   | succinate | succinate |

|      |                                    |                               |          |                                                 |           |
|------|------------------------------------|-------------------------------|----------|-------------------------------------------------|-----------|
| 3854 | Fe Acetate                         | Homocyste                     | 1.147693 | Homocyste succinate                             | succinate |
| 3855 | Ferrocene                          | Homocyste                     | -0.89727 | Homocyste succinate                             | succinate |
| 3856 | control                            | Homocyste                     | -0.40462 | Homocyste succinate                             | succinate |
| 3857 | FeCl <sub>2</sub>                  | DL-Ethionir                   | 2.186381 | DL-Ethionir succinate                           | succinate |
| 3858 | FeCl <sub>3</sub>                  | DL-Ethionir                   | 0.176507 | DL-Ethionir succinate                           | succinate |
| 3859 | Fe(ClO <sub>4</sub> ) <sub>2</sub> | DL-Ethionir                   | 0.576454 | DL-Ethionir succinate                           | succinate |
| 3860 | Fe(ClO <sub>4</sub> ) <sub>3</sub> | DL-Ethionir                   | 0.07576  | DL-Ethionir succinate                           | succinate |
| 3861 | Fe Sulfide                         | DL-Ethionir                   | -0.16836 | DL-Ethionir succinate                           | succinate |
| 3862 | Fe Acetate                         | DL-Ethionir                   | 1.373342 | DL-Ethionir succinate                           | succinate |
| 3863 | Ferrocene                          | DL-Ethionir                   | -0.35236 | DL-Ethionir succinate                           | succinate |
| 3864 | control                            | DL-Ethionir                   | 0.030891 | DL-Ethionir succinate                           | succinate |
| 3865 | FeCl <sub>2</sub>                  | 2-Mercapt                     | 2.231142 | 2-Mercapt succinate                             | succinate |
| 3866 | FeCl <sub>3</sub>                  | 2-Mercapt                     | -0.05457 | 2-Mercapt succinate                             | succinate |
| 3867 | Fe(ClO <sub>4</sub> ) <sub>2</sub> | 2-Mercapt                     | 0.730942 | 2-Mercapt succinate                             | succinate |
| 3868 | Fe(ClO <sub>4</sub> ) <sub>3</sub> | 2-Mercapt                     | -0.04686 | 2-Mercapt succinate                             | succinate |
| 3869 | Fe Sulfide                         | 2-Mercapt                     | -0.52181 | 2-Mercapt succinate                             | succinate |
| 3870 | Fe Acetate                         | 2-Mercapt                     | 2.205249 | 2-Mercapt succinate                             | succinate |
| 3871 | Ferrocene                          | 2-Mercapt                     | -0.44163 | 2-Mercapt succinate                             | succinate |
| 3872 | control                            | 2-Mercapt                     | -0.54683 | 2-Mercapt succinate                             | succinate |
| 3873 | FeCl <sub>2</sub>                  | S <sub>2</sub> O <sub>8</sub> | NA       | S <sub>2</sub> O <sub>8</sub> + FeC Succsemial  | succinate |
| 3874 | FeCl <sub>3</sub>                  | S <sub>2</sub> O <sub>8</sub> | NA       | S <sub>2</sub> O <sub>8</sub> + FeC Succsemial  | succinate |
| 3875 | Fe(ClO <sub>4</sub> ) <sub>2</sub> | S <sub>2</sub> O <sub>8</sub> | NA       | S <sub>2</sub> O <sub>8</sub> + Fe( Succsemial  | succinate |
| 3876 | Fe(ClO <sub>4</sub> ) <sub>3</sub> | S <sub>2</sub> O <sub>8</sub> | NA       | S <sub>2</sub> O <sub>8</sub> + Fe( Succsemial  | succinate |
| 3877 | Fe Sulfide                         | S <sub>2</sub> O <sub>8</sub> | NA       | S <sub>2</sub> O <sub>8</sub> + Fe ! Succsemial | succinate |
| 3878 | Fe Acetate                         | S <sub>2</sub> O <sub>8</sub> | NA       | S <sub>2</sub> O <sub>8</sub> + Fe / Succsemial | succinate |
| 3879 | Ferrocene                          | S <sub>2</sub> O <sub>8</sub> | NA       | S <sub>2</sub> O <sub>8</sub> + Fer Succsemial  | succinate |
| 3880 | control                            | S <sub>2</sub> O <sub>8</sub> | NA       | S <sub>2</sub> O <sub>8</sub> + con Succsemial  | succinate |
| 3881 | FeCl <sub>2</sub>                  | control                       | NA       | control + Fi Succsemial                         | succinate |
| 3882 | FeCl <sub>3</sub>                  | control                       | NA       | control + Fi Succsemial                         | succinate |
| 3883 | Fe(ClO <sub>4</sub> ) <sub>2</sub> | control                       | NA       | control + Fi Succsemial                         | succinate |
| 3884 | Fe(ClO <sub>4</sub> ) <sub>3</sub> | control                       | NA       | control + Fi Succsemial                         | succinate |
| 3885 | Fe Sulfide                         | control                       | NA       | control + Fi Succsemial                         | succinate |
| 3886 | Fe Acetate                         | control                       | NA       | control + Fi Succsemial                         | succinate |
| 3887 | Ferrocene                          | control                       | NA       | control + Fi Succsemial                         | succinate |
| 3888 | control                            | control                       | NA       | control + c Succsemial                          | succinate |
| 3889 | FeCl <sub>2</sub>                  | SO <sub>4</sub>               | NA       | SO <sub>4</sub> + FeCl: Succsemial              | succinate |
| 3890 | FeCl <sub>3</sub>                  | SO <sub>4</sub>               | NA       | SO <sub>4</sub> + FeCl: Succsemial              | succinate |
| 3891 | Fe(ClO <sub>4</sub> ) <sub>2</sub> | SO <sub>4</sub>               | NA       | SO <sub>4</sub> + Fe(C Succsemial               | succinate |
| 3892 | Fe(ClO <sub>4</sub> ) <sub>3</sub> | SO <sub>4</sub>               | NA       | SO <sub>4</sub> + Fe(C Succsemial               | succinate |
| 3893 | Fe Sulfide                         | SO <sub>4</sub>               | NA       | SO <sub>4</sub> + Fe S: Succsemial              | succinate |
| 3894 | Fe Acetate                         | SO <sub>4</sub>               | NA       | SO <sub>4</sub> + Fe A: Succsemial              | succinate |
| 3895 | Ferrocene                          | SO <sub>4</sub>               | NA       | SO <sub>4</sub> + Ferr: Succsemial              | succinate |
| 3896 | control                            | SO <sub>4</sub>               | NA       | SO <sub>4</sub> + cont Succsemial               | succinate |
| 3897 | FeCl <sub>2</sub>                  | SO <sub>3</sub>               | NA       | SO <sub>3</sub> + FeCl: Succsemial              | succinate |
| 3898 | FeCl <sub>3</sub>                  | SO <sub>3</sub>               | NA       | SO <sub>3</sub> + FeCl: Succsemial              | succinate |
| 3899 | Fe(ClO <sub>4</sub> ) <sub>2</sub> | SO <sub>3</sub>               | NA       | SO <sub>3</sub> + Fe(C Succsemial               | succinate |
| 3900 | Fe(ClO <sub>4</sub> ) <sub>3</sub> | SO <sub>3</sub>               | NA       | SO <sub>3</sub> + Fe(C Succsemial               | succinate |

|      |            |             |    |             |                      |
|------|------------|-------------|----|-------------|----------------------|
| 3901 | Fe Sulfide | SO3         | NA | SO3 + Fe S  | Succsemial succinate |
| 3902 | Fe Acetate | SO3         | NA | SO3 + Fe A  | Succsemial succinate |
| 3903 | Ferrocene  | SO3         | NA | SO3 + Ferr  | Succsemial succinate |
| 3904 | control    | SO3         | NA | SO3 + cont  | Succsemial succinate |
| 3905 | FeCl2      | HSO3        | NA | HSO3 + FeC  | Succsemial succinate |
| 3906 | FeCl3      | HSO3        | NA | HSO3 + FeC  | Succsemial succinate |
| 3907 | Fe(ClO4)2  | HSO3        | NA | HSO3 + Fe(  | Succsemial succinate |
| 3908 | Fe(ClO4)3  | HSO3        | NA | HSO3 + Fe(  | Succsemial succinate |
| 3909 | Fe Sulfide | HSO3        | NA | HSO3 + Fe . | Succsemial succinate |
| 3910 | Fe Acetate | HSO3        | NA | HSO3 + Fe . | Succsemial succinate |
| 3911 | Ferrocene  | HSO3        | NA | HSO3 + Fer  | Succsemial succinate |
| 3912 | control    | HSO3        | NA | HSO3 + cor  | Succsemial succinate |
| 3913 | FeCl2      | DMSO        | NA | DMSO + Fe   | Succsemial succinate |
| 3914 | FeCl3      | DMSO        | NA | DMSO + Fe   | Succsemial succinate |
| 3915 | Fe(ClO4)2  | DMSO        | NA | DMSO + Fe   | Succsemial succinate |
| 3916 | Fe(ClO4)3  | DMSO        | NA | DMSO + Fe   | Succsemial succinate |
| 3917 | Fe Sulfide | DMSO        | NA | DMSO + Fe   | Succsemial succinate |
| 3918 | Fe Acetate | DMSO        | NA | DMSO + Fe   | Succsemial succinate |
| 3919 | Ferrocene  | DMSO        | NA | DMSO + Fe   | Succsemial succinate |
| 3920 | control    | DMSO        | NA | DMSO + co   | Succsemial succinate |
| 3921 | FeCl2      | Cys         | NA | Cys + FeCl2 | Succsemial succinate |
| 3922 | FeCl3      | Cys         | NA | Cys + FeCl3 | Succsemial succinate |
| 3923 | Fe(ClO4)2  | Cys         | NA | Cys + Fe(Cl | Succsemial succinate |
| 3924 | Fe(ClO4)3  | Cys         | NA | Cys + Fe(Cl | Succsemial succinate |
| 3925 | Fe Sulfide | Cys         | NA | Cys + Fe Su | Succsemial succinate |
| 3926 | Fe Acetate | Cys         | NA | Cys + Fe Ac | Succsemial succinate |
| 3927 | Ferrocene  | Cys         | NA | Cys + Ferro | Succsemial succinate |
| 3928 | control    | Cys         | NA | Cys + contr | Succsemial succinate |
| 3929 | FeCl2      | Methionin   | NA | Methionin   | Succsemial succinate |
| 3930 | FeCl3      | Methionin   | NA | Methionin   | Succsemial succinate |
| 3931 | Fe(ClO4)2  | Methionin   | NA | Methionin   | Succsemial succinate |
| 3932 | Fe(ClO4)3  | Methionin   | NA | Methionin   | Succsemial succinate |
| 3933 | Fe Sulfide | Methionin   | NA | Methionin   | Succsemial succinate |
| 3934 | Fe Acetate | Methionin   | NA | Methionin   | Succsemial succinate |
| 3935 | Ferrocene  | Methionin   | NA | Methionin   | Succsemial succinate |
| 3936 | control    | Methionin   | NA | Methionin   | Succsemial succinate |
| 3937 | FeCl2      | Homocyste   | NA | Homocyste   | Succsemial succinate |
| 3938 | FeCl3      | Homocyste   | NA | Homocyste   | Succsemial succinate |
| 3939 | Fe(ClO4)2  | Homocyste   | NA | Homocyste   | Succsemial succinate |
| 3940 | Fe(ClO4)3  | Homocyste   | NA | Homocyste   | Succsemial succinate |
| 3941 | Fe Sulfide | Homocyste   | NA | Homocyste   | Succsemial succinate |
| 3942 | Fe Acetate | Homocyste   | NA | Homocyste   | Succsemial succinate |
| 3943 | Ferrocene  | Homocyste   | NA | Homocyste   | Succsemial succinate |
| 3944 | control    | Homocyste   | NA | Homocyste   | Succsemial succinate |
| 3945 | FeCl2      | DL-Ethionir | NA | DL-Ethionir | Succsemial succinate |
| 3946 | FeCl3      | DL-Ethionir | NA | DL-Ethionir | Succsemial succinate |
| 3947 | Fe(ClO4)2  | DL-Ethionir | NA | DL-Ethionir | Succsemial succinate |

|      |                                    |             |    |                                  |
|------|------------------------------------|-------------|----|----------------------------------|
| 3948 | Fe(ClO <sub>4</sub> ) <sub>3</sub> | DL-Ethionir | NA | DL-Ethionir Succsemial succinate |
| 3949 | Fe Sulfide                         | DL-Ethionir | NA | DL-Ethionir Succsemial succinate |
| 3950 | Fe Acetate                         | DL-Ethionir | NA | DL-Ethionir Succsemial succinate |
| 3951 | Ferrocene                          | DL-Ethionir | NA | DL-Ethionir Succsemial succinate |
| 3952 | control                            | DL-Ethionir | NA | DL-Ethionir Succsemial succinate |
| 3953 | FeCl <sub>2</sub>                  | 2-Mercapt   | NA | 2-Mercapt Succsemial succinate   |
| 3954 | FeCl <sub>3</sub>                  | 2-Mercapt   | NA | 2-Mercapt Succsemial succinate   |
| 3955 | Fe(ClO <sub>4</sub> ) <sub>2</sub> | 2-Mercapt   | NA | 2-Mercapt Succsemial succinate   |
| 3956 | Fe(ClO <sub>4</sub> ) <sub>3</sub> | 2-Mercapt   | NA | 2-Mercapt Succsemial succinate   |
| 3957 | Fe Sulfide                         | 2-Mercapt   | NA | 2-Mercapt Succsemial succinate   |
| 3958 | Fe Acetate                         | 2-Mercapt   | NA | 2-Mercapt Succsemial succinate   |
| 3959 | Ferrocene                          | 2-Mercapt   | NA | 2-Mercapt Succsemial succinate   |
| 3960 | control                            | 2-Mercapt   | NA | 2-Mercapt Succsemial succinate   |
