# Supplementary material
Source: PubMed Central journal article supplement (PMC5455955)
Supplement: NIHMS73005-supplement-Supplementary_Table_4.pdf [file NIHMS73005-supplement-Supplementary_Table_4.pdf]

| substrate   | product    | z-score  | iron source | sulfur source     |
|-------------|------------|----------|-------------|-------------------|
| citrate     | malate     | 2.083136 | water       | water             |
| cis-aconita | oxaloaceta | 2.299597 | water       | cystein           |
| cis-aconita | malate     | 2.945607 | water       | DL-ethionine      |
| cis-aconita | succinate  | 2.574464 | water       | NaHSO3            |
| citrate     | succinate  | 3.231133 | water       | NaHSO3            |
| fumarate    | fumarate   | 1.733918 | water       | NaHSO3            |
| cis-aconita | alpha-keto | 8.369609 | water       | (NH4)S2O8         |
| cis-aconita | pyruvate   | 16.01778 | water       | (NH4)S2O8         |
| cis-aconita | succinate  | 31.56759 | water       | (NH4)S2O8         |
| citrate     | alpha-keto | 5.667225 | water       | (NH4)S2O8         |
| citrate     | oxaloaceta | Inf      | water       | (NH4)S2O8         |
| citrate     | succinate  | 10.27371 | water       | (NH4)S2O8         |
| fumarate    | pyruvate   | 4.09444  | water       | (NH4)S2O8         |
| fumarate    | succinate  | 6.91919  | water       | (NH4)S2O8         |
| malate      | oxaloaceta | 2.84921  | water       | (NH4)S2O8         |
| malate      | pyruvate   | 29.30294 | water       | (NH4)S2O8         |
| succinate   | fumarate   | Inf      | water       | (NH4)S2O8         |
| succinate   | oxaloaceta | Inf      | water       | (NH4)S2O8         |
| citrate     | pyruvate   | 1.970257 | water       | Na2SO3            |
| succinate   | succinate  | 2.205249 | Fe Acetate  | 2-mercaptoethanol |
| succinate   | succinate  | 2.388238 | Fe Acetate  | water             |
| citrate     | pyruvate   | 3.09905  | Fe Acetate  | cystein           |
| fumarate    | pyruvate   | 3.464526 | Fe Acetate  | cystein           |
| succinate   | succinate  | 2.091066 | Fe Acetate  | cystein           |
| cis-aconita | oxaloaceta | 2.058767 | Fe Acetate  | DMSO              |
| succinate   | pyruvate   | 2.849048 | Fe Acetate  | DMSO              |
| succinate   | succinate  | 2.42112  | Fe Acetate  | DMSO              |
| cis-aconita | pyruvate   | 5.130571 | Fe Acetate  | NaHSO3            |
| malate      | malate     | 1.758471 | Fe Acetate  | NaHSO3            |
| succinate   | succinate  | 2.020232 | Fe Acetate  | NaHSO3            |
| succinate   | succinate  | 1.880554 | Fe Acetate  | methionine        |
| cis-aconita | alpha-keto | 2.050336 | Fe Acetate  | (NH4)S2O8         |
| cis-aconita | pyruvate   | 4.554595 | Fe Acetate  | (NH4)S2O8         |
| cis-aconita | succinate  | 21.23746 | Fe Acetate  | (NH4)S2O8         |
| fumarate    | pyruvate   | 3.482024 | Fe Acetate  | (NH4)S2O8         |
| fumarate    | succinate  | 2.692405 | Fe Acetate  | (NH4)S2O8         |
| malate      | pyruvate   | 13.81132 | Fe Acetate  | (NH4)S2O8         |
| succinate   | succinate  | 1.86147  | Fe Acetate  | Na2SO3            |
| cis-aconita | oxaloaceta | 2.275514 | Fe Sulfide  | 2-mercaptoethanol |
| fumarate    | malate     | 1.980317 | Fe Sulfide  | 2-mercaptoethanol |
| citrate     | pyruvate   | 3.988402 | Fe Sulfide  | cystein           |
| succinate   | pyruvate   | 2.985529 | Fe Sulfide  | cystein           |
| cis-aconita | oxaloaceta | 2.039302 | Fe Sulfide  | DL-ethionine      |
| succinate   | pyruvate   | 4.572125 | Fe Sulfide  | DMSO              |
| cis-aconita | pyruvate   | 1.632976 | Fe Sulfide  | Homocysteic acid  |
| citrate     | succinate  | 2.185134 | Fe Sulfide  | NaHSO3            |

|             |             |          |            |                   |
|-------------|-------------|----------|------------|-------------------|
| malate      | oxaloaceta  | 1.927203 | Fe Sulfide | NaHSO3            |
| cis-aconita | alpha-keto  | 7.596838 | Fe Sulfide | (NH4)S2O8         |
| cis-aconita | pyruvate    | 17.81874 | Fe Sulfide | (NH4)S2O8         |
| cis-aconita | succinate   | 37.99382 | Fe Sulfide | (NH4)S2O8         |
| citrate     | alpha-keto  | 9.410713 | Fe Sulfide | (NH4)S2O8         |
| citrate     | oxaloaceta  | Inf      | Fe Sulfide | (NH4)S2O8         |
| citrate     | pyruvate    | 3.27692  | Fe Sulfide | (NH4)S2O8         |
| citrate     | succinate   | 18.57722 | Fe Sulfide | (NH4)S2O8         |
| fumarate    | oxaloaceta  | 1.774947 | Fe Sulfide | (NH4)S2O8         |
| fumarate    | pyruvate    | 4.549378 | Fe Sulfide | (NH4)S2O8         |
| fumarate    | succinate   | 4.958822 | Fe Sulfide | (NH4)S2O8         |
| malate      | oxaloaceta  | 2.228762 | Fe Sulfide | (NH4)S2O8         |
| malate      | pyruvate    | 26.34782 | Fe Sulfide | (NH4)S2O8         |
| succinate   | oxaloaceta  | Inf      | Fe Sulfide | (NH4)S2O8         |
| fumarate    | oxaloaceta  | 1.609515 | Fe Sulfide | Na2SO3            |
| malate      | oxaloaceta  | 1.65684  | Fe Sulfide | Na2SO4            |
| citrate     | cis-aconita | 2.581507 | Fe(ClO4)2  | water             |
| cis-aconita | oxaloaceta  | 2.591562 | Fe(ClO4)2  | cystein           |
| fumarate    | pyruvate    | 2.729627 | Fe(ClO4)2  | cystein           |
| cis-aconita | oxaloaceta  | 2.168955 | Fe(ClO4)2  | DL-ethionine      |
| fumarate    | malate      | 1.605663 | Fe(ClO4)2  | DL-ethionine      |
| succinate   | succinate   | 2.053947 | Fe(ClO4)2  | DMSO              |
| cis-aconita | oxaloaceta  | 2.299597 | Fe(ClO4)2  | methionine        |
| cis-aconita | oxaloaceta  | 2.448054 | Fe(ClO4)2  | (NH4)S2O8         |
| cis-aconita | pyruvate    | 4.43773  | Fe(ClO4)2  | (NH4)S2O8         |
| cis-aconita | succinate   | 11.38896 | Fe(ClO4)2  | (NH4)S2O8         |
| fumarate    | pyruvate    | 3.044584 | Fe(ClO4)2  | (NH4)S2O8         |
| fumarate    | succinate   | 2.543516 | Fe(ClO4)2  | (NH4)S2O8         |
| malate      | pyruvate    | 8.130529 | Fe(ClO4)2  | (NH4)S2O8         |
| succinate   | oxaloaceta  | Inf      | Fe(ClO4)2  | (NH4)S2O8         |
| succinate   | pyruvate    | 2.223508 | Fe(ClO4)2  | (NH4)S2O8         |
| cis-aconita | oxaloaceta  | 2.477085 | Fe(ClO4)2  | Na2SO4            |
| cis-aconita | citrate     | 1.756857 | Fe(ClO4)3  | 2-mercaptoethanol |
| cis-aconita | oxaloaceta  | 2.275514 | Fe(ClO4)3  | 2-mercaptoethanol |
| cis-aconita | succinate   | 1.762651 | Fe(ClO4)3  | water             |
| citrate     | pyruvate    | 2.934862 | Fe(ClO4)3  | cystein           |
| fumarate    | malate      | 1.766229 | Fe(ClO4)3  | cystein           |
| fumarate    | pyruvate    | 3.324545 | Fe(ClO4)3  | cystein           |
| cis-aconita | oxaloaceta  | 2.517004 | Fe(ClO4)3  | NaHSO3            |
| cis-aconita | alpha-keto  | 3.861778 | Fe(ClO4)3  | (NH4)S2O8         |
| cis-aconita | pyruvate    | 2.530331 | Fe(ClO4)3  | (NH4)S2O8         |
| cis-aconita | succinate   | 27.90202 | Fe(ClO4)3  | (NH4)S2O8         |
| citrate     | succinate   | 3.811447 | Fe(ClO4)3  | (NH4)S2O8         |
| fumarate    | pyruvate    | 4.181928 | Fe(ClO4)3  | (NH4)S2O8         |
| fumarate    | succinate   | 4.404625 | Fe(ClO4)3  | (NH4)S2O8         |
| malate      | oxaloaceta  | 1.632577 | Fe(ClO4)3  | (NH4)S2O8         |
| succinate   | oxaloaceta  | Inf      | Fe(ClO4)3  | (NH4)S2O8         |

|             |              |          |                                    |                                                               |
|-------------|--------------|----------|------------------------------------|---------------------------------------------------------------|
| cis-aconita | oxaloaceta   | 2.156418 | Fe(ClO <sub>4</sub> ) <sub>3</sub> | Na <sub>2</sub> SO <sub>4</sub>                               |
| succinate   | succinate    | 2.231142 | FeCl <sub>2</sub>                  | 2-mercaptoethanol                                             |
| cis-aconita | alpha-keto   | 1.747044 | FeCl <sub>2</sub>                  | water                                                         |
| cis-aconita | oxaloaceta   | 2.001693 | FeCl <sub>2</sub>                  | water                                                         |
| succinate   | succinate    | 2.01049  | FeCl <sub>2</sub>                  | water                                                         |
| fumarate    | pyruvate     | 2.41467  | FeCl <sub>2</sub>                  | cystein                                                       |
| succinate   | succinate    | 1.984126 | FeCl <sub>2</sub>                  | cystein                                                       |
| succinate   | succinate    | 2.186381 | FeCl <sub>2</sub>                  | DL-ethionine                                                  |
| succinate   | succinate    | 2.684251 | FeCl <sub>2</sub>                  | DMSO                                                          |
| cis-aconita | oxaloaceta   | 1.991466 | FeCl <sub>2</sub>                  | NaHSO <sub>3</sub>                                            |
| cis-aconita | oxaloaceta   | 2.429249 | FeCl <sub>2</sub>                  | methionine                                                    |
| succinate   | succinate    | 2.27257  | FeCl <sub>2</sub>                  | methionine                                                    |
| cis-aconita | pyruvate     | 2.405118 | FeCl <sub>2</sub>                  | (NH <sub>4</sub> ) <sub>2</sub> S <sub>2</sub> O <sub>8</sub> |
| cis-aconita | succinate    | 10.00242 | FeCl <sub>2</sub>                  | (NH <sub>4</sub> ) <sub>2</sub> S <sub>2</sub> O <sub>8</sub> |
| fumarate    | pyruvate     | 3.587009 | FeCl <sub>2</sub>                  | (NH <sub>4</sub> ) <sub>2</sub> S <sub>2</sub> O <sub>8</sub> |
| fumarate    | succinate    | 2.808207 | FeCl <sub>2</sub>                  | (NH <sub>4</sub> ) <sub>2</sub> S <sub>2</sub> O <sub>8</sub> |
| fumarate    | succinic sei | 2.010532 | FeCl <sub>2</sub>                  | (NH <sub>4</sub> ) <sub>2</sub> S <sub>2</sub> O <sub>8</sub> |
| malate      | pyruvate     | 8.795134 | FeCl <sub>2</sub>                  | (NH <sub>4</sub> ) <sub>2</sub> S <sub>2</sub> O <sub>8</sub> |
| cis-aconita | oxaloaceta   | 1.936372 | FeCl <sub>2</sub>                  | Na <sub>2</sub> SO <sub>3</sub>                               |
| malate      | pyruvate     | 1.785136 | FeCl <sub>2</sub>                  | Na <sub>2</sub> SO <sub>3</sub>                               |
| succinate   | succinate    | 2.339892 | FeCl <sub>2</sub>                  | Na <sub>2</sub> SO <sub>3</sub>                               |
| cis-aconita | oxaloaceta   | 2.132665 | FeCl <sub>2</sub>                  | Na <sub>2</sub> SO <sub>4</sub>                               |
| succinate   | succinate    | 1.608008 | FeCl <sub>2</sub>                  | Na <sub>2</sub> SO <sub>4</sub>                               |
| cis-aconita | oxaloaceta   | 2.186769 | FeCl <sub>3</sub>                  | 2-mercaptoethanol                                             |
| cis-aconita | fumarate     | 2.086236 | FeCl <sub>3</sub>                  | cystein                                                       |
| fumarate    | pyruvate     | 3.167067 | FeCl <sub>3</sub>                  | cystein                                                       |
| cis-aconita | oxaloaceta   | 2.087468 | FeCl <sub>3</sub>                  | Homocysteic acid                                              |
| cis-aconita | alpha-keto   | 1.971397 | FeCl <sub>3</sub>                  | (NH <sub>4</sub> ) <sub>2</sub> S <sub>2</sub> O <sub>8</sub> |
| cis-aconita | pyruvate     | 5.270392 | FeCl <sub>3</sub>                  | (NH <sub>4</sub> ) <sub>2</sub> S <sub>2</sub> O <sub>8</sub> |
| cis-aconita | succinate    | 18.76479 | FeCl <sub>3</sub>                  | (NH <sub>4</sub> ) <sub>2</sub> S <sub>2</sub> O <sub>8</sub> |
| fumarate    | oxaloaceta   | 1.616408 | FeCl <sub>3</sub>                  | (NH <sub>4</sub> ) <sub>2</sub> S <sub>2</sub> O <sub>8</sub> |
| fumarate    | pyruvate     | 6.754076 | FeCl <sub>3</sub>                  | (NH <sub>4</sub> ) <sub>2</sub> S <sub>2</sub> O <sub>8</sub> |
| fumarate    | succinate    | 5.016723 | FeCl <sub>3</sub>                  | (NH <sub>4</sub> ) <sub>2</sub> S <sub>2</sub> O <sub>8</sub> |
| malate      | pyruvate     | 5.733205 | FeCl <sub>3</sub>                  | (NH <sub>4</sub> ) <sub>2</sub> S <sub>2</sub> O <sub>8</sub> |
| succinate   | oxaloaceta   | Inf      | FeCl <sub>3</sub>                  | (NH <sub>4</sub> ) <sub>2</sub> S <sub>2</sub> O <sub>8</sub> |
| succinate   | pyruvate     | 2.0131   | FeCl <sub>3</sub>                  | (NH <sub>4</sub> ) <sub>2</sub> S <sub>2</sub> O <sub>8</sub> |
| cis-aconita | oxaloaceta   | 2.076252 | Ferrocene                          | 2-mercaptoethanol                                             |
| cis-aconita | oxaloaceta   | 1.819256 | Ferrocene                          | water                                                         |
| malate      | oxaloaceta   | 2.256491 | Ferrocene                          | water                                                         |
| cis-aconita | oxaloaceta   | 2.028745 | Ferrocene                          | cystein                                                       |
| succinate   | pyruvate     | 3.207311 | Ferrocene                          | cystein                                                       |
| cis-aconita | pyruvate     | 2.336252 | Ferrocene                          | NaHSO <sub>3</sub>                                            |
| cis-aconita | succinate    | 1.613695 | Ferrocene                          | NaHSO <sub>3</sub>                                            |
| fumarate    | fumarate     | 3.131835 | Ferrocene                          | NaHSO <sub>3</sub>                                            |
| cis-aconita | alpha-keto   | 4.206617 | Ferrocene                          | (NH <sub>4</sub> ) <sub>2</sub> S <sub>2</sub> O <sub>8</sub> |
| cis-aconita | pyruvate     | 19.32129 | Ferrocene                          | (NH <sub>4</sub> ) <sub>2</sub> S <sub>2</sub> O <sub>8</sub> |
| cis-aconita | succinate    | 35.51742 | Ferrocene                          | (NH <sub>4</sub> ) <sub>2</sub> S <sub>2</sub> O <sub>8</sub> |

|             |             |          |           |           |
|-------------|-------------|----------|-----------|-----------|
| citrate     | alpha-keto  | 5.26428  | Ferrocene | (NH4)S2O8 |
| citrate     | oxaloaceta  | Inf      | Ferrocene | (NH4)S2O8 |
| citrate     | succinate   | 16.43508 | Ferrocene | (NH4)S2O8 |
| fumarate    | pyruvate    | 5.844201 | Ferrocene | (NH4)S2O8 |
| fumarate    | succinate   | 4.867834 | Ferrocene | (NH4)S2O8 |
| fumarate    | succinic se | 1.863777 | Ferrocene | (NH4)S2O8 |
| malate      | pyruvate    | 9.790063 | Ferrocene | (NH4)S2O8 |
| succinate   | fumarate    | Inf      | Ferrocene | (NH4)S2O8 |
| succinate   | oxaloaceta  | Inf      | Ferrocene | (NH4)S2O8 |
| cis-aconita | oxaloaceta  | 1.746018 | Ferrocene | Na2SO4    |
