# Supplementary material
Source: PubMed Central journal article supplement (PMC5455955)
Supplement: NIHMS73005-supplement-Supplementary_Table_5.pdf [file NIHMS73005-supplement-Supplementary_Table_5.pdf]

| #  | Substrate | Product | Condition | Replicate | Final rate | Fitting moc | Comment              |
|----|-----------|---------|-----------|-----------|------------|-------------|----------------------|
| 1  | Aco       | Pyr     | control   | 1         |            |             | nd                   |
| 2  | Aco       | Pyr     | control   | 2         |            |             | nd                   |
| 3  | Aco       | Pyr     | control   | 3         |            |             | nd                   |
| 4  | Aco       | Ssa     | control   | 1         |            |             | nd                   |
| 5  | Aco       | Ssa     | control   | 2         |            |             | nd                   |
| 6  | Aco       | Ssa     | control   | 3         |            |             | nd                   |
| 7  | Aco       | Suc     | control   | 1         |            |             | no reliable decrease |
| 8  | Aco       | Suc     | control   | 2         |            |             | no reliable decrease |
| 9  | Aco       | Suc     | control   | 3         |            |             | no reliable decrease |
| 10 | Akg       | Akg     | control   | 1         | 0.029738   | linform     |                      |
| 11 | Akg       | Akg     | control   | 2         | 0.04689    | linform     |                      |
| 12 | Akg       | Akg     | control   | 3         | 0.013107   | linform     |                      |
| 13 | Akg       | Mal     | control   | 1         | -0.00096   | linform     |                      |
| 14 | Akg       | Mal     | control   | 2         | 0.000426   | linform     |                      |
| 15 | Akg       | Mal     | control   | 3         | 3.33E-05   | linform     |                      |
| 16 | Akg       | Pyr     | control   | 1         | 0.001645   | linform     |                      |
| 17 | Akg       | Pyr     | control   | 2         | -0.00096   | linform     |                      |
| 18 | Akg       | Pyr     | control   | 3         | -0.00072   | linform     |                      |
| 19 | Akg       | Suc     | control   | 1         | 0.004688   | linform     |                      |
| 20 | Akg       | Suc     | control   | 2         | 0.00456    | linform     |                      |
| 21 | Akg       | Suc     | control   | 3         | 0.003864   | linform     |                      |
| 22 | Cit       | Cit     | control   | 1         | 0.028822   | linform     | low qual             |
| 23 | Cit       | Cit     | control   | 2         | -0.00706   | linform     | low qual             |
| 24 | Cit       | Cit     | control   | 3         | 0.01378    | linform     | low qual             |
| 25 | Cit       | Pyr     | control   | 1         | -0.00031   | linform     | low qual             |
| 26 | Cit       | Pyr     | control   | 2         | 0.000419   | linform     | low qual             |
| 27 | Cit       | Pyr     | control   | 3         | 0.001868   | linform     | low qual             |
| 28 | Cit       | Suc     | control   | 1         | 0.000888   | linform     |                      |
| 29 | Cit       | Suc     | control   | 2         | 0.000625   | linform     |                      |
| 30 | Cit       | Suc     | control   | 3         | 0.000565   | linform     |                      |
| 31 | Fum       | Fum     | control   | 1         | 0.035833   | linform     |                      |
| 32 | Fum       | Fum     | control   | 2         | 0.020377   | linform     |                      |
| 33 | Fum       | Fum     | control   | 3         | 0.032688   | linform     |                      |
| 34 | Fum       | Pyr     | control   | 1         | -0.00141   | linform     |                      |
| 35 | Fum       | Pyr     | control   | 2         | 0.000866   | linform     |                      |
| 36 | Fum       | Pyr     | control   | 3         | 0.000273   | linform     |                      |
| 37 | Fum       | Suc     | control   | 1         | 0.003595   | linform     |                      |
| 38 | Fum       | Suc     | control   | 2         | 0.000524   | linform     |                      |
| 39 | Fum       | Suc     | control   | 3         | 0.000354   | linform     |                      |
| 40 | Iso       | Aco     | control   | 1         | 8.89E-05   | linform     | unreliable           |
| 41 | Iso       | Aco     | control   | 2         | 0.00063    | linform     | unreliable           |
| 42 | Iso       | Aco     | control   | 3         | 0.000711   | linform     | unreliable           |
| 43 | Iso       | Akg     | control   | 1         |            |             | nd                   |
| 44 | Iso       | Akg     | control   | 2         |            |             | nd                   |
| 45 | Iso       | Akg     | control   | 3         |            |             | nd                   |
| 46 | Iso       | Cit     | control   | 1         | -0.0076    | nlform      |                      |

|    |     |     |            |   |          |         |             |
|----|-----|-----|------------|---|----------|---------|-------------|
| 47 | Iso | Cit | control    | 2 | -0.00451 | nlform  |             |
| 48 | Iso | Cit | control    | 3 | -0.00721 | nlform  |             |
| 49 | Iso | Pyr | control    | 1 |          |         | nd          |
| 50 | Iso | Pyr | control    | 2 |          |         | nd          |
| 51 | Iso | Pyr | control    | 3 |          |         | nd          |
| 52 | Iso | Ssa | control    | 1 |          |         | nd          |
| 53 | Iso | Ssa | control    | 2 |          |         | nd          |
| 54 | Iso | Ssa | control    | 3 |          |         | nd          |
| 55 | Iso | Suc | control    | 1 |          |         | nd          |
| 56 | Iso | Suc | control    | 2 |          |         | nd          |
| 57 | Iso | Suc | control    | 3 |          |         | nd          |
| 58 | Mal | Mal | control    | 1 | -0.0094  | linform |             |
| 59 | Mal | Mal | control    | 2 | 0.052024 | linform |             |
| 60 | Mal | Mal | control    | 3 | 0.000455 | linform |             |
| 61 | Mal | Pyr | control    | 1 | -0.00119 | linform |             |
| 62 | Mal | Pyr | control    | 2 | 0.000724 | linform |             |
| 63 | Mal | Pyr | control    | 3 | -0.00116 | linform |             |
| 64 | Mal | Suc | control    | 1 | -0.00045 | linform |             |
| 65 | Mal | Suc | control    | 2 | 0.000804 | linform |             |
| 66 | Mal | Suc | control    | 3 | 0.00109  | linform |             |
| 67 | Suc | Aco | control    | 1 | 0.00669  | exdc    |             |
| 68 | Suc | Aco | control    | 2 | 0.002608 | exdc    |             |
| 69 | Suc | Aco | control    | 3 | 0.001964 | exdc    |             |
| 70 | Suc | Pyr | control    | 1 | 7.48E-05 | linform |             |
| 71 | Suc | Pyr | control    | 2 | 0.0009   | linform |             |
| 72 | Suc | Pyr | control    | 3 | -0.00038 | linform |             |
| 73 | Suc | Suc | control    | 1 |          |         | nd          |
| 74 | Suc | Suc | control    | 1 |          |         | nd          |
| 75 | Suc | Suc | control    | 2 |          |         | nd          |
| 76 | Suc | Suc | control    | 2 |          |         | nd          |
| 77 | Suc | Suc | control    | 3 |          |         | nd          |
| 78 | Suc | Suc | control    | 3 |          |         | nd          |
| 79 | Aco | Pyr | peroxydisu | 1 | 0.005553 | linform |             |
| 80 | Aco | Pyr | peroxydisu | 2 | 0.005477 | linform |             |
| 81 | Aco | Pyr | peroxydisu | 3 | 0.008421 | linform |             |
| 82 | Aco | Ssa | peroxydisu | 1 | 6.95E-07 | linform | low quality |
| 83 | Aco | Ssa | peroxydisu | 2 | 2.97E-07 | linform | low quality |
| 84 | Aco | Ssa | peroxydisu | 3 | 3.97E-07 | linform | low quality |
| 85 | Aco | Suc | peroxydisu | 1 | -0.01485 | linform |             |
| 86 | Aco | Suc | peroxydisu | 2 | -0.03033 | linform |             |
| 87 | Aco | Suc | peroxydisu | 3 | -0.01879 | linform |             |
| 88 | Akg | Akg | peroxydisu | 1 | -0.1755  | linform |             |
| 89 | Akg | Akg | peroxydisu | 2 | -0.2187  | linform |             |
| 90 | Akg | Akg | peroxydisu | 3 | -0.1748  | linform |             |
| 91 | Akg | Mal | peroxydisu | 1 | 0.009416 | linform |             |
| 92 | Akg | Mal | peroxydisu | 2 | 0.007637 | linform |             |
| 93 | Akg | Mal | peroxydisu | 3 | 0.007265 | linform |             |

|     |     |     |            |   |           |         |            |
|-----|-----|-----|------------|---|-----------|---------|------------|
| 94  | Akg | Pyr | peroxydisu | 1 | 0.044902  | nlform  |            |
| 95  | Akg | Pyr | peroxydisu | 2 | 0.0501    | nlform  |            |
| 96  | Akg | Pyr | peroxydisu | 3 | 0.048099  | nlform  |            |
| 97  | Akg | Suc | peroxydisu | 1 | 0.438108  | nlform  |            |
| 98  | Akg | Suc | peroxydisu | 2 | 0.494169  | nlform  |            |
| 99  | Akg | Suc | peroxydisu | 3 | 0.438063  | nlform  |            |
| 100 | Cit | Cit | peroxydisu | 1 | 0.011897  | linform | low qual   |
| 101 | Cit | Cit | peroxydisu | 2 | -0.00107  | linform | low qual   |
| 102 | Cit | Cit | peroxydisu | 3 | 0.002211  | linform | low qual   |
| 103 | Cit | Pyr | peroxydisu | 1 | 0.001279  | linform | low qual   |
| 104 | Cit | Pyr | peroxydisu | 2 | 0.002819  | linform | low qual   |
| 105 | Cit | Pyr | peroxydisu | 3 | 0.002948  | linform | low qual   |
| 106 | Cit | Suc | peroxydisu | 1 | 0.00182   | linform |            |
| 107 | Cit | Suc | peroxydisu | 2 | 0.001464  | linform |            |
| 108 | Cit | Suc | peroxydisu | 3 | -0.00095  | linform |            |
| 109 | Fum | Fum | peroxydisu | 1 | -1.50185  | nlform  |            |
| 110 | Fum | Fum | peroxydisu | 2 | -1.41881  | nlform  |            |
| 111 | Fum | Fum | peroxydisu | 3 | -1.44352  | nlform  |            |
| 112 | Fum | Pyr | peroxydisu | 1 | 0.009846  | linform |            |
| 113 | Fum | Pyr | peroxydisu | 2 | 0.013241  | linform |            |
| 114 | Fum | Pyr | peroxydisu | 3 | 0.00952   | linform |            |
| 115 | Fum | Suc | peroxydisu | 1 | 0.01011   | nlform  |            |
| 116 | Fum | Suc | peroxydisu | 2 | 0.004004  | nlform  |            |
| 117 | Fum | Suc | peroxydisu | 3 | 0.002536  | nlform  |            |
| 118 | Iso | Aco | peroxydisu | 1 | -3.00E-05 | linform | unreliable |
| 119 | Iso | Aco | peroxydisu | 2 | -4.87E-06 | linform | unreliable |
| 120 | Iso | Aco | peroxydisu | 3 | -3.52E-05 | linform | unreliable |
| 121 | Iso | Akg | peroxydisu | 1 | 0.007321  | linform |            |
| 122 | Iso | Akg | peroxydisu | 2 | 0.007642  | linform |            |
| 123 | Iso | Akg | peroxydisu | 3 | 0.006636  | linform |            |
| 124 | Iso | Cit | peroxydisu | 1 | -0.07131  | nlform  |            |
| 125 | Iso | Cit | peroxydisu | 2 | -0.06936  | nlform  |            |
| 126 | Iso | Cit | peroxydisu | 3 | -0.06279  | nlform  |            |
| 127 | Iso | Pyr | peroxydisu | 1 | 0.009748  | linform |            |
| 128 | Iso | Pyr | peroxydisu | 2 | 0.013362  | linform |            |
| 129 | Iso | Pyr | peroxydisu | 3 | 0.00979   | linform |            |
| 130 | Iso | Ssa | peroxydisu | 1 | 2.68E-05  | linform |            |
| 131 | Iso | Ssa | peroxydisu | 2 | 7.13E-05  | linform |            |
| 132 | Iso | Ssa | peroxydisu | 3 | 2.24E-05  | linform |            |
| 133 | Iso | Suc | peroxydisu | 1 | 0.084718  | nlform  |            |
| 134 | Iso | Suc | peroxydisu | 2 | 0.0831    | nlform  |            |
| 135 | Iso | Suc | peroxydisu | 3 | 0.05253   | nlform  |            |
| 136 | Mal | Mal | peroxydisu | 1 | -0.18451  | linform |            |
| 137 | Mal | Mal | peroxydisu | 2 | -0.24198  | linform |            |
| 138 | Mal | Mal | peroxydisu | 3 | -0.16712  | linform |            |
| 139 | Mal | Pyr | peroxydisu | 1 | 0.262853  | linform |            |
| 140 | Mal | Pyr | peroxydisu | 2 | 0.380588  | linform |            |

|     |     |     |            |   |           |         |                      |
|-----|-----|-----|------------|---|-----------|---------|----------------------|
| 141 | Mal | Pyr | peroxydisu | 3 | 0.377526  | linform |                      |
| 142 | Mal | Suc | peroxydisu | 1 | 0.002589  | linform |                      |
| 143 | Mal | Suc | peroxydisu | 2 | 0.001653  | linform |                      |
| 144 | Mal | Suc | peroxydisu | 3 | 0.003283  | linform |                      |
| 145 | Suc | Aco | peroxydisu | 1 | 0.017124  | exdc    |                      |
| 146 | Suc | Aco | peroxydisu | 2 | 0.021769  | exdc    |                      |
| 147 | Suc | Aco | peroxydisu | 3 | 0.01611   | exdc    |                      |
| 148 | Suc | Pyr | peroxydisu | 1 | 0.047347  | linform |                      |
| 149 | Suc | Pyr | peroxydisu | 2 | 0.048926  | linform |                      |
| 150 | Suc | Pyr | peroxydisu | 3 | 0.046438  | linform |                      |
| 151 | Suc | Suc | peroxydisu | 1 | 2.51E-06  | linform |                      |
| 152 | Suc | Suc | peroxydisu | 1 | 0.002248  | linform |                      |
| 153 | Suc | Suc | peroxydisu | 2 | 4.46E-06  | linform |                      |
| 154 | Suc | Suc | peroxydisu | 2 | 0.00272   | linform |                      |
| 155 | Suc | Suc | peroxydisu | 3 | 2.06E-06  | linform |                      |
| 156 | Suc | Suc | peroxydisu | 3 | 0.001812  | linform |                      |
| 157 | Aco | Pyr | peroxydisu | 1 | 0.003598  | linform |                      |
| 158 | Aco | Pyr | peroxydisu | 2 | 0.003216  | linform |                      |
| 159 | Aco | Pyr | peroxydisu | 3 | 0.003244  | linform |                      |
| 160 | Aco | Ssa | peroxydisu | 1 |           |         | nd                   |
| 161 | Aco | Ssa | peroxydisu | 2 |           |         | nd                   |
| 162 | Aco | Ssa | peroxydisu | 3 |           |         | nd                   |
| 163 | Aco | Suc | peroxydisu | 1 |           |         | no reliable decrease |
| 164 | Aco | Suc | peroxydisu | 2 |           |         | no reliable decrease |
| 165 | Aco | Suc | peroxydisu | 3 |           |         | no reliable decrease |
| 166 | Akg | Akg | peroxydisu | 1 | 0.055254  | linform |                      |
| 167 | Akg | Akg | peroxydisu | 2 | 0.076368  | linform |                      |
| 168 | Akg | Akg | peroxydisu | 3 | 0.052658  | linform |                      |
| 169 | Akg | Mal | peroxydisu | 1 | -0.00126  | linform |                      |
| 170 | Akg | Mal | peroxydisu | 2 | 0.000487  | linform |                      |
| 171 | Akg | Mal | peroxydisu | 3 | -0.00048  | linform |                      |
| 172 | Akg | Pyr | peroxydisu | 1 | -0.00116  | linform |                      |
| 173 | Akg | Pyr | peroxydisu | 2 | 0.000869  | linform |                      |
| 174 | Akg | Pyr | peroxydisu | 3 | 0.001748  | linform |                      |
| 175 | Akg | Suc | peroxydisu | 1 | 0.03015   | linform |                      |
| 176 | Akg | Suc | peroxydisu | 2 | 0.007146  | linform |                      |
| 177 | Akg | Suc | peroxydisu | 3 | 0.028147  | linform |                      |
| 178 | Cit | Cit | peroxydisu | 1 | 0.024614  | linform | low qual             |
| 179 | Cit | Cit | peroxydisu | 2 | -2.49E-05 | linform | low qual             |
| 180 | Cit | Cit | peroxydisu | 3 | 0.004818  | linform | low qual             |
| 181 | Cit | Pyr | peroxydisu | 1 | 0.00231   | linform | low qual             |
| 182 | Cit | Pyr | peroxydisu | 2 | 0.00241   | linform | low qual             |
| 183 | Cit | Pyr | peroxydisu | 3 | 0.001769  | linform | low qual             |
| 184 | Cit | Suc | peroxydisu | 1 | -0.00026  | linform |                      |
| 185 | Cit | Suc | peroxydisu | 2 | -0.00014  | linform |                      |
| 186 | Cit | Suc | peroxydisu | 3 | 0.000095  | linform |                      |
| 187 | Fum | Fum | peroxydisu | 1 | -1.96032  | nlform  |                      |

|     |     |     |            |   |           |         |            |
|-----|-----|-----|------------|---|-----------|---------|------------|
| 188 | Fum | Fum | peroxydisu | 2 | -1.77137  | nlform  |            |
| 189 | Fum | Fum | peroxydisu | 3 | -1.93382  | nlform  |            |
| 190 | Fum | Pyr | peroxydisu | 1 | -0.0008   | linform |            |
| 191 | Fum | Pyr | peroxydisu | 2 | -0.00573  | linform |            |
| 192 | Fum | Pyr | peroxydisu | 3 | 0.001874  | linform |            |
| 193 | Fum | Suc | peroxydisu | 1 | -0.00142  | linform |            |
| 194 | Fum | Suc | peroxydisu | 2 | 0.000899  | linform |            |
| 195 | Fum | Suc | peroxydisu | 3 | 0.000366  | linform |            |
| 196 | Iso | Aco | peroxydisu | 1 | 0.000267  | linform | unreliable |
| 197 | Iso | Aco | peroxydisu | 2 | 0.000232  | linform | unreliable |
| 198 | Iso | Aco | peroxydisu | 3 | 0.000374  | linform | unreliable |
| 199 | Iso | Akg | peroxydisu | 1 |           |         | nd         |
| 200 | Iso | Akg | peroxydisu | 2 |           |         | nd         |
| 201 | Iso | Akg | peroxydisu | 3 |           |         | nd         |
| 202 | Iso | Cit | peroxydisu | 1 | -0.04942  | nlform  |            |
| 203 | Iso | Cit | peroxydisu | 2 | -0.04104  | nlform  |            |
| 204 | Iso | Cit | peroxydisu | 3 | -0.03599  | nlform  |            |
| 205 | Iso | Pyr | peroxydisu | 1 | 0.000226  | linform |            |
| 206 | Iso | Pyr | peroxydisu | 2 | 0.00053   | linform |            |
| 207 | Iso | Pyr | peroxydisu | 3 | 0.002076  | linform |            |
| 208 | Iso | Ssa | peroxydisu | 1 | 2.71E-05  | linform |            |
| 209 | Iso | Ssa | peroxydisu | 2 | 2.27E-05  | linform |            |
| 210 | Iso | Ssa | peroxydisu | 3 | 2.15E-05  | linform |            |
| 211 | Iso | Suc | peroxydisu | 1 | 0.006307  | nlform  |            |
| 212 | Iso | Suc | peroxydisu | 2 | 0.007355  | nlform  |            |
| 213 | Iso | Suc | peroxydisu | 3 | 0.002788  | nlform  |            |
| 214 | Mal | Mal | peroxydisu | 1 | 0.118417  | linform |            |
| 215 | Mal | Mal | peroxydisu | 2 | 0.044913  | linform |            |
| 216 | Mal | Mal | peroxydisu | 3 | 0.103536  | linform |            |
| 217 | Mal | Pyr | peroxydisu | 1 | 0.003446  | linform |            |
| 218 | Mal | Pyr | peroxydisu | 2 | 0.002643  | linform |            |
| 219 | Mal | Pyr | peroxydisu | 3 | 0.003582  | linform |            |
| 220 | Mal | Suc | peroxydisu | 1 | 0.000311  | linform |            |
| 221 | Mal | Suc | peroxydisu | 2 | -1.20E-05 | linform |            |
| 222 | Mal | Suc | peroxydisu | 3 | -9.86E-05 | linform |            |
| 223 | Suc | Aco | peroxydisu | 1 |           |         | nd         |
| 224 | Suc | Aco | peroxydisu | 2 |           |         | nd         |
| 225 | Suc | Aco | peroxydisu | 3 |           |         | nd         |
| 226 | Suc | Pyr | peroxydisu | 1 | 0.005104  | linform |            |
| 227 | Suc | Pyr | peroxydisu | 2 | 0.004016  | linform |            |
| 228 | Suc | Pyr | peroxydisu | 3 | 0.003442  | linform |            |
| 229 | Suc | Suc | peroxydisu | 1 | 6.55E-06  | linform |            |
| 230 | Suc | Suc | peroxydisu | 1 | 0.000276  | linform |            |
| 231 | Suc | Suc | peroxydisu | 2 | 7.85E-06  | linform |            |
| 232 | Suc | Suc | peroxydisu | 2 | 0.000434  | linform |            |
| 233 | Suc | Suc | peroxydisu | 3 | 3.95E-06  | linform |            |
| 234 | Suc | Suc | peroxydisu | 3 | 0.000195  | linform |            |

|     |     |     |            |   |          |         |                      |
|-----|-----|-----|------------|---|----------|---------|----------------------|
| 235 | Aco | Pyr | peroxydisu | 1 | 0.00837  | linform |                      |
| 236 | Aco | Pyr | peroxydisu | 2 | 0.006079 | linform |                      |
| 237 | Aco | Pyr | peroxydisu | 3 | 0.008468 | linform |                      |
| 238 | Aco | Ssa | peroxydisu | 1 | 1.19E-06 | linform | low quality          |
| 239 | Aco | Ssa | peroxydisu | 2 | 6.26E-07 | linform | low quality          |
| 240 | Aco | Ssa | peroxydisu | 3 | 2.28E-07 | linform | low quality          |
| 241 | Aco | Suc | peroxydisu | 1 |          |         | no reliable decrease |
| 242 | Aco | Suc | peroxydisu | 2 |          |         | no reliable decrease |
| 243 | Aco | Suc | peroxydisu | 3 |          |         | no reliable decrease |
| 244 | Akg | Akg | peroxydisu | 1 | -0.07265 | linform |                      |
| 245 | Akg | Akg | peroxydisu | 2 | -0.04245 | linform |                      |
| 246 | Akg | Akg | peroxydisu | 3 | -0.10556 | linform |                      |
| 247 | Akg | Mal | peroxydisu | 1 | 0.006096 | linform |                      |
| 248 | Akg | Mal | peroxydisu | 2 | 0.00384  | linform |                      |
| 249 | Akg | Mal | peroxydisu | 3 | 0.001755 | linform |                      |
| 250 | Akg | Pyr | peroxydisu | 1 | 0.058946 | nlform  |                      |
| 251 | Akg | Pyr | peroxydisu | 2 | 0.058238 | nlform  |                      |
| 252 | Akg | Pyr | peroxydisu | 3 | 0.044174 | nlform  |                      |
| 253 | Akg | Suc | peroxydisu | 1 | 0.387414 | nlform  |                      |
| 254 | Akg | Suc | peroxydisu | 2 | 0.404046 | nlform  |                      |
| 255 | Akg | Suc | peroxydisu | 3 | 0.318542 | nlform  |                      |
| 256 | Cit | Cit | peroxydisu | 1 | 0.054369 | linform | low qual             |
| 257 | Cit | Cit | peroxydisu | 2 | 0.001441 | linform | low qual             |
| 258 | Cit | Cit | peroxydisu | 3 | 0.004039 | linform | low qual             |
| 259 | Cit | Pyr | peroxydisu | 1 | 0.00018  | linform | low qual             |
| 260 | Cit | Pyr | peroxydisu | 2 | 0.002926 | linform | low qual             |
| 261 | Cit | Pyr | peroxydisu | 3 | 0.003554 | linform | low qual             |
| 262 | Cit | Suc | peroxydisu | 1 | 0.000846 | linform |                      |
| 263 | Cit | Suc | peroxydisu | 2 | 0.001036 | linform |                      |
| 264 | Cit | Suc | peroxydisu | 3 | 0.000681 | linform |                      |
| 265 | Fum | Fum | peroxydisu | 1 | -0.92355 | nlform  |                      |
| 266 | Fum | Fum | peroxydisu | 2 | -0.92612 | nlform  |                      |
| 267 | Fum | Fum | peroxydisu | 3 | -0.81325 | nlform  |                      |
| 268 | Fum | Pyr | peroxydisu | 1 | 0.00242  | linform |                      |
| 269 | Fum | Pyr | peroxydisu | 2 | 0.00325  | linform |                      |
| 270 | Fum | Pyr | peroxydisu | 3 | 0.003598 | linform |                      |
| 271 | Fum | Suc | peroxydisu | 1 | 0.000702 | linform |                      |
| 272 | Fum | Suc | peroxydisu | 2 | 0.002509 | linform |                      |
| 273 | Fum | Suc | peroxydisu | 3 | 0.001886 | linform |                      |
| 274 | Iso | Aco | peroxydisu | 1 | 0.000222 | linform | unreliable           |
| 275 | Iso | Aco | peroxydisu | 2 | 0.000173 | linform | unreliable           |
| 276 | Iso | Aco | peroxydisu | 3 | 0.000107 | linform | unreliable           |
| 277 | Iso | Akg | peroxydisu | 1 | 0.003992 | linform |                      |
| 278 | Iso | Akg | peroxydisu | 2 | 0.003424 | linform |                      |
| 279 | Iso | Akg | peroxydisu | 3 | 0.004034 | linform |                      |
| 280 | Iso | Cit | peroxydisu | 1 | -0.05737 | nlform  |                      |
| 281 | Iso | Cit | peroxydisu | 2 | -0.06204 | nlform  |                      |

|     |     |     |            |   |          |         |                      |
|-----|-----|-----|------------|---|----------|---------|----------------------|
| 282 | Iso | Cit | peroxydisu | 3 | -0.0563  | nlform  |                      |
| 283 | Iso | Pyr | peroxydisu | 1 | 0.00667  | linform |                      |
| 284 | Iso | Pyr | peroxydisu | 2 | 0.006648 | linform |                      |
| 285 | Iso | Pyr | peroxydisu | 3 | 0.006423 | linform |                      |
| 286 | Iso | Ssa | peroxydisu | 1 | 3.09E-05 | linform |                      |
| 287 | Iso | Ssa | peroxydisu | 2 | 3.88E-05 | linform |                      |
| 288 | Iso | Ssa | peroxydisu | 3 | 2.46E-05 | linform |                      |
| 289 | Iso | Suc | peroxydisu | 1 | 0.041464 | nlform  |                      |
| 290 | Iso | Suc | peroxydisu | 2 | 0.087802 | nlform  |                      |
| 291 | Iso | Suc | peroxydisu | 3 | 0.036189 | nlform  |                      |
| 292 | Mal | Mal | peroxydisu | 1 | -0.03914 | linform |                      |
| 293 | Mal | Mal | peroxydisu | 2 | -0.04933 | linform |                      |
| 294 | Mal | Mal | peroxydisu | 3 | -0.02194 | linform |                      |
| 295 | Mal | Pyr | peroxydisu | 1 | 0.095974 | linform |                      |
| 296 | Mal | Pyr | peroxydisu | 2 | 0.124043 | linform |                      |
| 297 | Mal | Pyr | peroxydisu | 3 | 0.099042 | linform |                      |
| 298 | Mal | Suc | peroxydisu | 1 | 0.001563 | linform |                      |
| 299 | Mal | Suc | peroxydisu | 2 | 0.003768 | linform |                      |
| 300 | Mal | Suc | peroxydisu | 3 | 0.000798 | linform |                      |
| 301 | Suc | Aco | peroxydisu | 1 |          |         | nd                   |
| 302 | Suc | Aco | peroxydisu | 2 | 0.005055 | exdc    |                      |
| 303 | Suc | Aco | peroxydisu | 3 | 0.007866 | exdc    |                      |
| 304 | Suc | Pyr | peroxydisu | 1 | 0.017116 | linform |                      |
| 305 | Suc | Pyr | peroxydisu | 2 | 0.018588 | linform |                      |
| 306 | Suc | Pyr | peroxydisu | 3 | 0.019223 | linform |                      |
| 307 | Suc | Suc | peroxydisu | 1 | 8.71E-06 | linform |                      |
| 308 | Suc | Suc | peroxydisu | 1 | 0.002091 | linform |                      |
| 309 | Suc | Suc | peroxydisu | 2 | 8.78E-06 | linform |                      |
| 310 | Suc | Suc | peroxydisu | 2 | 0.002198 | linform |                      |
| 311 | Suc | Suc | peroxydisu | 3 | 2.77E-06 | linform |                      |
| 312 | Suc | Suc | peroxydisu | 3 | 0.001372 | linform |                      |
| 313 | Aco | Pyr | hydrogen ç | 1 |          |         | nd                   |
| 314 | Aco | Pyr | hydrogen ç | 2 |          |         | nd                   |
| 315 | Aco | Pyr | hydrogen ç | 3 |          |         | nd                   |
| 316 | Aco | Ssa | hydrogen ç | 1 |          |         | nd                   |
| 317 | Aco | Ssa | hydrogen ç | 2 |          |         | nd                   |
| 318 | Aco | Ssa | hydrogen ç | 3 |          |         | nd                   |
| 319 | Aco | Suc | hydrogen ç | 1 |          |         | no reliable decrease |
| 320 | Aco | Suc | hydrogen ç | 2 |          |         | no reliable decrease |
| 321 | Aco | Suc | hydrogen ç | 3 |          |         | no reliable decrease |
| 322 | Akg | Akg | hydrogen ç | 1 | -0.00203 | linform |                      |
| 323 | Akg | Akg | hydrogen ç | 2 | 0.000702 | linform |                      |
| 324 | Akg | Akg | hydrogen ç | 3 | 0.004521 | linform |                      |
| 325 | Akg | Mal | hydrogen ç | 1 | -0.00043 | linform |                      |
| 326 | Akg | Mal | hydrogen ç | 2 | -0.00094 | linform |                      |
| 327 | Akg | Mal | hydrogen ç | 3 | 0.001937 | linform |                      |
| 328 | Akg | Pyr | hydrogen ç | 1 | -0.00115 | linform |                      |

|     |     |     |            |   |          |         |            |
|-----|-----|-----|------------|---|----------|---------|------------|
| 329 | Akg | Pyr | hydrogen ç | 2 | -0.00081 | linform |            |
| 330 | Akg | Pyr | hydrogen ç | 3 | 0.001688 | linform |            |
| 331 | Akg | Suc | hydrogen ç | 1 | 0.093769 | linform |            |
| 332 | Akg | Suc | hydrogen ç | 2 | 0.205736 | linform |            |
| 333 | Akg | Suc | hydrogen ç | 3 | 0.214886 | linform |            |
| 334 | Cit | Cit | hydrogen ç | 1 | 0.065146 | linform | low qual   |
| 335 | Cit | Cit | hydrogen ç | 2 | 0.001098 | linform | low qual   |
| 336 | Cit | Cit | hydrogen ç | 3 | 0.003153 | linform | low qual   |
| 337 | Cit | Pyr | hydrogen ç | 1 | -0.00128 | linform | low qual   |
| 338 | Cit | Pyr | hydrogen ç | 2 | -0.00158 | linform | low qual   |
| 339 | Cit | Pyr | hydrogen ç | 3 | -0.00112 | linform | low qual   |
| 340 | Cit | Suc | hydrogen ç | 1 | 6.14E-06 | linform |            |
| 341 | Cit | Suc | hydrogen ç | 2 | 0.000284 | linform |            |
| 342 | Cit | Suc | hydrogen ç | 3 | 0.000223 | linform |            |
| 343 | Fum | Fum | hydrogen ç | 1 | 0.54686  | linform |            |
| 344 | Fum | Fum | hydrogen ç | 2 | 0.131686 | linform |            |
| 345 | Fum | Fum | hydrogen ç | 3 | -0.01191 | linform |            |
| 346 | Fum | Pyr | hydrogen ç | 1 | 0.002109 | linform |            |
| 347 | Fum | Pyr | hydrogen ç | 2 | 0.001035 | linform |            |
| 348 | Fum | Pyr | hydrogen ç | 3 | -0.00071 | linform |            |
| 349 | Fum | Suc | hydrogen ç | 1 | 0.002566 | linform |            |
| 350 | Fum | Suc | hydrogen ç | 2 | 0.002287 | linform |            |
| 351 | Fum | Suc | hydrogen ç | 3 | 0.001005 | linform |            |
| 352 | Iso | Aco | hydrogen ç | 1 | 6.55E-05 | linform | unreliable |
| 353 | Iso | Aco | hydrogen ç | 2 | 8.62E-05 | linform | unreliable |
| 354 | Iso | Aco | hydrogen ç | 3 | 8.68E-05 | linform | unreliable |
| 355 | Iso | Akg | hydrogen ç | 1 |          |         | nd         |
| 356 | Iso | Akg | hydrogen ç | 2 |          |         | nd         |
| 357 | Iso | Akg | hydrogen ç | 3 |          |         | nd         |
| 358 | Iso | Cit | hydrogen ç | 1 | -0.02081 | nlform  |            |
| 359 | Iso | Cit | hydrogen ç | 2 | -0.00242 | nlform  |            |
| 360 | Iso | Cit | hydrogen ç | 3 | -0.00727 | nlform  |            |
| 361 | Iso | Pyr | hydrogen ç | 1 |          |         | nd         |
| 362 | Iso | Pyr | hydrogen ç | 2 |          |         | nd         |
| 363 | Iso | Pyr | hydrogen ç | 3 |          |         | nd         |
| 364 | Iso | Ssa | hydrogen ç | 1 |          |         | nd         |
| 365 | Iso | Ssa | hydrogen ç | 2 |          |         | nd         |
| 366 | Iso | Ssa | hydrogen ç | 3 |          |         | nd         |
| 367 | Iso | Suc | hydrogen ç | 1 | -0.00121 | nlform  |            |
| 368 | Iso | Suc | hydrogen ç | 2 | 0.000358 | nlform  |            |
| 369 | Iso | Suc | hydrogen ç | 3 | 0.000148 | nlform  |            |
| 370 | Mal | Mal | hydrogen ç | 1 | 0.040324 | linform |            |
| 371 | Mal | Mal | hydrogen ç | 2 | 0.080925 | linform |            |
| 372 | Mal | Mal | hydrogen ç | 3 | 0.085346 | linform |            |
| 373 | Mal | Pyr | hydrogen ç | 1 | 0.002009 | linform |            |
| 374 | Mal | Pyr | hydrogen ç | 2 | -0.0008  | linform |            |
| 375 | Mal | Pyr | hydrogen ç | 3 | 0.00325  | linform |            |



|     |     |     |            |   |           |         |                      |
|-----|-----|-----|------------|---|-----------|---------|----------------------|
| 376 | Mal | Suc | hydrogen p | 1 | 0.000996  | linform |                      |
| 377 | Mal | Suc | hydrogen p | 2 | 0.000896  | linform |                      |
| 378 | Mal | Suc | hydrogen p | 3 | 8.70E-05  | linform |                      |
| 379 | Suc | Aco | hydrogen p | 1 | 0.013674  | exdc    |                      |
| 380 | Suc | Aco | hydrogen p | 2 | 0.012143  | exdc    |                      |
| 381 | Suc | Aco | hydrogen p | 3 | 0.008535  | exdc    |                      |
| 382 | Suc | Pyr | hydrogen p | 1 |           |         | nd                   |
| 383 | Suc | Pyr | hydrogen p | 2 |           |         | nd                   |
| 384 | Suc | Pyr | hydrogen p | 3 |           |         | nd                   |
| 385 | Suc | Suc | hydrogen p | 1 |           |         | nd                   |
| 386 | Suc | Suc | hydrogen p | 1 | 0.000315  | linform |                      |
| 387 | Suc | Suc | hydrogen p | 2 |           |         | nd                   |
| 388 | Suc | Suc | hydrogen p | 2 | 0.000167  | linform |                      |
| 389 | Suc | Suc | hydrogen p | 3 |           |         | nd                   |
| 390 | Suc | Suc | hydrogen p | 3 | 0.000201  | linform |                      |
| 391 | Aco | Pyr | hydrogen p | 1 |           |         | nd                   |
| 392 | Aco | Pyr | hydrogen p | 2 |           |         | nd                   |
| 393 | Aco | Pyr | hydrogen p | 3 |           |         | nd                   |
| 394 | Aco | Ssa | hydrogen p | 1 |           |         | nd                   |
| 395 | Aco | Ssa | hydrogen p | 2 |           |         | nd                   |
| 396 | Aco | Ssa | hydrogen p | 3 |           |         | nd                   |
| 397 | Aco | Suc | hydrogen p | 1 |           |         | no reliable decrease |
| 398 | Aco | Suc | hydrogen p | 2 |           |         | no reliable decrease |
| 399 | Aco | Suc | hydrogen p | 3 |           |         | no reliable decrease |
| 400 | Akg | Akg | hydrogen p | 1 | 0.005462  | linform |                      |
| 401 | Akg | Akg | hydrogen p | 2 | -0.01542  | linform |                      |
| 402 | Akg | Akg | hydrogen p | 3 | 0.011416  | linform |                      |
| 403 | Akg | Mal | hydrogen p | 1 | -0.00306  | linform |                      |
| 404 | Akg | Mal | hydrogen p | 2 | -0.00127  | linform |                      |
| 405 | Akg | Mal | hydrogen p | 3 | -0.00062  | linform |                      |
| 406 | Akg | Pyr | hydrogen p | 1 | -0.00099  | linform |                      |
| 407 | Akg | Pyr | hydrogen p | 2 | 0.000287  | linform |                      |
| 408 | Akg | Pyr | hydrogen p | 3 | 0.001601  | linform |                      |
| 409 | Akg | Suc | hydrogen p | 1 | 0.069192  | linform |                      |
| 410 | Akg | Suc | hydrogen p | 2 | -0.01891  | linform |                      |
| 411 | Akg | Suc | hydrogen p | 3 | 0.100414  | linform |                      |
| 412 | Cit | Cit | hydrogen p | 1 | 0.024689  | linform | low qual             |
| 413 | Cit | Cit | hydrogen p | 2 | -8.03E-06 | linform | low qual             |
| 414 | Cit | Cit | hydrogen p | 3 | 0.005166  | linform | low qual             |
| 415 | Cit | Pyr | hydrogen p | 1 | -0.00208  | linform | low qual             |
| 416 | Cit | Pyr | hydrogen p | 2 | 0.000414  | linform | low qual             |
| 417 | Cit | Pyr | hydrogen p | 3 | -0.00086  | linform | low qual             |
| 418 | Cit | Suc | hydrogen p | 1 | -3.47E-05 | linform |                      |
| 419 | Cit | Suc | hydrogen p | 2 | 0.000114  | linform |                      |
| 420 | Cit | Suc | hydrogen p | 3 | 0.000661  | linform |                      |
| 421 | Fum | Fum | hydrogen p | 1 | 0.072776  | linform |                      |
| 422 | Fum | Fum | hydrogen p | 2 | 0.098182  | linform |                      |

|     |     |     |            |   |           |         |             |
|-----|-----|-----|------------|---|-----------|---------|-------------|
| 423 | Fum | Fum | hydrogen ç | 3 | 0.022677  | linform |             |
| 424 | Fum | Pyr | hydrogen ç | 1 | -0.00036  | linform |             |
| 425 | Fum | Pyr | hydrogen ç | 2 | 0.000438  | linform |             |
| 426 | Fum | Pyr | hydrogen ç | 3 | 0.00069   | linform |             |
| 427 | Fum | Suc | hydrogen ç | 1 | 0.003474  | linform |             |
| 428 | Fum | Suc | hydrogen ç | 2 | 0.000988  | linform |             |
| 429 | Fum | Suc | hydrogen ç | 3 | 0.00097   | linform |             |
| 430 | Iso | Aco | hydrogen ç | 1 | -4.99E-06 | linform | unreliable  |
| 431 | Iso | Aco | hydrogen ç | 2 | 4.52E-05  | linform | unreliable  |
| 432 | Iso | Aco | hydrogen ç | 3 | 3.21E-05  | linform | unreliable  |
| 433 | Iso | Akg | hydrogen ç | 1 |           |         | nd          |
| 434 | Iso | Akg | hydrogen ç | 2 |           |         | nd          |
| 435 | Iso | Akg | hydrogen ç | 3 |           |         | nd          |
| 436 | Iso | Cit | hydrogen ç | 1 | -0.0244   | nlform  |             |
| 437 | Iso | Cit | hydrogen ç | 2 | -0.01887  | nlform  |             |
| 438 | Iso | Cit | hydrogen ç | 3 | -0.02529  | nlform  |             |
| 439 | Iso | Pyr | hydrogen ç | 1 |           |         | nd          |
| 440 | Iso | Pyr | hydrogen ç | 2 |           |         | nd          |
| 441 | Iso | Pyr | hydrogen ç | 3 |           |         | nd          |
| 442 | Iso | Ssa | hydrogen ç | 1 |           |         | nd          |
| 443 | Iso | Ssa | hydrogen ç | 2 |           |         | nd          |
| 444 | Iso | Ssa | hydrogen ç | 3 |           |         | nd          |
| 445 | Iso | Suc | hydrogen ç | 1 | 0.000857  | nlform  |             |
| 446 | Iso | Suc | hydrogen ç | 2 | 0.000103  | nlform  |             |
| 447 | Iso | Suc | hydrogen ç | 3 | 1.56E-05  | lform   |             |
| 448 | Mal | Mal | hydrogen ç | 1 | 0.070443  | linform |             |
| 449 | Mal | Mal | hydrogen ç | 2 | 0.115035  | linform |             |
| 450 | Mal | Mal | hydrogen ç | 3 | 0.026317  | linform |             |
| 451 | Mal | Pyr | hydrogen ç | 1 | -0.00082  | linform |             |
| 452 | Mal | Pyr | hydrogen ç | 2 | -0.0004   | linform |             |
| 453 | Mal | Pyr | hydrogen ç | 3 | 0.000994  | linform |             |
| 454 | Mal | Suc | hydrogen ç | 1 | -0.00084  | linform |             |
| 455 | Mal | Suc | hydrogen ç | 2 | 0.000343  | linform |             |
| 456 | Mal | Suc | hydrogen ç | 3 | 0.000515  | linform |             |
| 457 | Suc | Aco | hydrogen ç | 1 | 0.003966  | exdc    |             |
| 458 | Suc | Aco | hydrogen ç | 2 | 0.015326  | exdc    |             |
| 459 | Suc | Aco | hydrogen ç | 3 | 0.021581  | exdc    |             |
| 460 | Suc | Pyr | hydrogen ç | 1 |           |         | nd          |
| 461 | Suc | Pyr | hydrogen ç | 2 |           |         | nd          |
| 462 | Suc | Pyr | hydrogen ç | 3 |           |         | nd          |
| 463 | Suc | Suc | hydrogen ç | 1 | 1.81E-07  | linform | low quality |
| 464 | Suc | Suc | hydrogen ç | 1 |           |         | nd          |
| 465 | Suc | Suc | hydrogen ç | 2 | 5.85E-07  | linform | low quality |
| 466 | Suc | Suc | hydrogen ç | 2 |           |         | nd          |
| 467 | Suc | Suc | hydrogen ç | 3 | 5.85E-07  | linform | low quality |
| 468 | Suc | Suc | hydrogen ç | 3 |           |         | nd          |
| 469 | Aco | Pyr | hydrogen ç | 1 |           |         | nd          |

|     |     |     |            |   |           |                      |
|-----|-----|-----|------------|---|-----------|----------------------|
| 470 | Aco | Pyr | hydrogen ç | 2 |           | nd                   |
| 471 | Aco | Pyr | hydrogen ç | 3 |           | nd                   |
| 472 | Aco | Ssa | hydrogen ç | 1 |           | nd                   |
| 473 | Aco | Ssa | hydrogen ç | 2 |           | nd                   |
| 474 | Aco | Ssa | hydrogen ç | 3 |           | nd                   |
| 475 | Aco | Suc | hydrogen ç | 1 |           | no reliable decrease |
| 476 | Aco | Suc | hydrogen ç | 2 |           | no reliable decrease |
| 477 | Aco | Suc | hydrogen ç | 3 |           | no reliable decrease |
| 478 | Akg | Akg | hydrogen ç | 1 | 0.010214  | linform              |
| 479 | Akg | Akg | hydrogen ç | 2 | 0.048385  | linform              |
| 480 | Akg | Akg | hydrogen ç | 3 | 0.016832  | linform              |
| 481 | Akg | Mal | hydrogen ç | 1 | 0.001194  | linform              |
| 482 | Akg | Mal | hydrogen ç | 2 | 0.002872  | linform              |
| 483 | Akg | Mal | hydrogen ç | 3 | 0.004257  | linform              |
| 484 | Akg | Pyr | hydrogen ç | 1 | -0.00218  | linform              |
| 485 | Akg | Pyr | hydrogen ç | 2 | -0.00046  | linform              |
| 486 | Akg | Pyr | hydrogen ç | 3 | -0.00068  | linform              |
| 487 | Akg | Suc | hydrogen ç | 1 | 0.07787   | linform              |
| 488 | Akg | Suc | hydrogen ç | 2 | 0.088904  | linform              |
| 489 | Akg | Suc | hydrogen ç | 3 | 0.145998  | linform              |
| 490 | Cit | Cit | hydrogen ç | 1 | 0.033828  | linform low qual     |
| 491 | Cit | Cit | hydrogen ç | 2 | 0.001663  | linform low qual     |
| 492 | Cit | Cit | hydrogen ç | 3 | 0.01456   | linform low qual     |
| 493 | Cit | Pyr | hydrogen ç | 1 | 0.000425  | linform low qual     |
| 494 | Cit | Pyr | hydrogen ç | 2 | 4.76E-05  | linform low qual     |
| 495 | Cit | Pyr | hydrogen ç | 3 | -0.00112  | linform low qual     |
| 496 | Cit | Suc | hydrogen ç | 1 | 0.000415  | linform              |
| 497 | Cit | Suc | hydrogen ç | 2 | 0.000168  | linform              |
| 498 | Cit | Suc | hydrogen ç | 3 | 0.000111  | linform              |
| 499 | Fum | Fum | hydrogen ç | 1 | 0.045535  | linform              |
| 500 | Fum | Fum | hydrogen ç | 2 | 0.032039  | linform              |
| 501 | Fum | Fum | hydrogen ç | 3 | 0.09357   | linform              |
| 502 | Fum | Pyr | hydrogen ç | 1 | -9.10E-05 | linform              |
| 503 | Fum | Pyr | hydrogen ç | 2 | 0.000957  | linform              |
| 504 | Fum | Pyr | hydrogen ç | 3 | -0.00257  | linform              |
| 505 | Fum | Suc | hydrogen ç | 1 | -0.00012  | linform              |
| 506 | Fum | Suc | hydrogen ç | 2 | -0.0001   | linform              |
| 507 | Fum | Suc | hydrogen ç | 3 | -0.0001   | linform              |
| 508 | Iso | Aco | hydrogen ç | 1 | 6.74E-06  | linform unreliable   |
| 509 | Iso | Aco | hydrogen ç | 2 | 3.03E-05  | linform unreliable   |
| 510 | Iso | Aco | hydrogen ç | 3 | -2.57E-06 | linform unreliable   |
| 511 | Iso | Akg | hydrogen ç | 1 |           | nd                   |
| 512 | Iso | Akg | hydrogen ç | 2 |           | nd                   |
| 513 | Iso | Akg | hydrogen ç | 3 |           | nd                   |
| 514 | Iso | Cit | hydrogen ç | 1 | -0.01808  | nlform               |
| 515 | Iso | Cit | hydrogen ç | 2 | -0.01647  | nlform               |
| 516 | Iso | Cit | hydrogen ç | 3 | -0.02696  | nlform               |

|     |     |     |            |   |          |         |             |
|-----|-----|-----|------------|---|----------|---------|-------------|
| 517 | Iso | Pyr | hydrogen ç | 1 |          |         | nd          |
| 518 | Iso | Pyr | hydrogen ç | 2 |          |         | nd          |
| 519 | Iso | Pyr | hydrogen ç | 3 |          |         | nd          |
| 520 | Iso | Ssa | hydrogen ç | 1 | 4.47E-07 | linform |             |
| 521 | Iso | Ssa | hydrogen ç | 2 | 6.66E-07 | linform |             |
| 522 | Iso | Ssa | hydrogen ç | 3 | 1.12E-06 | linform |             |
| 523 | Iso | Suc | hydrogen ç | 1 |          |         | nd          |
| 524 | Iso | Suc | hydrogen ç | 2 |          |         | nd          |
| 525 | Iso | Suc | hydrogen ç | 3 |          |         | nd          |
| 526 | Mal | Mal | hydrogen ç | 1 | 0.023334 | linform |             |
| 527 | Mal | Mal | hydrogen ç | 2 | 0.03639  | linform |             |
| 528 | Mal | Mal | hydrogen ç | 3 | -0.02328 | linform |             |
| 529 | Mal | Pyr | hydrogen ç | 1 | -0.00032 | linform |             |
| 530 | Mal | Pyr | hydrogen ç | 2 | 0.001574 | linform |             |
| 531 | Mal | Pyr | hydrogen ç | 3 | -0.00059 | linform |             |
| 532 | Mal | Suc | hydrogen ç | 1 | 0.001059 | linform |             |
| 533 | Mal | Suc | hydrogen ç | 2 | 0.000359 | linform |             |
| 534 | Mal | Suc | hydrogen ç | 3 | 0.00067  | linform |             |
| 535 | Suc | Aco | hydrogen ç | 1 |          |         | nd          |
| 536 | Suc | Aco | hydrogen ç | 2 | 0.003838 | exdc    |             |
| 537 | Suc | Aco | hydrogen ç | 3 | 0.008763 | exdc    |             |
| 538 | Suc | Pyr | hydrogen ç | 1 |          |         | nd          |
| 539 | Suc | Pyr | hydrogen ç | 2 |          |         | nd          |
| 540 | Suc | Pyr | hydrogen ç | 3 |          |         | nd          |
| 541 | Suc | Suc | hydrogen ç | 1 | 7.38E-07 | linform | low quality |
| 542 | Suc | Suc | hydrogen ç | 1 |          |         | nd          |
| 543 | Suc | Suc | hydrogen ç | 2 | 9.52E-07 | linform | low quality |
| 544 | Suc | Suc | hydrogen ç | 2 |          |         | nd          |
| 545 | Suc | Suc | hydrogen ç | 3 | 1.47E-06 | linform | low quality |
| 546 | Suc | Suc | hydrogen ç | 3 |          |         | nd          |
